# Supplementary material
Source: MDPI journal article supplement (https://www.mdpi.com/1424-2818/14/1/24)
Supplement: s1 [file s1]

Archive with 2 entries (2 files):
- Figures_S1-S62.pdf
- Tables_S1-S2.ods
