# Supplementary material
Source: MDPI journal article supplement (https://www.mdpi.com/1424-2818/14/1/24)
Supplement: s1 [file s1 › Tables_S1-S2.ods]

## Sheet: Table_S1_Helicini
ID	species clade	intraspecific clade	genus	species	identified by	date identified	basis for identification	locality	geographic coordinates (WGS84)	shells deposited in	collection number	isolate codes	16S acc. nos.	COI acc. nos.	COII acc. nos.	12S acc. nos.	CYTB acc. nos.	genome acc. no.	reference	comments	t-Val acc. nos.	ND6 acc. nos.	ND5 acc. nos.	ND1 acc. nos.	ND4L acc. nos.	ATP6 acc. nos.	ND3 acc. nos.	COX3 acc. nos.	ND4 acc. nos.	ND2 acc. nos.
HE000001	4	8	Helix	straminea	Korábek O.	2013	shell	Albania: Dibër county: Dejës Mts. E of Lis, deciduous forest with beech	41.6384°N 20.1450°E	SMF	341628	VL1	KF823065						Korábek et al. 2014
HE000002	10	29	Helix	secernenda	Korábek O.	2013	shell	Albania: Bogë env., mountains ca 2200 m a.s.l.	42.415°N 19.729°E	SMF	342517	DT5xDT51	KP072285		MW465501	MW446061			Korábek et al. 2015	geographic coordinates only indicative
HE000003	10	32	Helix	secernenda	Korábek O.	2013	shell	Albania: Bogë env., pass above Theth	42.4041°N 19.7365°E	SMF	342515	SC8	KP072387	KP072088					Korábek et al. 2015
HE000004	10	32	Helix	secernenda	Korábek O.	2013	shell	Albania: Bogë, village	42.4008°N 19.6602°E	SMF	342516	SC9	KP072388						Korábek et al. 2015
HE000005	55	203	Caucasotachea	vindobonensis	Korábek O.	2013	shell	Albania: Kalldrun near Koplik, spring	42.1942°N 19.4128°E	NMP	P6M 30528	CV3	MK482823	MK482997					Korábek et al. 2020
HE000006	24	89	Helix	lucorum	Korábek O.	2013	shell	Albania: Korçë County: Dunicë env.	40.8919°N 20.5597°E	NMP	P6M 30017	LC87	MG709081	MG709120					Korábek et al. 2018b
HE000007	1	1	Helix	philibinensis	Korábek O.	2017	shell	Albania: Korçe Distr.: Kallamas, at Liqueni i Prespës	40.8924°N 20.9393°E	NHMW	110430/MN/0800	PL20	MW443483	MW443888					this study
HE000008	1	1	Helix	philibinensis	Korábek O.	2017	shell	Albania: Korçe Distr.: Kallamas, at Liqueni i Prespës	40.8924°N 20.9393°E	NHMW	110430/MN/0800	PL21	MW443227						this study
HE000009	10	33	Helix	schlaeflii	Korábek O.	2013	shell	Albania: Krujë, rocks bellow castle	41.5079°N 19.7957°E	SMF	342512	SC61	KP072384						Korábek et al. 2015
HE000010	24	89	Helix	lucorum	Korábek O.	2013	shell	Albania: Moravë mts. SE of Drenovë, deciduous forest with beech	40.5857°N 20.8210°E	SMF	342508	LC3	KF823045	KF823081					Korábek et al. 2014
HE000011	10	29	Helix	secernenda	Korábek O.	2015	shell	Albania: north of Curraj i Epërm	42.3861°N 19.8850°E	SMF	360460	SC23	MW443484						this study
HE000012	10	35	Helix	secernenda	Korábek O.	2013	shell	Albania: Shkodër, Rozafa castle	42.0468°N 19.4931°E	SMF	342513	SC7	KP072385	KP072087					Korábek et al. 2015
HE000013	6	20	Helix	schlaeflii	Korábek O.	2017	shell	Albania: Tiranë Distr.: Mali i Dajtit, N of Maja e Dajtit	41.3691°N 19.9219°E	NHMW	110430/MN/0796	SH4	MW443485	MW443889					this study
HE000014	7	21	Helix	schlaeflii	Korábek O.	2013	shell	Albania: Vlorë county: Mali i Cikës, Llogara pass	40.1958°N 19.5986°E	SMF	342497	SC12	KP072382	KP072094	MW465502	KT211691			Korábek et al. 2015
HE000015	24	91	Helix	lucorum	Snegin E. A.	2015	shell	Armenia: Kapan env.	39.2203°N 46.4022°E	no voucher		LC100	MG709061						Korábek et al. 2018b
HE000016	24	94	Helix	lucorum	Korábek O.	2016	shell	Armenia: Zangezur Mts., Vahanavank monastery near Kapan	39.2164°N 46.3336°E	NMP	P6M 30018	LC95	MG709060	MG709110					Korábek et al. 2018b
HE000017	11	36	Helix	pomatia	Korábek O.	2015	shell	Austria: Burgenland: Donnerskirchen, in forest on hill slope above the village	47.9041°N 16.6259°E	NMP	P6M 29131	P_705	MF943652	MF944005					Korábek et al. 2018a
HE000018	11	36	Helix	pomatia	Korábek O.	2015	shell	Austria: Burgenland: Strebersdorf, bank of Stoober Bach	47.4532°N 16.6114°E	NMP	P6M 29132	P_722	MF943653	MF944006					Korábek et al. 2018a
HE000019	11	36	Helix	pomatia	Korábek O.	2016	shell	Austria: Kärnten: between Völkermarkt and Haimburg	46.6800°N 14.6692°E	NMP	P6M 29133	P_495	MF943777	MF944030					Korábek et al. 2018a
HE000020	11	36	Helix	pomatia	Korábek O.	2016	shell	Austria: Kärnten: Gmünd	46.9053°N 13.5342°E	NMP	P6M 29134	P_455	MF943779						Korábek et al. 2018a
HE000021	11	36	Helix	pomatia	Korábek O.	2015	shell	Austria: Kärnten: Maria Luggau	46.7036°N 12.7408°E	NMP	P6M 29135	PO19	MF943329						Korábek et al. 2018a
HE000022	11	36	Helix	pomatia	Korábek O.	2016	shell	Austria: Kärnten: Töschling	46.6344°N 14.1108°E	NMP	P6M 29136	P_873	MF943769						Korábek et al. 2018a
HE000023	11	36	Helix	pomatia	Korábek O.	2016	shell	Austria: Kärnten: Twimberg, A2 motorway	46.9286°N 14.8417°E	NMP	P6M 29137	P_882	MF943772						Korábek et al. 2018a
HE000024	11	36	Helix	pomatia	Korábek O.	2016	shell	Austria: Niederösterreich: Aggstein castle	48.3144°N 15.4222°E	NMP	P6M 29138	P_935	MF943717						Korábek et al. 2018a
HE000025	11	36	Helix	pomatia	Korábek O.	2016	shell	Austria: Niederösterreich: between Gaweinstal and Kollnbrunn	48.4697°N 16.5892°E	NMP	P6M 29139	P_875	MF943774						Korábek et al. 2018a
HE000026	11	36	Helix	pomatia	Korábek O.	2015	shell	Austria: Niederösterreich: Deutsch Brodersdorf, forest by Leitha	47.9414°N 16.4844°E	NMP	P6M 29140	P_738	MF943651						Korábek et al. 2018a
HE000027	55	204	Caucasotachea	vindobonensis	Korábek O.	2015	shell	Austria: Niederösterreich: Deutsch Brodersdorf, forest by Leitha	47.9414°N 16.4844°E	no voucher		CP26	MK482749	MK482926					Korábek et al. 2020
HE000028	11	36	Helix	pomatia	Korábek O.	2016	shell	Austria: Niederösterreich: Fürstenau – Gassen	48.1558°N 15.2928°E	NMP	P6M 29141	P_929	MF943715						Korábek et al. 2018a
HE000029	11	36	Helix	pomatia	Korábek O.	2016	shell	Austria: Niederösterreich: Gaming	47.9261°N 15.0839°E	NMP	P6M 29142	P_924	MF943714						Korábek et al. 2018a
HE000030	11	36	Helix	pomatia	Korábek O.	2016	shell	Austria: Niederösterreich: Gänserndorf	48.3147°N 16.7119°E	NMP	P6M 29143	P_454	MF943781	MF944032					Korábek et al. 2018a
HE000031	11	36	Helix	pomatia	Korábek O.	2016	shell	Austria: Niederösterreich: Groißenbrunn	48.2203°N 16.8983°E	NMP	P6M 29144	P_885	MF943776						Korábek et al. 2018a
HE000032	11	36	Helix	pomatia	Korábek O.	2013	shell	Austria: Niederösterreich: Hardegg, castle	48.8539°N 15.8575°E	SMF	346022	P_16	KT211736						Korábek et al. 2016
HE000033	11	36	Helix	pomatia	Korábek O.	2013	shell	Austria: Niederösterreich: Hardegg, castle	48.8539°N 15.8575°E	SMF	346022	P_28	MF943835						Korábek et al. 2018a
HE000034	11	36	Helix	pomatia	Korábek O.	2016	shell	Austria: Niederösterreich: Hohenberg, Furthof Schöntal	47.9222°N 15.6153°E	NMP	P6M 29145	P_874	MF943778						Korábek et al. 2018a
HE000035	11	36	Helix	pomatia	Korábek O.	2016	shell	Austria: Niederösterreich: Kliensitzendorf, road to Helfens	48.5286°N 16.4161°E	NMP	P6M 29146	P_887	MF943770						Korábek et al. 2018a
HE000036	11	36	Helix	pomatia	Korábek O.	2016	shell	Austria: Niederösterreich: Krems an der Donau, Egelsee, Schießstätte	48.4240°N 15.5570°E	NMP	P6M 29147	P_927	MF943719						Korábek et al. 2018a
HE000037	11	36	Helix	pomatia	Korábek O.	2014	shell	Austria: Niederösterreich: Lunz am See, above the Mittersee Lake	47.8236°N 15.0775°E	no voucher		P_171	MF943461						Korábek et al. 2018a
HE000038	11	36	Helix	pomatia	Korábek O.	2016	shell	Austria: Niederösterreich: Melk, by bridge over Danube	48.2392°N 15.3490°E	NMP	P6M 29148	P_923	MF943716						Korábek et al. 2018a
HE000039	11	36	Helix	pomatia	Korábek O.	2015	shell	Austria: Niederösterreich: Mödling, Doktor-Ludwig-Rieger-Straße	48.0753°N 16.2843°E	NMP	P6M 29149	P_720	MF943643	MF944003					Korábek et al. 2018a
HE000040	55	205	Caucasotachea	vindobonensis	Korábek O.	2016	shell	Austria: Niederösterreich: Oberarnsdorf	48.3513°N 15.4132°E	NMP	P6M 29877	CV101	MK482786						Korábek et al. 2020
HE000041	11	42	Helix	pomatia	Korábek O.	2016	shell	Austria: Niederösterreich: Oberfellabrunn	48.5588°N 16.0131°E	NMP	P6M 29150	P_926	MF943721	MF944013					Korábek et al. 2018a
HE000042	11	36	Helix	pomatia	Korábek O.	2016	shell	Austria: Niederösterreich: Rohr im Gebirge, Zellenbach	47.8722°N 15.7864°E	NMP	P6M 29151	P_860	MF943773						Korábek et al. 2018a
HE000043	11	36	Helix	pomatia	Korábek O.	2016	shell	Austria: Niederösterreich: Ronthal	48.4977°N 15.7864°E	NMP	P6M 29152	P_930	MF943720						Korábek et al. 2018a
HE000044	11	36	Helix	pomatia	Korábek O.	2016	shell	Austria: Niederösterreich: Rührsdorf	48.3951°N 15.4829°E	NMP	P6M 29153	P_931	MF943718						Korábek et al. 2018a
HE000045	55	205	Caucasotachea	vindobonensis	Korábek O.	2016	shell	Austria: Niederösterreich: Rührsdorf	48.3951°N 15.4829°E	NMP	P6M 29878	CV100	MK482784						Korábek et al. 2020
HE000046	11	36	Helix	pomatia	Korábek O.	2016	shell	Austria: Niederösterreich: Wopfing, cement plant	47.8714°N 16.0831°E	NMP	P6M 29154	P_494	MF943771						Korábek et al. 2018a
HE000047	11	36	Helix	pomatia	Korábek O.	2016	shell	Austria: Oberösterreich: Asten env., Raffelstetten	48.2436°N 14.4077°E	NMP	P6M 29155	P_920	MF943700						Korábek et al. 2018a
HE000048	11	36	Helix	pomatia	Korábek O.	2014	shell	Austria: Oberösterreich: fen by road L101 near Annarote	47.8514°N 15.3894°E	no voucher		P_172	MF943462						Korábek et al. 2018a
HE000049	11	36	Helix	pomatia	Korábek O.	2016	shell	Austria: Oberösterreich: Friestadt, Walchshof	48.4836°N 14.5124°E	NMP	P6M 29156	P_914	MF943699						Korábek et al. 2018a
HE000050	11	36	Helix	pomatia	Korábek O.	2014	shell	Austria: Oberösterreich: Grünau im Almtal, Almtalerhaus	47.7552°N 14.0169°E	NMP	P6M 29157	P_412	MF943438						Korábek et al. 2018a
HE000051	11	36	Helix	pomatia	Korábek O.	2016	shell	Austria: Oberösterreich: Grünburg	47.9631°N 14.2549°E	NMP	P6M 29158	P_922	MF943701						Korábek et al. 2018a
HE000052	11	36	Helix	pomatia	Korábek O.	2016	shell	Austria: Oberösterreich: Roßleithen env., path from Gleinkersee to Pießling-Ursprung	47.6945°N 14.2907°E	NMP	P6M 29159	P_919	MF943702						Korábek et al. 2018a
HE000053	11	36	Helix	pomatia	Neiber M. T.		shell	Austria: Oberösterreich: Salzkammergut, between the upper station of the Salzbergbahn Hallstatt and Gosauzwang	47.5653°N 13.6472°E	coll. Neiber M. T.		MN271	MF943684						Korábek et al. 2018a
HE000054	11	36	Helix	pomatia	Neiber M. T.		shell	Austria: Oberösterreich: Salzkammergut, Bürglstein am Wolfgangsee	47.7272°N 13.4800°E	coll. Neiber M. T.		MN272	MF943685						Korábek et al. 2018a
HE000055	11	36	Helix	pomatia	Neiber M. T.		shell	Austria: Oberösterreich: Salzkammergut, Bürglstein am Wolfgangsee	47.7272°N 13.4800°E	coll. Neiber M. T.		MN273	MF943876						Korábek et al. 2018a
HE000056	11	36	Helix	pomatia	Korábek O.	2016	shell	Austria: Steiermark: Bärnbach env., Kohlschwarz	47.1124°N 15.1291°E	NMP	P6M 29161	P_916	MF943707						Korábek et al. 2018a
HE000057	11	36	Helix	pomatia	Korábek O.	2016	shell	Austria: Steiermark: Dienersdorf	47.2490°N 15.8920°E	NMP	P6M 29162	P_915	MF943709						Korábek et al. 2018a
HE000058	11	36	Helix	pomatia	Korábek O.	2016	shell	Austria: Steiermark: Gaishorn am See	47.4976°N 14.5391°E	NMP	P6M 29163	P_917	MF943703						Korábek et al. 2018a
HE000059	11	36	Helix	pomatia	Korábek O.	2015	shell	Austria: Steiermark: Gralla, gas station on highway A9	46.8310°N 15.5532°E	NMP	P6M 29164	P_731	MF943676						Korábek et al. 2018a
HE000060	11	36	Helix	pomatia	Korábek O.	2016	shell	Austria: Steiermark: Hirschegg env., Stampf	47.0013°N 15.0068°E	NMP	P6M 29165	P_932	MF943706						Korábek et al. 2018a
HE000061	11	36	Helix	pomatia	Korábek O.	2016	shell	Austria: Steiermark: Hochschwab-Straße between Greith and Rotmoos	47.6986°N 15.1926°E	NMP	P6M 29166	P_918	MF943712						Korábek et al. 2018a
HE000062	11	36	Helix	pomatia	Korábek O.	2016	shell	Austria: Steiermark: Hochschwab-Straße between Greith and Rotmoos	47.6986°N 15.1926°E	NMP	P6M 29166	P_934	MF943880	MF944070					Korábek et al. 2018a
HE000063	11	36	Helix	pomatia	Korábek O.	2016	shell	Austria: Steiermark: Judenburg, Strettweg	47.1772°N 14.6597°E	NMP	P6M 29167	P_886	MF943775						Korábek et al. 2018a
HE000064	11	36	Helix	pomatia	Korábek O.	2016	shell	Austria: Steiermark: Langewang	47.5618°N 15.6376°E	NMP	P6M 29168	P_928	MF943710						Korábek et al. 2018a
HE000065	11	36	Helix	pomatia	Korábek O.	2016	shell	Austria: Steiermark: Mariazell	47.7711°N 15.3194°E	NMP	P6M 29169	P_933	MF943711						Korábek et al. 2018a
HE000066	11	36	Helix	pomatia	Korábek O.	2016	shell	Austria: Steiermark: Murau	47.1128°N 14.1472°E	NMP	P6M 29170	P_884	MF943780	MF944031					Korábek et al. 2018a
HE000067	11	36	Helix	pomatia	Korábek O.	2016	shell	Austria: Steiermark: Oberaich	47.4025°N 15.2296°E	NMP	P6M 29171	P_912	MF943704						Korábek et al. 2018a
HE000068	11	36	Helix	pomatia	Korábek O.	2016	shell	Austria: Steiermark: Palfau	47.7129°N 14.8300°E	NMP	P6M 29172	P_925	MF943713						Korábek et al. 2018a
HE000069	11	36	Helix	pomatia	Korábek O.	2016	shell	Austria: Steiermark: Peggau, Lurgrotte	47.2159°N 15.3439°E	NMP	P6M 29173	P_913	MF943705						Korábek et al. 2018a
HE000070	11	38	Helix	pomatia	Korábek O.	2016	shell	Austria: Steriermark: Lembach	47.0959°N 15.5905°E	NMP	P6M 29174	P_921	MF943708						Korábek et al. 2018a
HE000071	11	36	Helix	pomatia	Korábek O.	2015	shell	Austria: Tirol: Innsbruck, Kranebitten	47.2620°N 11.3289°E	NMP	P6M 29175	P_621	MF943631						Korábek et al. 2018a
HE000072	11	36	Helix	pomatia	Korábek O.	2014	shell	Austria: Tirol: Pfunds	46.9685°N 10.5333°E	NMP	P6M 29160	P_303	MF943502						Korábek et al. 2018a
HE000073	11	36	Helix	pomatia	Korábek O.	2016	shell	Austria: Vorarlberg: Bregenz – Lochau	47.5153°N 9.7542°E	NMP	P6M 29176	P_464	MF943733						Korábek et al. 2018a
HE000074	11	36	Helix	pomatia	Korábek O.	2014	shell	Austria: Wien, above Heligenstädter Strasse	48.2784°N 16.3460°E	NMP	P6M 29178	P_119	MF943374						Korábek et al. 2018a
HE000075	11	36	Helix	pomatia	Korábek O.	2014	shell	Austria: Wien, Florisdorfer Aupark	48.2558°N 16.3889°E	NMP	P6M 29180	P_176	MF943375						Korábek et al. 2018a
HE000076	24	91	Helix	lucorum	Korábek O.	2013	shell	Azerbaijan: Ağdam	40.0°N 46.9°E	SMF	342507	LC21	KP072316	KP072130					Korábek et al. 2015	geographic coordinates only indicative
HE000077	11	36	Helix	pomatia	Horsák M.	2017	shell	Belarus: Miranka W of Stolvtsy	53.52°N 26.43°E	no voucher		P_977	MF943939						Korábek et al. 2018a
HE000078	11	36	Helix	pomatia	Horsák M.	2017	shell	Belarus: roadside E of Kamai	55.0797°N 26.6444°E	no voucher		P_976	MF943940						Korábek et al. 2018a
HE000079	11	36	Helix	pomatia	Horsák M.	2017	shell	Belarus: roadside E of Kamai	55.0797°N 26.6444°E	no voucher		P_975	MF943941						Korábek et al. 2018a
HE000080	11	36	Helix	pomatia	Horsák M.	2017	shell	Belarus: Valeikovichi NW of Smorhon’, Mertvoye ozero	54.58°N 26.25°E	no voucher		P_978	MF943938						Korábek et al. 2018a
HE000081	11	36	Helix	pomatia	Korábek O.	2015	shell	Belgium: Vlaams-Brabant: Dreislinter	50.8453°N 5.0626°E	NMP	P6M 29182	P_716	MF943638	MF944002					Korábek et al. 2018a
HE000082	55	204	Caucasotachea	vindobonensis	Korábek O.	2015	shell	Bosnia and Herzegovina: Dobrič W of Mostar	43.3636°N 17.6767°E	NMP	P6M 29879	CP50	MK482772	MK482949					Korábek et al. 2020
HE000083	11	42	Helix	pomatia	Korábek O.	2016	shell	Bosnia and Herzegovina: Fed. of Bosnia and Herz.: Bihać	44.8349°N 15.8822°E	NMP	P6M 29184	P_842	MF943809	MF944048					Korábek et al. 2018a
HE000084	11	42	Helix	pomatia	Korábek O.	2016	shell	Bosnia and Herzegovina: Fed. of Bosnia and Herz.: Bihać	44.8349°N 15.8822°E	NMP	P6M 29184	P_897	MF943907						Korábek et al. 2018a
HE000085	55	204	Caucasotachea	vindobonensis	Korábek O.	2016	shell	Bosnia and Herzegovina: Fed. of Bosnia and Herz.: Bjelave env., road to Donji Podpeć	44.6515°N 18.5356°E	NMP	P6M 29880	CV68	MK482859	MK483033					Korábek et al. 2020
HE000086	55	204	Caucasotachea	vindobonensis	Korábek O.	2016	shell	Bosnia and Herzegovina: Fed. of Bosnia and Herz.: Bjelave env., road to Donji Podpeć	44.6515°N 18.5356°E	NMP	P6M 29880	CV94	MK482888	MK483062					Korábek et al. 2020
HE000087	11	42	Helix	pomatia	Korábek O.	2016	shell	Bosnia and Herzegovina: Fed. of Bosnia and Herz.: Bosanska Krupa	44.8851°N 16.1517°E	NMP	P6M 29186	P_844	MF943810						Korábek et al. 2018a
HE000088	11	40	Helix	pomatia	Korábek O.	2016	shell	Bosnia and Herzegovina: Fed. of Bosnia and Herz.: Čanići	44.5935°N 18.5961°E	NMP	P6M 29187	P_8151	MF943792	MF944040					Korábek et al. 2018a
HE000089	10	35	Helix	secernenda	Korábek O.	2016	shell	Bosnia and Herzegovina: Fed. of Bosnia and Herz.: Donja Drežnica	43.5253°N 17.7144°E	SMF	360461	SC27	MW443486						this study
HE000090	55	204	Caucasotachea	vindobonensis	Korábek O.	2016	shell	Bosnia and Herzegovina: Fed. of Bosnia and Herz.: Donji Lukavac env.	44.8238°N 18.4520°E	NMP	P6M 29881	CV96	MK482890	MK483064					Korábek et al. 2020
HE000091	55	204	Caucasotachea	vindobonensis	Korábek O.	2016	shell	Bosnia and Herzegovina: Fed. of Bosnia and Herz.: Donji Lukavac env.	44.8238°N 18.4520°E	NMP	P6M 29881	CV97	MK482891	MK483065					Korábek et al. 2020
HE000092	11	38	Helix	pomatia	Korábek O.	2016	shell	Bosnia and Herzegovina: Fed. of Bosnia and Herz.: Donji Vakuf	44.1423°N 17.3929°E	NMP	P6M 29188	P_8121	MF943801						Korábek et al. 2018a
HE000093	11	38	Helix	pomatia	Korábek O.	2016	shell	Bosnia and Herzegovina: Fed. of Bosnia and Herz.: Donji Vakuf	44.1423°N 17.3929°E	NMP	P6M 29188	P_893	MF943902						Korábek et al. 2018a
HE000094	11	42	Helix	pomatia	Korábek O.	2016	shell	Bosnia and Herzegovina: Fed. of Bosnia and Herz.: Drvar, Titova pečina	44.3813°N 16.3839°E	NMP	P6M 29189	P_832	MF943807	MF944047					Korábek et al. 2018a
HE000095	55	203	Caucasotachea	vindobonensis	Korábek O.	2016	shell	Bosnia and Herzegovina: Fed. of Bosnia and Herz.: Drvar, Titova pečina	44.3813°N 16.3839°E	NMP	P6M 29882	CV114	MK482801	MK482975					Korábek et al. 2020
HE000096	55	203	Caucasotachea	vindobonensis	Korábek O.	2016	shell	Bosnia and Herzegovina: Fed. of Bosnia and Herz.: Drvar, Titova pečina	44.3813°N 16.3839°E	NMP	P6M 29882	CV117	MK482804	MK482978					Korábek et al. 2020
HE000097	11	38	Helix	pomatia	Korábek O.	2016	shell	Bosnia and Herzegovina: Fed. of Bosnia and Herz.: Gornji Vakuf-Uskoplje, road to Prozor	43.9242°N 17.6053°E	NMP	P6M 29190	P_845	MF943800						Korábek et al. 2018a
HE000098	8	26	Helix	pomatia	Korábek O.	2016	shell	Bosnia and Herzegovina: Fed. of Bosnia and Herz.: Hadžići, Dupovci	43.8151°N 18.1923°E	NMP	P6M 29191	P_822	MF943797	MF944043					Korábek et al. 2018a
HE000099	55	204	Caucasotachea	vindobonensis	Korábek O.	2016	shell	Bosnia and Herzegovina: Fed. of Bosnia and Herz.: Jablanica	43.6644°N 17.7685°E	NMP	P6M 29883	CV86	MK482879	MK483053					Korábek et al. 2020
HE000100	55	204	Caucasotachea	vindobonensis	Korábek O.	2016	shell	Bosnia and Herzegovina: Fed. of Bosnia and Herz.: Jablanica	43.6644°N 17.7685°E	NMP	P6M 29883	CV88	MK482881	MK483055					Korábek et al. 2020
HE000101	11	38	Helix	pomatia	Korábek O.	2016	shell	Bosnia and Herzegovina: Fed. of Bosnia and Herz.: Jajce, castle	44.3400°N 17.2689°E	NMP	P6M 29192	P_856	MF943802						Korábek et al. 2018a
HE000102	11	38	Helix	pomatia	Korábek O.	2016	shell	Bosnia and Herzegovina: Fed. of Bosnia and Herz.: Jajce, waterfall	44.3375°N 17.2704°E	NMP	P6M 29193	P_825	MF943803						Korábek et al. 2018a
HE000103	55	204	Caucasotachea	vindobonensis	Korábek O.	2016	shell	Bosnia and Herzegovina: Fed. of Bosnia and Herz.: Jajce, waterfall	44.3375°N 17.2704°E	NMP	P6M 29884	CV92	MK482886	MK483060					Korábek et al. 2020
HE000104	55	204	Caucasotachea	vindobonensis	Korábek O.	2016	shell	Bosnia and Herzegovina: Fed. of Bosnia and Herz.: Jajce, waterfall	44.3375°N 17.2704°E	NMP	P6M 29884	CV93	MK482887	MK483061					Korábek et al. 2020
HE000105	11	42	Helix	pomatia	Korábek O.	2016	shell	Bosnia and Herzegovina: Fed. of Bosnia and Herz.: Klenovac	44.5475°N 16.6143°E	NMP	P6M 29194	P_836	MF943805	MF944046					Korábek et al. 2018a
HE000106	11	42	Helix	pomatia	Korábek O.	2016	shell	Bosnia and Herzegovina: Fed. of Bosnia and Herz.: Klenovac	44.5475°N 16.6143°E	NMP	P6M 29194	P_898	MF943904						Korábek et al. 2018a
HE000107	55	204	Caucasotachea	vindobonensis	Korábek O.	2016	shell	Bosnia and Herzegovina: Fed. of Bosnia and Herz.: Kulen Vakuf	44.5691°N 16.0827°E	NMP	P6M 29885	CV80	MK482873	MK483047					Korábek et al. 2020
HE000108	11	38	Helix	pomatia	Korábek O.	2015	shell	Bosnia and Herzegovina: Fed. of Bosnia and Herz.: Maglaj, castle	44.5438°N 18.1022°E	NMP	P6M 29206	P_614	MF943630						Korábek et al. 2018a
HE000109	11	38	Helix	pomatia	Korábek O.	2015	shell	Bosnia and Herzegovina: Fed. of Bosnia and Herz.: Maglaj, castle	44.5438°N 18.1022°E	NMP	P6M 29206	P_804	MF943871						Korábek et al. 2018a
HE000110	11	39	Helix	pomatia	Korábek O.	2016	shell	Bosnia and Herzegovina: Fed. of Bosnia and Herz.: Olovo	44.1255°N 18.5801°E	NMP	P6M 29196	P_829	MF943794	MF944042					Korábek et al. 2018a
HE000111	11	39	Helix	pomatia	Korábek O.	2016	shell	Bosnia and Herzegovina: Fed. of Bosnia and Herz.: Olovo	44.1255°N 18.5801°E	NMP	P6M 29196	P_895	MF943898						Korábek et al. 2018a
HE000112	55	204	Caucasotachea	vindobonensis	Korábek O.	2016	shell	Bosnia and Herzegovina: Fed. of Bosnia and Herz.: Olovo	44.1255°N 18.5801°E	NMP	P6M 29886	CV85	MK482878	MK483052					Korábek et al. 2020
HE000113	11	42	Helix	pomatia	Korábek O.	2016	shell	Bosnia and Herzegovina: Fed. of Bosnia and Herz.: Orašac	44.6292°N 16.0716°E	NMP	P6M 29197	P_841	MF943808						Korábek et al. 2018a
HE000114	11	42	Helix	pomatia	Korábek O.	2016	shell	Bosnia and Herzegovina: Fed. of Bosnia and Herz.: Orašac	44.6292°N 16.0716°E	NMP	P6M 29197	P_891	MF943906						Korábek et al. 2018a
HE000115	11	42	Helix	pomatia	Korábek O.	2016	shell	Bosnia and Herzegovina: Fed. of Bosnia and Herz.: Oštrelj	44.4788°N 16.4028°E	NMP	P6M 29198	P_838	MF943806						Korábek et al. 2018a
HE000116	11	42	Helix	pomatia	Korábek O.	2016	shell	Bosnia and Herzegovina: Fed. of Bosnia and Herz.: Oštrelj	44.4788°N 16.4028°E	NMP	P6M 29198	P_878	MF943905						Korábek et al. 2018a
HE000117	11	42	Helix	pomatia	Korábek O.	2016	shell	Bosnia and Herzegovina: Fed. of Bosnia and Herz.: Pobrežje	44.7833°N 16.6359°E	NMP	P6M 29199	P_834	MF943812						Korábek et al. 2018a
HE000118	8	26	Helix	pomatia	Korábek O.	2016	shell	Bosnia and Herzegovina: Fed. of Bosnia and Herz.: road to Konjic, railway bridge near Kanjina	43.6884°N 17.9855°E	NMP	P6M 29201	P_820	MF943798	MF944044					Korábek et al. 2018a
HE000119	8	26	Helix	pomatia	Korábek O.	2016	shell	Bosnia and Herzegovina: Fed. of Bosnia and Herz.: road to Konjic, railway bridge near Kanjina	43.6884°N 17.9855°E	NMP	P6M 29201	P_857	MF943901						Korábek et al. 2018a
HE000120	55	204	Caucasotachea	vindobonensis	Korábek O.	2016	shell	Bosnia and Herzegovina: Fed. of Bosnia and Herz.: road to Konjic, railway bridge near Kanjina	43.6884°N 17.9855°E	NMP	P6M 29887	CV115	MK482802	MK482976					Korábek et al. 2020
HE000121	55	204	Caucasotachea	vindobonensis	Korábek O.	2016	shell	Bosnia and Herzegovina: Fed. of Bosnia and Herz.: road to Konjic, railway bridge near Kanjina	43.6884°N 17.9855°E	NMP	P6M 29887	CV118	MK482805	MK482979					Korábek et al. 2020
HE000122	11	38	Helix	pomatia	Korábek O.	2016	shell	Bosnia and Herzegovina: Fed. of Bosnia and Herz.: S of Donji Lukavac, Vučkovci env.	44.8042°N 18.4760°E	NMP	P6M 29202	P_8111	MF943791	MF944039					Korábek et al. 2018a
HE000123	11	38	Helix	pomatia	Korábek O.	2016	shell	Bosnia and Herzegovina: Fed. of Bosnia and Herz.: S of Donji Lukavac, Vučkovci env.	44.8042°N 18.4760°E	NMP	P6M 29202	P_881	MF943896						Korábek et al. 2018a
HE000124	8	26	Helix	pomatia	Korábek O.	2016	shell	Bosnia and Herzegovina: Fed. of Bosnia and Herz.: Sarajevo, Kovači Street	43.8603°N 18.4322°E	NMP	P6M 29203	P_816	MF943796						Korábek et al. 2018a
HE000125	8	26	Helix	pomatia	Korábek O.	2016	shell	Bosnia and Herzegovina: Fed. of Bosnia and Herz.: Slatina near Jablanica	43.7071°N 17.7167°E	NMP	P6M 29204	P_827	MF943799	MF944045					Korábek et al. 2018a
HE000126	8	26	Helix	cf. pomatia	Korábek O.	2016	shell	Bosnia and Herzegovina: Fed. of Bosnia and Herz.: Vogošća	43.9029°N 18.3302°E	NMP	P6M 29130	P_8141	MF943795						Korábek et al. 2018a
HE000127	8	26	Helix	cf. pomatia	Korábek O.	2016	shell	Bosnia and Herzegovina: Fed. of Bosnia and Herz.: Vogošća	43.9029°N 18.3302°E	NMP	P6M 29130	P_818	MF943899						Korábek et al. 2018a
HE000128	55	205	Caucasotachea	vindobonensis	Korábek O.	2016	shell	Bosnia and Herzegovina: Fed. of Bosnia and Herz.: Vogošća	43.9029°N 18.3302°E	NMP	P6M 29888	CV89	MK482882	MK483056					Korábek et al. 2020
HE000129	55	203	Caucasotachea	vindobonensis	Korábek O.	2016	shell	Bosnia and Herzegovina: Fed. of Bosnia and Herz.: Vogošća	43.9029°N 18.3302°E	NMP	P6M 29888	CV91	MK482885	MK483059					Korábek et al. 2020
HE000130	11	39	Helix	pomatia	Korábek O.	2016	shell	Bosnia and Herzegovina: Fed. of Bosnia and Herz.: Zukići env., near quarry in valley S in direction Tuzla	44.3588°N 18.6716°E	NMP	P6M 29205	P_831	MF943793	MF944041					Korábek et al. 2018a
HE000131	11	39	Helix	pomatia	Korábek O.	2016	shell	Bosnia and Herzegovina: Fed. of Bosnia and Herz.: Zukići env., near quarry in valley S in direction Tuzla	44.3588°N 18.6716°E	NMP	P6M 29205	P_888	MF943897						Korábek et al. 2018a
HE000132	55	204	Caucasotachea	vindobonensis	Korábek O.	2016	shell	Bosnia and Herzegovina: Fed. of Bosnia and Herz.: Zukići env., near quarry in valley S in direction Tuzla	44.3588°N 18.6716°E	NMP	P6M 29889	CV107	MK482793	MK482968					Korábek et al. 2020
HE000133	11	38	Helix	pomatia	Korábek O.	2015	shell	Bosnia and Herzegovina: Fed. of Bosnia and Hez.: Bosna valley near Janjići south of Zenica	44.147°N 17.946°E	NMP	P6M 29183	P_449	MF943547						Korábek et al. 2018a	geographic coordinates only indicative
HE000134	11	42	Helix	pomatia	Korábek O.	2015	shell	Bosnia and Herzegovina: Fed. of Bosnia and Hez.: Bosna valley near Janjići south of Zenica	44.147°N 17.946°E	NMP	P6M 29183	P_606	MF943857						Korábek et al. 2018a	geographic coordinates only indicative
HE000135	11	38	Helix	pomatia	Korábek O.	2015	shell	Bosnia and Herzegovina: Fed. of Bosnia and Hez.: Bosna valley near Janjići south of Zenica	44.147°N 17.946°E	NMP	P6M 29183	P_335	MF943858						Korábek et al. 2018a	geographic coordinates only indicative
HE000136	11	38	Helix	pomatia	Korábek O.	2015	shell	Bosnia and Herzegovina: Fed. of Bosnia and Hez.: Bosna valley near Janjići south of Zenica	44.147°N 17.946°E	NMP	P6M 29183	P_339	MF943859						Korábek et al. 2018a	geographic coordinates only indicative
HE000137	8	26	Helix	pomatia	Korábek O.	2015	shell	Bosnia and Herzegovina: Fed. of Bosnia and Hez.: Bosna valley near Janjići south of Zenica	44.147°N 17.946°E	NMP	P6M 29183	P_345	MF943860						Korábek et al. 2018a	geographic coordinates only indicative
HE000138	10	35	Helix	secernenda	Korábek O.	2016	shell	Bosnia and Herzegovina: Fed. of Bosnia and Hez.: Livno, limestone cliffs above Izvori	43.833°N 17.008°E	SMF	360462	SC26	MW443487	MW443890					this study	geographic coordinates only indicative
HE000139	10	35	Helix	secernenda	Korábek O.	2013	shell	Bosnia and Herzegovina: Fed. of Bosnia and Hez.: Mostar	43.3333°N 17.8178°E	SMF	342500	SC4	KF823058	KF823094					Korábek et al. 2014
HE000140	11	42	Helix	pomatia	Korábek O.	2016	shell	Bosnia and Herzegovina: Rep. Srpska: Banja Luka, Vujinovići	44.8357°N 17.2145°E	NMP	P6M 29207	P_853	MF943814	MF944051					Korábek et al. 2018a
HE000141	11	42	Helix	pomatia	Korábek O.	2016	shell	Bosnia and Herzegovina: Rep. Srpska: Banja Luka, Vujinovići	44.8357°N 17.2145°E	NMP	P6M 29207	P_879	MF943910	MF944077					Korábek et al. 2018a
HE000142	55	204	Caucasotachea	vindobonensis	Korábek O.	2016	shell	Bosnia and Herzegovina: Rep. Srpska: Banja Luka, Vujinovići	44.8357°N 17.2145°E	NMP	P6M 29890	CV79	MK482871	MK483045					Korábek et al. 2020
HE000143	11	42	Helix	pomatia	Korábek O.	2016	shell	Bosnia and Herzegovina: Rep. Srpska: between Blagaj Rijeka and Svodna	45.0353°N 15.5036°E	NMP	P6M 29208	P_835	MF943811	MF944049					Korábek et al. 2018a
HE000144	11	42	Helix	pomatia	Korábek O.	2016	shell	Bosnia and Herzegovina: Rep. Srpska: between Blagaj Rijeka and Svodna	45.0353°N 15.5036°E	NMP	P6M 29208	P_892	MF943908						Korábek et al. 2018a
HE000145	55	204	Caucasotachea	vindobonensis	Korábek O.	2016	shell	Bosnia and Herzegovina: Rep. Srpska: Bosanski Novi/Novi Grad	45.0490°N 16.3858°E	NMP	P6M 29891	CV83	MK482876	MK483050					Korábek et al. 2020
HE000146	55	204	Caucasotachea	vindobonensis	Korábek O.	2016	shell	Bosnia and Herzegovina: Rep. Srpska: Bosanski Novi/Novi Grad	45.0490°N 16.3858°E	NMP	P6M 29891	CV84	MK482877	MK483051					Korábek et al. 2020
HE000147	11	42	Helix	pomatia	Korábek O.	2016	shell	Bosnia and Herzegovina: Rep. Srpska: Čađavica	44.4890°N 16.9225°E	NMP	P6M 29209	P_823	MF943804						Korábek et al. 2018a
HE000148	11	42	Helix	pomatia	Korábek O.	2016	shell	Bosnia and Herzegovina: Rep. Srpska: Čađavica	44.4890°N 16.9225°E	NMP	P6M 29209	P_889	MF943903	MF944075					Korábek et al. 2018a
HE000149	11	42	Helix	pomatia	Korábek O.	2016	shell	Bosnia and Herzegovina: Rep. Srpska: Gornji Teslić	44.5861°N 17.7765°E	NMP	P6M 29210	P_843	MF943816	MF944053					Korábek et al. 2018a
HE000150	11	42	Helix	pomatia	Korábek O.	2016	shell	Bosnia and Herzegovina: Rep. Srpska: Gornji Teslić	44.5861°N 17.7765°E	NMP	P6M 29210	P_890	MF943912						Korábek et al. 2018a
HE000151	55	204	Caucasotachea	vindobonensis	Korábek O.	2016	shell	Bosnia and Herzegovina: Rep. Srpska: Gornji Teslić	44.5861°N 17.7765°E	NMP	P6M 29892	CV81	MK482874	MK483048					Korábek et al. 2020
HE000152	11	42	Helix	pomatia	Korábek O.	2016	shell	Bosnia and Herzegovina: Rep. Srpska: Kotor Varoš	44.6271°N 17.3710°E	NMP	P6M 29211	P_837	MF943815	MF944052					Korábek et al. 2018a
HE000153	11	42	Helix	pomatia	Korábek O.	2016	shell	Bosnia and Herzegovina: Rep. Srpska: Kotor Varoš	44.6271°N 17.3710°E	NMP	P6M 29211	P_510	MF943911						Korábek et al. 2018a
HE000154	55	204	Caucasotachea	vindobonensis	Korábek O.	2016	shell	Bosnia and Herzegovina: Rep. Srpska: Kotor Varoš	44.6271°N 17.3710°E	NMP	P6M 29893	CV73	MK482865	MK483039					Korábek et al. 2020
HE000155	55	205	Caucasotachea	vindobonensis	Korábek O.	2016	shell	Bosnia and Herzegovina: Rep. Srpska: Kotor Varoš	44.6271°N 17.3710°E	NMP	P6M 29893	CV74	MK482866	MK483040					Korábek et al. 2020
HE000156	11	42	Helix	pomatia	Korábek O.	2016	shell	Bosnia and Herzegovina: Rep. Srpska: Lučani by Prnjavor	44.8456°N 17.6926°E	NMP	P6M 29212	P_840	MF943817	MF944054					Korábek et al. 2018a
HE000157	11	42	Helix	pomatia	Korábek O.	2016	shell	Bosnia and Herzegovina: Rep. Srpska: Lučani by Prnjavor	44.8456°N 17.6926°E	NMP	P6M 29212	P_899	MF943913						Korábek et al. 2018a
HE000158	55	204	Caucasotachea	vindobonensis	Korábek O.	2016	shell	Bosnia and Herzegovina: Rep. Srpska: Lučani by Prnjavor	44.8456°N 17.6926°E	NMP	P6M 29894	CV82	MK482875	MK483049					Korábek et al. 2020
HE000159	11	38	Helix	pomatia	Korábek O.	2016	shell	Bosnia and Herzegovina: Rep. Srpska: Podnovlje	44.9410°N 18.1197°E	NMP	P6M 29213	P_819	MF943790						Korábek et al. 2018a
HE000160	11	42	Helix	pomatia	Korábek O.	2016	shell	Bosnia and Herzegovina: Rep. Srpska: Podnovlje	44.9410°N 18.1197°E	NMP	P6M 29213	P_877	MF943895	MF944073					Korábek et al. 2018a
HE000161	55	204	Caucasotachea	vindobonensis	Korábek O.	2016	shell	Bosnia and Herzegovina: Rep. Srpska: Podnovlje	44.9410°N 18.1197°E	NMP	P6M 29895	CV111	MK482798	MK482973					Korábek et al. 2020
HE000162	55	204	Caucasotachea	vindobonensis	Korábek O.	2016	shell	Bosnia and Herzegovina: Rep. Srpska: Podnovlje	44.9410°N 18.1197°E	NMP	P6M 29895	CV119	MK482806	MK482980					Korábek et al. 2020
HE000163	11	42	Helix	pomatia	Korábek O.	2016	shell	Bosnia and Herzegovina: Rep. Srpska: S of Kozarac	44.9551°N 16.8393°E	NMP	P6M 29214	P_839	MF943813	MF944050					Korábek et al. 2018a
HE000164	11	42	Helix	pomatia	Korábek O.	2016	shell	Bosnia and Herzegovina: Rep. Srpska: S of Kozarac	44.9551°N 16.8393°E	NMP	P6M 29214	P_876	MF943909	MF944076					Korábek et al. 2018a
HE000165	55	204	Caucasotachea	vindobonensis	Korábek O.	2016	shell	Bosnia and Herzegovina: Rep. Srpska: S of Kozarac	44.9551°N 16.8393°E	NMP	P6M 29896	CV77	MK482869	MK483043					Korábek et al. 2020
HE000166	55	204	Caucasotachea	vindobonensis	Korábek O.	2016	shell	Bosnia and Herzegovina: Rep. Srpska: S of Kozarac	44.9551°N 16.8393°E	NMP	P6M 29896	CV78	MK482870	MK483044					Korábek et al. 2020
HE000167	11	42	Helix	pomatia	Korábek O.	2016	shell	Bosnia and Herzegovina: Rep. Srpska: Srbac	45.0901°N 17.5232°E	NMP	P6M 29215	P_852	MF943818	MF944055					Korábek et al. 2018a
HE000168	11	42	Helix	pomatia	Korábek O.	2016	shell	Bosnia and Herzegovina: Rep. Srpska: Srbac	45.0901°N 17.5232°E	NMP	P6M 29215	P_880	MF943914						Korábek et al. 2018a
HE000169	55	204	Caucasotachea	vindobonensis	Korábek O.	2016	shell	Bosnia and Herzegovina: Rep. Srpska: Srbac	45.0901°N 17.5232°E	NMP	P6M 29897	CV71	MK482863	MK483037					Korábek et al. 2020
HE000170	55	204	Caucasotachea	vindobonensis	Korábek O.	2016	shell	Bosnia and Herzegovina: Rep. Srpska: Srbac	45.0901°N 17.5232°E	NMP	P6M 29897	CV72	MK482864	MK483038					Korábek et al. 2020
HE000171	11	42	Helix	pomatia	Korábek O.	2014	shell	Bosnia and Herzegovina: Republika Srpska: Nova Ves	45.0791°N 17.7431°E	SMF	346023	P_308	KT211790						Korábek et al. 2016
HE000172	11	42	Helix	pomatia	Korábek O.	2015	shell	Bosnia and Herzegovina: Republika Srpska: Volarica stream near Šipovo	44.2950°N 17.1192°E	NMP	P6M 29216	P_717	MF943673						Korábek et al. 2018a
HE000173	11	42	Helix	pomatia	Korábek O.	2015	shell	Bosnia and Herzegovina: Republika Srpska: Volarica stream near Šipovo	44.2950°N 17.1192°E	NMP	P6M 29216	P_719	MF943873						Korábek et al. 2018a
HE000174	8	26	Helix	dormitoris	Korábek O.	2013	shell	Bosnia and Herzegovina: Rudo on Lim river	43.62°N 19.38°E	NHMW	43817	DT12	Korábek et al. 2015, Supplementary file S2						Korábek et al. 2015	geographic coordinates only indicative
HE000175	8	26	Helix	cf. pomatia	Korábek O.	2013	origin&shell	Bosnia and Herzegovina: Sarajevo, ul. Mlinicki	43.8597°N 18.4347°E	no voucher		VL3xDT5_	KF823040	KF823076					Korábek et al. 2014
HE000176	8	26	Helix	cf. pomatia	Korábek O.	2013	origin&shell	Bosnia and Herzegovina: Sarajevo, ul. Mlinicki	43.8597°N 18.4347°E	no voucher		VL4	MW443228						this study
HE000177	24	89	Helix	lucorum	Korábek O.	2014	shell	Bulgaria: Blagoevgrad Prov.: General Todorov	41.4558°N 23.2692°E	NMP	P6M 30019	LC60	MG709069						Korábek et al. 2018b
HE000178	1	1	Helix	philibinensis	Korábek O.	2013	shell	Bulgaria: Blagoevgrad Prov.: Kalimantsi env., Pešternik, limestone gorge on W slope of Sveštenik	41.45°N 23.45°E	NMBE	519950/2	PL3	KP072373						Korábek et al. 2015	geographic coordinates only indicative
HE000179	24	89	Helix	lucorum	Korábek O.	2014	shell	Bulgaria: Blagoevgrad Prov.: Melnik	41.5236°N 23.3950°E	NMP	P6M 30020	LC62	MG709071						Korábek et al. 2018b
HE000180	25	98	Helix	pomacella	Korábek O.	2013	shell	Bulgaria: Burgas, near airport	42.5707°N 27.5374°E	NMBE	505544	PC1	KP072370	KP072174					Korábek et al. 2015
HE000181	5	13	Helix	thessalica	Korábek O.	2015	shell	Bulgaria: Gabrovo env., top of Stoletov peak by Shipka pass	42.7464°N 25.3221°E	SMF	346090	P_12	KT211730	KT211702					Korábek et al. 2016
HE000182	2	2	Helix	albescens	Korábek O.	2013	shell	Bulgaria: Haskovo Prov.: Ivaylovgrad, Arda hut	41.63°N 25.98°E	NMBE	505484	AL2	KP072202	KP072120					Korábek et al. 2015	geographic coordinates only indicative, the locality was eventually identified as “хижа Арда” south of Dabovets on the shore of the Ivaylovgrad Reservoir
HE000183	5	16	Helix	thessalica	Korábek O.	2015	shell	Bulgaria: Kardzhali Prov.: Dzhebel	41.5°N 25.3°E	NMBE	23349/2	PO50	KP072379			KT211685			Korábek et al. 2015, Korábek et al. 2016	geographic coordinates only indicative
HE000184	5	13	Helix	thessalica	Korábek O.	2015	shell	Bulgaria: Lovech Prov.: Brestnitsa env., gas station	43.0647°N 24.1394°E	SMF	346091	P_25	KT211771						Korábek et al. 2016
HE000185	55	203	Caucasotachea	vindobonensis	Korábek O.	2013	shell	Bulgaria: Lovech Prov.: Brestnitsa env., petrol station	43.0647°N 24.1394°E	no voucher		CV6	MK482852	MK483026					Korábek et al. 2020
HE000186	55	205	Caucasotachea	vindobonensis	Korábek O.	2013	shell	Bulgaria: Lovech Prov.: Ostrets	42.8011°N 24.9803°E	NMP	P6M 29899	CV13	MK482812	MK482986					Korábek et al. 2020
HE000187	5	13	Helix	thessalica	Korábek O.	2015	shell	Bulgaria: Lovech/Gabrovo Prov.: Kravenik env.	42.8392°N 24.9803°E	SMF	346092	PO84	KT211838	KT211716					Korábek et al. 2016
HE000188	11	38	Helix	pomatia	Korábek O.	2014	shell	Bulgaria: Pleven Prov.: Lozitsa	43.6047°N 25.0008°E	SMF	346024	P_259	KT211779						Korábek et al. 2016
HE000189	11	36	Helix	pomatia	Korábek O.	2014	shell	Bulgaria: Pleven Prov.: Lozitsa	43.6047°N 25.0008°E	SMF	346024	P_330	MF943855						Korábek et al. 2018a
HE000190	5	14	Helix	thessalica	Korábek O.	2017	shell&genital	Bulgaria: Plovdiv Prov.: W of Dobrostan, Chyzha Martsiganitsa	41.8992°N 24.8811°E	NMP	P6M 30140	TH23	MK482907						Korábek et al. 2020
HE000191	5	14	Helix	thessalica	Korábek O.	2017	shell&genital	Bulgaria: Plovdiv Prov.: W of Dobrostan, Chyzha Martsiganitsa	41.8992°N 24.8811°E	NMP	P6M 30140	TH24	MK482908						Korábek et al. 2020
HE000192	5	14	Helix	thessalica	Korábek O.	2017	shell&genital	Bulgaria: Smolyan Prov.: Chyzha Skalnite Mostove W of Chudnite mostove	41.8203°N 24.5722°E	NMP	P6M 30141	TH22	MK482906	MK483070					Korábek et al. 2020
HE000193	24	89	Helix	lucorum	Korábek O.	2013	shell	Bulgaria: Stara Zagora Prov.: Shipka env., near Thrakish tomb	42.7050°N 25.3511°E	no voucher		LC70	MG709076	MG709118					Korábek et al. 2018b
HE000194	5	14	Helix	thessalica	Korábek O.	2015	shell	Bulgaria: Stara Zagora Prov.: Shipka env., near Thrakish tomb	42.7050°N 25.3511°E	SMF	346093	P_401	KT211809	KT211707		KT211682			Korábek et al. 2016
HE000195	55	205	Caucasotachea	vindobonensis	Korábek O.	2013	shell	Bulgaria: Stara Zagora Prov.: Zmejovo train station	42.5006°N 25.5956°E	NMP	P6M 29901	CV1	MK482782	MK482959					Korábek et al. 2020
HE000196	24	89	Helix	lucorum	Korábek O.	2014	shell	Bulgaria: Veliko Tarnovo, Pliska ulitsa 1	43.0785°N 25.6136°E	NMP	P6M 30021	LC92	MG709087						Korábek et al. 2018b
HE000197	11	38	Helix	pomatia	Korábek O.	2014	shell	Bulgaria: Vratsa Prov.: Iskar valley, parking place at Cherepishki Manastir	43.0939°N 23.6155°E	NMBE	519954/3	P_954	KT211818						Korábek et al. 2016
HE000198	10	35	Helix	secernenda	Korábek O.	2013	shell	Croatia: Biokovo, road to National park	43.3448°N 17.0617°E	SMF	342501	SC1	KF823057	KF823093					Korábek et al. 2014
HE000199	10	35	Helix	secernenda	Korábek O.	2013	shell	Croatia: Brač, Uvala Smrka	43.2997°N 16.5111°E	SMF	342499	SC3xSC5_	KP072386						Korábek et al. 2015
HE000200	11	36	Helix	pomatia	Korábek O.	2016	shell	Croatia: Brod-Posavina county: Okučani	45.2553°N 17.2111°E	NMP	P6M 29219	P_855	MF943819						Korábek et al. 2018a
HE000201	11	36	Helix	pomatia	Korábek O.	2016	shell	Croatia: Brod-Posavina county: Okučani	45.2553°N 17.2111°E	NMP	P6M 29219	P_513	MF943915						Korábek et al. 2018a
HE000202	55	204	Caucasotachea	vindobonensis	Korábek O.	2016	shell	Croatia: Brod-Posavina county: Okučani	45.2553°N 17.2111°E	NMP	P6M 29902	CV69	MK482860	MK483034					Korábek et al. 2020
HE000203	55	204	Caucasotachea	vindobonensis	Korábek O.	2016	shell	Croatia: Brod-Posavina county: Okučani	45.2553°N 17.2111°E	NMP	P6M 29902	CV70	MK482862	MK483036					Korábek et al. 2020
HE000204	11	36	Helix	pomatia	Korábek O.	2016	shell	Croatia: Brod-Posavina county: Rastušje	45.2092°N 18.0331°E	NMP	P6M 29220	P_817	MF943789						Korábek et al. 2018a
HE000205	11	36	Helix	pomatia	Korábek O.	2016	shell	Croatia: Brod-Posavina county: Rastušje	45.2092°N 18.0331°E	NMP	P6M 29220	P_514	MF943894						Korábek et al. 2018a
HE000206	55	204	Caucasotachea	vindobonensis	Korábek O.	2016	shell	Croatia: Brod-Posavina county: Rastušje	45.2092°N 18.0331°E	no voucher		CV113	MK482800						Korábek et al. 2020
HE000207	10	35	Helix	secernenda	Korábek O.	2015	shell	Croatia: Dubrovačko-neretvanska županija: Brašina env.	42.6354°N 18.2061°E	SMF	360463	SC24	MW443488						this study
HE000208	10	35	Helix	secernenda	Korábek O.	2013	shell	Croatia: Split-Dalmatia County: Gata near Omiš	43.47°N 16.70°E	SMF	360466	SC18	MW443489						this study	geographic coordinates only indicative
HE000209	14	48	Helix	cincta	Korábek O.	2013	shell	Croatia: Istria County: Motovun, by road	45.3336°N 13.8261°E	SMF	346019	CN31	KT211721	KT211697		KT211674			Korábek et al. 2016
HE000210	14	48	Helix	cincta	Korábek O.	2013	shell	Croatia: Istria County: Pula, Fratarski Otok	44.83°N 13.84°E	SMF	342453	CN7	KP072408						Korábek et al. 2014	geographic coordinates only indicative
HE000211	11	38	Helix	pomatia	Korábek O.	2015	shell	Croatia: Istria County: Račja Vas	45.4279°N 14.0954°E	NMP	P6M 29225	P_440	MF943560						Korábek et al. 2018a
HE000212	11	38	Helix	pomatia	Korábek O.	2015	shell	Croatia: Karlovac County: between Tušilović and Brezova Glava	45.3877°N 15.6137°E	NMP	P6M 29218	P_439	MF943559						Korábek et al. 2018a
HE000213	14	48	Helix	cincta	Korábek O.	2013	shell	Croatia: Krk: Rudine	45.1882°N 14.6126°E	NMBE	565430	CN30	MT949707	MT947394					Korábek et al. 2021
HE000214	11	42	Helix	pomatia	Korábek O.	2015	shell	Croatia: Lika-Senj County: Mala Kapela, old road between Jezerane and Modruš	45.0907°N 15.2138°E	NMP	P6M 29222	P_431	MF943551						Korábek et al. 2018a
HE000215	11	42	Helix	pomatia	Korábek O.	2013	shell	Croatia: Lika-Senj county: Plitvička jezera	44.88°N 15.62°E	SMF	346026	PO80	KT211834	KT211713					Korábek et al. 2016	geographic coordinates only indicative
HE000216	11	42	Helix	pomatia	Korábek O.	2013	shell	Croatia: Lika-Senj County: road E65 near Žuta Lokva	44.9667°N 15.0550°E	NMBE	505533	PO2	KP072376						Korábek et al. 2015
HE000217	11	36	Helix	pomatia	Korábek O.	2015	shell	Croatia: Međimurje County: by Mura river east of Goričan	46.389°N 16.721°E	NMP	P6M 30286	P_451	MF943546						Korábek et al. 2018a
HE000218	11	36	Helix	pomatia	Korábek O.	2016	shell	Croatia: Osijek-Baranja County: Malinovac env. in direction to Našice	45.6117°N 18.1390°E	NMP	P6M 29223	P_826	MF943787	MF944037					Korábek et al. 2018a
HE000219	11	36	Helix	pomatia	Korábek O.	2016	shell	Croatia: Osijek-Baranja/Požega-Slavonia county: pass between Gradac Našički and Vukojevica	45.4240°N 17.9814°E	NMP	P6M 29224	P_824	MF943788	MF944038					Korábek et al. 2018a
HE000220	14	48	Helix	cincta	Korábek O.	2014	shell	Croatia: Pag: Košljun	44.3995°N 15.0687°E	NMBE	565429	CN38	MT949708	MT947395					Korábek et al. 2021
HE000221	10	35	Helix	secernenda	Korábek O.	2015	shell	Croatia: Pelješac peninsula: Ston, town walls	42.8413°N 17.6970°E	SMF	360464	SC22	MW443490						this study
HE000222	11	41	Helix	pomatia	Korábek O.	2013	shell	Croatia: Primorje-Gorski Kotar County: Banovina	45.2887°N 14.7200°E	no voucher		PO47	MF943328	MF943948					Korábek et al. 2018a
HE000223	11	41	Helix	pomatia	Korábek O.	2015	shell	Croatia: Primorje-Gorski Kotar County: between Delnica and Crni Lug	45.4108°N 14.7502°E	NMP	P6M 29217	P_438	MF943558						Korábek et al. 2018a
HE000224	10	35	Helix	secernenda	Korábek O.	2013	shell	Croatia: Primorje-Gorski Kotar: Novi Vinodolski	45.1345°N 14.7646°E	SMF	360465	SC14	MW443491	MW443891					this study
HE000225	11	36	Helix	pomatia	Korábek O.	2013	shell	Croatia: Sisak-Moslavina County: Gornja Jelenska	45.5870°N 16.6729°E	SMF	346025	PO32	KT211825	MF943952					Korábek et al. 2016
HE000226	10	35	Helix	secernenda	Korábek O.	2013	shell	Croatia: Sjeverni Velebit, E of Jablanac	44.7062°N 14.9591°E	NMP	P6M 30331	SC15	KP072383	KP072086					Korábek et al. 2015
HE000227	11	42	Helix	pomatia	Korábek O.	2013	shell	Croatia: Split-Dalmatia County: Vrlika, valley of the Cetina river	43.91°N 16.40°E	no voucher		P_405	MW443492						this study	geographic coordinates only indicative
HE000228	11	36	Helix	pomatia	Korábek O.	2016	shell	Croatia: Varaždin county: road to Ludbreg near Zamlaka	46.2807°N 16.5081°E	NMP	P6M 29226	P_851	MF943822	MF944057					Korábek et al. 2018a
HE000229	10	35	Helix	secernenda	Korábek O.	2013	shell	Croatia: Zadar County, Paklenica, NE of Seline	44.2951°N 15.5191°E	SMF	360467	SC13	MW443493	MW443892					this study
HE000230	55	204	Caucasotachea	vindobonensis	Korábek O.	2014	shell	Croatia: Zagreb County: highway A1 near Donji Desinec	45.6615°N 15.7130°E	NMP	P6M 29903	CV30	MK482824	MK482998					Korábek et al. 2020
HE000231	11	36	Helix	pomatia	Korábek O.	2016	shell	Croatia: Zagreb county: Komin	46.0020°N 16.2815°E	NMP	P6M 29227	P_854	MF943821						Korábek et al. 2018a
HE000232	11	36	Helix	pomatia	Korábek O.	2016	shell	Croatia: Zagreb county: Šumečani	45.7237°N 16.5066°E	NMP	P6M 29228	P_848	MF943820	MF944056					Korábek et al. 2018a
HE000233	11	36	Helix	pomatia	Korábek O.	2016	shell	Croatia: Zagreb county: Šumečani	45.7237°N 16.5066°E	NMP	P6M 29228	P_511	MF943916						Korábek et al. 2018a
HE000234	32	118	Helix	nucula	Korábek O.	2013	shell	Cyprus: Choirokoitia	34.7969°N 33.3428°E	SMF	342479	CH1	KP072304						Korábek et al. 2015
HE000235	32	118	Helix	nucula	Korábek O.	2013	mtDNA	Cyprus: Famagusta District, Ayia Napa	34.9833°N 34.0000°E	coll. Neiber M. T.		217	KP072197	KP072104					Korábek et al. 2015
HE000236	32	118	Helix	nucula	Korábek O.	2013	shell	Cyprus: Kato Drys	34.8494°N 33.3039°E	SMF	342480	CH2	KP072305						Korábek et al. 2015
HE000237	32	118	Helix	nucula	Korábek O.	2013	shell	Cyprus: Kato Drys	34.8494°N 33.3039°E	SMF	342480	CH4	KP072307	KP072103					Korábek et al. 2015
HE000238	14	48	Helix	cincta	Korábek O.	2013	shell	Cyprus: Kato Drys and Vavla	34.8494°N 33.3039°E	SMF	342448	CN16	KP072269						Korábek et al. 2015
HE000239	14	48	Helix	cincta	Korábek O.	2013	shell	Cyprus: Kato Drys and Vavla	34.8494°N 33.3039°E	SMF	342448	CN17	KP072270	KP072112					Korábek et al. 2015
HE000240	32	118	Helix	nucula	Korábek O.	2013	shell	Cyprus: Kouklia, Aphrodite's temple	34.7072°N 32.5733°E	SMF	342481	CH3	KP072306	KP072102					Korábek et al. 2015
HE000241	32	120	Helix	nucula	Korábek O.	2013	shell	Cyprus: Ormidia	34.9878°N 33.7842°E	SMF	342482	NU20	KP072361	KP072101					Korábek et al. 2015
HE000242	14	48	Helix	cincta	Korábek O.	2013	shell	Cyprus: Protaras, Konnos Bay	34.9831°N 34.0697°E	SMF	342449	CN18	KP072271						Korábek et al. 2015
HE000243	14	48	Helix	cincta	Korábek O.	2013	shell	Cyprus: Protaras, Konnos Bay	34.9831°N 34.0697°E	SMF	342449	CN25	KP072272	KP072111					Korábek et al. 2015
HE000244	42	142	Levantina	bellardii	Korábek O.	2013	shell	Cyprus: S of Kyrenia (Girne), Hilarion Kalesi	35.3131°N 33.2792°E	SMF	342525	LV10	KP072333	KP072182					Korábek et al. 2015
HE000245	11	36	Helix	pomatia	Korábek O.	2014	shell	Czechia: Alexovice, Pekárka	49.0889°N 16.3391°E	SMF	346027	P_116	KT211729						Korábek et al. 2016
HE000246	11	36	Helix	pomatia	Korábek O.	2014	shell	Czechia: Alexovice, Pekárka	49.0889°N 16.3391°E	SMF	346027	P_209	KT211741						Korábek et al. 2016
HE000247	11	42	Helix	pomatia	Korábek O.	2014	shell	Czechia: Alexovice, Pekárka	49.0889°N 16.3391°E	SMF	346027	P_396	KT211804	MF944064					Korábek et al. 2016, Korábek et al. 2018a
HE000248	11	42	Helix	pomatia	Korábek O.	2014	shell	Czechia: Alexovice, Pekárka	49.0889°N 16.3391°E	SMF	346027	P_397	KT211805						Korábek et al. 2016
HE000249	11	36	Helix	pomatia	Korábek O.	2014	shell	Czechia: Alexovice, Pekárka	49.0889°N 16.3391°E	SMF	346027	P_398	KT211806						Korábek et al. 2016
HE000250	5	13	Helix	thessalica	Korábek O.	2015	shell	Czechia: Alexovice, Pekárka	49.0889°N 16.3391°E	SMF	346094	P_110	KT211728	KT211701					Korábek et al. 2016
HE000251	11	36	Helix	thessalica	Korábek O.	2015	shell	Czechia: Alexovice, Pekárka	49.0889°N 16.3391°E	SMF	346094	P_294	KT211785						Korábek et al. 2016
HE000252	5	13	Helix	thessalica	Korábek O.	2015	shell	Czechia: Alexovice, Pekárka	49.0889°N 16.3391°E	SMF	346094	P_399	KT211807						Korábek et al. 2016
HE000253	11	36	Helix	pomatia	Korábek O.	2014	shell	Czechia: Andělská Hora	50.2053°N 12.9642°E	NMP	P6M 29230	P_370	MF943444						Korábek et al. 2018a
HE000254	11	36	Helix	pomatia	Korábek O.	2014	shell	Czechia: Bečov u Mostu, Chloumek	50.4556°N 13.7025°E	NMP	P6M 29233	P_187	MF943449						Korábek et al. 2018a
HE000255	11	36	Helix	pomatia	Korábek O.	2014	shell	Czechia: Benešov nad Černou, Dálavy	48.7247°N 14.5958°E	NMP	P6M 29234	P_189	MF943476						Korábek et al. 2018a
HE000256	11	36	Helix	pomatia	Korábek O.	2014	shell	Czechia: between Hrochův Týnec and Skalice	49.9560°N 15.9262°E	NMP	P6M 29236	P_179	MF943413						Korábek et al. 2018a
HE000257	5	13	Helix	thessalica	Korábek O.	2015	shell&genital	Czechia: between Letkovice and Řeznovice, below Malé Plachty	49.0924°N 16.3412°E	NMP	P6M 30143	TH2	MK482903						Korábek et al. 2020
HE000258	11	36	Helix	pomatia	Korábek O.	2014	shell	Czechia: between Měňany, Koněprusy and Vinařice	49.9061°N 14.0950°E	NMP	P6M 29238	P_145	MF943407						Korábek et al. 2018a
HE000259	11	36	Helix	pomatia	Korábek O.	2014	shell	Czechia: Bílá	49.4497°N 18.4661°E	NMP	P6M 29242	P_507	MF943505						Korábek et al. 2018a
HE000260	11	42	Helix	pomatia	Korábek O.	2014	shell	Czechia: Bílina, Kyselka	50.5417°N 13.7572°E	NMP	P6M 29244	P_113	MF943443						Korábek et al. 2018a
HE000261	11	36	Helix	pomatia	Korábek O.	2014	shell	Czechia: Blansko, Skalní mlýn	49.3633°N 16.7094°E	NMP	P6M 29246	P_155	MF943464						Korábek et al. 2018a
HE000262	11	36	Helix	pomatia	Korábek O.	2014	shell	Czechia: Borotice, Hubenov	49.7267°N 14.2911°E	NMP	P6M 29251	P_117	MF943408						Korábek et al. 2018a
HE000263	11	36	Helix	pomatia	Korábek O.	2014	shell	Czechia: Brdy, Na Hradci, between Hostomice and Dobříš	49.8117°N 14.1011°E	no voucher		P_202	MF943433						Korábek et al. 2018a
HE000264	11	42	Helix	pomatia	Korábek O.	2014	shell	Czechia: Brno, Stránská skála	49.1908°N 16.6753°E	no voucher		P_292	MF943542						Korábek et al. 2018a
HE000265	11	42	Helix	pomatia	Korábek O.	2014	shell	Czechia: Buchlovice env., road to Buchlov castle	49.1133°N 17.2973°E	NMP	P6M 29260	P_227	MF943514						Korábek et al. 2018a
HE000266	11	36	Helix	pomatia	Korábek O.	2013	shell	Czechia: Čáslav	49.9125°N 15.3881°E	SMF	342495	PO3	KF823051	KF823087					Korábek et al. 2014
HE000267	11	36	Helix	pomatia	Korábek O.	2014	shell	Czechia: Čelákovice	50.1661°N 14.7317°E	NMP	P6M 29264	P_107	MF943423						Korábek et al. 2018a
HE000268	55	205	Caucasotachea	vindobonensis	Korábek O.	2013	shell	Czechia: Central Bohemia Region: Čáslav, train station	49.9161°N 15.3953°E	NMP	P6M 29905	CV16	MK482814	MK482988					Korábek et al. 2020
HE000269	55	205	Caucasotachea	vindobonensis	Korábek O.	2014	shell	Czechia: Central Bohemia Region: Davle, railway	49.8928°N 14.4056°E	NMP	P6M 30481	CV34	MK482827	MK483001					Korábek et al. 2020
HE000270	55	203	Caucasotachea	vindobonensis	Korábek O.	2015	shell	Czechia: Central Bohemia: Mšeno, train station	50.4354°N 14.6420°E	NMP	P6M 29906	CV62	MK482855	MK483029					Korábek et al. 2020
HE000271	11	36	Helix	pomatia	Korábek O.	2014	shell	Czechia: Čertovy Schody quarry, floor of the part 2	49.9144°N 14.0561°E	NMP	P6M 29276	P_156	MF943467						Korábek et al. 2018a
HE000272	11	36	Helix	pomatia	Korábek O.	2014	shell	Czechia: Česká Lípa	50.6793°N 14.5272°E	NMP	P6M 29277	P_136	MF943414						Korábek et al. 2018a
HE000273	11	36	Helix	pomatia	Korábek O.	2014	shell	Czechia: Česká Skalice, Rozkoš	50.3883°N 16.0508°E	NMP	P6M 29278	P_201	MF943420						Korábek et al. 2018a
HE000274	11	36	Helix	pomatia	Korábek O.	2014	shell	Czechia: České Budějovice, Staré Hodějovice	48.9458°N 14.5218°E	NMP	P6M 29280	P_127	MF943382						Korábek et al. 2018a
HE000275	11	36	Helix	pomatia	Korábek O.	2014	shell	Czechia: České Budějovice, Vrbenské rybníky	49.0005°N 14.4410°E	no voucher		P_118	MF943417						Korábek et al. 2018a
HE000276	11	36	Helix	pomatia	Korábek O.	2015	shell	Czechia: Český Krumlov env., Vyšenské kopce	48.82°N 14.30°E	NMP	P6M 29282	P_349	MF943680						Korábek et al. 2018a
HE000277	11	36	Helix	pomatia	Korábek O.	2014	shell	Czechia: Chlum, former bridge over Teplá Vltava	48.8621°N 13.8973°E	NMP	P6M 29285	P_274	MF943520						Korábek et al. 2018a
HE000278	11	36	Helix	pomatia	Korábek O.	2014	shell	Czechia: Chotovice	50.7417°N 14.5522°E	NMP	P6M 29286	P_39	MF943367						Korábek et al. 2018a
HE000279	11	36	Helix	pomatia	Korábek O.	2014	shell	Czechia: Choustník	49.3342°N 14.8381°E	NMP	P6M 29287	P_423	MF943388						Korábek et al. 2018a
HE000280	11	42	Helix	pomatia	Korábek O.	2014	shell	Czechia: Ctiněves	50.3785°N 14.3067°E	NMP	P6M 29294	P_169	MF943474						Korábek et al. 2018a
HE000281	5	13	Helix	thessalica	Korábek O.	2016	shell&genital	Czechia: Čučice, margin of a meadow above Čučický brook	49.1361°N 16.2800°E	NMP	P6M 30144	TH12	MK482897						Korábek et al. 2020
HE000282	11	36	Helix	pomatia	Korábek O.	2014	shell	Czechia: Dívčice	49.1049°N 14.3021°E	NMP	P6M 29300	P_125	MF943404						Korábek et al. 2018a
HE000283	11	36	Helix	pomatia	Korábek O.	2014	shell	Czechia: Dlouhá Třebová	49.95°N 16.42°E	no voucher		P_142	MF943387						Korábek et al. 2018a	geographic coordinates only indicative
HE000284	11	42	Helix	pomatia	Korábek O.	2014	shell	Czechia: Dolní Krupá	49.6599°N 15.6074°E	NMP	P6M 29308	P_104	MF943439						Korábek et al. 2018a
HE000285	11	42	Helix	pomatia	Korábek O.	2013	shell	Czechia: Dolní Věstonice env., NW slope of Děvín	48.8750°N 16.6556°E	SMF	346028	PO87	KT211839	KT211717					Korábek et al. 2016
HE000286	11	42	Helix	pomatia	Korábek O.	2013	shell	Czechia: Dolní Věstonice env., NW slope of Děvín	48.8750°N 16.6556°E	SMF	346028	P_34	KT211802						Korábek et al. 2016
HE000287	11	42	Helix	pomatia	Korábek O.	2013	shell	Czechia: Dolní Věstonice env., NW slope of Děvín	48.8750°N 16.6556°E	SMF	346028	P_35	KT211803						Korábek et al. 2016
HE000288	11	42	Helix	pomatia	Korábek O.	2014	shell	Czechia: Domašov nad Bystřicí	49.7367°N 17.4406°E	SMF	346029	P_191	KT211738						Korábek et al. 2016
HE000289	11	36	Helix	pomatia	Korábek O.	2014	shell	Czechia: Drevníky	49.7197°N 14.2747°E	NMP	P6M 29312	P_128	MF943434						Korábek et al. 2018a
HE000290	11	36	Helix	pomatia	Korábek O.	2014	shell	Czechia: Dvůr Králové nad Labem	50.4308°N 15.8072°E	NMP	P6M 29314	P_111	MF943447						Korábek et al. 2018a
HE000291	11	36	Helix	pomatia	Korábek O.	2014	shell	Czechia: Džbánov by Vysoké Mýto	49.9217°N 16.1622°E	NMP	P6M 29315	P_424	MF943460						Korábek et al. 2018a
HE000292	11	36	Helix	pomatia	Korábek O.	2014	shell	Czechia: floodplain forest of Dyje near Břeclav	48.7956°N 16.8459°E	no voucher		P_164	MF943466						Korábek et al. 2018a
HE000293	11	36	Helix	pomatia	Korábek O.	2014	shell	Czechia: Františkovy Lázně	50.1143°N 12.3500°E	NMP	P6M 29319	P_502	MF943510						Korábek et al. 2018a
HE000294	11	42	Helix	pomatia	Korábek O.	2014	shell	Czechia: Havlíčkův Brod	49.6000°N 15.5840°E	NMP	P6M 29321	P_197	MF943380						Korábek et al. 2018a
HE000295	11	36	Helix	pomatia	Korábek O.	2014	shell	Czechia: Havraníky	48.8092°N 16.0075°E	NMP	P6M 29322	P_140	MF943424						Korábek et al. 2018a
HE000296	11	42	Helix	pomatia	Korábek O.	2014	shell	Czechia: Heroltice near Tišnov	49.3056°N 16.4164°E	SMF	346030	P_298	KT211787	MF943984					Korábek et al. 2016, Korábek et al. 2018a
HE000297	11	36	Helix	pomatia	Korábek O.	2014	shell	Czechia: Hnojnice, NPP Kamenná Slunce	50.4347°N 13.8856°E	NMP	P6M 29324	P_115	MF943450						Korábek et al. 2018a
HE000298	11	36	Helix	pomatia	Korábek O.	2014	shell	Czechia: Holany	50.6211°N 14.4958°E	NMP	P6M 29325	P_112	MF943425						Korábek et al. 2018a
HE000299	11	42	Helix	pomatia	Korábek O.	2014	shell	Czechia: Hořice na Šumavě, Skláře	48.7889°N 14.1879°E	NMP	P6M 29327	P_131	MF943405						Korábek et al. 2018a
HE000300	11	36	Helix	pomatia	Korábek O.	2014	shell	Czechia: Horní Bukovina	50.5397°N 14.9211°E	NMP	P6M 29328	P_427	MF943389						Korábek et al. 2018a
HE000301	11	36	Helix	pomatia	Korábek O.	2014	shell	Czechia: Horní Bukovina	50.5397°N 14.9211°E	NMP	P6M 29328	P_504	MF943838						Korábek et al. 2018a
HE000302	11	36	Helix	pomatia	Korábek O.	2014	shell	Czechia: Horní Hrad, Hauenštejn	50.3461°N 13.0164°E	no voucher		P_192	MF943456						Korábek et al. 2018a
HE000303	11	36	Helix	pomatia	Korábek O.	2014	shell	Czechia: Horní Hrad, Hauenštejn	50.3461°N 13.0164°E	no voucher		P_366	MF943842						Korábek et al. 2018a
HE000304	11	36	Helix	pomatia	Korábek O.	2014	shell	Czechia: Hřiměždice	49.6853°N 14.2733°E	NMP	P6M 29331	P_367	MF943409						Korábek et al. 2018a
HE000305	55	205	Caucasotachea	vindobonensis	Korábek O.	2014	shell	Czechia: Hustopeče	48.9343°N 16.7407°E	no voucher		CP43	MK482767	MK482944					Korábek et al. 2020
HE000306	11	36	Helix	thessalica	Korábek O.	2015	shell&genital	Czechia: Ivančice, Letkovice, western end	49.0948°N 16.3479°E	NMP	P6M 30145	TH4	MW443494						this study
HE000307	11	36	Helix	pomatia	Korábek O.	2015	shell	Czechia: Ivančice, rocks by railway to Ivančice	49.0994°N 16.3644°E	NMP	P6M 29339	P_615	MF943594						Korábek et al. 2018a
HE000308	11	36	Helix	pomatia	Korábek O.	2014	shell	Czechia: Janov (Bruntál county)	50.2456°N 17.4822°E	NMP	P6M 29341	P_503	MF943504						Korábek et al. 2018a
HE000309	11	36	Helix	pomatia	Korábek O.	2014	shell	Czechia: Jestřebí	50.6064°N 14.5811°E	NMP	P6M 29342	P_41	MF943366						Korábek et al. 2018a
HE000310	11	36	Helix	pomatia	Korábek O.	2014	shell	Czechia: Jindřichův Hradec	49.1344°N 14.9969°E	NMP	P6M 29345	P_109	MF943381						Korábek et al. 2018a
HE000311	11	42	Helix	pomatia	Korábek O.	2014	shell	Czechia: Karlštejn env., Bubovické vodopády	49.9483°N 14.1539°E	NMP	P6M 29347	P_180	MF943402						Korábek et al. 2018a
HE000312	11	42	Helix	pomatia	Korábek O.	2013	shell	Czechia: Karlštejn, locality A	49.9356°N 14.1658°E	SMF	346031	PO81	KT211835	KT211714		KT211686			Korábek et al. 2016
HE000313	11	36	Helix	pomatia	Korábek O.	2013	shell	Czechia: Karlštejn, locality B	49.9342°N 14.1719°E	NMP	P6M 29266	P_22	MF943341						Korábek et al. 2018a
HE000314	11	36	Helix	pomatia	Korábek O.	2013	shell	Czechia: Karlštejn, locality B	49.9342°N 14.1719°E	NMP	P6M 29266	P_23	MF943833						Korábek et al. 2018a
HE000315	11	36	Helix	pomatia	Korábek O.	2014	shell	Czechia: Karviná, Olšový pond	49.8728°N 18.5050°E	NMP	P6M 29348	P_163	MF943457						Korábek et al. 2018a
HE000316	11	36	Helix	pomatia	Korábek O.	2014	shell	Czechia: Kasejovice, Přebudov	49.4950°N 13.6953°E	NMP	P6M 29349	P_124	MF943437						Korábek et al. 2018a
HE000317	11	36	Helix	pomatia	Korábek O.	2014	shell	Czechia: Kdyně, Němčice, Nový Herštejn (PR Herštýn)	49.4147°N 13.0653°E	NMP	P6M 29350	P_200	MF943446						Korábek et al. 2018a
HE000318	55	205	Caucasotachea	vindobonensis	Korábek O.	2016	shell	Czechia: Ketkovice env., Levnov castle, slope above Oslava river	49.1383°N 16.2439°E	NMP	P6M 29907	CV63	MK482856	MK483030					Korábek et al. 2020
HE000319	11	42	Helix	pomatia	Korábek O.	2014	shell	Czechia: Kladno, Vrapice	50.1678°N 14.1667°E	NMP	P6M 29352	P_122	MF943418						Korábek et al. 2018a
HE000320	11	42	Helix	pomatia	Korábek O.	2014	shell	Czechia: Klapý, Házmburk castle	50.4342°N 14.0144°E	NMP	P6M 29353	P_194	MF943482						Korábek et al. 2018a
HE000321	11	36	Helix	pomatia	Korábek O.	2014	shell	Czechia: Klečůvka	49.2225°N 17.7811°E	NMP	P6M 29359	P_157	MF943477						Korábek et al. 2018a
HE000322	11	36	Helix	pomatia	Korábek O.	2013	shell	Czechia: Klentnice env., N slope of Stolová hora	48.8433°N 16.6386°E	NMP	P6M 29519	P_32	MF943354						Korábek et al. 2018a
HE000323	11	36	Helix	pomatia	Korábek O.	2013	shell	Czechia: Klentnice env., N slope of Stolová hora	48.8433°N 16.6386°E	NMP	P6M 29519	P_33	MF943836						Korábek et al. 2018a
HE000324	11	36	Helix	pomatia	Korábek O.	2014	shell	Czechia: Koberovy - Prosíčka	50.6322°N 15.2211°E	NMP	P6M 29361	P_102	MF943428						Korábek et al. 2018a
HE000325	11	42	Helix	pomatia	Korábek O.	2014	shell	Czechia: Kokořínský Důl	50.4311°N 14.5803°E	NMP	P6M 29363	P_130	MF943452						Korábek et al. 2018a
HE000326	11	36	Helix	pomatia	Korábek O.	2013	shell	Czechia: Kokořínský důl, Komorsko	50.3886°N 14.5378°E	NMP	P6M 29267	P_02	MF943356	MF943963					Korábek et al. 2018a
HE000327	11	36	Helix	pomatia	Korábek O.	2014	shell	Czechia: Kořenov, near Souš dam	50.7913°N 15.3325°E	NMP	P6M 29365	P_129	MF943430						Korábek et al. 2018a
HE000328	11	42	Helix	pomatia	Korábek O.	2014	shell	Czechia: Koroužné, NPP Švařec	49.5250°N 16.3508°E	NMP	P6M 29366	P_276	MF943400						Korábek et al. 2018a
HE000329	11	36	Helix	pomatia	Korábek O.	2014	shell	Czechia: Košťany, Střelná	50.6669°N 13.7486°E	NMP	P6M 29367	P_134	MF943442						Korábek et al. 2018a
HE000330	11	36	Helix	pomatia	Korábek O.	2014	shell	Czechia: Kostelec nad Vltavou, Žďákov bridge, right bank	49.5050°N 14.1881°E	NMP	P6M 29368	P_279	MF943391						Korábek et al. 2018a
HE000331	11	36	Helix	pomatia	Korábek O.	2014	shell	Czechia: Kounice	50.1111°N 14.8494°E	NMP	P6M 29370	P_144	MF943406						Korábek et al. 2018a
HE000332	11	36	Helix	pomatia	Korábek O.	2014	shell	Czechia: Kralovice u Rakovníka	49.9883°N 13.4886°E	no voucher		P_203	MF943469						Korábek et al. 2018a
HE000333	11	42	Helix	pomatia	Korábek O.	2014	shell	Czechia: Krejnice	49.2347°N 13.7169°E	NMP	P6M 29372	P_106	MF943453						Korábek et al. 2018a
HE000334	11	36	Helix	pomatia	Korábek O.	2014	shell	Czechia: Kruh	50.5581°N 15.4789°E	NMP	P6M 29374	P_167	MF943478						Korábek et al. 2018a
HE000335	11	36	Helix	pomatia	Korábek O.	2014	shell	Czechia: Lenešice, Nový Dvůr env.	50.3929°N 13.7492°E	NMP	P6M 29565	P_45	MF943363	MF943967					Korábek et al. 2018a
HE000336	11	36	Helix	pomatia	Korábek O.	2014	shell	Czechia: Letovice	49.5425°N 16.5700°E	NMP	P6M 29378	P_37	MF943365	MF943968					Korábek et al. 2018a
HE000337	55	203	Caucasotachea	vindobonensis	Korábek O.	2014	shell	Czechia: Levousy	50.3857°N 13.9782°E	NMP	P6M 29908	CV28	MK482821	MK482995					Korábek et al. 2020
HE000338	11	36	Helix	pomatia	Korábek O.	2013	shell	Czechia: Liberec Region: Kryštofovo Údolí, cemetery	50.7729°N 14.9338°E	SMF	346032	P_03	KT211724	KT211700		KT211679			Korábek et al. 2016
HE000339	11	36	Helix	pomatia	Korábek O.	2014	shell	Czechia: Lomnice nad Lužnicí, Smržov, dam of Dvořiště pond	49.0694°N 14.6766°E	NMP	P6M 29386	P_137	MF943445						Korábek et al. 2018a
HE000340	11	36	Helix	pomatia	Korábek O.	2014	shell	Czechia: Louňovice pod Blanikem	49.6377°N 14.8527°E	NMP	P6M 29388	P_188	MF943415						Korábek et al. 2018a
HE000341	11	36	Helix	pomatia	Korábek O.	2014	shell	Czechia: Makolusky	49.8392°N 15.0097°E	NMP	P6M 29396	P_199	MF943480						Korábek et al. 2018a
HE000342	11	42	Helix	pomatia	Korábek O.	2014	shell	Czechia: Malhostovice, near Malhostovická pecka	49.3267°N 16.4947°E	NMP	P6M 29399	P_297	MF943486						Korábek et al. 2018a
HE000343	11	36	Helix	pomatia	Korábek O.	2014	shell	Czechia: Mikulůvka	49.414°N 17.926°E	NMP	P6M 29404	P_351	MF943508						Korábek et al. 2018a	geographic coordinates only indicative
HE000344	11	42	Helix	pomatia	Korábek O.	2014	shell	Czechia: Milovice, Benátecký vrch	50.2356°N 14.8806°E	NMP	P6M 29269	P_153	MF943376						Korábek et al. 2018a
HE000345	11	36	Helix	pomatia	Korábek O.	2014	shell	Czechia: Miroslav, Miroslavské kopce, Markův kopec	48.940°N 16.316°E	NMP	P6M 29406	P_301	MF943526						Korábek et al. 2018a	geographic coordinates only indicative
HE000346	11	36	Helix	pomatia	Korábek O.	2014	shell	Czechia: Mladkov, radioactive spring "Pramen knížete Rostislava"	50.088°N 16.640°E	NMP	P6M 29408	P_342	MF943500						Korábek et al. 2018a	geographic coordinates only indicative
HE000347	11	42	Helix	pomatia	Korábek O.	2014	shell	Czechia: Mníšek	49.0292°N 14.9119°E	NMP	P6M 29409	P_147	MF943431						Korábek et al. 2018a
HE000348	55	203	Caucasotachea	vindobonensis	Korábek O.	2015	shell	Czechia: Mochov, railway	50.1385°N 14.7913°E	NMP	P6M 29909	CP7	MK482779	MK482956					Korábek et al. 2020
HE000349	11	36	Helix	pomatia	Korábek O.	2014	shell	Czechia: Mohelno, bridge over Jihlava	49.1004°N 16.1942°E	NMP	P6M 29411	P_108	MF943426						Korábek et al. 2018a
HE000350	11	36	Helix	pomatia	Korábek O.	2014	shell	Czechia: Mohelno, Mohelský mlýn	49.1034°N 16.1894°E	no voucher		P_121	KT211731						Korábek et al. 2016
HE000351	5	13	Helix	thessalica	Korábek O.	2015	shell	Czechia: Mohelno, Mohelský mlýn	49.1027°N 16.1895°E	no voucher		P_441	KT211816						Korábek et al. 2016
HE000352	11	36	Helix	pomatia	Korábek O.	2014	shell	Czechia: Moravská Třebová, Sušice	49.7773°N 16.6665°E	NMP	P6M 29413	P_323	MF943392	MF943972					Korábek et al. 2018a
HE000353	11	42	Helix	pomatia	Korábek O.	2014	shell	Czechia: Moravský Krumlov, locality C	49.0482°N 16.3191°E	SMF	346033	P_211	KT211743						Korábek et al. 2016
HE000354	11	42	Helix	pomatia	Korábek O.	2014	shell	Czechia: Muchova bouda, valley of Říčka near Brno	49.2217°N 16.7156°E	NMP	P6M 29418	P_178	MF943411						Korábek et al. 2018a
HE000355	11	36	Helix	pomatia	Korábek O.	2014	shell	Czechia: Nečín	49.7008°N 14.2375°E	NMP	P6M 29422	P_114	MF943410						Korábek et al. 2018a
HE000356	11	36	Helix	pomatia	Korábek O.	2014	shell	Czechia: Nový Drahov - Kateřina	50.1467°N 12.4013°E	NMP	P6M 29427	P_414	MF943509	MF943978					Korábek et al. 2018a
HE000357	11	42	Helix	pomatia	Korábek O.	2014	shell	Czechia: NPR Býčí skála	49.3075°N 16.6947°E	NMP	P6M 29432	P_275	MF943525						Korábek et al. 2018a
HE000358	11	42	Helix	pomatia	Korábek O.	2014	shell	Czechia: Ochoz u Brna, údolí Říčky, vývěr Říčky	49.2431°N 16.7414°E	NMP	P6M 29433	P_36	MF943370	MF943970					Korábek et al. 2018a
HE000359	11	42	Helix	pomatia	Korábek O.	2014	shell	Czechia: Ochoz u Tišnova	49.4264°N 16.3936°E	NMP	P6M 29434	P_162	MF943468						Korábek et al. 2018a
HE000360	11	36	Helix	pomatia	Korábek O.	2015	shell	Czechia: Olešnice near Častolovice	50.1375°N 16.1523°E	NMP	P6M 29436	P_806	MF943644	MF944004					Korábek et al. 2018a
HE000361	11	36	Helix	pomatia	Korábek O.	2014	shell	Czechia: Olomouc-Neředín, Úvoz	49.5900°N 17.2200°E	NMP	P6M 29437	P_154	MF943465						Korábek et al. 2018a
HE000362	11	36	Helix	pomatia	Korábek O.	2014	shell	Czechia: Ostrava, Landek	49.8683°N 18.2681°E	NMP	P6M 29445	P_170	MF943479						Korábek et al. 2018a
HE000363	11	36	Helix	pomatia	Korábek O.	2014	shell	Czechia: Ostrov by Blaník	49.6681°N 14.8519°E	NMP	P6M 29446	P_146	MF943436						Korábek et al. 2018a
HE000364	11	36	Helix	pomatia	Korábek O.	2014	shell	Czechia: Otavožaty	49.5722°N 15.2277°E	NMP	P6M 29447	P_101	MF943441						Korábek et al. 2018a
HE000365	11	42	Helix	pomatia	Korábek O.	2014	shell	Czechia: Pálava, near top of Děvín	48.8711°N 16.6547°E	SMF	346034	P_105	KT211727						Korábek et al. 2016
HE000366	11	36	Helix	pomatia	Korábek O.	2014	shell	Czechia: Písek, U Honzíčka	49.3133°N 14.1775°E	NMP	P6M 29456	P_149	MF943459						Korábek et al. 2018a
HE000367	11	42	Helix	pomatia	Korábek O.	2013	shell	Czechia: Podhradí, Lichnice castle	49.8794°N 15.5863°E	NMP	P6M 29452	P_29	MF943361	MF943966					Korábek et al. 2018a
HE000368	11	36	Helix	pomatia	Korábek O.	2014	shell	Czechia: Podivín	48.8156°N 16.8353°E	NMP	P6M 29522	P_173	MF943372						Korábek et al. 2018a
HE000369	11	42	Helix	pomatia	Korábek O.	2014	shell	Czechia: Pouzdřany	48.9400°N 16.6281°E	NMP	P6M 29464	P_126	MF943385						Korábek et al. 2018a
HE000370	11	42	Helix	pomatia	Korábek O.	2014	shell	Czechia: Pouzdřany, Kolby	48.9486°N 16.6439°E	NMP	P6M 29465	P_161	MF943384						Korábek et al. 2018a
HE000371	11	36	Helix	pomatia	Korábek O.	2015	shell	Czechia: Pozďatín	49.2284°N 16.0477°E	no voucher		P_802	MF943678	MF944011					Korábek et al. 2018a
HE000372	11	36	Helix	pomatia	Korábek O.	2014	shell	Czechia: Prachovice	49.8939°N 15.6314°E	NMP	P6M 29467	P_183	MF943481						Korábek et al. 2018a
HE000373	11	36	Helix	pomatia	Korábek O.	2014	shell	Czechia: Praha 5, Dívčí Hrady, Pod Děvínem	50.0560°N 14.4009°E	NMP	P6M 29470	P_184	MF943421						Korábek et al. 2018a
HE000374	24	89	Helix	lucorum	Korábek O.	2013	shell	Czechia: Praha, freight train station Žižkov	50.0833°N 14.4753°E	NMP	P6M 30022	LC18	KF823048	KF823084					Korábek et al. 2014
HE000375	11	36	Helix	pomatia	Korábek O.	2014	shell	Czechia: Praha, Hodkovičky	50.0175°N 14.4086°E	NMP	P6M 29471	P_177	MF943483						Korábek et al. 2018a
HE000376	11	42	Helix	pomatia	Korábek O.	2014	shell	Czechia: Praha, Motol hospital	50.0744°N 14.3528°E	no voucher		P_120	MF943435						Korábek et al. 2018a
HE000377	55	203	Caucasotachea	vindobonensis	Korábek O.	2015	shell	Czechia: Praha, Rohanský ostrov	50.0958°N 14.4472°E	NMP	P6M 29911	CP19	MK482742	MK482919					Korábek et al. 2020
HE000378	11	36	Helix	pomatia	Korábek O.	2014	shell	Czechia: Praha: Hlubočepy, Barrandovská	50.0355°N 14.4006°E	no voucher		P_123	MF943379						Korábek et al. 2018a
HE000379	11	42	Helix	pomatia	Korábek O.	2014	shell	Czechia: Praha: Žvahov, Děvín	50.0464°N 14.4033°E	NMP	P6M 29482	P_38	MF943371						Korábek et al. 2018a
HE000380	55	203	Caucasotachea	vindobonensis	Korábek O.	2013	shell	Czechia: Praha: Žvahov, Děvín	50.0464°N 14.4033°E	SMF	342534	CP2	KP072279	KP072187					Korábek et al. 2015
HE000381	11	36	Helix	pomatia	Korábek O.	2014	shell	Czechia: Provodín, Lysá Skála	50.6294°N 14.6081°E	NMP	P6M 29491	P_186	MF943451						Korábek et al. 2018a
HE000382	11	36	Helix	pomatia	Korábek O.	2014	shell	Czechia: Rabštejn nad Střelou	50.0467°N 13.2952°E	no voucher		P_190	MF943470						Korábek et al. 2018a
HE000383	11	36	Helix	pomatia	Korábek O.	2014	shell	Czechia: Raná, southern foot of Oblík	50.4069°N 13.8033°E	NMP	P6M 29493	P_103	MF943378						Korábek et al. 2018a
HE000384	11	36	Helix	pomatia	Korábek O.	2014	shell	Czechia: Raná, under the steepest part of southern slope of Oblík	50.4086°N 13.8058°E	NMP	P6M 29494	P_181	MF943416						Korábek et al. 2018a
HE000385	11	36	Helix	pomatia	Korábek O.	2014	shell	Czechia: Raškovice env., Skalická Morávka	49.6375°N 18.4419°E	NMP	P6M 29495	P_208	MF943485						Korábek et al. 2018a
HE000386	5	13	Helix	thessalica	Korábek O.	2015	shell&genital	Czechia: Řeznovice, by lower ponds	49.0897°N 16.3313°E	NMP	P6M 30147	TH3	MK482910						Korábek et al. 2020
HE000387	55	205	Caucasotachea	vindobonensis	Korábek O.	2015	shell	Czechia: Řeznovice, right bank by football field	49.0865°N 16.3194°E	NMP	P6M 29913	CP20	MK482743	MK482920					Korábek et al. 2020
HE000388	11	42	Helix	pomatia	Korábek O.	2015	shell	Czechia: Řeznovice, right bank by football playground	49.0865°N 16.3194°E	SMF	346175	P_616	MF943595						Korábek et al. 2018a
HE000389	5	13	Helix	thessalica	Korábek O.	2015	shell&genital	Czechia: Řeznovice, under rock outcrops	49.0877°N 16.3227°E	NMP	P6M 30148	TH1	MK482894						Korábek et al. 2020
HE000390	11	42	Helix	pomatia	Korábek O.	2013	shell	Czechia: Říp Mountain	50.3859°N 14.2886°E	no voucher		P_27	MF943360	MF943965					Korábek et al. 2018a
HE000391	11	36	Helix	pomatia	Korábek O.	2014	shell	Czechia: Říp, southern slope	50.3844°N 14.2878°E	NMP	P6M 29497	P_166	MF943473						Korábek et al. 2018a
HE000392	11	42	Helix	pomatia	Korábek O.	2014	shell	Czechia: Říp, western foot	50.3892°N 14.2850°E	NMP	P6M 29498	P_150	MF943472						Korábek et al. 2018a
HE000393	11	36	Helix	pomatia	Korábek O.	2013	shell	Czechia: road from Hardegg to Čížov	48.8572°N 15.8653°E	NMP	P6M 29523	P_20	MF943353						Korábek et al. 2018a
HE000394	11	36	Helix	pomatia	Korábek O.	2015	shell	Czechia: Rožmitál pod Třemšínem	49.60°N 13.87°E	no voucher		POM		MK400688	MK400679		MK400683		Korábek et al. 2019	geographic coordinates only indicative		MK400681	MK400687	MK400684	MK400686	MK400680	MK400685	MK400689	MK400682	MK400678
HE000395	11	36	Helix	pomatia	Korábek O.	2014	shell	Czechia: Rtyně nad Bílinou	50.6014°N 13.9228°E	NMP	P6M 29502	P_139	MF943448						Korábek et al. 2018a
HE000396	11	36	Helix	pomatia	Korábek O.	2016	shell	Czechia: Rychnov nad Kněžnou, Dlouhá Ves	50.15°N 16.3°E	NMP	P6M 29503	P_521	MW443495	MW443893					this study	geographic coordinates only indicative
HE000397	11	36	Helix	pomatia	Korábek O.	2014	shell	Czechia: Sázava	49.8861°N 14.8947°E	NMP	P6M 29506	P_160	MF943455						Korábek et al. 2018a
HE000398	11	36	Helix	pomatia	Korábek O.	2014	shell	Czechia: Šenov u Nového Jičína	49.6037°N 18.0001°E	NMP	P6M 29509	P_151	MF943458						Korábek et al. 2018a
HE000399	11	36	Helix	pomatia	Korábek O.	2014	shell	Czechia: Silůvky	49.107°N 16.459°E	NMP	P6M 29512	P_289	MF943527						Korábek et al. 2018a	geographic coordinates only indicative
HE000400	11	36	Helix	pomatia	Korábek O.	2014	shell	Czechia: Skryje - Čilá, bank of Berounka	49.97°N 13.75°E	NMP	P6M 29513	P_193	MF943412						Korábek et al. 2018a
HE000401	11	36	Helix	pomatia	Korábek O.	2014	shell	Czechia: Šlechtín	49.7910°N 15.2234°E	NMP	P6M 29514	P_369	MF943454						Korábek et al. 2018a
HE000402	11	42	Helix	pomatia	Korábek O.	2014	shell	Czechia: Šluknov, Císařská	50.9902°N 14.4148°E	NMP	P6M 29515	P_287	MF943393						Korábek et al. 2018a
HE000403	55	205	Caucasotachea	vindobonensis	Korábek O.	2013	shell	Czechia: South Moravian Region: Pouzdřany, Pouzdřanská step	48.9468°N 16.6434°E	no voucher		CV15	MK482813	MK482987					Korábek et al. 2020
HE000404	55	205	Caucasotachea	vindobonensis	Korábek O.	2013	shell	Czechia: South Moravian Region: Vranov nad Dyjí, Hamerské vrásy	48.8947°N 15.8208°E	NMP	P6M 29914	CV7	MK482861	MK483035					Korábek et al. 2020
HE000405	11	36	Helix	pomatia	Korábek O.	2014	shell	Czechia: southern slope of Lovoš, nature reserve	50.5278°N 14.0211°E	NMP	P6M 29526	P_40	MF943369	MF943969					Korábek et al. 2018a
HE000406	11	42	Helix	pomatia	Korábek O.	2014	shell	Czechia: Stará Ves near Rýmařov	49.9558°N 17.2381°E	NMP	P6M 29531	P_506	MF943501						Korábek et al. 2018a
HE000407	11	36	Helix	pomatia	Korábek O.	2014	shell	Czechia: Štíty	49.9583°N 16.7656°E	NMP	P6M 29537	P_168	MF943463						Korábek et al. 2018a
HE000408	11	36	Helix	pomatia	Korábek O.	2014	shell	Czechia: Štramberk, PP Kamenárka, abandoned quarry	49.5903°N 18.1229°E	NMP	P6M 29540	P_285	MF943519	MF943981					Korábek et al. 2018a
HE000409	11	36	Helix	pomatia	Korábek O.	2014	shell	Czechia: Střihov	50.2255°N 15.3677°E	NMP	P6M 29544	P_429	MF943390						Korábek et al. 2018a
HE000410	11	36	Helix	pomatia	Korábek O.	2014	shell	Czechia: Svárov, Trněná stráň	50.0450°N 14.1314°E	NMP	P6M 29547	P_152	MF943475						Korábek et al. 2018a
HE000411	11	42	Helix	pomatia	Korábek O.	2014	shell	Czechia: Světlá pod Ještědem, slope of Ještěd	50.7214°N 14.9920°E	NMP	P6M 29550	P_198	MF943373						Korábek et al. 2018a
HE000412	11	36	Helix	pomatia	Korábek O.	2014	shell	Czechia: Telč, Oslednice	49.1736°N 15.4597°E	NMP	P6M 29551	P_196	MF943419						Korábek et al. 2018a
HE000413	11	36	Helix	pomatia	Korábek O.	2014	shell	Czechia: Telč, Oslednice	49.1736°N 15.4597°E	NMP	P6M 29551	P_368	MF943839						Korábek et al. 2018a
HE000414	11	36	Helix	pomatia	Korábek O.	2014	shell	Czechia: Teplice nad Bečvou, train station	49.5301°N 17.7489°E	NMP	P6M 29552	P_268	MF943518						Korábek et al. 2018a
HE000415	11	36	Helix	pomatia	Korábek O.	2014	shell	Czechia: Trnová by Dobříš	49.7942°N 14.1319°E	NMP	P6M 29557	P_133	MF943432						Korábek et al. 2018a
HE000416	11	36	Helix	pomatia	Korábek O.	2015	shell	Czechia: Týnčany env., Divišova jeskyně	49.5728°N 14.3289°E	NMP	P6M 29560	P_329	MF943640						Korábek et al. 2018a
HE000417	55	205	Caucasotachea	vindobonensis	Korábek O.	2015	shell	Czechia: Týnčany env., Divišova jeskyně	49.5728°N 14.3289°E	NMP	P6M 29915	CP52	MK482774	MK482951					Korábek et al. 2020
HE000418	11	36	Helix	pomatia	Korábek O.	2014	shell	Czechia: Uhelná Příbram	49.7642°N 15.5875°E	NMP	P6M 29562	P_204	MF943427						Korábek et al. 2018a
HE000419	55	203	Caucasotachea	vindobonensis	Korábek O.	2015	shell	Czechia: Úhřetice, train station	49.9778°N 15.8616°E	NMP	P6M 29916	CP55	MK482777	MK482954					Korábek et al. 2020
HE000420	11	42	Helix	pomatia	Korábek O.	2017	shell	Czechia: Úštěk, Julčín, PR Na Černčí	50.5470°N 14.3739°E	NMP	P6M 30338	P_974	MF943942						Korábek et al. 2018a
HE000421	55	203	Caucasotachea	vindobonensis	Korábek O.	2014	shell	Czechia: Ústí nad Labem Region: Kleneč	50.3925°N 14.2619°E	NMP	P6M 30480	CV35	MK482828	MK483002					Korábek et al. 2020
HE000422	11	36	Helix	pomatia	Korábek O.	2014	shell	Czechia: Ústí nad Labem, Střekov	50.6431°N 14.0497°E	NMP	P6M 29566	P_42	MF943368						Korábek et al. 2018a
HE000423	11	36	Helix	pomatia	Korábek O.	2017	shell	Czechia: Velemín, “pod Kamýčkem”, forest	50.5556°N 13.9494°E	NMP	P6M 30016	P_997	MF943937						Korábek et al. 2018a
HE000424	11	42	Helix	pomatia	Korábek O.	2017	shell	Czechia: Velemín, “pod Kamýčkem”, forest	50.5556°N 13.9494°E	NMP	P6M 30016	P_996	MF943936						Korábek et al. 2018a
HE000425	11	36	Helix	pomatia	Korábek O.	2017	shell	Czechia: Velemín, “pod Kamýčkem”, forest	50.5556°N 13.9494°E	NMP	P6M 30016	P_995	MF943935						Korábek et al. 2018a
HE000426	11	42	Helix	pomatia	Korábek O.	2017	shell	Czechia: Velemín, “pod Kamýčkem”, forest	50.5556°N 13.9494°E	NMP	P6M 30016	P_994	MF943934						Korábek et al. 2018a
HE000427	11	42	Helix	pomatia	Korábek O.	2017	shell	Czechia: Velemín, “pod Kamýčkem”, forest	50.5556°N 13.9494°E	NMP	P6M 30016	P_993	MF943933						Korábek et al. 2018a
HE000428	11	42	Helix	pomatia	Korábek O.	2017	shell	Czechia: Velemín, “pod Kamýčkem”, forest	50.5556°N 13.9494°E	NMP	P6M 30016	P_992	MF943932						Korábek et al. 2018a
HE000429	11	42	Helix	pomatia	Korábek O.	2017	shell	Czechia: Velemín, “pod Kamýčkem”, spring	50.5554°N 13.9466°E	NMP	P6M 30015	P_998	MF943931						Korábek et al. 2018a
HE000430	11	36	Helix	pomatia	Korábek O.	2014	shell	Czechia: Velká Javorina	48.8622°N 17.6714°E	no voucher		P_206	MF943484						Korábek et al. 2018a
HE000431	11	36	Helix	pomatia	Korábek O.	2013	shell	Czechia: Velký Osek env., Libický luh	50.11°N 15.17°E	NMP	P6M 29270	PO58	MF943337	MF943955					Korábek et al. 2018a	geographic coordinates only indicative
HE000432	11	36	Helix	pomatia	Korábek O.	2014	shell	Czechia: Vítkov	49.7764°N 17.7518°E	NMP	P6M 29582	P_284	MF943524						Korábek et al. 2018a
HE000433	11	36	Helix	pomatia	Korábek O.	2014	shell	Czechia: Vižina	49.8417°N 14.1050°E	NMP	P6M 29271	P_148	MF943377						Korábek et al. 2018a
HE000434	11	36	Helix	pomatia	Korábek O.	2013	shell	Czechia: Vranov nad Dyjí, Ledové sluje	48.8847°N 15.8458°E	NMP	P6M 29525	P_05	MF943352						Korábek et al. 2018a
HE000435	11	36	Helix	pomatia	Korábek O.	2013	shell	Czechia: Všetaty, near railroad to Byšice	50.2902°N 14.5895°E	NMP	P6M 29272	P_30	MF943358						Korábek et al. 2018a
HE000436	11	36	Helix	pomatia	Korábek O.	2014	shell	Czechia: Žabovřesky	49.0067°N 14.3482°E	NMP	P6M 29589	P_141	MF943422						Korábek et al. 2018a
HE000437	11	36	Helix	pomatia	Korábek O.	2014	shell	Czechia: Zákolany, near railway crossing	50.1981°N 14.2493°E	NMP	P6M 29273	P_44	MF943362						Korábek et al. 2018a
HE000438	11	42	Helix	pomatia	Korábek O.	2014	shell	Czechia: Železný Brod	50.6381°N 15.2464°E	NMP	P6M 29597	P_132	MF943429						Korábek et al. 2018a
HE000439	11	36	Helix	pomatia	Korábek O.	2014	shell	Czechia: Žichovice env., PR Čepičná	49.274°N 13.587°E	SMF	346035	P_280	KT211783						Korábek et al. 2016	geographic coordinates only indicative
HE000440	11	36	Helix	pomatia	Korábek O.	2014	shell	Czechia: Zlonice, Nádražní	50.2849°N 14.0823°E	NMP	P6M 29274	P_43	MF943364						Korábek et al. 2018a
HE000441	11	36	Helix	pomatia	Korábek O.	2014	shell	Czechia: Žlutice	50.0850°N 13.1594°E	NMP	P6M 29603	P_165	MF943471						Korábek et al. 2018a
HE000442	16	55	Helix	pronuba	Korábek O.	2016	shell	Egypt: Alexandria	31.2°N 29.9°E	NMBE	22856	ME16	MT949709						Korábek et al. 2021
HE000443	11	36	Helix	pomatia	Korábek O.	2015	shell	Finland: Uusimaa: Tvärminne, zoological station	59.8436°N 23.2465°E	NMP	P6M 29607	P_612	MF943592						Korábek et al. 2018a
HE000444	11	36	Helix	pomatia	Horsák M.	2016	shell	France: Bourgogne-Franche-Comté: Côte-d'Or department: Essarois env., L'Étang du Roi	47.7772°N 4.7986°E	no voucher		P_859	MF943831	MF944062					Korábek et al. 2018a
HE000445	11	36	Helix	pomatia	Horsák M.	2016	shell	France: Bourgogne-Franche-Comté: Doubs department: Pontarlier env., Grande Seigne	46.8936°N 6.3044°E	no voucher		P_858	MF943830	MF944061					Korábek et al. 2018a
HE000446	11	36	Helix	pomatia	Korábek O.	2013	shell	France: Isère: Vercors, Beauregard-Baret env.	44.9914°N 5.1989°E	SMF	346036	PO13	KT211820						Korábek et al. 2016
HE000447	11	36	Helix	pomatia	Korábek O.	2017	shell	France: Provence-Alpes-Côte d'Azur: Col de Turini	43.9758°N 7.3862°E	NMP	P6M 30014	P_999	MF943930	MF944080					Korábek et al. 2018a
HE000448	17	62	Helix	melanostoma	Neiber M. T.		shell	France: Provence-Alpes-Côte-d'Azur: Paradou near Mausanne-les-Alpilles	43.7167°N 4.7833°E	coll. Neiber M. T.		403	KP072199	KP072108	MW465491	MW446062			Korábek et al. 2015
HE000449	11	36	Helix	pomatia	Korábek O.	2013	shell	France: Rhône: Petit Cour near Vienne	45.4386°N 4.8811°E	SMF	342494	PO16	KP072375	MF943943					Korábek et al. 2015
HE000450	24	89	Helix	lucorum	Korábek O.	2013	shell	Georgia: 2km NE from Kaspi, dry walley	41.9264°N 44.4389°E	NMP	P6M 30023	LC88	MG709082						Korábek et al. 2018b
HE000451	24	89	Helix	lucorum	Korábek O.	2013	shell	Georgia: Ananuri	42.1641°N 44.7028°E	coll. Mumladze L., Institute of Ecology, Ilia State University, Tbilisi		LC63	MG709088						Korábek et al. 2018b
HE000452	2	2	Helix	albescens	Korábek O.	2013	shell	Georgia: Dedoplis Tskaro, ca. 1 km from locality 5	41.80°N 46.17°E	SMF	342420	AL4	KP072204	KP072122					Korábek et al. 2015
HE000453	24	89	Helix	lucorum	Korábek O.	2013	shell	Georgia: Dedoplis Tskaro, ca. 1 km from locality 5	41.80°N 46.17°E	SMF	342474	LC86	KP072324						Korábek et al. 2015
HE000454	2	2	Helix	albescens	Korábek O.	2013	shell	Georgia: Dedoplis Tskaro, limestone hill (locality 5)	41.4700°N 46.1078°E	SMF	342419	AL5	KP072205	KP072121		MW446063			Korábek et al. 2015
HE000455	55	205	Caucasotachea	vindobonensis	Korábek O.	2017	shell	Ukraine: Ternopil’ Oblast: forest margin W of Hutys’ko	49.3970°N 24.8100°E	NMP	P6M 30183	CV170	MW443249	MW443894					this study
HE000456	56	207	Caucasotachea	atrolabiata	Korábek O.	2013	mtDNA	Georgia: Khamiskuri env.	42.3941°N 41.8376°E	coll. Mumladze L., Institute of Ecology, Ilia State University, Tbilisi		CA14	MW443496	MW443895					this study
HE000457	56	207	Caucasotachea	atrolabiata	Korábek O.	2013	mtDNA	Georgia: Khamiskuri env.	42.3941°N 41.8376°E	coll. Mumladze L., Institute of Ecology, Ilia State University, Tbilisi		CA13	MW443229	MW443896					this study
HE000458	24	89	Helix	lucorum	Korábek O.	2013	shell	Georgia: Kvakvhreli	41.9648°N 44.2176°E	coll. Mumladze L., Institute of Ecology, Ilia State University, Tbilisi		LC55	MG709089						Korábek et al. 2018b
HE000459	56	207	Caucasotachea	atrolabiata	Korábek O.	2013	mtDNA	Georgia: Mtskheta env.	41.8388°N 44.7154°E	coll. Mumladze L., Institute of Ecology, Ilia State University, Tbilisi		CA15	MW443497	MW443897					this study
HE000460	56	207	Caucasotachea	atrolabiata	Korábek O.	2013	shell	Georgia: north of Khoni	42.3936°N 42.4751°E	coll. Mumladze L., Institute of Ecology, Ilia State University, Tbilisi		CA3	KP072266						Korábek et al. 2015
HE000461	24	89	Helix	lucorum	Korábek O.	2013	shell	Georgia: Pasanauri	42.3586°N 44.6844°E	NMP	P6M 30024	LC59	MG709066						Korábek et al. 2018b
HE000462	24	89	Helix	lucorum	Korábek O.	2013	shell	Georgia: SE of Tbilisi by Kura river	41.6306°N 44.9245°E	coll. Mumladze L., Institute of Ecology, Ilia State University, Tbilisi		LC53	MG709090	MG709122					Korábek et al. 2018b
HE000463	24	89	Helix	lucorum	Korábek O.	2013	shell	Georgia: SE of Tbilisi by Kura river	41.6306°N 44.9245°E	coll. Mumladze L., Institute of Ecology, Ilia State University, Tbilisi		LC64	MG709084						Korábek et al. 2018b
HE000464	24	89	Helix	lucorum	Korábek O.	2013	shell	Georgia: W of Pasanauri, abandoned houses	42.3225°N 44.4756°E	NMP	P6M 30025	LC85	MG709063						Korábek et al. 2018b
HE000465	13	44	Helix	buchii	Korábek O.	2013	shell	Georgia: W of Pasanauri, mountain tops above the village	42.35°N 44.64°E	SMF	342514	BC15	KP072255	KP072166		MW446064			Korábek et al. 2015
HE000466	11	36	Helix	pomatia	Korábek O.	2015	shell	Germany: Baden-Württemberg: Geislingen env., by Kochertalbrücke	49.1750°N 9.7931°E	NMP	P6M 29609	P_712	MF943634						Korábek et al. 2018a
HE000467	11	36	Helix	pomatia	Korábek O.	2014	shell	Germany: Baden-Württemberg: Melchingen	48.36°N 9.15°E	NMP	P6M 29650	P_299	MF943507						Korábek et al. 2018a	geographic coordinates only indicative
HE000468	11	36	Helix	pomatia	Korábek O.	2016	shell	Germany: Baden-Württemberg: Nattheim, near a cave	48.7052°N 10.2261°E	NMP	P6M 29610	P_483	MF943749	MF944024					Korábek et al. 2018a
HE000469	11	36	Helix	pomatia	Korábek O.	2016	shell	Germany: Baden-Württemberg: Nattheim, near a cave	48.7052°N 10.2261°E	NMP	P6M 29610	P_497	MF943886						Korábek et al. 2018a
HE000470	11	36	Helix	pomatia	Korábek O.	2015	shell	Germany: Baden-Württemberg: Schelingen near Breisach am Rhein env.	48.1036°N 7.6906°E	NMP	P6M 29611	P_618	MF943593						Korábek et al. 2018a
HE000471	11	36	Helix	pomatia	Korábek O.	2014	shell	Germany: Baden-Württemberg: Tübingen	48.52°N 9.06°E	NMP	P6M 29660	P_282	MF943506						Korábek et al. 2018a	geographic coordinates only indicative
HE000472	11	36	Helix	pomatia	Korábek O.	2016	shell	Germany: Bayern: Altdorf bei Nürnberg, by A3 motorway	49.3773°N 11.3527°E	NMP	P6M 29612	P_477	MF943742						Korábek et al. 2018a
HE000473	11	36	Helix	pomatia	Korábek O.	2016	shell	Germany: Bayern: Bad Griesbach im Rottal, Parzham	48.4408°N 13.1604°E	NMP	P6M 29613	P_485	MF943757						Korábek et al. 2018a
HE000474	11	36	Helix	pomatia	Korábek O.	2016	shell	Germany: Bayern: Beiersdorf	48.9634°N 11.7425°E	NMP	P6M 29614	P_474	MF943744	MF944022					Korábek et al. 2018a
HE000475	11	36	Helix	pomatia	Korábek O.	2016	shell	Germany: Bayern: between Kelheim and Essing, Schulerloch	48.9277°N 11.8189°E	NMP	P6M 29615	P_462	MF943745						Korábek et al. 2018a
HE000476	11	36	Helix	pomatia	Korábek O.	2016	shell	Germany: Bayern: between Kelheim and Essing, Schulerloch	48.9277°N 11.8189°E	NMP	P6M 29615	P_499	MF943884						Korábek et al. 2018a
HE000477	11	36	Helix	pomatia	Korábek O.	2016	shell	Germany: Bayern: Dasing, Laimering	48.3935°N 11.0856°E	NMP	P6M 29616	P_460	MF943752						Korábek et al. 2018a
HE000478	11	41	Helix	pomatia	Korábek O.	2016	shell	Germany: Bayern: Deggendorf, Egginger St.	48.8316°N 12.9507°E	NMP	P6M 29617	P_479	MF943759	MF944026					Korábek et al. 2018a
HE000479	11	36	Helix	pomatia	Korábek O.	2016	shell	Germany: Bayern: Deggendorf, Egginger St.	48.8316°N 12.9507°E	NMP	P6M 29617	P_520	MF943889						Korábek et al. 2018a
HE000480	11	36	Helix	pomatia	Korábek O.	2016	shell	Germany: Bayern: Erlangen env., forest by the Danube – Main channel near Hüttendorf	49.5436°N 10.9728°E	NMP	P6M 29618	P_482	MF943741						Korábek et al. 2018a
HE000481	11	36	Helix	pomatia	Korábek O.	2016	shell	Germany: Bayern: Hof, Königstraße	50.3100°N 11.9221°E	NMP	P6M 29619	P_864	MF943731	MF944019					Korábek et al. 2018a
HE000482	11	36	Helix	pomatia	Korábek O.	2016	shell	Germany: Bayern: Holzkirchen, Baumgarten	47.8681°N 11.6686°E	NMP	P6M 29620	P_865	MF943826						Korábek et al. 2018a
HE000483	11	36	Helix	pomatia	Korábek O.	2016	shell	Germany: Bayern: Jetzendorf	48.4357°N 11.4180°E	NMP	P6M 29621	P_489	MF943753						Korábek et al. 2018a
HE000484	11	36	Helix	pomatia	Korábek O.	2015	shell	Germany: Bayern: Kammerstein	49.3031°N 10.9878°E	NMP	P6M 29622	P_718	MF943637						Korábek et al. 2018a
HE000485	11	36	Helix	pomatia	Korábek O.	2016	shell	Germany: Bayern: Kirchroth, Aufroth	48.9665°N 12.5570°E	NMP	P6M 29623	P_458	MF943760						Korábek et al. 2018a
HE000486	11	36	Helix	pomatia	Korábek O.	2016	shell	Germany: Bayern: Kirchroth, Aufroth	48.9665°N 12.5570°E	NMP	P6M 29623	P_744	MF943890						Korábek et al. 2018a
HE000487	11	36	Helix	pomatia	Korábek O.	2014	shell	Germany: Bayern: Lanzenbach	47.5102°N 10.0595°E	NMP	P6M 29624	P_260	MF943528	MF943985					Korábek et al. 2018a
HE000488	11	36	Helix	pomatia	Korábek O.	2016	shell	Germany: Bayern: Lauingen	48.5686°N 10.4342°E	NMP	P6M 29625	P_471	MF943765						Korábek et al. 2018a
HE000489	11	36	Helix	pomatia	Korábek O.	2016	shell	Germany: Bayern: Leuchtenberg	49.5977°N 12.2557°E	NMP	P6M 29626	P_492	MF943735						Korábek et al. 2018a
HE000490	11	36	Helix	pomatia	Korábek O.	2014	shell	Germany: Bayern: Memmingen	47.9997°N 10.1886°E	NMP	P6M 29651	P_272	MF943503						Korábek et al. 2018a
HE000491	11	36	Helix	pomatia	Korábek O.	2016	shell	Germany: Bayern: Memmingen env., A96 road by Buxheim	47.9878°N 10.1331°E	NMP	P6M 29627	P_473	MF943734	MF944021					Korábek et al. 2018a
HE000492	11	36	Helix	pomatia	Korábek O.	2013	shell	Germany: Bayern: München	48.1811°N 11.6131°E	SMF	346037	PO4	KF823055	KF823091					Korábek et al. 2014
HE000493	11	36	Helix	pomatia	Korábek O.	2015	shell	Germany: Bayern: Murnau am Staffelsee, Seeleiten	47.6779°N 11.1848°E	NMP	P6M 29628	P_730	MF943677						Korábek et al. 2018a
HE000494	11	36	Helix	pomatia	Korábek O.	2016	shell	Germany: Bayern: Nabburg	49.4525°N 12.1773°E	NMP	P6M 29629	P_472	MF943736						Korábek et al. 2018a
HE000495	11	36	Helix	pomatia	Korábek O.	2016	shell	Germany: Bayern: Nersingen	48.4328°N 10.1206°E	NMP	P6M 29630	P_484	MF943750						Korábek et al. 2018a
HE000496	11	36	Helix	pomatia	Korábek O.	2016	shell	Germany: Bayern: Neuburg an der Donau	48.7394°N 11.2115°E	NMP	P6M 29631	P_486	MF943747	MF944023					Korábek et al. 2018a
HE000497	11	36	Helix	pomatia	Korábek O.	2016	shell	Germany: Bayern: Neuburg an der Donau	48.7394°N 11.2115°E	NMP	P6M 29631	P_516	MF943885						Korábek et al. 2018a
HE000498	11	36	Helix	pomatia	Korábek O.	2016	shell	Germany: Bayern: Neuhaus an der Pegnitz, Maxmilliansgrotte	49.6287°N 11.5893°E	NMP	P6M 29632	P_469	MF943738						Korábek et al. 2018a
HE000499	11	36	Helix	pomatia	Korábek O.	2016	shell	Germany: Bayern: Neuhaus an der Pegnitz, Maxmilliansgrotte	49.6287°N 11.5893°E	NMP	P6M 29632	P_519	MF943881						Korábek et al. 2018a
HE000500	11	36	Helix	pomatia	Korábek O.	2016	shell	Germany: Bayern: Pottenstein, Teufelshöhle	49.7544°N 11.4204°E	NMP	P6M 29633	P_478	MF943739						Korábek et al. 2018a
HE000501	11	41	Helix	pomatia	Korábek O.	2016	shell	Germany: Bayern: Pottenstein, Teufelshöhle	49.7544°N 11.4204°E	NMP	P6M 29633	P_517	MF943882						Korábek et al. 2018a
HE000502	11	36	Helix	pomatia	Korábek O.	2016	shell	Germany: Bayern: Raubling	47.7914°N 12.1114°E	NMP	P6M 29634	P_868	MF943827	MF944060					Korábek et al. 2018a
HE000503	11	36	Helix	pomatia	Korábek O.	2014	shell	Germany: Bayern: Tiefenbach	47.4277°N 10.2353°E	NMP	P6M 29635	P_263	MF943529						Korábek et al. 2018a
HE000504	11	36	Helix	pomatia	Korábek O.	2016	shell	Germany: Bayern: Trondorf env., Osterhöhle	49.5194°N 11.6628°E	NMP	P6M 29636	P_491	MF943737						Korábek et al. 2018a
HE000505	11	36	Helix	pomatia	Korábek O.	2016	shell	Germany: Bayern: Unterdietfurt, Huldsessen	48.3978°N 12.7084°E	NMP	P6M 29637	P_488	MF943756	MF944025				MK347426	Korábek et al. 2018a, Korábek et al. 2019	partial 16S and COI sequences were sequenced first and are available separately under acc. nos. MF943756 and MF944025
HE000506	11	36	Helix	pomatia	Korábek O.	2016	shell	Germany: Bayern: Velburg, St. Colomann, Tropfsteinhöhle	49.2517°N 11.6899°E	NMP	P6M 29638	P_468	MF943743						Korábek et al. 2018a
HE000507	11	36	Helix	pomatia	Korábek O.	2016	shell	Germany: Bayern: Velburg, St. Colomann, Tropfsteinhöhle	49.2517°N 11.6899°E	NMP	P6M 29638	P_480	MF943883						Korábek et al. 2018a
HE000508	11	36	Helix	pomatia	Korábek O.	2016	shell	Germany: Bayern: Velden, Erlach	48.3434°N 12.2468°E	NMP	P6M 29639	P_487	MF943755						Korábek et al. 2018a
HE000509	11	36	Helix	pomatia	Korábek O.	2016	shell	Germany: Bayern: Velden, Erlach	48.3434°N 12.2468°E	NMP	P6M 29639	P_518	MF943887						Korábek et al. 2018a
HE000510	11	36	Helix	pomatia	Korábek O.	2016	shell	Germany: Bayern: Vohburg	48.7715°N 11.6266°E	NMP	P6M 29640	P_456	MF943746						Korábek et al. 2018a
HE000511	11	36	Helix	pomatia	Korábek O.	2016	shell	Germany: Bayern: Wemding	48.8767°N 10.7086°E	NMP	P6M 29641	P_457	MF943748						Korábek et al. 2018a
HE000512	11	36	Helix	pomatia	Korábek O.	2016	shell	Germany: Bayern: Wiesenttal, Streitberg	49.8118°N 11.2180°E	NMP	P6M 29642	P_470	MF943740						Korábek et al. 2018a
HE000513	11	36	Helix	pomatia	Korábek O.	2016	shell	Germany: Bayern: Windorf, Danube bank	48.6273°N 13.2141°E	NMP	P6M 29643	P_481	MF943758						Korábek et al. 2018a
HE000514	11	36	Helix	pomatia	Korábek O.	2016	shell	Germany: Bayern: Windorf, Danube bank	48.6273°N 13.2141°E	NMP	P6M 29643	P_509	MF943888						Korábek et al. 2018a
HE000515	11	36	Helix	pomatia	Korábek O.	2016	shell	Germany: Bayern: Ziertheim	48.6514°N 10.3978°E	NMP	P6M 29644	P_461	MF943764						Korábek et al. 2018a
HE000516	11	36	Helix	pomatia	Korábek O.	2016	shell	Germany: Bayern: Zolling, Siechendorf	48.4652°N 11.7381°E	NMP	P6M 29645	P_459	MF943754						Korábek et al. 2018a
HE000517	11	36	Helix	pomatia	Korábek O.	2016	shell	Germany: Bayern: Zusmarshausen, Salenbach	48.4172°N 10.5992°E	NMP	P6M 29646	P_476	MF943751						Korábek et al. 2018a
HE000518	11	36	Helix	pomatia	Korábek O.	2015	shell	Germany: Berlin, Friedrichshagen, by Großer Mügelsee	52.4482°N 13.6423°E	NMP	P6M 29647	P_445	MF943549						Korábek et al. 2018a
HE000519	11	36	Helix	pomatia	Neiber M. T.		shell	Germany: Brandenburg: Landkreis Barnim, Katzenberg N of Chorin	52.9219°N 13.8831°E	coll. Neiber M. T.		MN395	MF943688						Korábek et al. 2018a
HE000520	11	36	Helix	pomatia	Neiber M. T.		shell	Germany: Brandenburg: Landkreis Uckermark, Herzsprung am Parsteiner See	52.9661°N 13.9850°E	coll. Neiber M. T.		MN394	MF943687						Korábek et al. 2018a
HE000521	11	36	Helix	pomatia	Korábek O.	2015	shell	Germany: Hessen: Ehlen, Hundsberg	51.3126°N 9.2950°E	NMP	P6M 29648	P_714	MF943639						Korábek et al. 2018a
HE000522	11	36	Helix	pomatia	Korábek O.	2013	shell	Germany: Mecklenburg-Vorpommern: Schwaan	53.9406°N 12.1275°E	NMP	P6M 29649	PO15	MF943333	MF943951					Korábek et al. 2018a
HE000523	11	36	Helix	pomatia	Neiber M. T.		shell	Germany: Niedersachsen: Landkreis Osterode am Harz, Bad Sachsa, Großer Trogstein west of Kolonie Tettenborn	51.5753°N 10.5350°E	coll. Neiber M. T.		MN232	MF943682						Korábek et al. 2018a
HE000524	11	36	Helix	pomatia	Neiber M. T.		shell	Germany: Niedersachsen: Landkreis Osterode am Harz, Freiheit, forest above "Am Oberen Vogelherd" street	51.7417°N 10.2744°E	coll. Neiber M. T.		MN299	MF943686						Korábek et al. 2018a
HE000525	11	36	Helix	pomatia	Neiber M. T.		shell	Germany: Niedersachsen: Landkreis Osterode am Harz, Katzenstein, Gipsklippen	51.7536°N 10.2064°E	coll. Neiber M. T.		MN233	MF943683						Korábek et al. 2018a
HE000526	11	36	Helix	pomatia	Neiber M. T.		shell	Germany: Niedersachsen: Landkreis Osterode am Harz, Katzenstein, Gipsklippen	51.7536°N 10.2064°E	coll. Neiber M. T.		MN234	MF943874						Korábek et al. 2018a
HE000527	11	36	Helix	pomatia	Neiber M. T.		shell	Germany: Niedersachsen: Landkreis Osterode am Harz, Katzenstein, Gipsklippen	51.7536°N 10.2064°E	coll. Neiber M. T.		MN235	MF943875						Korábek et al. 2018a
HE000528	11	36	Helix	pomatia	Neiber M. T.		shell	Germany: Niedersachsen: Region Hannover, Höver, Gaim, north of the Mittellandkanal, Mergelhalde	52.3433°N 9.8811°E	coll. Neiber M. T.		MN187	MF943681						Korábek et al. 2018a
HE000529	11	36	Helix	pomatia	Korábek O.	2013	shell	Germany: Niedersachsen: Sehlde near Hildesheim	52.0269°N 10.2200°E	SMF	346038	PO14	KT211821						Korábek et al. 2016
HE000530	11	36	Helix	pomatia	Korábek O.	2015	shell	Germany: Nordrhein-Westfalen: Frechen, Königsdorf, Neubuschbell	50.9291°N 6.7744°E	NMP	P6M 29652	P_713	MF943636						Korábek et al. 2018a
HE000531	11	36	Helix	pomatia	Korábek O.	2015	shell	Germany: Rheinland-Pfalz: Eußerthal	49.2546°N 7.9625°E	NMP	P6M 29653	P_337	MF943544						Korábek et al. 2018a
HE000532	11	36	Helix	pomatia	Korábek O.	2015	shell	Germany: Rheinland-Pfalz: Landau, Nußdorf	49.2227°N 8.1106°E	NMP	P6M 29654	P_341	MF943545						Korábek et al. 2018a
HE000533	11	36	Helix	pomatia	Korábek O.	2015	shell	Germany: Rheinland-Pfalz: Speyer	49.3181°N 8.4465°E	NMP	P6M 29655	P_448	MF943543						Korábek et al. 2018a
HE000534	11	36	Helix	pomatia	Korábek O.	2015	shell	Germany: Sachsen-Anhalt: Bischofrode	51.4871°N 11.5370°E	NMP	P6M 29656	P_721	MF943635	MF944001					Korábek et al. 2018a
HE000535	11	36	Helix	pomatia	Korábek O.	2016	shell	Germany: Sachsen: Cunewalde	51.0998°N 14.5033°E	NMP	P6M 29657	P_496	MF943768	MF944029					Korábek et al. 2018a
HE000536	11	36	Helix	pomatia	Korábek O.	2016	shell	Germany: Sachsen: Dresden-Klotzsche, bicycle path on the corner of the streets Grenzstrasse and Koenigsbruecker Landstrasse	51.1258°N 13.7917°E	SNSD Moll.	S8187, S8188	P_910	MF943723						Korábek et al. 2018a
HE000537	11	36	Helix	pomatia	Korábek O.	2016	shell	Germany: Sachsen: Herrnhut, Gottesacker	51.0201°N 14.7478°E	NMP	P6M 29658	P_883	MF943766						Korábek et al. 2018a
HE000538	11	36	Helix	pomatia	Neiber M. T.		shell	Germany: Sachsen: Landkreis Meißen, Triebisch-Tal east of Rothschönberg	51.0664°N 13.4033°E	coll. Neiber M. T.		MN430	MF943690						Korábek et al. 2018a
HE000539	11	36	Helix	pomatia	Neiber M. T.		shell	Germany: Sachsen: Landkreis Meißen, Wachtnitz, Eichberg	51.1867°N 13.3578°E	coll. Neiber M. T.		MN429	MF943689						Korábek et al. 2018a
HE000540	11	36	Helix	pomatia	Korábek O.	2016	shell	Germany: Sachsen: Leipzig, Boehlitz-Ehrenberg, dried up ditch between between former landfill and deciduous forest Burgaue	51.3663°N 12.2873°E	SNSD Moll.	S8189, S8190	P_911	MF943724						Korábek et al. 2018a
HE000541	11	36	Helix	pomatia	Korábek O.	2016	shell	Germany: Sachsen: Löbau, Löbauer Berg	51.0929°N 14.6960°E	NMP	P6M 29659	P_498	MF943767						Korábek et al. 2018a
HE000542	11	36	Helix	pomatia	Korábek O.	2016	shell	Germany: Sachsen: Wildenfels, on walls on the north side of the castle complex	50.6648°N 12.6059°E	SNSD Moll.	S8180, S8181	P_909	MF943722						Korábek et al. 2018a
HE000543	19	66	Helix	borealis	Korábek O.	2016	shell	Greece: Central Greece: Anatoliki Fragkista env.	38.9609°N 21.6105°E	NMBE	565413	BR11	MT949710	MT947396					Korábek et al. 2021
HE000544	33	126	Helix	figulina	Korábek O.	2016	shell	Greece: Central Greece: Delphi	38.48°N 22.50°E	SMF	360416	FG16	MW443498						this study
HE000545	33	126	Helix	figulina	Korábek O.	2016	shell	Greece: Central Greece: Delphi	38.48°N 22.50°E	SMF	360416	FG17	MW443230	MW443898					this study
HE000546	19	66	Helix	borealis	Korábek O.	2016	shell	Greece: Central Greece: Karpenisi, restaurant on road to Agrinio before Ano Kalesmeno	38.9239°N 21.7447°E	NMBE	565412	BR14A	MT949711	MT947397					Korábek et al. 2021
HE000547	19	66	Helix	borealis	Korábek O.	2016	shell	Greece: Central Greece: Karpenisi, restaurant on road to Agrinio before Ano Kalesmeno	38.9239°N 21.7447°E	NMBE	565412	BR14B	MT949712	MT947398					Korábek et al. 2021
HE000548	19	66	Helix	borealis	Korábek O.	2016	shell	Greece: Central Greece: Karpenisi, restaurant on road to Agrinio before Ano Kalesmeno	38.9239°N 21.7447°E	NMBE	565412	BR14C	MT949713						Korábek et al. 2021
HE000549	19	66	Helix	borealis	Korábek O.	2016	shell	Greece: Central Greece: Karpenisi, restaurant on road to Agrinio before Ano Kalesmeno	38.9239°N 21.7447°E	NMBE	565412	BR14D	MT949714						Korábek et al. 2021
HE000550	19	66	Helix	borealis	Korábek O.	2016	shell	Greece: Central Greece: Karpenisi, restaurant on road to Agrinio before Ano Kalesmeno	38.9239°N 21.7447°E	NMBE	565412	BR14E	MT949715	MT947399					Korábek et al. 2021
HE000551	51	175	Codringtonia	parnassia	Korábek O.	2016	shell	Greece: Central Greece: Kokkoti env.	39.0759°N 22.7860°E	SMF	360383	CO6A	MW443499	MW443899					this study
HE000552	51	179	Codringtonia	parnassia	Korábek O.	2016	shell	Greece: Central Greece: Thermopyles, hot spring	38.7921°N 22.5258°E	SMF	360384	CO11A	MW443500	MW443900					this study
HE000553	51	175	Codringtonia	parnassia	Korábek O.	2016	shell	Greece: Central Greece: Vrinena env.	39.0622°N 22.8022°E	SMF	360385	CO10A	MW443501	MW443901					this study
HE000554	24	89	Helix	lucorum	Korábek O.	2013	shell	Greece: Central Macedonia: between Stavros and Rentina	40.6678°N 23.6483°E	NMP	P6M 30026	LC71	MG709074	MG709116					Korábek et al. 2018b
HE000555	1	1	Helix	philibinensis	Korábek O.	2013	shell	Greece: Central Macedonia: between Stavros and Retina	40.6678°N 23.6483°E	SMF	342490	PL6	KP072374		MW465504				Korábek et al. 2015
HE000556	3	4	Helix	pelagonesica	Korábek O.	2014	shell	Greece: Central Macedonia: Leptokária env., road to Kallithea Elassonos	40.0381°N 22.5236°E	SMF	342486	SR3	KP072397	KP072172					Korábek et al. 2015
HE000557	3	4	Helix	pelagonesica	Korábek O.	2016	shell	Greece: Central Macedonia: Leptokarya env.	40.0375°N 22.5219°E	SMF	360448	PG1	MW443502	MW443902					this study
HE000558	55	206	Caucasotachea	vindobonensis	Korábek O.	2016	shell	Greece: Central Macedonia: Leptokarya env.	40.0374°N 22.5249°E	NMP	P6M 29919	CV99	MK482893	MK483067					Korábek et al. 2020
HE000559	55	206	Caucasotachea	vindobonensis	Korábek O.	2016	shell	Greece: Central Macedonia: Leptokarya env.	40.0374°N 22.5249°E	NMP	P6M 29919	CV48	MK482839	MK483013					Korábek et al. 2020
HE000560	3	4	Helix	pelagonesica	Korábek O.	2014	shell	Greece: Central Macedonia: Petra Olympou	40.1803°N 22.3286°E	SMF	342487	SR5	KP072399	KP072170	MW465516	MW446065	MW465463		Korábek et al. 2015
HE000561	3	5	Helix	pelagonesica	Korábek O.	2013	shell	Greece: Central Macedonia: Sithonía, Porto Koufós, rocks in a quarry S of the village	39.9576°N 23.9263°E	NMBE	520670	SRN	KP072401	MW443903					Korábek et al. 2015
HE000562	24	89	Helix	lucorum	Korábek O.	2013	shell	Greece: Central Macedonia: Skrá, falls	41.0653°N 22.3944°E	NMP	P6M 30027	LC82	MG709070	MG709114					Korábek et al. 2018b
HE000563	55	205	Caucasotachea	vindobonensis	Korábek O.	2013	shell	Greece: Central Macedonia: Skrá, falls	41.0653°N 22.3944°E	NMP	P6M 29921	CV11	MK482796	MK482971					Korábek et al. 2020
HE000564	20	69	Helix	borealis	Korábek O.	2017	shell	Greece: Crete: between Alikampos and Kournas	35.33°N 24.25°E	NHMC	50.21884	BR21A	MT949716	MT947400		MW446066			Korábek et al. 2021	geographic coordinates only indicative
HE000565	20	69	Helix	borealis	Korábek O.	2017	shell	Greece: Crete: between Alikampos and Kournas	35.33°N 24.25°E	NHMC	50.21884	BR21B	MT949717						Korábek et al. 2021	geographic coordinates only indicative
HE000566	20	69	Helix	borealis	Korábek O.	2017	shell	Greece: Crete: Lefka Ori mt., 800 m a.s.l., ascending from Anopoli, pinewood	35.24°N 24.09°E	NHMC	50.5604	BR23A	MT949718						Korábek et al. 2021	geographic coordinates only indicative
HE000567	31	117	Helix	godetiana	Korábek O.	2013	shell	Greece: Cyclades: Naxos, S of Agiassos	36.95°N 25.45°E	NHMC	50.0989	GT1	Korábek et al. 2015, Supplementary file S2						Korábek et al. 2015	geographic coordinates only indicative
HE000568	33	127	Helix	figulina	Korábek O.	2013	shell	Greece: Cyclades: Paros	37.0°N 25.2°E	NMBE	505542	FG2	KP072299						Korábek et al. 2015	geographic coordinates only indicative
HE000569	14	48	Helix	cincta	Korábek O.	2013	shell	Greece: Dodecanese: Leipsoi island	37.30°N 26.74°E	SMF	337969/6	CN35	KP072275						Korábek et al. 2015	geographic coordinates only indicative
HE000570	1	1	Helix	philibinensis	Korábek O.	2013	shell	Greece: East Macedonia and Thrace: Philippi ruins	41.0133°N 24.2836°E	SMF	342489	PL7	KF823050	KF823086		KT211684			Korábek et al. 2015, Korábek et al. 2016
HE000571	24	89	Helix	lucorum	Korábek O.	2013	shell	Greece: East Macedonia and Thrace: Polia env., near Erythropotamos river	41.4417°N 26.2328°E	NMP	P6M 30427	LC80	MG709068	MG709113					Korábek et al. 2018b
HE000572	55	203	Caucasotachea	vindobonensis	Korábek O.	2013	shell	Greece: East Macedonia and Thrace: Polia env., near Erythropotamos river	41.4417°N 26.2328°E	NMP	P6M 29922	CV9	MK482883	MK483057					Korábek et al. 2020
HE000573	1	1	Helix	philibinensis	Korábek O.	2013	shell	Greece: East Macedonia: Zarkadia env., 2 km NNE, limestone	41.03°N 24.65°E	NMBE	519952/2	PL2	KP072372						Korábek et al. 2015
HE000574	9	27	Helix	schlaeflii	Korábek O.	2016	shell	Greece: Epirus: Karteri env., slope above road to Igoumenitsa	39.3953°N 20.3702°E	SMF	360456	SH3	MW443503	MW443904					this study
HE000575	9	27	Helix	schlaeflii	Korábek O.	2016	shell	Greece: Epirus: Kotsika	39.6592°N 20.2471°E	SMF	360457	SH2	MW443504	MW443905					this study
HE000576	9	27	Helix	schlaeflii	Korábek O.	2013	shell	Greece: Epirus: Amfithea at the Ioannina Lake	39.70°N 20.87°E	coll. Hausdorf B.		SC2	KF823060	KF823096		KT211692			Korábek et al. 2014, Korábek et al. 2016	originally published with an icorrect locality Vrosina, 1 km in direction Igoumenitsa (39°42'N 20°52'E )
HE000577	18	64	Helix	borealis	Korábek O.	2016	shell	Greece: Evvia: canyon between Vassilika and Ellinika	38.9939°N 23.3483°E	NMBE	565414	BR12A	MT949719	MT947401	MW465523	MW446067	MW465464		Korábek et al. 2021
HE000578	18	64	Helix	borealis	Korábek O.	2016	shell	Greece: Evvia: canyon between Vassilika and Ellinika	38.9939°N 23.3483°E	NMBE	565414	BR12B	MT949720						Korábek et al. 2021
HE000579	18	64	Helix	borealis	Korábek O.	2016	shell	Greece: Evvia: canyon between Vassilika and Ellinika	38.9939°N 23.3483°E	NMBE	565414	BR12C	MT949721	MT947402					Korábek et al. 2021
HE000580	33	128	Helix	figulina	Korábek O.	2016	shell	Greece: Evvia: Mantoudi, rocks	38.8000°N 23.4733°E	SMF	360418	FG13	MZ376673	MZ382610		MW446068	MW465465		Neiber et al. 2021
HE000581	19	68	Helix	borealis	Korábek O.	2013	shell	Greece: Kefalonia: Póros, limestone gorge	38.1519°N 20.7733°E	NMBE	522334	BR31	KP072261						Korábek et al. 2015
HE000582	19	68	Helix	borealis	Korábek O.	2017	shell	Greece: Kerkyra (Corfu): Pantokratoras mt., Petaleia	39.750°N 19.840°E	NHMC	50.30237	BR24	MT949722						Korábek et al. 2021	geographic coordinates only indicative
HE000583	32	121	Helix	cf. nucula	Korábek O.	2013	shell&mtDNA	Greece: Lesbos: Mytilini, castle	39.11°N 26.56°E	SMF	338022/1	FG11	KP072298						Korábek et al. 2015	geographic coordinates only indicative
HE000584	55	203	Caucasotachea	vindobonensis	Korábek O.	2014	shell	Greece: Macedonia: near Kokkinogia	41.1936°N 23.9069°E	NMP	P6M 29923	CP27	MK482750	MK482927					Korábek et al. 2020
HE000585	55	203	Caucasotachea	vindobonensis	Korábek O.	2014	shell	Greece: Macedonia: near Kokkinogia	41.1936°N 23.9069°E	NMP	P6M 29923	CP44	MK482768	MK482945					Korábek et al. 2020
HE000586	5	17	Helix	thessalica	Korábek O.	2015	shell	Greece: Macedonia: Sidirónero, 12.9 km in direction Livaderó	41.2740°N 24.2088°E	NMBE	522265/2, 520671/2	P_671	KT211817	KT211708		KT211683			Korábek et al. 2016
HE000587	52	181	Codringtonia	elisabethae	Korábek O.	2016	shell&origin	Greece: Peloponnese: Agionori env.	37.7439°N 22.8739°E	SMF	360369	CO17A	MW443505	MW443906					this study
HE000588	52	181	Codringtonia	elisabethae	Korábek O.	2016	shell&origin	Greece: Peloponnese: Agionori env.	37.7439°N 22.8739°E	SMF	360369	CO17B	MW443231	MW443907	MW465521	MW446069	MW465466		this study		MW465453
HE000589	52	181	Codringtonia	elisabethae	Korábek O.	2016	shell&origin	Greece: Peloponnese: Agionori env., toward Limnes	37.7334°N 22.8778°E	SMF	360370	CO14A	MW443506	MW443908					this study
HE000590	19	67	Helix	borealis	Korábek O.	2016	shell	Greece: Peloponnese: Archaia Messina, Messene ruins, theatre	37.1778°N 21.9195°E	NMBE	565398	BR7B	MT949723						Korábek et al. 2021
HE000591	19	67	Helix	borealis	Korábek O.	2016	shell	Greece: Peloponnese: Archaia Messina, Messene ruins, theatre	37.1778°N 21.9195°E	NMBE	565398	BR7C	MT949724	MT947403					Korábek et al. 2021
HE000592	19	67	Helix	borealis	Korábek O.	2016	shell	Greece: Peloponnese: Archaia Messina, Messene ruins, theatre	37.1778°N 21.9195°E	NMBE	565398	BR7D	MT949725						Korábek et al. 2021
HE000593	19	67	Helix	borealis	Korábek O.	2016	shell	Greece: Peloponnese: Archaia Messina, Messene ruins, theatre	37.1778°N 21.9195°E	NMBE	565398	BR7E	MT949726						Korábek et al. 2021
HE000594	19	67	Helix	borealis	Korábek O.	2016	shell	Greece: Peloponnese: Archaia Messina, Messene ruins, theatre	37.1778°N 21.9195°E	NMBE	565398	BR7F	MT949727						Korábek et al. 2021
HE000595	52	187	Codringtonia	eucineta	Korábek O.	2016	shell&origin	Greece: Peloponnese: Archaia Messina, Messene ruins, theatre	37.1778°N 21.9195°E	SMF	360376	CO9A	MW443507	MW443909					this study
HE000596	52	181	Codringtonia	elisabethae	Korábek O.	2016	shell&origin	Greece: Peloponnese: between Dragoumi and Mesorrachi	37.3858°N 22.5302°E	SMF	360371	CO13A	MW443508	MW443910					this study
HE000597	52	181	Codringtonia	elisabethae	Korábek O.	2013	shell	Greece: Peloponnese: east of Limnes	37.7331°N 22.9264°E	SMF	360372	CO3	MW443509						this study
HE000598	19	67	Helix	borealis	Korábek O.	2016	shell	Greece: Peloponnese: Kyparissia, castle ruins	37.2497°N 21.6791°E	NMBE	565399	BR5	MT949728						Korábek et al. 2021
HE000599	52	181	Codringtonia	elisabethae	Korábek O.	2016	shell&origin	Greece: Peloponnese: Mycenae	37.7309°N 22.7590°E	SMF	360373	CO5A	MW443510	MW443911					this study
HE000600	52	181	Codringtonia	elisabethae	Korábek O.	2016	shell&origin	Greece: Peloponnese: Mycenae	37.7309°N 22.7590°E	SMF	360373	CO5B	MW443232						this study
HE000601	33	128	Helix	figulina	Korábek O.	2016	shell	Greece: Peloponnese: Mycenae	37.7287°N 22.7547°E	SMF	360420	FG15	MW443511	MW443912					this study
HE000602	33	128	Helix	figulina	Korábek O.	2016	shell	Greece: Peloponnese: Mycenae	37.7287°N 22.7547°E	SMF	360420	FG18	MW443233						this study
HE000603	52	181	Codringtonia	elisabethae	Korábek O.	2016	shell&origin	Greece: Peloponnese: near Tripoli, Rizes env.	37.4411°N 22.4873°E	SMF	360374	CO7A	MW443512	MW443913					this study
HE000604	52	181	Codringtonia	elisabethae	Korábek O.	2016	shell&origin	Greece: Peloponnese: near Tripoli, Rizes env.	37.4411°N 22.4873°E	SMF	360374	CO7B	MW443234						this study
HE000605	19	67	Helix	borealis	Korábek O.	2016	shell	Greece: Peloponnese: near Tripoli, Rizes env., quarry	37.4371°N 22.4794°E	NMBE	565400	BR6	MT949729	MT947404					Korábek et al. 2021
HE000606	52	197	Codringtonia	codringtonii	Korábek O.	2013	shell	Greece: Peloponnese: Petrochori, Nestor's cave	36.9600°N 21.6575°E	SMF	342527	CO1	KP072278	KP072196					Korábek et al. 2015
HE000607	52	181	Codringtonia	elisabethae	Korábek O.	2016	shell&origin	Greece: Peloponnese: Prosimna, canyon in direction Argos	37.7028°N 22.8246°E	SMF	360375	CO18A	MW443513	MW443914					this study
HE000608	52	187	Codringtonia	eucineta	Korábek O.	2016	shell	Greece: Peloponnese: road Sparti – Kalamata, Artemisia and Menina env.	37.0835°N 22.1579°E	SMF	360377	CO15A	MW443514	MW443915					this study
HE000609	52	187	Codringtonia	eucineta	Korábek O.	2016	shell	Greece: Peloponnese: road Sparti – Kalamata, Tripi env.	37.0955°N 22.3353°E	SMF	360378	CO8A	MW443515	MW443916					this study
HE000610	52	187	Codringtonia	eucineta	Korábek O.	2016	shell	Greece: Peloponnese: road Sparti – Kalamata, Tripi env.	37.0955°N 22.3353°E	SMF	360378	CO8B	MW443235						this study
HE000611	52	194	Codringtonia	eucineta	Korábek O.	2013	shell	Greece: Peloponnese: Selinountas env., valley of Selinous river	38.2181°N 22.0744°E	SMF	360379	CO2	MZ376665	MZ382601					Neiber et al. 2021
HE000612	24	89	Helix	lucorum	Korábek O.	2016	shell	Greece: Peloponnese: south of Vlachokerasia, near Ekklisia Agios Athanasios	37.3394°N 22.3683°E	NMP	P6M 30028	LC96	MG709065	MG709112					Korábek et al. 2018b
HE000613	19	67	Helix	borealis	Korábek O.	2016	shell	Greece: Peloponnese: Sparti env., by road to Anavriti	37.0352°N 22.4036°E	NMBE	565397	BR8A	MT949730						Korábek et al. 2021
HE000614	19	67	Helix	borealis	Korábek O.	2016	shell	Greece: Peloponnese: Sparti env., by road to Anavriti	37.0352°N 22.4036°E	NMBE	565397	BR8B	MT949731	MT947405					Korábek et al. 2021
HE000615	19	67	Helix	borealis	Korábek O.	2016	shell	Greece: Peloponnese: Sparti env., by road to Anavriti	37.0352°N 22.4036°E	NMBE	565397	BR8C	MT949732	MT947406					Korábek et al. 2021
HE000616	32	122	Helix	nucula	Korábek O.	2013	shell	Greece: Rhodes, road between Rhodes and Koskinou	36.4°N 28.2°E	SMF	214870/2	FG3	KP072300						Korábek et al. 2015	geographic coordinates only indicative
HE000617	14	51	Helix	fathallae	Korábek O.	2013	shell	Greece: Rhodos: Lindos, „Anhöhe Strasse 24“	36.09°N 28.08°E	NHMW	54189	FA10	MT949733						Korábek et al. 2015	geographic coordinates only indicative
HE000618	18	65	Helix	borealis	Korábek O.	2017	mtDNA	Greece: Sporades: Skyros, Agios Fokas isl. (site 30)	38.8612°N 24.4706°E	NHMC	50.36204	BR22A	MT949734	MT947407					Korábek et al. 2021	geographic coordinates only indicative
HE000619	18	65	Helix	borealis	Korábek O.	2017	mtDNA	Greece: Sporades: Skyros, Agios Fokas isl. (site 30)	38.8612°N 24.4706°E	NHMC	50.36204	BR22B	MT949735	MT947408	MW465490	MW446070			Korábek et al. 2021	geographic coordinates only indicative
HE000620	33	126	Helix	figulina	Korábek O.	2013	shell	Greece: Thessaly: Dimini, near Mycaenean tomb	39.3625°N 22.8906°E	SMF	342459	FG10	KF823042	KF823078					Korábek et al. 2015
HE000621	3	6	Helix	pelagonesica	Korábek O.	2014	shell	Greece: Thessaly: Mákrinitsa	39.4031°N 22.9908°E	SMF	342485	SR6	KP072400	KP072173		MW446071			Korábek et al. 2015
HE000622	55	206	Caucasotachea	vindobonensis	Korábek O.	2015	shell	Greece: Thessaly: near Stomio	39.8797°N 22.7198°E	NMP	P6M 29924	CP6	MK482778	MK482955					Korábek et al. 2020
HE000623	55	206	Caucasotachea	vindobonensis	Korábek O.	2015	shell	Greece: Thessaly: near Stomio	39.8797°N 22.7198°E	NMP	P6M 29924	CP42	MK482766	MK482943					Korábek et al. 2020
HE000624	33	126	Helix	figulina	Korábek O.	2016	shell	Greece: Thessaly: on road Chania – Portaria, near a watering place	39.3771°N 23.0300°E	SMF	360421	FG19	MW443516						this study
HE000625	5	19	Helix	thessalica	Korábek O.	2016	shell	Greece: Thessaly: Pelion Mts., Chania	39.3967°N 23.0603°E	NMP	P6M 30149	TH10	MK482895	MK483068					Korábek et al. 2020
HE000626	24	89	Helix	lucorum	Korábek O.	2013	shell	Greece: Thessaly: ravine between Agiokampos and Agia	39.6969°N 22.8203°E	NMP	P6M 30029	LC83	MG709075	MG709117					Korábek et al. 2018b
HE000627	55	206	Caucasotachea	vindobonensis	Korábek O.	2013	shell	Greece: Thessaly: ravine between Agiokampos and Agia	39.6969°N 22.8203°E	NMP	P6M 29925	CV2	MK482815	MK482989					Korábek et al. 2020
HE000628	18	64	Helix	borealis	Korábek O.	2013	shell	Greece: Thessaly: Skopelos island	39.1°N 23.7°E	NHMW	coll. van Regteren Altena	BR7	KP072263	KP072117					Korábek et al. 2015	geographic coordinates only indicative
HE000629	33	126	Helix	figulina	Korábek O.	2013	shell	Greece: Thessaly: Tirnavos env., „Enge zwischen Larissa und Elassona“	39.82°N 22.25°E	SMF	280626/2	FG4	KP072301						Korábek et al. 2015
HE000630	19	66	Helix	borealis	Korábek O.	2016	shell	Greece: West Greece: Kaiafas env., sand dunes by narrow-gauge railway	37.4973°N 21.6110°E	NMBE	565401	BR9A	MT949736	MT947409					Korábek et al. 2021
HE000631	19	66	Helix	borealis	Korábek O.	2016	shell	Greece: West Greece: Kaiafas env., sand dunes by narrow-gauge railway	37.4973°N 21.6110°E	NMBE	565401	BR9B	MT949737	MT947410					Korábek et al. 2021
HE000632	52	196	Codringtonia	eucineta	Korábek O.	2016	shell	Greece: West Greece: Kaiafas env., rocks on the opposite side of Limni Kaiafa	37.5231°N 21.5967°E	SMF	360380	CO12A	MW443517	MW443917					this study
HE000633	19	66	Helix	borealis	Korábek O.	2016	shell	Greece: West Greece: Kalavryta env., junction to Rogi	38.0534°N 22.1380°E	NMBE	565405	BR15A	MT949738	MT947411					Korábek et al. 2021
HE000634	19	66	Helix	borealis	Korábek O.	2016	shell	Greece: West Greece: Kalavryta env., junction to Rogi	38.0534°N 22.1380°E	NMBE	565405	BR15B	MT949739	MT947412					Korábek et al. 2021
HE000635	19	66	Helix	borealis	Korábek O.	2016	shell	Greece: West Greece: Kalavryta env., junction to Rogi	38.0534°N 22.1380°E	NMBE	565405	BR15C	MT949740	MT947413		MW446072			Korábek et al. 2021
HE000636	19	66	Helix	borealis	Korábek O.	2016	shell	Greece: West Greece: Kalavryta env., junction to Rogi	38.0534°N 22.1380°E	NMBE	565405	BR15D	MT949741						Korábek et al. 2021
HE000637	52	183	Codringtonia	intusplicata	Korábek O.	2016	shell	Greece: West Greece: Kalavryta env., junction to Rogi	38.0534°N 22.1380°E	SMF	360381	CO16A	MW443518	MW443918					this study
HE000638	52	183	Codringtonia	intusplicata	Korábek O.	2016	shell	Greece: West Greece: Kalavryta env., junction to Rogi	38.0534°N 22.1380°E	SMF	360381	CO16B	MW443236						this study
HE000639	19	66	Helix	borealis	Korábek O.	2016	shell	Greece: West Greece: Kato Retsina E of Aitoliko	38.4225°N 21.4336°E	NMBE	565406	BR10	MT949742	MT947414					Korábek et al. 2021
HE000640	19	68	Helix	borealis	Korábek O.	2011	shell	Greece: West Greece: Lake Amvrakia NE of Agrinio	38.75°N 21.18°E	SMF	coll. Schütt 370	BR4	KP072262	MT947415					Korábek et al. 2015	geographic coordinates only indicative
HE000641	19	66	Helix	borealis	Korábek O.	2016	shell	Greece: West Greece: Skalitina, on the road Karpenisi – Agrinio	38.8015°N 21.4990°E	NMBE	565410	BR13	MT949743	MT947416					Korábek et al. 2021
HE000642	24	89	Helix	lucorum	Korábek O.	2016	shell	Greece: West Macedonia: Spilaio near Grevena	40.005°N 21.285°E	NMP	P6M 30030	LC66	MG709091						Korábek et al. 2018b	geographic coordinates only indicative
HE000643	24	89	Helix	lucorum	Korábek O.	2016	shell	Greece: West Macedonia: Spilaio near Grevena	40.005°N 21.285°E	NMP	P6M 30030	LC69	MG709085						Korábek et al. 2018b	geographic coordinates only indicative
HE000644	9	27	Helix	schlaeflii	Korábek O.	2016	shell	Greece: West Macedonia: Spilaio near Grevena	40.0062°N 21.2884°E	SMF	360459	SH1	MW063530	MW066463					Korábek et al. 2021
HE000645	52	197	Codringtonia	codringtonii	Korábek O.	2014	shell	Greece: western Peloponnese: road from Kopanaki to Artiki	37.2686°N 21.7850°E	NMP	P6M 30484	CO4	MW443519			MW446073			this study
HE000646	11	36	Helix	thessalica	Korábek O.	2015	shell	Hungary: Bükk National Park, Szarvaskő env.	47.9996°N 20.3418°E	NMP	P6M 30150	PO10	MW443520	MW443919					this study
HE000647	11	36	Helix	pomatia	Korábek O.	2014	shell	Hungary: Bács-Kiskun County: Fülöpháza	46.8914°N 19.4458°E	SMF	346040	P_231	KT211753						Korábek et al. 2016
HE000648	11	38	Helix	pomatia	Korábek O.	2016	shell	Hungary: Bács-Kiskun County: Fülöpháza, dunes	46.8658°N 19.3992°E	NMP	P6M 29661	P_862	MF943727						Korábek et al. 2018a
HE000649	11	38	Helix	pomatia	Korábek O.	2016	shell	Hungary: Bács-Kiskun County: Kecskemét env., resting place on the M5 motorway	46.9234°N 19.6156°E	NMP	P6M 29662	P_902	MF943691						Korábek et al. 2018a
HE000650	55	205	Caucasotachea	vindobonensis	Korábek O.	2016	shell	Hungary: Bács-Kiskun County: Kecskemét env., resting place on the M5 motorway	46.9234°N 19.6156°E	NMP	P6M 29926	CV55	MK482847	MK483021					Korábek et al. 2020
HE000651	55	203	Caucasotachea	vindobonensis	Korábek O.	2016	shell	Hungary: Bács-Kiskun County: Kecskemét env., resting place on the M5 motorway	46.9234°N 19.6156°E	NMP	P6M 29926	CV101B	MK482787	MK482962					Korábek et al. 2020
HE000652	11	36	Helix	pomatia	Korábek O.	2016	shell	Hungary: Bács-Kiskun County: Lajosmizse, Shell gas station on the M5 motorway	47.0407°N 19.5693°E	NMP	P6M 29663	P_908	MF943696						Korábek et al. 2018a
HE000653	11	39	Helix	pomatia	Korábek O.	2016	shell	Hungary: Bács-Kiskun County: Petőfiszállás env., M.Petrol gas station on the M5 motorway	46.6081°N 19.8383°E	NMP	P6M 29664	P_906	MF943692						Korábek et al. 2018a
HE000654	11	39	Helix	pomatia	Korábek O.	2014	shell	Hungary: Bács-Kiskun County: Tiszaalpár	46.8249°N 19.9913°E	NMP	P6M 29681	P_411	MF943511	MF943979					Korábek et al. 2018a
HE000655	11	36	Helix	pomatia	Korábek O.	2014	shell	Hungary: Bács-Kiskun: pension Kondor Tanya between Szabadszállás and Kerekegyháza	46.9183°N 19.3980°E	NMP	P6M 29679	P_428	MF943512						Korábek et al. 2018a
HE000656	11	36	Helix	pomatia	Korábek O.	2016	shell	Hungary: Baranya county: Lánycsók env.	45.9962°N 18.6111°E	NMP	P6M 29665	P_828	MF943785	MF944035					Korábek et al. 2018a
HE000657	11	36	Helix	pomatia	Korábek O.	2016	shell	Hungary: Baranya county: Lánycsók env.	45.9962°N 18.6111°E	NMP	P6M 29665	P_515	MF943893						Korábek et al. 2018a
HE000658	55	203	Caucasotachea	vindobonensis	Korábek O.	2016	shell	Hungary: Baranya county: Lánycsók env.	45.9962°N 18.6111°E	NMP	P6M 29928	CV106	MK482792	MK482967					Korábek et al. 2020
HE000659	55	203	Caucasotachea	vindobonensis	Korábek O.	2016	shell	Hungary: Baranya county: Lánycsók env.	45.9962°N 18.6111°E	NMP	P6M 29928	CV108	MK482794	MK482969					Korábek et al. 2020
HE000660	11	36	Helix	pomatia	Korábek O.	2016	shell	Hungary: Baranya county: Túrony	45.9049°N 18.2305°E	NMP	P6M 29666	P_821	MF943786	MF944036					Korábek et al. 2018a
HE000661	55	203	Caucasotachea	vindobonensis	Korábek O.	2016	shell	Hungary: Baranya county: Túrony	45.9049°N 18.2305°E	NMP	P6M 29929	CV110	MK482797	MK482972					Korábek et al. 2020
HE000662	5	15	Helix	thessalica	Korábek O.	2015	shell&genital	Hungary: Borsod-Abaúj-Zemplén County: Mályinka	48.1477°N 20.4943°E	SMF	346095	P_228	KT211750	KT211704		KT211681			Korábek et al. 2016
HE000663	11	38	Helix	pomatia	Korábek O.	2014	shell	Hungary: Borsod-Abaúj-Zemplén County: Miskolc, Lillafüred	48.0961°N 20.6211°E	SMF	346041	P_402	KT211810						Korábek et al. 2016
HE000664	55	205	Caucasotachea	vindobonensis	Korábek O.	2016	shell	Hungary: Csongrád County: Szatymaz env, Mol gas station on the M5 motorway	46.3725°N 19.9996°E	NMP	P6M 29930	CV54	MK482846	MK483020					Korábek et al. 2020
HE000665	55	203	Caucasotachea	vindobonensis	Korábek O.	2016	shell	Hungary: Csongrád County: Szatymaz env, Mol gas station on the M5 motorway	46.3725°N 19.9996°E	NMP	P6M 29930	CV100B	MK482785	MK482961					Korábek et al. 2020
HE000666	11	36	Helix	pomatia	Korábek O.	2015	shell	Hungary: Fejér county: Csákberény, forest near cemetery	47.3572°N 18.3222°E	NMP	P6M 29668	P_700	MF943663	MF944008					Korábek et al. 2018a
HE000667	11	36	Helix	pomatia	Korábek O.	2016	shell	Hungary: Fejér county: Kisapostag	46.9069°N 18.9253°E	NMP	P6M 29669	P_830	MF943782	MF944033					Korábek et al. 2018a
HE000668	55	205	Caucasotachea	vindobonensis	Korábek O.	2016	shell	Hungary: Fejér county: Kisapostag	46.9069°N 18.9253°E	NMP	P6M 29931	CV98	MK482892	MK483066					Korábek et al. 2020
HE000669	55	205	Caucasotachea	vindobonensis	Korábek O.	2016	shell	Hungary: Fejér county: Kisapostag	46.9069°N 18.9253°E	NMP	P6M 29931	CV102	MK482788	MK482963					Korábek et al. 2020
HE000670	55	203	Caucasotachea	vindobonensis	Korábek O.	2015	shell	Hungary: gas station on highway M3 near Görbeháza	47.8010°N 21.1988°E	NMP	P6M 29932	CV44	MK482835	MK483009					Korábek et al. 2020
HE000671	55	205	Caucasotachea	vindobonensis	Korábek O.	2016	shell	Hungary: Győr-Moson-Sopron County: Győr env., OMV gas station on motorway M1	47.6336°N 17.6597°E	NMP	P6M 29933	CV47	MK482838	MK483012					Korábek et al. 2020
HE000672	11	38	Helix	pomatia	Korábek O.	2014	shell	Hungary: Heves County: Bükk NP, road to Felsőtárkány	48.0186°N 20.4692°E	SMF	346039	P_253	MF943495						Korábek et al. 2018a
HE000673	11	38	Helix	pomatia	Korábek O.	2014	shell	Hungary: Heves County: Bükk NP, road to Felsőtárkány	48.0186°N 20.4692°E	SMF	346039	P_400	KT211808						Korábek et al. 2016
HE000674	55	203	Caucasotachea	vindobonensis	Korábek O.	2014	shell	Hungary: Heves County: Eger env., road to Egerbakta	47.9190°N 20.3258°E	NMP	P6M 29934	CP30	MK482753	MK482930					Korábek et al. 2020
HE000675	11	36	Helix	pomatia	Korábek O.	2015	shell	Hungary: Heves County: Gyöngyöshalász, Batthyány Lajos St.	47.7409°N 19.9113°E	NMP	P6M 29671	P_598	MF943563						Korábek et al. 2018a
HE000676	11	38	Helix	pomatia	Korábek O.	2014	shell	Hungary: Heves County: Nagyvisnyó	48.1505°N 20.4540°E	NMP	P6M 29677	P_501	MF943497						Korábek et al. 2018a
HE000677	11	36	Helix	pomatia	Korábek O.	2015	shell	Hungary: Komárom-Esztegom county: Esztergom, Búbánatvölgy	47.8035°N 18.8088°E	NMP	P6M 29674	P_708	MF943666						Korábek et al. 2018a
HE000678	11	36	Helix	pomatia	Korábek O.	2015	shell	Hungary: Komárom-Esztegom county: Oroszlány, Majki-patak	47.4905°N 18.3453°E	NMP	P6M 29675	P_727	MF943664						Korábek et al. 2018a
HE000679	11	36	Helix	pomatia	Korábek O.	2015	shell	Hungary: Komárom-Esztegom county: Vertéstolna, foot of an limestone hill	47.6362°N 18.4427°E	NMP	P6M 29676	P_703	MF943665						Korábek et al. 2018a
HE000680	11	36	Helix	pomatia	Korábek O.	2015	shell	Hungary: Komárom-Esztegom county: Vertéstolna, foot of an limestone hill	47.6362°N 18.4427°E	NMP	P6M 29676	P_706	MF943872						Korábek et al. 2018a
HE000681	11	38	Helix	pomatia	Korábek O.	2014	shell	Hungary: Nógrád County: Kishartyán	48.0767°N 19.7375°E	NMP	P6M 29673	P_267	MF943496						Korábek et al. 2018a
HE000682	11	38	Helix	pomatia	Korábek O.	2014	shell	Hungary: Nógrád County: Szendehely near Vác	47.8586°N 19.1056°E	SMF	346042	P_307	KT211789						Korábek et al. 2016
HE000683	11	36	Helix	pomatia	Korábek O.	2015	shell	Hungary: Pest County: gas station on highway M3 between Mogyoród and Gödöllő	47.6058°N 19.2950°E	NMP	P6M 29670	P_603	MF943562						Korábek et al. 2018a
HE000684	55	205	Caucasotachea	vindobonensis	Korábek O.	2015	shell	Hungary: Pest County: gas station on highway M3 between Mogyoród and Gödöllő	47.6058°N 19.2950°E	no voucher		CP13	MK482736	MK482913					Korábek et al. 2020
HE000685	11	36	Helix	pomatia	Korábek O.	2013	shell	Hungary: Pest County: Herceghalom env., petrol station on highway M1	47.5106°N 18.7347°E	NMP	P6M 29672	P_11	MF943342	MF943959					Korábek et al. 2018a
HE000686	11	36	Helix	pomatia	Korábek O.	2015	shell	Hungary: Pest county: Kóspallag	47.8885°N 18.9295°E	NMP	P6M 29680	P_729	MF943667	MF944009					Korábek et al. 2018a
HE000687	11	36	Helix	pomatia	Korábek O.	2016	shell	Hungary: Tolna county: Paks, Danube bank	46.6202°N 18.8613°E	NMP	P6M 29682	P_8131	MF943783	MF944034					Korábek et al. 2018a
HE000688	55	205	Caucasotachea	vindobonensis	Korábek O.	2016	shell	Hungary: Tolna county: Paks, Danube bank	46.6202°N 18.8613°E	NMP	P6M 29936	CV103	MK482789	MK482964					Korábek et al. 2020
HE000689	55	205	Caucasotachea	vindobonensis	Korábek O.	2016	shell	Hungary: Tolna county: Paks, Danube bank	46.6202°N 18.8613°E	NMP	P6M 29936	CV104	MK482790	MK482965					Korábek et al. 2020
HE000690	11	36	Helix	pomatia	Korábek O.	2016	shell	Hungary: Tolna county: Szekszárd	46.3806°N 18.7199°E	NMP	P6M 29683	P_833	MF943784						Korábek et al. 2018a
HE000691	55	203	Caucasotachea	vindobonensis	Korábek O.	2016	shell	Hungary: Tolna county: Szekszárd	46.3806°N 18.7199°E	NMP	P6M 29937	CV112	MK482799	MK482974					Korábek et al. 2020
HE000692	55	203	Caucasotachea	vindobonensis	Korábek O.	2016	shell	Hungary: Tolna county: Szekszárd	46.3806°N 18.7199°E	NMP	P6M 29937	CV116	MK482803	MK482977					Korábek et al. 2020
HE000693	11	36	Helix	pomatia	Korábek O.	2015	shell	Hungary: Vas county: Csehimindszent, Széplak-patak	47.0422°N 16.9544°E	NMP	P6M 29684	P_704	MF943656						Korábek et al. 2018a
HE000694	11	36	Helix	pomatia	Korábek O.	2015	shell	Hungary: Vas county: Csempeszkopács	47.1551°N 16.8161°E	NMP	P6M 29685	P_739	MF943655						Korábek et al. 2018a
HE000695	11	36	Helix	pomatia	Korábek O.	2016	shell	Hungary: Vas county: Körmend	47.0010°N 16.6133°E	NMP	P6M 29686	P_850	MF943825	MF944059					Korábek et al. 2018a
HE000696	11	38	Helix	pomatia	Korábek O.	2016	shell	Hungary: Vas county: Körmend	47.0010°N 16.6133°E	NMP	P6M 29686	P_512	MF943917	MF944078					Korábek et al. 2018a
HE000697	11	36	Helix	pomatia	Korábek O.	2015	shell	Hungary: Vas county: Kőszeg Mountains, Velem	47.3464°N 16.4898°E	NMP	P6M 29687	P_701	MF943654						Korábek et al. 2018a
HE000698	11	36	Helix	pomatia	Korábek O.	2015	shell	Hungary: Veszprém county: Bánd, Essegvár	47.1207°N 17.7806°E	NMP	P6M 29688	P_702	MF943660						Korábek et al. 2018a
HE000699	11	36	Helix	pomatia	Korábek O.	2015	shell	Hungary: Veszprém county: Csesznek	47.3481°N 17.8854°E	NMP	P6M 29689	P_725	MF943662						Korábek et al. 2018a
HE000700	11	36	Helix	pomatia	Korábek O.	2015	shell	Hungary: Veszprém county: Gyulakeszi, Csobánc foot	46.8707°N 17.4939°E	NMP	P6M 29690	P_707	MF943658						Korábek et al. 2018a
HE000701	55	205	Caucasotachea	vindobonensis	Korábek O.	2015	shell	Hungary: Veszprém county: Gyulakeszi, Csobánc foot	46.8707°N 17.4939°E	NMP	P6M 29938	CP53	MK482775	MK482952					Korábek et al. 2020
HE000702	11	36	Helix	pomatia	Korábek O.	2015	shell	Hungary: Veszprém county: Kékkút	46.8504°N 17.5578°E	NMP	P6M 29691	P_728	MF943659	MF944007					Korábek et al. 2018a
HE000703	55	204	Caucasotachea	vindobonensis	Korábek O.	2015	shell	Hungary: Veszprém county: Kékkút	46.8504°N 17.5578°E	NMP	P6M 29939	CP31	MK482754	MK482931					Korábek et al. 2020
HE000704	11	38	Helix	pomatia	Korábek O.	2015	shell	Hungary: Veszprém county: Lókút	47.2065°N 17.8491°E	NMP	P6M 29692	P_709	MF943661						Korábek et al. 2018a
HE000705	11	36	Helix	pomatia	Korábek O.	2016	shell	Hungary: Zala county: Letenye env.	46.4196°N 16.7077°E	NMP	P6M 29693	P_849	MF943823	MF944058					Korábek et al. 2018a
HE000706	11	36	Helix	pomatia	Korábek O.	2015	shell	Hungary: Zala county: Várvölgy	46.8820°N 17.2937°E	NMP	P6M 29694	P_726	MF943657						Korábek et al. 2018a
HE000707	11	38	Helix	pomatia	Korábek O.	2016	shell	Hungary: Zala county: Zalabaksa, cemetery	46.6889°N 16.5366°E	NMP	P6M 29695	P_847	MF943824						Korábek et al. 2018a
HE000708	55	203	Caucasotachea	vindobonensis	Korábek O.	2016	shell	Hungary: Zala county: Zalabaksa, cemetery	46.6889°N 16.5366°E	NMP	P6M 29940	CV75	MK482867	MK483041					Korábek et al. 2020
HE000709	55	203	Caucasotachea	vindobonensis	Korábek O.	2016	shell	Hungary: Zala county: Zalabaksa, cemetery	46.6889°N 16.5366°E	NMP	P6M 29940	CV76	MK482868	MK483042					Korábek et al. 2020
HE000710	24	91	Helix	lucorum	Korábek O.	2013	shell	Iran: Āzarbāijān-e Sharqi Prov.: Kalībar (Kaleybar)	38.867°N 47.038°E	SMF	320167/5	LC54	KP072322						Korábek et al. 2015
HE000711	34	129	Helix	salomonica	Korábek O.	2013	shell	Iran: Ilam Prov.: Sarableh	33.78°N 46.62°E	NMBE	32735/18	SL4	KP072392						Korábek et al. 2015
HE000712	34	131	Helix	salomonica	Korábek O.	2013	shell	Iran: Ostān-e Āzarbāijān-e Gharbī: Urmia (Oroumiyeh)	37.6°N 45.1°E	SMF	75508/9	SL10	MW443521						this study	geographic coordinates only indicative
HE000713	34	131	Helix	salomonica	Korábek O.	2013	shell	Iran: Ostān-e Āzarbāijān-e Gharbī: Urmia (Oroumiyeh)	37.6°N 45.1°E	SMF	78218/13	SL11	KP072391						Korábek et al. 2015	geographic coordinates only indicative
HE000714	57	212	Caucasotachea	leucoranea	Korábek O.	2015	shell	Iran: Ostān-e Māzandarān: Kinj	36.4039°N 51.5144°E	NMP	P6M 30192	CA10	MW443522	MW443920	MW465522	MW446074	MW465467		this study
HE000715	57	216	Caucasotachea	leucoranea	Korábek O.	2013	shell	Iran: Rasht env., Lakan	37.2°N 49.6°E	NMBE	32738/1	CA5	KP072267						Korábek et al. 2015	geographic coordinates only indicative
HE000716	42	145	Levantina	spiriplana	Korábek O.	2016	shell	Israel: Jerusalem, near Golden Gate	31.7769°N 35.2375°E	SMF	360492	LV27	OL891811	OL862419					Korábek et al. in review
HE000717	36	133	Helix	engaddensis	Korábek O.	2013	shell	Israel: Nazareth: Basilica of the Annunciation	32.7025°N 35.2979°E	SMF	342505	EN6	KP072287						Korábek et al. 2015
HE000718	36	133	Helix	engaddensis	Korábek O.	2013	shell	Israel: Nazareth: Basilica of the Annunciation	32.7025°N 35.2979°E	SMF	342505	EN7	KP072288	KP072180		MW446075			Korábek et al. 2015
HE000719	42	148	Levantina	spiriplana	Korábek O.	2016	shell	West Bank: Samarian Hills, Mt. Gerizim, Atlantic terebinth trees near Giv'at Sne Ya'akov S of Nablus	32.1775°N 35.2672°E	SMF	360484	LV20	OL891812	OL862420					Korábek et al. in review	subsp. caesareana
HE000720	42	148	Levantina	spiriplana	Korábek O.	2016	shell	West Bank: Samarian Hills, Mt. Gerizim, Atlantic terebinth trees near Giv'at Sne Ya'akov S of Nablus	32.1775°N 35.2672°E	SMF	360484	LV21	OL891813	OL862421					Korábek et al. in review	subsp. caesareana
HE000721	42	148	Levantina	spiriplana	Korábek O.	2016	shell	West Bank: Samarian Hills, Mt. Gerizim, Atlantic terebinth trees near Giv'at Sne Ya'akov S of Nablus	32.1775°N 35.2672°E	SMF	360484	LV22	OL891814						Korábek et al. in review	subsp. caesareana
HE000722	42	148	Levantina	spiriplana	Korábek O.	2016	shell	West Bank: Samarian Hills, Qedumim (Kdumim)	32.2121°N 35.1571°E	SMF	360485	LV26	OL891815	OL862422	MW465520	MW446076	MW465468		Korábek et al. in review	subsp. caesareana	MW465458
HE000723	42	148	Levantina	spiriplana	Korábek O.	2016	shell	West Bank: Samarian Hills, Yizhar, Salman Farsi NR	32.1686°N 35.2328°E	SMF	360486	LV24	OL891816	OL862423					Korábek et al. in review	subsp. caesareana
HE000724	42	148	Levantina	spiriplana	Korábek O.	2016	shell	West Bank: Samarian Hills, Yizhar, Salman Farsi NR	32.1686°N 35.2328°E	SMF	360486	LV25	OL891817						Korábek et al. in review	subsp. caesareana
HE000725	42	149	Levantina	spiriplana	Korábek O.	2016	shell	Israel: Tel Aviv-Yafo: Tel Aviv University Botanical Garden, Noah Naftulski Garden	32.1142°N 34.8086°E	SMF	360487	LV23	OL891818	OL862424					Korábek et al. in review	shell shape corresponding to L. werneri (Kobelt, 1889)
HE000726	21	72	Helix	ligata	Korábek O.	2013	shell	Italy: Abruzzo: Fossa	42.2908°N 13.4886°E	SMF	342462	LG7	KF823043	KF823079					Korábek et al. 2014
HE000727	21	73	Helix	ligata	Korábek O.	2013	shell	Italy: Abruzzo: Micigliano env.	42.4453°N 13.0636°E	SMF	342463	LG6	KF823044	KF823080					Korábek et al. 2014
HE000728	21	73	Helix	ligata	Korábek O.	2013	shell	Italy: Abruzzo: Micigliano env.	42.4453°N 13.0636°E	SMF	342463	LG5	MW475269						this study
HE000729	4	9	Helix	straminea	Korábek O.	2013	shell	Italy: Abruzzo: Micigliano env.	42.4453°N 13.0636°E	SMF	341627	SR2	KF823066	KF823101		KT211695			Korábek et al. 2014, Korábek et al. 2016
HE000730	4	9	Helix	straminea	Korábek O.	2013	shell	Italy: Abruzzo: Ripe env.	42.7597°N 13.6347°E	SMF	341626	SR1	KF823069	KF823103					Korábek et al. 2014
HE000731	21	73	Helix	ligata	Korábek O.	2013	shell	Italy: Campania: Somma Vesuviana	40.86°N 14.43°E	SMF	24293	LG10	KP072326	KP072109					Korábek et al. 2015	geographic coordinates only indicative
HE000732	11	41	Helix	pomatia	Korábek O.	2016	shell	Italy: Friuli-Venezia Giulia: Brischis	46.1691°N 13.4922°E	NMP	P6M 29696	P_907	MF943698	MF944012					Korábek et al. 2018a
HE000733	11	36	Helix	pomatia	Korábek O.	2013	shell	Italy: Lombardy: Ambria	45.8099°N 9.6965°E	NMP	P6M 29697	P_13	MF943343						Korábek et al. 2018a
HE000734	11	36	Helix	pomatia	Korábek O.	2013	shell	Italy: Lombardy: between Varese and Ganna	45.8673°N 8.8333°E	NMP	P6M 29698	P_14	MF943348	MF943960					Korábek et al. 2018a
HE000735	11	36	Helix	pomatia	Korábek O.	2013	shell	Italy: Lombardy: Oltre il Colle near Zambla Alta	45.8809°N 9.7780°E	NMP	P6M 29699	P_17	MF943346						Korábek et al. 2018a
HE000736	11	36	Helix	pomatia	Korábek O.	2013	shell	Italy: Lombardy: Stravignino env.	45.7633°N 10.2233°E	NMP	P6M 29700	PO23	MF943332	MF943950					Korábek et al. 2018a
HE000737	11	41	Helix	pomatia	Korábek O.	2013	shell	Italy: Lombardy: Stravignino env., Mt. Mondero	45.7669°N 10.1658°E	NMP	P6M 29701	PO20	MF943331						Korábek et al. 2018a
HE000738	11	36	Helix	pomatia	Korábek O.	2013	shell	Italy: Piedmont: Forani env.	44.3067°N 7.2211°E	SMF	346043	PO7	KF823052	KF823088					Korábek et al. 2014
HE000739	11	36	Helix	pomatia	Korábek O.	2016	shell	Italy: Piemonte: Macugnaga, Pecetto	45.9716°N 7.9530°E	NMP	P6M 29704	P_463	MF943761	MF944027					Korábek et al. 2018a
HE000740	11	36	Helix	pomatia	Korábek O.	2016	shell	Italy: Piemonte: Macugnaga, Pecetto	45.9716°N 7.9530°E	NMP	P6M 29704	P_466	MF943891	MF944071					Korábek et al. 2018a
HE000741	11	42	Helix	pomatia	Korábek O.	2016	shell	Italy: Trentino-Alto Adige: Passo Cereda	46.1941°N 11.9142°E	NMP	P6M 29705	P_490	MF943732	MF944020					Korábek et al. 2018a
HE000742	11	36	Helix	pomatia	Korábek O.	2014	shell	Italy: Trentino-Alto Adige/Südtirol: Egna env.	46.3145°N 11.2880°E	NMP	P6M 29706	P_296	MF943539						Korábek et al. 2018a
HE000743	11	36	Helix	pomatia	Korábek O.	2013	shell	Italy: Trentino-Alto Adige/Südtirol: Loppio	45.8589°N 10.9231°E	NMP	P6M 29709	PO21	MF943330	MF943949					Korábek et al. 2018a
HE000744	11	36	Helix	pomatia	Korábek O.	2013	shell	Italy: Trentino-Alto Adige/Südtirol: San Felice	46.5011°N 11.1283°E	NMP	P6M 29708	P_09	MF943344						Korábek et al. 2018a
HE000745	11	36	Helix	pomatia	Korábek O.	2014	shell	Italy: Valle d'Aosta: Buisson	45.8376°N 7.6055°E	NMP	P6M 29710	P_278	MF943538	MF943990					Korábek et al. 2018a
HE000746	11	36	Helix	pomatia	Korábek O.	2014	shell	Italy: Valle d'Aosta: Buisson	45.8376°N 7.6055°E	NMP	P6M 29710	P_350	MF943856						Korábek et al. 2018a
HE000747	11	36	Helix	pomatia	Korábek O.	2013	shell	Italy: Valle d'Aosta: Nuarsaz env.	45.8397°N 7.6053°E	NMP	P6M 30529	PO6	KF823056	KF823092					Korábek et al. 2014
HE000748	14	48	Helix	cincta	Korábek O.	2013	shell	Italy: Veneto: Colà	45.4675°N 10.7558°E	no voucher		CN12	KF823037	KF823073					Korábek et al. 2014
HE000749	24	89	Helix	lucorum	Korábek O.	2013	shell	Italy: Veneto: Costermano	45.5856°N 10.7403°E	SMF	342475	LC37	KF823047	KF823083					Korábek et al. 2014
HE000750	14	48	Helix	cincta	Korábek O.	2013	shell	Italy: Veneto: Fontana Fredda env., Casa Allegra	45.4622°N 10.7275°E	NMBE	565424	CN13	MT949744						Korábek et al. 2021
HE000751	14	48	Helix	cincta	Korábek O.	2013	shell	Italy: Veneto: San Martino Buon Albergo	45.4281°N 11.1025°E	SMF	342451	CN11	KF823039	KF823075					Korábek et al. 2014
HE000752	4	10	Helix	vladika	Korábek O.	2013	shell	Kosovo: Peć/Pejë, road to Rožaje 2 km before border	42.77°N 20.28°E	NMBE	23347/2	VL14	KF823067						Korábek et al. 2014	geographic coordinates only indicative
HE000753	32	125	Helix	nucula	Korábek O.	2013	shell	Lebanon: Aghbe	34.0087°N 35.7108°E	NMBE	505494	PH1	KP072371	KP072105					Korábek et al. 2015	Helix pachya sensu Neubert 2014
HE000754	16	60	Helix	pronuba	Korábek O.	2013	shell	Libya: Cyrenaica: hill slope above Derna	32.75°N 22.62°E	NHMW		ME11	KP072339	MT947417					Korábek et al. 2015, Korábek et al. 2021	geographic coordinates only indicative
HE000755	16	58	Helix	pronuba	Korábek O.	2013	shell&mtDNA	Libya: Cyrenaika: Tocra env. (unreadable)	32.5°N 20.6°E	SMF	10393	ME4	KP072341	MT947418	MW465518	MW446077	MW465469		Korábek et al. 2015, Korábek et al. 2021	geographic coordinates only indicative
HE000756	16	57	Helix	pronuba	Korábek O.	2016	shell	Libya: Wadi el Maalegh SE of Martuba	32.5°N 22.8°E	NMBE	18496	ME17	MT949745	MT947419					Korábek et al. 2021	geographic coordinates only indicative
HE000757	16	56	Helix	pronuba	Korábek O.	2016	shell	Libya: Wadi el Maalegh SE of Martuba	32.5°N 22.8°E	NMBE	18497	ME18	MT949746						Korábek et al. 2021	geographic coordinates only indicative
HE000758	11	36	Helix	pomatia	Korábek O.	2014	shell	Lithuania: Stabulankiai, Apšavas Lake shore	55.5069°N 25.4503°E	SMF	346044	P_205	KT211739						Korábek et al. 2016
HE000759	11	36	Helix	pomatia	Korábek O.	2015	shell	Lithuania: western shore of lake Dusia near Stebuliai	54.3189°N 23.6500°E	NMP	P6M 29712	P_617	MF943596						Korábek et al. 2018a
HE000760	11	36	Helix	pomatia	Korábek O.	2015	shell	Luxembourg: Stroossen, Banzelterwee	49.6278°N 6.0819°E	NMP	P6M 29713	P_611	MF943608						Korábek et al. 2018a
HE000761	11	36	Helix	pomatia	Korábek O.	2015	shell	Luxembourg: Stroossen, Banzelterwee	49.6278°N 6.0819°E	NMP	P6M 29713	P_352	MF943869						Korábek et al. 2018a
HE000762	24	89	Helix	lucorum	Korábek O.	2013	shell	Macedonia: Demir Kapija, road E-75, ravine between tunnels	41.4065°N 22.2597°E	NMP	P6M 30031	LC84	MG709092						Korábek et al. 2018b
HE000763	1	1	Helix	philibinensis	Korábek O.	2013	shell	Macedonia: Demir Kapija, road E-75, ravine between tunnels	41.4065°N 22.2597°E	SMF	342511	PL5	KF823049	KF823085					Korábek et al. 2015
HE000764	5	18	Helix	thessalica	Korábek O.	2015	shell	Macedonia: Dramče env., church of Sv. Petka	42.0238°N 22.7232°E	SMF	342496	P_07	KP072366	KP072089		KT211680			Korábek et al. 2015, Korábek et al. 2016
HE000765	7	24	Helix	schlaeflii	Korábek O.	2013	shell	Macedonia: Galičica Mts., road to Magaro peak	40.95°N 20.82°E	NMBE	520400/2	SC10	KP072381			KT211690			Korábek et al. 2015, Korábek et al. 2016
HE000766	55	205	Caucasotachea	vindobonensis	Korábek O.	2013	shell	Macedonia: Golem Radobil env.	41.3858°N 21.7831°E	NMP	P6M 29941	CV12	MK482807	MK482981					Korábek et al. 2020
HE000767	3	4	Helix	pelagonesica	Korábek O.	2014	shell	Macedonia: Konečka Planina, road between Pepelište and Leskovica	41.5739°N 22.2247°E	SMF	342488	SR4	KP072398	KP072171					Korábek et al. 2015
HE000768	4	12	Helix	cf. straminea	Korábek O.	2013	shell	Macedonia: Korab Mountains: Karaula Strazimir, meadows near road	41.8063°N 20.6186°E	coll. Dedov I.		VLX1	KP072405	KP072092					Korábek et al. 2015
HE000769	4	8	Helix	cf. straminea	Korábek O.	2013	shell	Macedonia: Korab Mountains: Karaula Strazimir, meadows near road	41.8063°N 20.6186°E	coll. Dedov I.		VLX2	KP072406	KP072091					Korábek et al. 2015
HE000770	24	89	Helix	lucorum	Korábek O.	2013	shell	Macedonia: Kuklica env., Kameni Kukli	42.1036°N 22.0547°E	NMP	P6M 30032	LC58	MG709083						Korábek et al. 2018b
HE000771	1	1	Helix	philibinensis	Korábek O.	2016	shell	Macedonia: Letevci env. south of Katlanovo, motorway A1	41.8472°N 21.6992°E	SMF	360452	PL10	MW443523	MW443922					this study
HE000772	55	205	Caucasotachea	vindobonensis	Korábek O.	2016	shell	Macedonia: Letevci env. south of Katlanovo, motorway A1	41.8472°N 21.6992°E	NMP	P6M 29942	CV49	MK482840	MK483014					Korábek et al. 2020
HE000773	55	205	Caucasotachea	vindobonensis	Korábek O.	2016	shell	Macedonia: Letevci env. south of Katlanovo, motorway A1	41.8472°N 21.6992°E	NMP	P6M 29942	CV57	MK482849	MK483023					Korábek et al. 2020
HE000774	5	13	Helix	thessalica	Korábek O.	2015	shell	Macedonia: Maleševski Planina, Suvi Laki	41.5647°N 22.8422°E	SMF	346098	PO82	KT211836	KT211715		KT211687			Korábek et al. 2016
HE000775	5	13	Helix	thessalica	Korábek O.	2015	shell	Macedonia: Maleševski Planina, Suvi Laki	41.5647°N 22.8422°E	SMF	346098	P_24	KT211761	KT211705	MW465507				Korábek et al. 2016
HE000776	4	8	Helix	straminea	Korábek O.	2014	shell	Macedonia: Mavrovo NP	41.7187°N 20.5975°E	SMF	346089	SR7	KT211856						Korábek et al. 2016
HE000777	24	89	Helix	lucorum	Korábek O.	2013	shell	Macedonia: near Demir Kapija, by the Strumica river	41.4058°N 22.2667°E	NMP	P6M 30033	LC8	MG709067						Korábek et al. 2018b
HE000778	33	128	Helix	figulina	Korábek O.	2016	shell	Macedonia: Negotino, gas station of the A1 motorway	41.4994°N 22.0995°E	SMF	360423	FG14	MW443524	MW443923					this study
HE000779	24	89	Helix	lucorum	Korábek O.	2013	shell	Macedonia: Niže Polje near Bitola	41.0089°N 21.2447°E	NMP	P6M 30034	LC40	MG709057	MG709109					Korábek et al. 2018b
HE000780	24	89	Helix	lucorum	Korábek O.	2015	shell	Macedonia: Pepelište near Negotino	41.536°N 22.139°E	NMP	P6M 30334	LC56	MG709093						Korábek et al. 2018b
HE000781	55	205	Caucasotachea	vindobonensis	Korábek O.	2015	shell	Macedonia: Pepelište near Negotino	41.536°N 22.139°E	NMP	P6M 29943	CP8	MK482780	MK482957					Korábek et al. 2020
HE000782	24	89	Helix	lucorum	Korábek O.	2013	shell	Macedonia: Peštani (Lake Ohrid)	41.0142°N 20.8083°E	NMP	P6M 30035	LC31	MG709058						Korábek et al. 2018b
HE000783	4	12	Helix	dormitoris arnautorum	Korábek O.	2013	shell	Macedonia: Šar Planina, Ceripašina	42.00°N 20.85°E	coll. Dedov I.		DT13	KP072283						Korábek et al. 2015
HE000784	4	12	Helix	dormitoris arnautorum	Korábek O.	2013	shell	Macedonia: Šar Planina, Ceripašina	42.00°N 20.85°E	coll. Dedov I.		DT14	KP072284						Korábek et al. 2015
HE000785	4	12	Helix	dormitoris arnautorum	Korábek O.	2014	shell	Macedonia: Šar Planina, Titov Vrv	42.0033°N 20.7837°E	SMF	346020	DT15	KT211722	KT211698		KT211676			Korábek et al. 2016
HE000786	24	89	Helix	lucorum	Korábek O.	2014	shell	Macedonia: Stenje	40.9368°N 20.9199°E	NMP	P6M 30308	LC91	MG709094						Korábek et al. 2018b
HE000787	24	89	Helix	lucorum	Korábek O.	2016	shell	Macedonia: Veles Municipality, Vetersko env.	41.8147°N 21.6967°E	NMP	P6M 30036	LC67	MG709078						Korábek et al. 2018b
HE000788	4	8	Helix	straminea	Korábek O.	2013	shell	Macedonia: Žirovnica env.	41.6668°N 20.5975°E	SMF	341613	VL10	KF823071	KF823105					Korábek et al. 2014
HE000789	55	205	Caucasotachea	vindobonensis	Korábek O.	2013	shell	Macedonia: Zletovo	41.9997°N 22.2514°E	NMP	P6M 29945	CV10	MK482783	MK482960					Korábek et al. 2020
HE000790	8	26	Helix	dormitoris	Korábek O.	2015	shell&mtDNA	Montenegro: between Boričje and Trsa	43.1691°N 18.9201°E	SMF	360408	SP10	MW443525						this study
HE000791	8	26	Helix	vladika	Korábek O.	2015	shell	Montenegro: between Miloševići and Krnovo	42.9059°N 19.0908°E	SMF	360472	VL21	MW443526						this study
HE000792	8	26	Helix	vladika	Korábek O.	2015	shell	Montenegro: between Miloševići and Krnovo	42.9059°N 19.0908°E	SMF	360472	VL24	MW443237						this study
HE000793	5	13	Helix	thessalica	Korábek O.	2015	shell	Montenegro: between Polja and Bistrica	42.9979°N 19.4622°E	SMF	346099	PO24	KT211822						Korábek et al. 2016
HE000794	11	38	Helix	pomatia	Korábek O.	2013	shell	Montenegro: Cetinje, Orlov Krš	42.3856°N 18.9208°E	SMF	342491	DT10	KP072281	KP072084					Korábek et al. 2015
HE000795	11	38	Helix	pomatia	Korábek O.	2013	shell	Montenegro: Cetinje, Orlov Krš	42.3856°N 18.9208°E	SMF	342491	P_31	KT211791						Korábek et al. 2016
HE000796	11	38	Helix	pomatia	Korábek O.	2013	shell	Montenegro: Cetinje: Gruda	42.3800°N 18.9242°E	SMF	346045	P_15	KT211734						Korábek et al. 2016
HE000797	24	89	Helix	lucorum	Korábek O.	2015	shell	Montenegro: Donji Štoj, Ulcinjska solana and Zogajsko blato	41.92°N 19.30°E	NMP	P6M 30037	LC105	MG709095	MG709123					Korábek et al. 2018b	geographic coordinates only indicative
HE000798	8	26	Helix	dormitoris	Korábek O.	2016	shell	Montenegro: Durmitor Mts., Boričje	43.1075°N 19.0015°E	SMF	360409	DT18	MW443527						this study
HE000799	8	26	Helix	dormitoris	Korábek O.	2015	shell	Montenegro: Durmitor Mts., Ivan Do	43.1528°N 19.0923°E	SMF	360410	DT16	MW443528						this study
HE000800	8	26	Helix	dormitoris	Korábek O.	2013	shell	Montenegro: Durmitor, Zeleni Vir	43.1222°N 19.0383°E	SMF	342455	DT4	KF823041	KF823077					Korábek et al. 2014
HE000801	57	214	Caucasotachea	leucoranea	Korábek O.	2018	shell	Azerbaijan: Astara Rayon, between Ərçivan and Şuvi	38.503°N 48.803°E	NMP	P6M 30488	CA23	MW443577						this study
HE000802	4	10	Helix	vladika	Korábek O.	2013	shell	Montenegro: Gusinje	42.5777°N 19.8020°E	SMF	341615	H3D	KP072303						Korábek et al. 2015
HE000803	4	10	Helix	vladika	Korábek O.	2015	shell	Montenegro: Kolašin	42.8056°N 19.4944°E	SMF	360474	VL26	MW443529						this study
HE000804	4	10	Helix	vladika	Korábek O.	2013	shell	Montenegro: Kralje near Andrijevica	42.7381°N 19.7482°E	SMF	341618	VL7	KF823064	KF823100					Korábek et al. 2014
HE000805	4	10	Helix	vladika	Korábek O.	2016	shell	Montenegro: Liverovići env., Liverovičko jezero	42.74°N 19.06°E	SMF	360475	VL29B	MW443530	MW443924					this study	geographic coordinates only indicative
HE000806	4	10	Helix	vladika	Korábek O.	2016	shell	Montenegro: Liverovići env., Liverovičko jezero	42.74°N 19.06°E	SMF	360475	VL30	MW443238						this study	geographic coordinates only indicative
HE000807	10	34	Helix	secernenda	Korábek O.	2014	shell	Montenegro: Lovćen Mts.	42.40°N 18.84°E	SMF	346088	SC20	KT211840	KT211718		KT211693			Korábek et al. 2016	geographic coordinates only indicative
HE000808	10	34	Helix	secernenda	Korábek O.	2015	shell	Montenegro: Lovćen Mts.: “Međugorje” (Međuvršje?)	42.40°N 18.82°E	SMF	360468	SEC		MW443925	MW465508		MW465487		this study	geographic coordinates only indicative				MW194317		MW194301	MW194313	MW194309	MW194305
HE000809	55	204	Caucasotachea	vindobonensis	Korábek O.	2014	shell	Montenegro: Manastir Morača	42.7655°N 19.3910°E	NMP	P6M 29946	CV26red_	MK482820	MK482994					Korábek et al. 2020	geographic coordinates only indicative
HE000810	4	10	Helix	vladika	Korábek O.	2014	shell	Montenegro: Manastir Morača	42.7655°N 19.3910°E	SMF	346134	VL20	KT211857	KT211720		KT211696			Korábek et al. 2016
HE000811	55	204	Caucasotachea	vindobonensis	Korábek O.	2014	shell	Montenegro: Mrtvica canyon	42.73°N 19.36°E	NMP	P6M 29947	CV32	MK482826	MK483000	MW465505				Korábek et al. 2020	geographic coordinates only indicative
HE000812	4	10	Helix	vladika	Korábek O.	2013	shell	Montenegro: Ravna Rijeka	42.9835°N 19.7208°E	SMF	341617	VL12	KF823068	KF823102					Korábek et al. 2014
HE000813	4	10	Helix	vladika	Korábek O.	2013	shell	Montenegro: Vusanje env., beech forest	42.4899°N 19.8074°E	SMF	341614	VL9	KF823070	KF823104					Korábek et al. 2014
HE000814	10	29	Helix	secernenda	Korábek O.	2013	shell	Montenegro: Vusanje env., Zaston koliba, meadow with stones	42.4865°N 19.8191°E	SMF	342518	DT9xSC3_	KF823059	KF823095		KT211694			Korábek et al. 2014, Korábek et al. 2016
HE000815	8	26	Helix	dormitoris	Korábek O.	2013	shell	Montenegro: Žabljak, cemetery	43.1561°N 19.1233°E	SMF	342454	DT1	KP072280	KP072093		KT211675			Korábek et al. 2015, Korábek et al. 2016
HE000816	11	36	Helix	pomatia	Korábek O.	2014	shell	Netherlands: Haarlem, Zuid-Kennemerland National Park	52.3969°N 4.5928°E	SMF	346046	P_135	KT211732						Korábek et al. 2016
HE000817	11	36	Helix	pomatia	Korábek O.	2016	shell	Norway: Oslo: Langmyrgrenda barnehage	59.9645°N 10.7491°E	NMP	P6M 29716	P_863	MF943730	MF944018					Korábek et al. 2018a
HE000818	11	36	Helix	pomatia	Korábek O.	2016	shell	Norway: Oslo: Lillevannsskogen 81	59.9797°N 10.6554°E	no voucher		P_867	MF943729	MF944017					Korábek et al. 2018a
HE000819	11	36	Helix	pomatia	Korábek O.	2015	shell	Poland: Greater Poland Voivodeship: Poznań, Lasek Marceliński	52.3964°N 16.8294°E	NMP	P6M 29718	P_619	MF943633						Korábek et al. 2018a
HE000820	11	36	Helix	pomatia	Korábek O.	2015	shell	Poland: Lesser Poland Voivodeship: Grywałd	49.4457°N 20.3730°E	NMP	P6M 29719	P_344	MF943613						Korábek et al. 2018a
HE000821	11	36	Helix	pomatia	Korábek O.	2015	shell	Poland: Lesser Poland Voivodeship: Kasina Wielka	49.7052°N 20.1335°E	NMP	P6M 29724	P_593	MF943588						Korábek et al. 2018a
HE000822	11	36	Helix	pomatia	Korábek O.	2015	shell	Poland: Lesser Poland Voivodeship: Łąkta Górna	49.8332°N 20.4327°E	NMP	P6M 29725	P_590	MF943586						Korábek et al. 2018a
HE000823	11	36	Helix	pomatia	Korábek O.	2015	shell	Poland: Lesser Poland Voivodeship: Łapsze Wyżne	49.3941°N 20.1899°E	NMP	P6M 29721	P_608	MF943612						Korábek et al. 2018a
HE000824	11	36	Helix	pomatia	Korábek O.	2015	shell	Poland: Lesser Poland Voivodeship: Piekiełko	49.7463°N 20.3428°E	NMP	P6M 29726	P_452	MF943587						Korábek et al. 2018a
HE000825	11	36	Helix	pomatia	Korábek O.	2015	shell	Poland: Lesser Poland Voivodeship: Ropica Górna	49.5957°N 21.2361°E	NMP	P6M 29727	P_592	MF943585						Korábek et al. 2018a
HE000826	11	36	Helix	pomatia	Korábek O.	2015	shell	Poland: Lesser Poland Voivodeship: Sucha Beskidzka, Role	49.7373°N 19.5692°E	NMP	P6M 29729	P_596	MF943589						Korábek et al. 2018a
HE000827	11	36	Helix	pomatia	Korábek O.	2013	shell	Poland: Łodź Voivodeship: Tumidaj, direction Zapole	51.5127°N 18.6507°E	no voucher		P_18	MF943357	MF943964					Korábek et al. 2018a
HE000828	11	36	Helix	pomatia	Korábek O.	2014	shell	Poland: Lower Silesian Voivodeship: Bystrzyca Kłodzka	50.3147°N 16.6161°E	NMP	P6M 29723	P_321	MF943401	MF943974					Korábek et al. 2018a
HE000829	11	36	Helix	pomatia	Korábek O.	2015	shell	Poland: Lower Silesian Voivodeship: Wrocław, Pilczyce	51.1467°N 16.9607°E	NMP	P6M 29750	W01	MF943629						Korábek et al. 2018a
HE000830	11	36	Helix	pomatia	Korábek O.	2015	shell	Poland: Lublin Voivodeship: Szczebrzeszyn	50.6945°N 22.9758°E	no voucher		P_610	MF943625						Korábek et al. 2018a
HE000831	12	43	Helix	lutescens	Korábek O.	2015	shell	Poland: Lublin Voivodeship: Zamość	50.7146°N 23.2425°E	SMF	360432	LT66	MW443531						this study
HE000832	11	36	Helix	pomatia	Korábek O.	2015	shell	Poland: Lublin Voivodeship: Zamość	50.7146°N 23.2425°E	no voucher		P_630	MF943624						Korábek et al. 2018a
HE000833	11	36	Helix	pomatia	Korábek O.	2013	shell	Poland: Opole Voivodeship: Opole, cemetery	50.6753°N 17.8744°E	NMP	P6M 29732	PO64	MF943339	MF943957					Korábek et al. 2018a
HE000834	11	36	Helix	pomatia	Korábek O.	2013	shell	Poland: Opole Voivodeship: Opole, quarry "Piast", path to the diving point	50.6606°N 17.9472°E	NMP	P6M 29735	PO62	MF943338	MF943956					Korábek et al. 2018a
HE000835	11	36	Helix	pomatia	Korábek O.	2013	shell	Poland: Opole Voivodeship: Opole, Sudeckiej Dywizji Zmechanizowanej	50.6681°N 17.8778°E	NMP	P6M 29736	PO65	MF943340	MF943958					Korábek et al. 2018a
HE000836	11	36	Helix	pomatia	Korábek O.	2014	shell	Poland: Podlaskie Voivodeship: Augustów, Rospoda	53.8745°N 22.9887°E	NMP	P6M 29737	P_261	MF943521						Korábek et al. 2018a
HE000837	11	36	Helix	pomatia	Maltz T.	2013	shell	Poland: Podlaskie Voivodeship: Białowieża, park of the palace, in shrubs	52.70°N 23.83°E	no voucher		P_01	MF943349	MF943961					Korábek et al. 2018a	geographic coordinates only indicative
HE000838	11	36	Helix	pomatia	Korábek O.	2015	shell	Poland: Podlaskie Voivodeship: Bokiny, by Narew River	53.0415°N 22.9174°E	NMP	P6M 29739	P_715	MF943641						Korábek et al. 2018a
HE000839	11	36	Helix	pomatia	Korábek O.	2015	shell	Poland: Podlaskie Voivodeship: Michałowo	53.0359°N 23.6368°E	NMP	P6M 29740	P_723	MF943642						Korábek et al. 2018a
HE000840	11	36	Helix	pomatia	Korábek O.	2015	shell	Poland: Pomeranian Voivodeship: by Stino Lake W od Żukowo	54.3334°N 18.3051°E	NMP	P6M 29741	P_620	MF943632						Korábek et al. 2018a
HE000841	11	36	Helix	pomatia	Korábek O.	2015	shell	Poland: Pomeranian Voivodeship: Hel	54.5994°N 18.8128°E	NMP	P6M 29742	P_735	MF943674						Korábek et al. 2018a
HE000842	11	36	Helix	pomatia	Korábek O.	2015	shell	Poland: Pomeranian Voivodeship: Szpęgawskie Lake	54.0056°N 18.6042°E	NMP	P6M 29743	P_732	MF943675						Korábek et al. 2018a
HE000843	11	36	Helix	pomatia	Korábek O.	2014	shell	Poland: Silesian Voivodeship: Częstochowa	50.8253°N 19.1418°E	SMF	346047	P_264	KT211780	MF943982					Korábek et al. 2016, Korábek et al. 2018a
HE000844	11	36	Helix	pomatia	Korábek O.	2014	shell	Poland: Silesian Voivodeship: Częstochowa	50.8253°N 19.1418°E	SMF	346047	P_355	MF943854						Korábek et al. 2018a
HE000845	11	36	Helix	pomatia	Korábek O.	2015	shell	Poland: Silesian Voivodeship: Jaworze Górne, Szeroki potok	49.7917°N 18.9298°E	NMP	P6M 29744	P_597	MF943590						Korábek et al. 2018a
HE000846	11	36	Helix	pomatia	Korábek O.	2015	shell	Poland: Subcarpathian Voivodeship: above former Tworylne	49.2546°N 22.4647°E	no voucher		P_810	MF943619						Korábek et al. 2018a
HE000847	11	36	Helix	pomatia	Korábek O.	2015	shell	Poland: Subcarpathian Voivodeship: Chyrowa	49.5269°N 21.6170°E	NMP	P6M 29745	P_333	MF943628						Korábek et al. 2018a
HE000848	11	36	Helix	pomatia	Korábek O.	2015	shell	Poland: Subcarpathian Voivodeship: former Krywe	49.2501°N 22.5129°E	NMP	P6M 29746	P_626	MF943618	MF943999					Korábek et al. 2018a
HE000849	11	36	Helix	pomatia	Korábek O.	2015	shell	Poland: Subcarpathian Voivodeship: former Krywe	49.2501°N 22.5129°E	NMP	P6M 29746	P_346	MF943870						Korábek et al. 2018a
HE000850	11	36	Helix	pomatia	Korábek O.	2015	shell	Poland: Subcarpathian Voivodeship: Jarosław	50.0204°N 22.6842°E	no voucher		P_628	MF943621						Korábek et al. 2018a
HE000851	11	36	Helix	pomatia	Korábek O.	2015	shell	Poland: Subcarpathian Voivodeship: Królik Wołoski	49.5026°N 21.8122°E	NMP	P6M 29747	P_622	MF943614						Korábek et al. 2018a
HE000852	11	36	Helix	pomatia	Korábek O.	2015	shell	Poland: Subcarpathian Voivodeship: Liskowate	49.4924°N 22.6442°E	no voucher		P_624	MF943616						Korábek et al. 2018a
HE000853	11	36	Helix	pomatia	Korábek O.	2015	shell	Poland: Subcarpathian Voivodeship: Lutowiska	49.2514°N 22.6954°E	no voucher		P_338	MF943617						Korábek et al. 2018a
HE000854	12	43	Helix	lutescens	Korábek O.	2015	shell	Poland: Subcarpathian Voivodeship: Przemyśl	49.7809°N 22.7595°E	NMP	P6M 30298	LT65	MW443532						this study
HE000855	11	36	Helix	pomatia	Korábek O.	2015	shell	Poland: Subcarpathian Voivodeship: Przemyśl	49.7823°N 22.7610°E	no voucher		P_625	MF943620	MF944000					Korábek et al. 2018a
HE000856	11	36	Helix	pomatia	Korábek O.	2015	shell	Poland: Subcarpathian Voivodeship: Turzańsk	49.3692°N 22.1284°E	NMP	P6M 29748	P_809	MF943615	MF943998					Korábek et al. 2018a
HE000857	11	36	Helix	pomatia	Korábek O.	2015	shell	Poland: Subcarpathian Voivodeship: Wola Wielka	50.0421°N 23.2003°E	no voucher		P_807	MF943622						Korábek et al. 2018a
HE000858	11	36	Helix	pomatia	Korábek O.	2015	shell	Poland: Subcarpathian Voivodeship: Wólka Żmijowska	50.3094°N 23.3936°E	no voucher		P_805	MF943623						Korábek et al. 2018a
HE000859	11	36	Helix	pomatia	Korábek O.	2015	shell	Poland: Świętokrzyskie Voivodeship: Baranów Sandomieski	50.5017°N 21.5370°E	no voucher		P_623	MF943627						Korábek et al. 2018a
HE000860	55	203	Caucasotachea	vindobonensis	Korábek O.	2015	shell	Poland: Świętokrzyskie Voivodeship: Ossolin, castle ruins	50.6761°N 21.5036°E	no voucher		CP22	MK482745	MK482922					Korábek et al. 2020
HE000861	11	36	Helix	pomatia	Korábek O.	2015	shell	Poland: Świętokrzyskie Voivodeship: Sandomierz	50.6788°N 21.7446°E	no voucher		P_627	MF943626						Korábek et al. 2018a
HE000862	55	203	Caucasotachea	vindobonensis	Korábek O.	2015	shell	Poland: Świętokrzyskie Voivodeship: Sandomierz	50.6788°N 21.7446°E	no voucher		CP35	MK482759	MK482936					Korábek et al. 2020
HE000863	11	36	Helix	pomatia	Korábek O.	2013	shell	Poland: West Pomeranian Voivodeship: Szczecin, 3. Maja	53.4217°N 14.5500°E	NMP	P6M 29749	PO67	MF943335	MF943953					Korábek et al. 2018a
HE000864	11	38	Helix	pomatia	Korábek O.	2014	shell	Romania: Alba County: Alba Iulia, fortress	46.0632°N 23.5738°E	SMF	346048	P_326	KT211800						Korábek et al. 2016
HE000865	11	38	Helix	pomatia	Korábek O.	2014	shell	Romania: Alba County: Ampoița	46.1183°N 23.4481°E	SMF	346049	P_245	KT211766						Korábek et al. 2016
HE000866	11	39	Helix	pomatia	Korábek O.	2014	shell	Romania: Alba County: Câlnic	45.8897°N 23.6611°E	NMP	P6M 29751	P_271	MF943489						Korábek et al. 2018a
HE000867	11	38	Helix	pomatia	Korábek O.	2014	shell	Romania: Alba County: Câlnic	45.8897°N 23.6611°E	NMP	P6M 29751	P_505	MF943847						Korábek et al. 2018a
HE000868	55	203	Caucasotachea	vindobonensis	Korábek O.	2014	shell	Romania: Alba County: Câlnic	45.8897°N 23.6611°E	NMP	P6M 29948	CP24	MK482747	MK482924					Korábek et al. 2020
HE000869	11	36	Helix	pomatia	Korábek O.	2013	shell	Romania: Alba County: Gârda de Sus	46.45°N 22.81°E	NMP	P6M 29752	PO12	MF943324	MF943945					Korábek et al. 2018a	geographic coordinates only indicative
HE000870	11	36	Helix	pomatia	Korábek O.	2014	shell	Romania: Alba County: Ghețari	46.4891°N 22.8146°E	NMP	P6M 29753	P_224	MF943494						Korábek et al. 2018a
HE000871	11	38	Helix	thessalica	Korábek O.	2015	shell	Romania: Alba County: Lunca Ampoiței, Cheile Ampoiței, Peștera Liliecilor	46.1378°N 23.3933°E	SMF	346100	P_225	KT211748						Korábek et al. 2016
HE000872	55	205	Caucasotachea	vindobonensis	Korábek O.	2014	shell	Romania: Alba County: Lunca Ampoiței, Cheile Ampoiței, Peștera Liliecilor	46.1378°N 23.3933°E	NMP	P6M 29949	CP23	MK482746	MK482923					Korábek et al. 2020
HE000873	11	38	Helix	pomatia	Korábek O.	2014	shell	Romania: Alba County: Poșaga de Jos	46.4261°N 23.4544°E	NMP	P6M 29754	P_309	MF943493						Korábek et al. 2018a
HE000874	12	43	Helix	lutescens	Korábek O.	2013	shell	Romania: Alba County: Teiuş	46.198°N 23.682°E	SMF	342521	LT5	KP072329	KP072096					Korábek et al. 2015	geographic coordinates only indicative
HE000875	11	36	Helix	pomatia	Korábek O.	2014	shell	Romania: Alba County: Vadu Moților	46.3897°N 22.9778°E	SMF	346050	P_316	KT211795	MF943977					Korábek et al. 2016, Korábek et al. 2018a
HE000876	11	36	Helix	pomatia	Korábek O.	2014	shell	Romania: Alba County: Vârtop	46.5314°N 22.7850°E	SMF	346051	P_255	KT211776						Korábek et al. 2016
HE000877	11	39	Helix	pomatia	Korábek O.	2014	shell	Romania: Argeș County: Câmpulung, monastery	45.2639°N 25.0392°E	SMF	346052	P_254	KT211775						Korábek et al. 2016
HE000878	11	38	Helix	pomatia	Korábek O.	2014	shell	Romania: Argeș County: Cotmeana	44.9611°N 24.6206°E	SMF	346053	P_310	KT211792						Korábek et al. 2016
HE000879	5	15	Helix	thessalica	Korábek O.	2015	shell&genital	Romania: Argeș County: pass near Fundata	45.4375°N 25.2586°E	SMF	346101	P_252	KT211774						Korábek et al. 2016
HE000880	5	15	Helix	thessalica	Korábek O.	2015	shell	Romania: Argeș County: Podu Dâmboviței, limestone canyon	45.4153°N 25.2076°E	SMF	346102	P_240	KT211762		MW465515				Korábek et al. 2016
HE000881	5	15	Helix	thessalica	Korábek O.	2015	shell	Romania: Argeș County: Podu Dâmboviței, limestone canyon	45.4153°N 25.2076°E	SMF	346102	P_417	KT211815						Korábek et al. 2016
HE000882	5	15	Helix	thessalica	Korábek O.	2015	shell	Romania: Argeș County: Podu Dâmboviței, limestone canyon	45.4153°N 25.2076°E	SMF	346102	P_426	KT211812						Korábek et al. 2016
HE000883	11	38	Helix	pomatia	Korábek O.	2014	shell	Romania: Argeș County: Podu Dâmboviței, village	45.4137°N 25.2061°E	SMF	346054	P_233	KT211755						Korábek et al. 2016
HE000884	11	38	Helix	pomatia	Korábek O.	2014	shell	Romania: Argeș County: Podu Dâmboviței, village	45.4137°N 25.2061°E	SMF	346054	P_421	KT211813	MF944065					Korábek et al. 2016, Korábek et al. 2018a
HE000885	11	38	Helix	pomatia	Korábek O.	2014	shell	Romania: Argeș County: Podu Dâmboviței, village	45.4137°N 25.2061°E	SMF	346054	P_425	KT211814						Korábek et al. 2016
HE000886	24	89	Helix	lucorum	Korábek O.	2013	shell	Romania: Bacău County: Bacău, park	46.5611°N 26.9094°E	SMF	342464	BC31	KP072257	KP072124					Korábek et al. 2015
HE000887	12	43	Helix	lutescens	Korábek O.	2014	shell	Romania: Bacău County: Hemeiuș	46.6492°N 26.8386°E	NMP	P6M 30287	LT15	MW443533						this study
HE000888	55	205	Caucasotachea	vindobonensis	Korábek O.	2014	shell	Romania: Bacău County: Luncani	46.6142°N 26.7619°E	NMP	P6M 29951	CV60	MK482853	MK483027					Korábek et al. 2020
HE000889	12	43	Helix	lutescens	Korábek O.	2014	shell	Romania: Bacău County: near Bogdăneşti	46.2153°N 26.6594°E	NMP	P6M 30365	LT12	MW443534	MW443926					this study
HE000890	55	205	Caucasotachea	vindobonensis	Korábek O.	2014	shell	Romania: Bacău County: near Bogdăneşti	46.2153°N 26.6594°E	NMP	P6M 29952	CP36	MK482760	MK482937					Korábek et al. 2020
HE000891	12	43	Helix	lutescens	Korábek O.	2014	shell	Romania: Bacău County: Podu Turcului	46.1967°N 27.3744°E	NMP	P6M 30512	LT9	MW443535	MW443927					this study
HE000892	55	205	Caucasotachea	vindobonensis	Korábek O.	2014	shell	Romania: Bacău County: Podu Turcului	46.1967°N 27.3744°E	NMP	P6M 29953	CV23	MK482817	MK482991					Korábek et al. 2020
HE000893	24	89	Helix	lucorum	Korábek O.	2014	shell	Romania: Bacău County: Ștefan cel Mare	46.2150°N 26.8617°E	NMP	P6M 30038	LC90	MG709059						Korábek et al. 2018b
HE000894	55	205	Caucasotachea	vindobonensis	Korábek O.	2014	shell	Romania: Bacău County: Ștefan cel Mare	46.2150°N 26.8617°E	NMP	P6M 29954	CP34	MK482758	MK482935					Korábek et al. 2020
HE000895	55	205	Caucasotachea	vindobonensis	Korábek O.	2014	shell	Romania: Bacău County: Stejaru near Podiș and Grigoreni	46.5925°N 26.7017°E	NMP	P6M 29955	CV36	MK482829	MK483003		MW446078			Korábek et al. 2020
HE000896	12	43	Helix	lutescens	Korábek O.	2014	shell	Romania: Bihor County: Petreasa near Remetea	46.7047°N 22.3408°E	NMP	P6M 30297	LT16	MW443536						this study
HE000897	55	203	Caucasotachea	vindobonensis	Korábek O.	2014	shell	Romania: Bihor County: Petreasa near Remetea	46.7047°N 22.3408°E	no voucher		CP46	MK482770	MK482947					Korábek et al. 2020
HE000898	55	203	Caucasotachea	vindobonensis	Korábek O.	2014	shell	Romania: Bihor County: Rieni	46.5831°N 22.4361°E	NMP	P6M 29956	CP33	MK482757	MK482934					Korábek et al. 2020
HE000899	11	38	Helix	pomatia	Korábek O.	2014	shell	Romania: Bihor County: Roșia	46.8078°N 22.3986°E	SMF	346055	P_223	KT211747						Korábek et al. 2016
HE000900	55	203	Caucasotachea	vindobonensis	Korábek O.	2014	shell	Romania: Bihor County: Roșia	46.8078°N 22.3986°E	NMP	P6M 29957	CP41	MK482765	MK482942					Korábek et al. 2020
HE000901	11	38	Helix	pomatia	Korábek O.	2014	shell	Romania: Brașov County: Prejmer, fortified church	45.7211°N 25.7736°E	SMF	346056	P_266	KT211781						Korábek et al. 2016
HE000902	11	38	Helix	pomatia	Korábek O.	2014	shell	Romania: Brașov County: Prejmer, fortified church	45.7211°N 25.7736°E	SMF	346056	P_354	MF943851						Korábek et al. 2018a
HE000903	11	36	Helix	pomatia	Korábek O.	2014	shell	Romania: Brașov County: Râșnov, castle	45.5890°N 25.4673°E	SMF	346057	P_234	KT211756						Korábek et al. 2016
HE000904	12	43	Helix	lutescens	Korábek O.	2013	shell	Romania: Buzău County: Berca	45.286°N 26.683°E	no voucher		LT6	KP072330	KP072097		KT211677			Korábek et al. 2015, thess	geographic coordinates only indicative
HE000905	11	37	Helix	pomatia	Korábek O.	2013	shell	Romania: Caras-Severin county: Armeniş south of Caransebes	45.1900°N 22.3031°E	NMP	P6M 29755	CS3	MF943325	MF943946					Korábek et al. 2018a
HE000906	5	15	Helix	thessalica	Korábek O.	2015	shell	Romania: Caraș-Severin County: Băile Herculane, forest on limestone	44.8907°N 22.4229°E	SMF	346103	P_232	KT211754						Korábek et al. 2016
HE000907	11	38	Helix	pomatia	Korábek O.	2014	shell	Romania: Caraș-Severin County: Bozovici, by bridge over Nera	44.9183°N 22.0164°E	NMP	P6M 29756	P_314	MF943487						Korábek et al. 2018a
HE000908	55	203	Caucasotachea	vindobonensis	Korábek O.	2014	shell	Romania: Caraș-Severin County: Bozovici, by bridge over Nera	44.9183°N 22.0164°E	NMP	P6M 29958	CP40	MK482764	MK482941					Korábek et al. 2020
HE000909	11	36	Helix	pomatia	Korábek O.	2014	shell	Romania: Caraș-Severin County: Carașova, near the main road bridge	45.2009°N 21.8693°E	SMF	346058	P_242	KT211763						Korábek et al. 2016
HE000910	11	39	Helix	pomatia	Korábek O.	2014	shell	Romania: Caraș-Severin County: Carașova, near the main road bridge	45.2009°N 21.8693°E	SMF	346058	P_325	KT211799						Korábek et al. 2016
HE000911	11	36	Helix	pomatia	Korábek O.	2014	shell	Romania: Caraș-Severin County: Carașova, near the main road bridge	45.2009°N 21.8693°E	SMF	346058	P_340	MF943843						Korábek et al. 2018a
HE000912	55	203	Caucasotachea	vindobonensis	Korábek O.	2014	shell	Romania: Caraș-Severin County: Carașova, village	45.2011°N 21.8647°E	NMP	P6M 29959	CV40	MK482831	MK483005					Korábek et al. 2020
HE000913	11	37	Helix	pomatia	Korábek O.	2016	shell	Romania: Caraș-Severin County: Iabalcea env.	45.2092°N 21.9219°E	NMP		P_871	MF943728	MF944016					Korábek et al. 2018a
HE000914	11	39	Helix	pomatia	Korábek O.	2014	shell	Romania: Caraș-Severin County: Iablanița	44.9561°N 22.3081°E	SMF	346059	P_317	KT211796						Korábek et al. 2016
HE000915	11	39	Helix	pomatia	Korábek O.	2014	shell	Romania: Caraș-Severin County: Iablanița	44.9561°N 22.3081°E	SMF	346059	P_353	MF943844						Korábek et al. 2018a
HE000916	55	203	Caucasotachea	vindobonensis	Korábek O.	2014	shell	Romania: Caraș-Severin County: Iablanița	44.9561°N 22.3081°E	NMP	P6M 29961	CV61	MK482854	MK483028					Korábek et al. 2020
HE000917	11	37	Helix	pomatia	Korábek O.	2013	shell	Romania: Caras-Severin county: Jitin north of Oravita	45.1525°N 21.6792°E	NMP	P6M 29759	PO17	MF943327	MF943947					Korábek et al. 2018a
HE000918	55	203	Caucasotachea	vindobonensis	Korábek O.	2016	shell	Romania: Caraș-Severin County: Mehadia env., 4 km SE of Iablanița	44.9353°N 22.3378°E	NMP	P6M 29962	CV109	MK482795	MK482970					Korábek et al. 2020
HE000919	11	42	Helix	pomatia	Korábek O.	2014	shell	Romania: Caraș-Severin County: Moldova Veche	44.7259°N 21.6233°E	SMF	346060	P_258	KT211778						Korábek et al. 2016
HE000920	12	43	Helix	lutescens	Korábek O.	2014	shell	Romania: Cluj County: Turda env., Cheile Turzii	46.5631°N 23.6906°E	NMP	P6M 30288	LT13	MW443537						this study
HE000921	11	36	Helix	pomatia	Korábek O.	2014	shell	Romania: Covasna County: north-east of Oituz by Brețcu	46.0822°N 26.3967°E	SMF	346061	P_312	KT211794	MF943976					Korábek et al. 2016, Korábek et al. 2018a
HE000922	5	15	Helix	thessalica	Korábek O.	2015	shell	Romania: Covasna County: north-east of Oituz by Brețcu	46.0822°N 26.3967°E	SMF	346104	P_247	KT211768						Korábek et al. 2016
HE000923	12	43	Helix	lutescens	Korábek O.	2014	shell	Romania: Covasna County: Ojdula	45.9875°N 26.2644°E	NMP	P6M 30300	LT11	MW443538						this study
HE000924	55	203	Caucasotachea	vindobonensis	Korábek O.	2015	shell	Romania: Dolj County: Bâlta env.	44.5453°N 23.4508°E	NMP	P6M 29963	CP18	MK482741	MK482918					Korábek et al. 2020
HE000925	11	39	Helix	thessalica	Korábek O.	2015	shell	Romania: Gorj County: Mănăstirea Tismana	45.0817°N 22.9239°E	SMF	346105	P_238	KT211760						Korábek et al. 2016
HE000926	5	15	Helix	thessalica	Korábek O.	2015	shell	Romania: Gorj County: Runcu, canyon	45.1404°N 23.1352°E	SMF	346106	P_248	KT211769						Korábek et al. 2016
HE000927	5	15	Helix	thessalica	Korábek O.	2015	shell	Romania: Gorj County: Runcu, canyon	45.1404°N 23.1352°E	SMF	346106	P_324	KT211798						Korábek et al. 2016
HE000928	11	38	Helix	pomatia	Korábek O.	2014	shell	Romania: Hunedoara County: Densuș	45.5803°N 22.8047°E	NMP	P6M 29762	P_265	MF943488						Korábek et al. 2018a
HE000929	11	38	Helix	pomatia	Korábek O.	2014	shell	Romania: Hunedoara County: Densuș	45.5803°N 22.8047°E	NMP	P6M 29762	P_336	MF943846						Korábek et al. 2018a
HE000930	55	203	Caucasotachea	vindobonensis	Korábek O.	2014	shell	Romania: Hunedoara County: Densuș	45.5803°N 22.8047°E	NMP	P6M 29964	CP37	MK482761	MK482938					Korábek et al. 2020
HE000931	12	43	Helix	lutescens	Korábek O.	2014	shell	Romania: Hunedoara County: Hunedoara, Strada Castelului	45.7500°N 22.8889°E	NMP	P6M 30293	LT14	MW443539						this study
HE000932	11	38	Helix	pomatia	Korábek O.	2014	shell	Romania: Hunedoara County: Ponor, bridge over Strei	45.5042°N 23.1189°E	SMF	346062	P_237	KT211759						Korábek et al. 2016
HE000933	11	38	Helix	pomatia	Korábek O.	2014	shell	Romania: Hunedoara County: Ponor, bridge over Strei	45.5042°N 23.1189°E	SMF	346062	P_343	MF943845						Korábek et al. 2018a
HE000934	55	205	Caucasotachea	vindobonensis	Korábek O.	2014	shell	Romania: Hunedoara County: Ponor, bridge over Strei	45.5042°N 23.1189°E	NMP	P6M 29966	CP38	MK482762	MK482939					Korábek et al. 2020
HE000935	55	205	Caucasotachea	vindobonensis	Korábek O.	2014	shell	Romania: Hunedoara County: sand pit near Hășdat	45.7317°N 22.9342°E	NMP	P6M 29967	CV24	MK482818	MK482992					Korábek et al. 2020
HE000936	11	36	Helix	pomatia	Korábek O.	2015	shell	Romania: Maramureș County: Cicârlău	47.6895°N 23.4125°E	NMP	P6M 29763	P_447	MF943564						Korábek et al. 2018a
HE000937	55	203	Caucasotachea	vindobonensis	Korábek O.	2015	shell	Romania: Maramureș County: Seini	47.7343°N 23.3158°E	NMP	P6M 29968	CV42	MK482833	MK483007					Korábek et al. 2020
HE000938	55	203	Caucasotachea	vindobonensis	Korábek O.	2015	shell	Romania: Maramureș County: Seini	47.7343°N 23.3158°E	NMP	P6M 29968	CV43	MK482834	MK483008					Korábek et al. 2020
HE000939	11	39	Helix	thessalica	Korábek O.	2015	shell	Romania: Mehedinți County: Munții Mehedinți, Crovuri	45.0150°N 22.5614°E	SMF	346107	P_222	KT211746						Korábek et al. 2016
HE000940	55	203	Caucasotachea	vindobonensis	Korábek O.	2014	shell	Romania: Mehedinți County: Munții Mehedinți, Crovuri	45.0145°N 22.5599°E	NMP	P6M 29969	CP25	MK482748	MK482925					Korábek et al. 2020
HE000941	5	15	Helix	thessalica	Korábek O.	2015	shell	Romania: Mureș County: Eremitu	46.6600°N 24.9625°E	SMF, NMP	346108, P6M 30199	P_250	KT211772						Korábek et al. 2016
HE000942	55	205	Caucasotachea	vindobonensis	Korábek O.	2014	shell	Romania: Mureș County: Eremitu	46.6600°N 24.9625°E	NMP	P6M 29970	CV26	MK482819	MK482993					Korábek et al. 2020
HE000943	11	39	Helix	pomatia	Korábek O.	2014	shell	Romania: Mureș County: Recea	46.4631°N 24.4192°E	SMF	346063	P_269	KT211782						Korábek et al. 2016
HE000944	11	36	Helix	pomatia	Korábek O.	2014	shell	Romania: Mureș County: Recea	46.4631°N 24.4192°E	SMF	346063	P_334	MF943852						Korábek et al. 2018a
HE000945	11	36	Helix	pomatia	Korábek O.	2014	shell	Romania: Neamț County: Bicaz-Chei env., Cheile Șugăului	46.8259°N 25.8474°E	SMF	346064	P_235	KT211757						Korábek et al. 2016
HE000946	12	43	Helix	lutescens	Korábek O.	2014	shell	Romania: Neamț County: Bistrița, Vaduri	46.9397°N 26.2631°E	NMP	P6M 30302	LT40	MW443540						this study
HE000947	55	205	Caucasotachea	vindobonensis	Korábek O.	2014	shell	Romania: Neamț County: Bistrița, Vaduri	46.9397°N 26.2631°E	NMP	P6M 29971	CV41	MK482832	MK483006					Korábek et al. 2020
HE000948	5	15	Helix	thessalica	Korábek O.	2015	shell	Romania: Neamț County: Izvorul Muntelui	46.9511°N 26.0108°E	SMF	346109	P_246	KT211767						Korábek et al. 2016
HE000949	24	89	Helix	lucorum	Korábek O.	2014	shell	Romania: Neamț County: Roznov	46.8386°N 26.5058°E	NMP	P6M 30039	LC61	MG709079						Korábek et al. 2018b
HE000950	12	43	Helix	lutescens	Korábek O.	2014	shell	Romania: Neamț County: Roznov	46.8386°N 26.5058°E	NMP	P6M 30294	LT20	MW443541						this study
HE000951	55	205	Caucasotachea	vindobonensis	Korábek O.	2014	shell	Romania: Neamț County: Roznov	46.8386°N 26.5058°E	NMP	P6M 29972	CP29	MK482752	MK482929					Korábek et al. 2020
HE000952	12	43	Helix	lutescens	Korábek O.	2015	shell	Romania: Sălaj County: Dăbâceni	47.3082°N 23.5983°E	NMP	P6M 30295	LT64	MW443542						this study
HE000953	11	38	Helix	pomatia	Korábek O.	2015	shell	Romania: Sălaj County: Dăbâceni	47.3082°N 23.5983°E	NMP	P6M 29764	P_453	MF943565						Korábek et al. 2018a
HE000954	11	39	Helix	pomatia	Korábek O.	2015	shell	Romania: Sălaj County: Dăbâceni	47.3082°N 23.5983°E	NMP	P6M 29764	P_594	MF943861						Korábek et al. 2018a
HE000955	55	203	Caucasotachea	vindobonensis	Korábek O.	2015	shell	Romania: Sălaj County: Dăbâceni	47.3082°N 23.5983°E	NMP	P6M 29973	CP15	MK482738	MK482915					Korábek et al. 2020
HE000956	11	37	Helix	pomatia	Korábek O.	2014	shell	Romania: Sibiu County: Miercurea Sibiului	45.8894°N 23.7781°E	NMP	P6M 29765	P_320	MF943490						Korábek et al. 2018a
HE000957	55	205	Caucasotachea	vindobonensis	Korábek O.	2014	shell	Romania: Sibiu County: Miercurea Sibiului	45.8894°N 23.7781°E	no voucher		CP28	MK482751	MK482928					Korábek et al. 2020
HE000958	12	43	Helix	lutescens	Korábek O.	2015	shell	Romania: Suceava County: Dornești, by road to Siret	47.8825°N 26.0223°E	NMP	P6M 30292	LT63	MW443543						this study
HE000959	11	38	Helix	pomatia	Korábek O.	2015	shell	Romania: Suceava County: east of Câmpulung Moldovenesc	47.5155°N 25.6285°E	NMP	P6M 29766	P_600	MF943566						Korábek et al. 2018a
HE000960	11	38	Helix	pomatia	Korábek O.	2015	shell	Romania: Suceava County: east of Câmpulung Moldovenesc	47.5155°N 25.6285°E	NMP	P6M 29766	P_811	MF943862						Korábek et al. 2018a
HE000961	11	36	Helix	pomatia	Korábek O.	2015	shell	Romania: Suceava County: Sucevița, by road above village	47.7632°N 25.6610°E	NMP	P6M 29767	P_444	MF943567						Korábek et al. 2018a
HE000962	11	36	Helix	pomatia	Korábek O.	2015	shell	Romania: Suceava County: Sucevița, by road above village	47.7632°N 25.6610°E	NMP	P6M 29767	P_812	MF943863						Korábek et al. 2018a
HE000963	12	43	Helix	lutescens	Korábek O.	2014	shell	Romania: Timiș County: Lovrin, by railway to Tomnatic	45.9658°N 20.7286°E	NMP	P6M 30290	LT10	MW443544	MW443928					this study
HE000964	55	203	Caucasotachea	vindobonensis	Korábek O.	2014	shell	Romania: Timiș County: Lovrin, by railway to Tomnatic	45.9658°N 20.7286°E	NMP	P6M 29974	CP311	MK482755	MK482932					Korábek et al. 2020
HE000965	11	38	Helix	pomatia	Korábek O.	2014	shell	Romania: Timiș County: Șag	45.6350°N 21.1853°E	SMF	346138	P_306	KT211788	MF943975					Korábek et al. 2016, Korábek et al. 2018a
HE000966	11	36	Helix	pomatia	Korábek O.	2014	shell	Romania: Timiș County: Sânnicolau Mare, strada Drumul Cenadului	46.0819°N 20.6202°E	SMF	346065	P_249	KT211770						Korábek et al. 2016
HE000967	55	203	Caucasotachea	vindobonensis	Korábek O.	2014	shell	Romania: Timiș County: Sânnicolau Mare, strada Drumul Cenadului	46.0819°N 20.6202°E	NMP	P6M 29975	CP47	MK482771	MK482948					Korábek et al. 2020
HE000968	11	38	Helix	pomatia	Korábek O.	2013	shell	Romania: Timis County: Timişoara	45.7536°N 21.2953°E	NMP	P6M 29768	TM1	MF943326						Korábek et al. 2018a
HE000969	11	38	Helix	pomatia	Korábek O.	2014	shell	Romania: Vâlcea County: Blidari env., Mălureni	45.0611°N 24.4319°E	SMF	346137	P_328	KT211801						Korábek et al. 2016
HE000970	11	39	Helix	pomatia	Korábek O.	2014	shell	Romania: Vâlcea County: Blidari env., Mălureni	45.0611°N 24.4319°E	SMF	346137	P_332	MF943850						Korábek et al. 2018a
HE000971	55	205	Caucasotachea	vindobonensis	Korábek O.	2014	shell	Romania: Vâlcea County: Blidari env., Mălureni	45.0611°N 24.4319°E	NMP	P6M 29976	CP39	MK482763	MK482940					Korábek et al. 2020
HE000972	11	38	Helix	pomatia	Korábek O.	2014	shell	Romania: Vâlcea County: Dângești south of Perișani	45.2794°N 24.4231°E	SMF	346136	P_236	KT211758						Korábek et al. 2016
HE000973	11	38	Helix	pomatia	Korábek O.	2014	shell	Romania: Vâlcea County: Dângești south of Perișani	45.2794°N 24.4231°E	SMF	346136	P_347	MF943848						Korábek et al. 2018a
HE000974	11	36	Helix	pomatia	Korábek O.	2014	shell	Romania: Vâlcea County: Negreni	44.9786°N 24.9147°E	NMP	P6M 29769	P_270	MF943492						Korábek et al. 2018a
HE000975	11	38	Helix	pomatia	Korábek O.	2014	shell	Romania: Vâlcea County: south of Câinenii Mari	45.4719°N 24.2919°E	SMF	346135	P_318	KT211797						Korábek et al. 2016
HE000976	55	205	Caucasotachea	vindobonensis	Korábek O.	2014	shell	Romania: Vâlcea County: south of Câinenii Mari	45.4719°N 24.2919°E	NMP	P6M 29977	CP45	MK482769	MK482946					Korábek et al. 2020
HE000977	11	38	Helix	pomatia	Korábek O.	2014	shell	Romania: Vâlcea County: Tuțulești	45.4012°N 24.2985°E	NMP	P6M 29770	P_319	MF943491						Korábek et al. 2018a
HE000978	11	38	Helix	pomatia	Korábek O.	2014	shell	Romania: Vâlcea County: Tuțulești	45.4012°N 24.2985°E	NMP	P6M 29770	P_348	MF943849						Korábek et al. 2018a
HE000979	55	205	Caucasotachea	vindobonensis	Korábek O.	2016	shell	Russia: Belgorod Oblast: Novyy Oskol, garden in residential area	50.7581°N 37.8780°E	NMP	P6M 29978	CV95	MK482889	MK483063					Korábek et al. 2020
HE000980	55	205	Caucasotachea	vindobonensis	Korábek O.	2016	shell	Russia: Belgorod Oblast: Novyy Oskol, garden in residential area	50.7581°N 37.8780°E	NMP	P6M 29978	CV120	MK482808	MK482982					Korábek et al. 2020
HE000981	11	36	Helix	pomatia	Snegin E. A.	2015	shell	Russia: Belgorodskaya oblast: Belgorod, Seversky Donets flood plain	50.6106°N 36.6219°E	no voucher		P_584	MF943600						Korábek et al. 2018a	geographic coordinates only indicative
HE000982	11	36	Helix	pomatia	Snegin E. A.	2015	shell	Russia: Belgorodskaya oblast: Belgorod, Vezelka River	50.5942°N 36.5681°E	no voucher		P_583	MF943603						Korábek et al. 2018a	geographic coordinates only indicative
HE000983	11	36	Helix	pomatia	Snegin E. A.	2015	shell	Russia: Belgorodskaya oblast: Hotmyzhsk, forest in flood plain of Vorskla near Krasivo resort	50.5906°N 35.9031°E	no voucher		P_571	MF943601						Korábek et al. 2018a	geographic coordinates only indicative
HE000984	11	36	Helix	pomatia	Snegin E. A.	2015	shell	Russia: Belgorodskaya oblast: Maysky, ravine	50.5164°N 36.4544°E	no voucher		P_581	MF943602						Korábek et al. 2018a	geographic coordinates only indicative
HE000985	11	36	Helix	pomatia	Snegin E. A.	2015	shell	Russia: Belgorodskaya oblast: Maysky, ravine	50.5164°N 36.4544°E	no voucher		P_803	MF943867						Korábek et al. 2018a	geographic coordinates only indicative
HE000986	11	36	Helix	pomatia	Snegin E. A.	2015	shell	Russia: Belgorodskaya oblast: Shopino, forest in ravine near highway to Moscow	50.7164°N 36.4917°E	no voucher		P_576	MF943598						Korábek et al. 2018a	geographic coordinates only indicative
HE000987	5	15	Helix	thessalica	Korábek O.	2015	shell	Russia: Belgorodskaya oblast: Yablonovo near Valuyki env., flood plain of the Oskol River	50.2231°N 38.0097°E	coll. Snegin E.A.?		P_582	KT582748						Korábek et al. 2016	geographic coordinates only indicative
HE000988	24	89	Helix	lucorum	Korábek O.	2016	shell	Russia: Krasnodarsky kray: NE outskirts of Gelendzhik	44.5922°N 38.0589°E	NMP	P6M 30040	LC97	MG709072	MG709115					Korábek et al. 2018b
HE000989	11	36	Helix	pomatia	Snegin E. A.	2015	shell	Russia: Kurskaya oblast: Kursk	51.7567°N 36.1414°E	no voucher		P_575	MF943599						Korábek et al. 2018a	geographic coordinates only indicative
HE000990	55	205	Caucasotachea	vindobonensis	Korábek O.	2014	shell	Russia: Moscow Region: Lobnya	56.018°N 37.466°E	NMP	P6M 29979	CV19	MW443545	MW443929					this study
HE000991	55	205	Caucasotachea	vindobonensis	Korábek O.	2014	shell	Russia: Moscow Region: Lobnya	56.018°N 37.466°E	NMP	P6M 29979	VIND		MW443930	MW465509		MW465484		this study					MW194314		MW194298	MW194310	MW194306	MW194302
HE000992	11	36	Helix	pomatia	Korábek O.	2015	shell	Russia: Moscow, Izmaylovsky Park	55.78°N 37.79°E	NMP	P6M 30516	P_361	MW443546						this study
HE000993	11	36	Helix	pomatia	Korábek O.	2015	shell	Russia: Moscow, park of the Timiryazev Agricultural Academy	55.82°N 37.54°E	no voucher		P_362	MW443547						this study
HE000994	11	36	Helix	pomatia	Korábek O.	2015	shell	Russia: Moscow, park of the Timiryazev Agricultural Academy	55.82°N 37.54°E	no voucher		P_363	MW443239						this study
HE000995	24	89	Helix	lucorum	Korábek O.	2016	shell	Russia: Moscow: Sevastopolskiy prospekt, fence of the Institue of Theoretical and Experimental Physics	55.68°N 37.59°E	NMP	P6M 30041	LC94	MG709096						Korábek et al. 2018b	geographic coordinates only indicative
HE000996	11	36	Helix	pomatia	Snegin E. A.	2015	shell	Russia: Moskovskaya oblast: Bykovo env.	55.6364°N 38.1008°E	no voucher		P_585	MF943607						Korábek et al. 2018a	geographic coordinates only indicative
HE000997	11	36	Helix	pomatia	Korábek O.	2015	shell	Russia: Moskovskaya oblast: Malakhovka	55.6428°N 37.9980°E	NMP	P6M 30482	P_801	MW443548	MW443931					this study
HE000998	55	205	Caucasotachea	vindobonensis	Korábek O.	2015	shell	Russia: Moskovskaya oblast: Malakhovka	55.6428°N 37.9980°E	NMP	P6M 30483	CP58	MW443549	MW443932					this study
HE000999	55	205	Caucasotachea	vindobonensis	Korábek O.	2016	shell	Russia: Moskovskaya oblast: Pushchino, Institutskaya Street and Gruzovaya Street	54.8328°N 37.6154°E	NMP	P6M 29980	CV65	MW443550						this study
HE001000	55	205	Caucasotachea	vindobonensis	Korábek O.	2016	shell	Russia: Moskovskaya oblast: Pushchino, Institutskaya Street and Gruzovaya Street	54.8328°N 37.6154°E	NMP	P6M 29980	CV66	MW443240	MW443933					this study
HE001001	11	36	Helix	pomatia	Korábek O.	2015	shell	Russia: Samarskaya Oblast: Zhigulëvskii zapovednik, Bakhilova Polyana	53.44°N 49.66°E	no voucher		P_358	MW443551						this study
HE001002	11	36	Helix	pomatia	Korábek O.	2015	shell	Russia: Samarskaya Oblast: Zhigulëvskii zapovednik, Bakhilova Polyana	53.44°N 49.66°E	no voucher		P_359	MW443241						this study
HE001003	11	36	Helix	pomatia	Korábek O.	2015	shell	Russia: Samarskaya Oblast: Zhigulëvskii zapovednik, Bakhilova Polyana	53.44°N 49.66°E	no voucher		P_360	MW443242						this study
HE001004	11	36	Helix	pomatia	Snegin E. A.	2015	shell	Russia: Tverskaya oblast: Tver, park near Tver Carriage Works	56.8617°N 35.9031°E	no voucher		P_577	MF943597						Korábek et al. 2018a	geographic coordinates only indicative
HE001005	5	15	Helix	thessalica	Korábek O.	2015	shell&genital	Russia: Ulyanovskaya oblast: Ulyanovsk (Simbirsk), Vinnovskaya roshcha	54.2720°N 48.3438°E	NMP	P6M 30151	P_578	KT582749						Korábek et al. 2016
HE001006	5	15	Helix	thessalica	Korábek O.	2015	shell&genital	Russia: Ulyanovskaya oblast: Ulyanovsk (Simbirsk), Vinnovskaya roshcha	54.2720°N 48.3438°E	NMP	P6M 30151	P_589	KT582750						Korábek et al. 2016
HE001007	55	205	Caucasotachea	vindobonensis	Korábek O.	2016	shell	Serbia: Nišava Distr.: Aleksinac	43.5307°N 21.7092°E	NMP	P6M 29981	CV51	MK482843	MK483017					Korábek et al. 2020
HE001008	11	39	Helix	pomatia	Korábek O.	2013	shell	Serbia: Beograd, gas station on the road E-75	44.7808°N 20.4952°E	SMF	346066	PO1	KT211819	KT211709					Korábek et al. 2016
HE001009	11	38	Helix	pomatia	Korábek O.	2015	shell	Serbia: Beograd, Kosančićev venac	44.8175°N 20.4509°E	NMP	P6M 29771	P_808	MF943679						Korábek et al. 2018a
HE001010	11	38	Helix	pomatia	Korábek O.	2016	shell	Serbia: Beograd: Đurinci env., by railway	44.5078°N 20.6341°E	NMP	P6M 29772	P_901	MF943694						Korábek et al. 2018a
HE001011	11	39	Helix	pomatia	Korábek O.	2016	shell	Serbia: Beograd: Đurinci env., by railway	44.5078°N 20.6341°E	NMP	P6M 29772	P_861	MF943878	MF944069					Korábek et al. 2018a
HE001012	55	203	Caucasotachea	vindobonensis	Korábek O.	2016	shell	Serbia: Beograd: Đurinci env., by railway	44.5078°N 20.6341°E	NMP	P6M 29982	CV53	MK482845	MK483019					Korábek et al. 2020
HE001013	55	203	Caucasotachea	vindobonensis	Korábek O.	2016	shell	Serbia: Beograd: Đurinci env., by railway	44.5078°N 20.6341°E	NMP	P6M 29982	CV105	MK482791	MK482966					Korábek et al. 2020
HE001014	11	42	Helix	pomatia	Korábek O.	2013	shell	Serbia: Bor Distr.: Boljetin env., Lepenski Vir	44.5517°N 22.0275°E	SMF	342520	PO42	KF823053	KF823089					Korábek et al. 2014
HE001015	11	38	Helix	pomatia	Korábek O.	2014	shell	Serbia: Bor Distr.: NP Đerdap, NE of Donji Milanovac	44.60°N 22.30°E	SMF	346070	P_143	KT211733						Korábek et al. 2016
HE001016	11	38	Helix	pomatia	Korábek O.	2014	shell	Serbia: Bor Distr.: NP Đerdap, NE of Donji Milanovac	44.60°N 22.30°E	SMF	346070	P_364	MF943840						Korábek et al. 2018a
HE001017	11	39	Helix	pomatia	Korábek O.	2013	shell	Serbia: Braničevo Distr.: Golubac, Golubački grad	44.6603°N 21.6772°E	SMF	346068	PO52	KT211831						Korábek et al. 2016
HE001018	4	10	Helix	vladika	Korábek O.	2013	shell	Serbia: Duga Poljana env., beech forest	43.3259°N 20.2391°E	SMF	341619	VL13	KF823061	KF823097					Korábek et al. 2014
HE001019	24	89	Helix	lucorum	Korábek O.	2015	shell	Serbia: highway north of Ćuprija	43.953°N 21.367°E	NMP	P6M 30042	LC104	MG709097	MG709124					Korábek et al. 2018b
HE001020	4	10	Helix	vladika	Korábek O.	2013	shell	Serbia: Pirot Distr.: Jelovica	43.2057°N 22.8312°E	SMF	341612	VL8	KF823062	KF823098					Korábek et al. 2014
HE001021	24	89	Helix	lucorum	Korábek O.	2013	shell	Serbia: Knjaževac env., Trgovište	43.5385°N 22.2866°E	NMP	P6M 30043	LC50	MG709098						Korábek et al. 2018b
HE001022	11	39	Helix	cf. vladika	Korábek O.	2013	shell	Serbia: Knjaževac env., Trgovište	43.5385°N 22.2866°E	SMF	341629	VL5	MW475268						this study	isolate VL5 probably corresponds to fig. 3D in Korábek et al. 2014, there is a chance that it could actually be H. pomatia or an admixed individual; see also comment for isolate PO31
HE001023	4	10	Helix	vladika	Korábek O.	2013	shell	Serbia: Knjaževac env., Trgovište	43.5385°N 22.2866°E	SMF	341629	VL6	KF823063	KF823099					Korábek et al. 2014	geographic coordinates only indicative
HE001024	8	26	Helix	dormitoris	Korábek O.	2015	shell	Serbia: Kremna env.	43.8455°N 19.5736°E	SMF	360412	DT17	MW443552						this study
HE001025	4	11	Helix	vladika	Korábek O.	2015	shell	Serbia: Mačva Dist.: Mali Zvornik	44.3822°N 19.1077°E	NMP	P6M 30485	VL22A	MW443553	MW443934					this study
HE001026	24	89	Helix	lucorum	Korábek O.	2013	shell	Serbia: Nišava Distr.: Bovan env., Bovanska Klisura	43.6253°N 21.7083°E	NMP	P6M 30044	LC57	MG709073						Korábek et al. 2018b
HE001027	5	13	Helix	thessalica	Korábek O.	2015	shell	Serbia: Nišava Distr.: Bovan env., Bovanska Klisura	43.6253°N 21.7083°E	SMF	346114	P_10	KT211726						Korábek et al. 2016
HE001028	55	205	Caucasotachea	vindobonensis	Korábek O.	2013	shell	Serbia: Nišava Distr.: Bovan env., Bovanska Klisura	43.6253°N 21.7083°E	NMP	P6M 29984	CV4	MK482830	MK483004					Korábek et al. 2020
HE001029	5	18	Helix	thessalica	Korábek O.	2015	shell	Serbia: Nišava Distr.: Donji Dušnik, near Niš	43.1548°N 22.1138°E	SMF	346118	P_207	KT211740	KT211703					Korábek et al. 2016
HE001030	24	89	Helix	lucorum	Korábek O.	2013	shell	Serbia: Nišava Distr.: Sićevo, Manastir Sv. Bogorodice	43.3294°N 22.0717°E	NMP	P6M 30045	LC81	MG709064	MG709111					Korábek et al. 2018b
HE001031	5	13	Helix	thessalica	Korábek O.	2015	shell	Serbia: Nišava Distr.: Sićevo, Manastir Sv. Bogorodice	43.3294°N 22.0717°E	SMF	346122	P_403	KT211811	MW443935					Korábek et al. 2016
HE001032	55	203	Caucasotachea	vindobonensis	Korábek O.	2013	shell	Serbia: Nišava Distr.: Sićevo, near railway	43.3314°N 22.0678°E	NMP	P6M 29985	CV5	MK482841	MK483015					Korábek et al. 2020
HE001033	55	203	Caucasotachea	vindobonensis	Korábek O.	2013	shell	Serbia: Nišava Distr.: Sićevo, near railway	43.3314°N 22.0678°E	NMP	P6M 29985	CP54	MK482776	MK482953					Korábek et al. 2020
HE001034	5	13	Helix	thessalica	Korábek O.	2015	shell	Serbia: Pirot Distr.: Jelovica	43.2057°N 22.8312°E	SMF	342519	PO33	KP072377	KP072090					Korábek et al. 2015
HE001035	5	13	Helix	thessalica	Korábek O.	2015	shell	Serbia: Pirot Distr.: Rsovci	43.1754°N 22.7460°E	SMF	346121	PO54	KT211832						Korábek et al. 2016
HE001036	5	13	Helix	thessalica	Korábek O.	2015	shell	Serbia: Pirot Distr.: Temska	43.2796°N 22.5256°E	SMF	346123	PO41	KT211827	KT211712					Korábek et al. 2016
HE001037	11	39	Helix	pomatia	Korábek O.	2014	shell	Serbia: Podunavlje Distr.: Kolari S of Smederevo	44.5758°N 20.8935°E	SMF	346069	P_210	KT211742						Korábek et al. 2016
HE001038	5	13	Helix	thessalica	Korábek O.	2015	shell	Serbia: Pomoravlje Distr.: between Dragocvet and Suljkovac	43.9211°N 21.2056°E	SMF	346111	P_04	KT211725						Korábek et al. 2016
HE001039	55	205	Caucasotachea	vindobonensis	Korábek O.	2013	shell	Serbia: Pomoravlje Distr.: between Dragocvet and Suljkovac	43.9211°N 21.2056°E	NMP	P6M 30517	CV8	MK482872	MK483046					Korábek et al. 2020
HE001040	24	89	Helix	lucorum	Korábek O.	2013	shell	Serbia: road E75 near Džep	42.7500°N 22.0694°E	NMP	P6M 30046	LC33	MG709077						Korábek et al. 2018b
HE001041	11	38	Helix	pomatia	Korábek O.	2015	shell	Serbia: Srem Dist.: Zasavica I. env.	44.9612°N 19.5230°E	NMP	P6M 29776	P_629	MF943609						Korábek et al. 2018a
HE001042	11	36	Helix	pomatia	Korábek O.	2014	shell	Serbia: Srem Distr.: Fruška Gora, Staro Hopovo monastery	45.1354°N 19.8584°E	SMF	346067	P_256	KT211777	MF943971					Korábek et al. 2016, Korábek et al. 2018a
HE001043	11	38	Helix	pomatia	Korábek O.	2013	shell	Serbia: Srem Distr.: Grabovci	44.7599°N 19.8814°E	NMP	P6M 29773	PO53	MF943334						Korábek et al. 2018a
HE001044	11	39	Helix	pomatia	Korábek O.	2013	shell	Serbia: Srem Distr.: Obrež env., Obed	44.7420°N 19.9989°E	SMF	346071	PO28	KT211823	KT211711					Korábek et al. 2016
HE001045	4	10	Helix	vladika	Korábek O.	2015	shell	Serbia: Tara National Park, south of Bajina Bašta II.	43.8996°N 19.5219°E	SMF	360478	VL23	MW443554						this study
HE001046	24	89	Helix	lucorum	Korábek O.	2016	shell	Serbia: Vladičin Han env., Južna Morava river bank	42.6945°N 22.0644°E	NMP	P6M 30047	LC65	MG709099						Korábek et al. 2018b
HE001047	55	205	Caucasotachea	vindobonensis	Korábek O.	2016	shell	Serbia: Vladičin Han env., Južna Morava river bank	42.6945°N 22.0644°E	NMP	P6M 29986	CV50	MK482842	MK483016					Korábek et al. 2020
HE001048	55	205	Caucasotachea	vindobonensis	Korábek O.	2016	shell	Serbia: Vladičin Han env., Južna Morava river bank	42.6945°N 22.0644°E	NMP	P6M 29986	CV90	MK482884	MK483058					Korábek et al. 2020
HE001049	11	42	Helix	pomatia	Korábek O.	2016	shell	Serbia: Vojvodina: Bačka Topola, by railway	45.8215°N 19.6502°E	NMP	P6M 29777	P_905	MF943693						Korábek et al. 2018a
HE001050	11	42	Helix	pomatia	Korábek O.	2016	shell	Serbia: Vojvodina: Bačka Topola, by railway	45.8215°N 19.6502°E	NMP	P6M 29777	P_894	MF943877						Korábek et al. 2018a
HE001051	55	203	Caucasotachea	vindobonensis	Korábek O.	2016	shell	Serbia: Vojvodina: Bačka Topola, by railway	45.8215°N 19.6502°E	NMP	P6M 29987	CV56	MK482848	MK483022					Korábek et al. 2020
HE001052	55	203	Caucasotachea	vindobonensis	Korábek O.	2016	shell	Serbia: Vojvodina: Bačka Topola, by railway	45.8215°N 19.6502°E	NMP	P6M 29987	CV87	MK482880	MK483054					Korábek et al. 2020
HE001053	11	39	Helix	pomatia	Korábek O.	2016	shell	Serbia: Vojvodina: between Čurug and Bačko Gradište	45.4987°N 20.0338°E	NMP	P6M 29778	P_903	MF943695						Korábek et al. 2018a
HE001054	11	39	Helix	pomatia	Korábek O.	2016	shell	Serbia: Vojvodina: between Čurug and Bačko Gradište	45.4987°N 20.0338°E	NMP	P6M 29778	P_896	MF943879						Korábek et al. 2018a
HE001055	55	205	Caucasotachea	vindobonensis	Korábek O.	2016	shell	Serbia: Vojvodina: between Čurug and Bačko Gradište	45.4987°N 20.0338°E	NMP	P6M 29988	CV52	MK482844	MK483018					Korábek et al. 2020
HE001056	55	205	Caucasotachea	vindobonensis	Korábek O.	2016	shell	Serbia: Vojvodina: between Čurug and Bačko Gradište	45.4987°N 20.0338°E	NMP	P6M 29988	CV58	MK482850	MK483024					Korábek et al. 2020
HE001057	5	13	Helix	thessalica	Korábek O.	2015	shell	Serbia: Zaječar Distr.: Crni Vrh, Golema reka	43.4076°N 22.5911°E	SMF	346117	PO43	KT211828						Korábek et al. 2016
HE001058	5	13	Helix	thessalica	Korábek O.	2015	shell	Serbia: Zaječar Distr.: Knjaževac env., Trgovište	43.5385°N 22.2866°E	SMF	346119	PO30	KT211824						Korábek et al. 2016
HE001059	4	10	Helix	cf. thessalica	Korábek O.	2015	shell	Serbia: Zaječar Distr.: Knjaževac env., Trgovište	43.5385°N 22.2866°E	SMF	346119	PO31	MW443243						this study	this sampling site yielded haplotypes corresponding to H. thessalica, H. vladika and H. pomatia; because tissues were not paired with shells, it was not possible to re-check after sequencing that the sample was taken from an individual unambiguously identifiable as H. thessalica
HE001060	5	13	Helix	thessalica	Korábek O.	2015	shell	Serbia: Zaječar Distr.: Rgotina	44.0267°N 22.2250°E	SMF	346120	PO40	KT211826						Korábek et al. 2016
HE001061	5	13	Helix	thessalica	Korábek O.	2015	shell	Serbia: Zlatibor Dist.: Bistrica near Nova Varoš	43.4672°N 19.6710°E	NMP	P6M 30155	TH5	MK482911						Korábek et al. 2020
HE001062	55	205	Caucasotachea	vindobonensis	Korábek O.	2015	shell	Serbia: Zlatibor Dist.: Bistrica near Nova Varoš	43.4672°N 19.6710°E	NMP	P6M 29990	CP21	MK482744	MK482921					Korábek et al. 2020
HE001063	5	13	Helix	thessalica	Korábek O.	2017	shell&genital	Serbia/Kosovo: Shar Mts., Prevalla (Prevalac) pass	42.18°N 20.98°E	NMP	P6M 30156	TH25	MK482909	MK483071					Korábek et al. 2020	geographic coordinates only indicative
HE001064	12	43	Helix	lutescens	Korábek O.	2014	shell	Slovakia: Bakta, forest margin by road to Bátka	48.3888°N 20.1087°E	NMP	P6M 30291	LT19	MW443555						this study
HE001065	55	203	Caucasotachea	vindobonensis	Korábek O.	2014	shell	Slovakia: Bakta, forest margin by road to Bátka	48.3888°N 20.1087°E	NMP	P6M 29991	CV21	MK482816	MK482990					Korábek et al. 2020
HE001066	11	38	Helix	pomatia	Korábek O.	2013	shell	Slovakia: Banská Bystrica region: Brezno, Podkoreňová	48.7993°N 19.6617°E	SMF	346072	SK001	KT211841						Korábek et al. 2016
HE001067	11	42	Helix	pomatia	Korábek O.	2013	shell	Slovakia: Banská Bystrica region: Brezno, Podkoreňová	48.7993°N 19.6617°E	SMF	346072	SK002	KT211842	KT211719					Korábek et al. 2016
HE001068	11	38	Helix	pomatia	Korábek O.	2013	shell	Slovakia: Banská Bystrica region: Brezno, Podkoreňová	48.7993°N 19.6617°E	SMF	346072	SK003	KT211843						Korábek et al. 2016
HE001069	11	36	Helix	pomatia	Korábek O.	2013	shell	Slovakia: Banská Bystrica region: Brezno, Podkoreňová	48.7993°N 19.6617°E	SMF	346072	SK004	KT211844						Korábek et al. 2016
HE001070	5	13	Helix	thessalica	Korábek O.	2015	shell	Slovakia: Banská Bystrica region: Chvatimech, normal-gauge railway to Podbrezová	48.8030°N 19.5587°E	SMF	346128	SK008	KT211845		MW465513				Korábek et al. 2016
HE001071	11	36	Helix	pomatia	Korábek O.	2014	shell	Slovakia: Banská Bystrica region: Jelšava	48.6225°N 20.2488°E	SMF	346075	P_221	KT211745						Korábek et al. 2016
HE001072	5	13	Helix	thessalica	Korábek O.	2015	shell&genital	Slovakia: Banská Bystrica region: Muráň env.	48.7489°N 20.0633°E	SMF	346129	P_244	KT211765	KT211706	MW465514				Korábek et al. 2016
HE001073	11	36	Helix	pomatia	Korábek O.	2014	shell	Slovakia: Banská Bystrica region: Mýtna env., road to Kriváň	48.5063°N 19.4965°E	SMF	346077	P_230	KT211752						Korábek et al. 2016
HE001074	11	38	Helix	pomatia	Korábek O.	2013	shell	Slovakia: Banská Bystrica region: Podbrezová, Piesok, Strojárenská	48.8062°N 19.5521°E	SMF	346078	SK009	KT211846						Korábek et al. 2016
HE001075	11	36	Helix	pomatia	Korábek O.	2013	shell	Slovakia: Banská Bystrica region: Podbrezová, Piesok, Strojárenská	48.8062°N 19.5521°E	SMF	346078	SK010	KT211847						Korábek et al. 2016
HE001076	11	36	Helix	pomatia	Korábek O.	2013	shell	Slovakia: Banská Bystrica region: Podbrezová, Piesok, Strojárenská	48.8062°N 19.5521°E	SMF	346078	SK011	KT211848						Korábek et al. 2016
HE001077	11	36	Helix	pomatia	Korábek O.	2013	shell	Slovakia: Banská Bystrica region: Podbrezová, Piesok, Strojárenská	48.8062°N 19.5521°E	SMF	346078	SK012	KT211849						Korábek et al. 2016
HE001078	5	13	Helix	pomatia	Korábek O.	2013	shell	Slovakia: Banská Bystrica region: Podbrezová, Piesok, Strojárenská	48.8062°N 19.5521°E	SMF	346078	SK013	KT211850						Korábek et al. 2016
HE001079	11	36	Helix	pomatia	Korábek O.	2013	shell	Slovakia: Banská Bystrica region: Podbrezová, Piesok, Strojárenská	48.8062°N 19.5521°E	SMF	346078	SK014	KT211851						Korábek et al. 2016
HE001080	11	36	Helix	pomatia	Korábek O.	2013	shell	Slovakia: Banská Bystrica region: Podbrezová, Piesok, Strojárenská	48.8062°N 19.5521°E	SMF	346078	SK015	KT211852						Korábek et al. 2016
HE001081	11	38	Helix	thessalica	Korábek O.	2015	shell	Slovakia: Banská Bystrica region: Podbrezová, Piesok, Strojárenská	48.8062°N 19.5521°E	SMF	346131	SK016	KT211853						Korábek et al. 2016
HE001082	11	36	Helix	pomatia	Korábek O.	2013	shell	Slovakia: Banská Bystrica region: Podbrezová, Štiavnička	48.8039°N 19.5558°E	no voucher		SK005	MF943350						Korábek et al. 2018a
HE001083	11	36	Helix	pomatia	Korábek O.	2013	shell	Slovakia: Banská Bystrica region: Podbrezová, Štiavnička	48.8039°N 19.5558°E	no voucher		SK006	MF943834						Korábek et al. 2018a
HE001084	11	36	Helix	pomatia	Korábek O.	2013	shell	Slovakia: Banská Bystrica region: railway station Banská Bystrica město	48.7314°N 19.1460°E	SMF	346079	SK017	KT211854	MF943962					Korábek et al. 2016, Korábek et al. 2018a
HE001085	11	38	Helix	pomatia	Korábek O.	2013	shell	Slovakia: Banská Bystrica region: railway station Banská Bystrica město	48.7314°N 19.1460°E	SMF	346079	SK018	KT211855						Korábek et al. 2016
HE001086	11	36	Helix	thessalica	Korábek O.	2015	shell	Slovakia: Banská Bystrica region: Tisovec, Šťavica	48.6862°N 19.9613°E	SMF	346133	P_243	KT211764						Korábek et al. 2016
HE001087	11	38	Helix	pomatia	Korábek O.	2014	shell	Slovakia: Banská Bystrica region: Veľký Blh	48.4505°N 20.1107°E	SMF	346084	P_251	KT211773						Korábek et al. 2016
HE001088	11	38	Helix	pomatia	Korábek O.	2014	shell	Slovakia: Banská Bystrica region: Zvolen, Zolná	48.6010°N 19.2246°E	SMF	346085	P_220	KT211744						Korábek et al. 2016
HE001089	5	13	Helix	thessalica	Korábek O.	2015	shell	Slovakia: Banská Bystrica: Chvatimech - Podbrezova, path along railway	48.8028°N 19.5572°E	SMF	346125	PO51	KT211830						Korábek et al. 2016
HE001090	11	36	Helix	pomatia	Korábek O.	2015	shell	Slovakia: between Bukovce and Chotča	49.2612°N 21.6940°E	NMP	P6M 29783	B10	MF943583	MF943997					Korábek et al. 2018a
HE001091	55	203	Caucasotachea	vindobonensis	Korábek O.	2015	shell	Slovakia: between Bukovce and Chotča	49.2612°N 21.6940°E	NMP	P6M 29992	CP17	MK482740	MK482917					Korábek et al. 2020
HE001092	11	38	Helix	pomatia	Korábek O.	2015	shell	Slovakia: between Výrava and Čabalovce	49.2077°N 21.9933°E	NMP	P6M 29785	P_591	MF943582						Korábek et al. 2018a
HE001093	11	36	Helix	pomatia	Korábek O.	2014	shell	Slovakia: Blatnica, road into Gaderská Dolina	48.9385°N 18.9389°E	NMP	P6M 29827	P_239	MF943517						Korábek et al. 2018a
HE001094	11	36	Helix	pomatia	Korábek O.	2014	shell	Slovakia: Blatnica, road into Gaderská Dolina	48.9385°N 18.9389°E	NMP	P6M 29827	P_356	MF943853						Korábek et al. 2018a
HE001095	24	89	Helix	lucorum	Korábek O.	2013	shell	Slovakia: Bratislava-Ružinov, Borodáčova	48.1535°N 17.1727°E	NMP	P6M 30048	LC93	MG709100						Korábek et al. 2018b
HE001096	11	36	Helix	pomatia	Korábek O.	2014	shell	Slovakia: Bratislava, Devín castle	48.1742°N 16.9776°E	NMP	P6M 29787	P_174	MF943440						Korábek et al. 2018a
HE001097	11	36	Helix	pomatia	Korábek O.	2014	shell	Slovakia: Bratislava, Devín castle	48.1742°N 16.9776°E	NMP	P6M 29787	P_365	MF943841						Korábek et al. 2018a
HE001098	11	36	Helix	pomatia	Korábek O.	2015	shell	Slovakia: Bratislava, Karlova Ves	48.1667°N 17.0562°E	NMP	P6M 29789	P_613	MF943591						Korábek et al. 2018a
HE001099	11	36	Helix	pomatia	Korábek O.	2014	shell	Slovakia: Bratislava, Komisárky	48.2170°N 17.1700°E	NMP	P6M 29790	P_420	MF943498						Korábek et al. 2018a
HE001100	11	36	Helix	pomatia	Korábek O.	2015	shell	Slovakia: Dobrohošť	47.985°N 17.359°E	NMP	P6M 29792	P_631	MF943561						Korábek et al. 2018a
HE001101	11	36	Helix	pomatia	Korábek O.	2014	shell	Slovakia: Gabčíkovo, park, Čierny les and village	47.89°N 17.59°E	NMP	P6M 29793	P_422	MF943522						Korábek et al. 2018a	geographic coordinates only indicative
HE001102	5	15	Helix	thessalica	Korábek O.	2016	shell&genital	Slovakia: Hajnáčka, castle	48.2180°N 19.9557°E	NMP	P6M 30157	TH11	MK482896						Korábek et al. 2020
HE001103	11	36	Helix	pomatia	Korábek O.	2014	shell	Slovakia: Handlová, by railway station	48.7275°N 18.7548°E	SMF	346074	P_226	KT211749						Korábek et al. 2016
HE001104	11	36	Helix	pomatia	Korábek O.	2016	shell	Slovakia: Horná Mičiná	48.7022°N 19.2144°E	NMP	P6M 29781	P_904	MF943697						Korábek et al. 2018a
HE001105	11	38	Helix	pomatia	Korábek O.	2015	shell	Slovakia: Hrabkov	48.959°N 21.021°E	NMP	P6M 29795	P_743	MF943646						Korábek et al. 2018a
HE001106	11	36	Helix	pomatia	Korábek O.	2015	shell	Slovakia: Hubová near Ružomberok	49.1169°N 19.1920°E	NMP	P6M 29796	P_742	MF943548						Korábek et al. 2018a
HE001107	11	36	Helix	pomatia	Korábek O.	2015	shell	Slovakia: Hutka	49.3949°N 21.4344°E	NMP	P6M 29797	P_595	MF943584						Korábek et al. 2018a
HE001108	12	43	Helix	lutescens	Korábek O.	2015	shell	Slovakia: Jaklovce	48.8735°N 20.9913°E	NMP	P6M 30289	LT22	MW443556						this study
HE001109	11	42	Helix	pomatia	Korábek O.	2015	shell	Slovakia: Javorec	48.7596°N 17.4063°E	NMP	P6M 29798	P_737	MF943650						Korábek et al. 2018a
HE001110	11	38	Helix	pomatia	Korábek O.	2013	shell	Slovakia: Kolonica, N slope of Vihorlat E of Snina	48.96°N 22.26°E	SMF	346076	PO83	KT211837			KT211688			Korábek et al. 2016
HE001111	12	43	Helix	lutescens	Korábek O.	2014	shell	Slovakia: Košice Region: Belža	48.58°N 21.27°E	NMP	P6M 30333	LT21	MW443557						this study	geographic coordinates only indicative
HE001112	12	43	Helix	lutescens	Korábek O.	2014	shell	Slovakia: Košice Region: Haniska-Grajciar	48.59°N 21.26°E	NMP	P6M 30303	LT17	MW443558						this study	geographic coordinates only indicative
HE001113	12	43	Helix	lutescens	Korábek O.	2014	shell	Slovakia: Košice Region: Kechnec	48.55°N 21.26°E	NMBE, NMP	523961/2, P6M 30296	LT7	KP072331	MW443936		MW446079			Korábek et al. 2015	geographic coordinates only indicative
HE001114	12	43	Helix	lutescens	Korábek O.	2013	shell	Slovakia: Košice region: Plešivec, near road to Rožňava	48.5481°N 20.4103°E	SMF, NMP	342477, P6M 30312	LT2	MW443244						this study
HE001115	11	38	Helix	pomatia	Korábek O.	2013	shell	Slovakia: Košice region: Zadiel	48.6161°N 20.8325°E	SMF	342493	PO9	KP072380	KP072083	MW465512	KT211689			Korábek et al. 2015, Korábek et al. 2016
HE001116	11	38	Helix	pomatia	Korábek O.	2014	shell	Slovakia: Košice, Šebastovce	48.65°N 21.27°E	NMP	P6M 29799	P_175	MF943403						Korábek et al. 2018a	geographic coordinates only indicative
HE001117	11	36	Helix	pomatia	Korábek O.	2015	shell	Slovakia: Krupina	48.3672°N 19.0645°E	NMP	P6M 29800	P_736	MF943649						Korábek et al. 2018a
HE001118	11	36	Helix	pomatia	Korábek O.	2014	shell	Slovakia: Martovce, Alúvium Žitavy	47.8601°N 18.1408°E	NMP	P6M 29802	P_413	MF943523	MF943983					Korábek et al. 2018a
HE001119	11	36	Helix	pomatia	Korábek O.	2015	shell	Slovakia: Moravany nad Váhom, Veľký jarok	48.5995°N 17.8647°E	NMP	P6M 29803	P_724	MF943671						Korábek et al. 2018a
HE001120	55	203	Caucasotachea	vindobonensis	Korábek O.	2015	shell	Slovakia: Moravany nad Váhom, Veľký jarok	48.5995°N 17.8647°E	NMP	P6M 29993	CP51	MK482773	MK482950					Korábek et al. 2020
HE001121	11	42	Helix	pomatia	Korábek O.	2015	shell	Slovakia: Naháč, Krupský potok	48.5365°N 17.5082°E	NMP	P6M 29805	P_733	MF943648						Korábek et al. 2018a
HE001122	55	205	Caucasotachea	vindobonensis	Korábek O.	2014	shell	Slovakia: Nitra Region: Mužla, Čenkov, NPR Čenkovská step	47.7689°N 18.5200°E	no voucher		CV31	MK482825	MK482999					Korábek et al. 2020
HE001123	24	89	Helix	lucorum	Korábek O.	2016	shell	Slovakia: Nitra, railway station	48.301°N 18.079°E	NMP	P6M 30049	LC68	MG709101						Korábek et al. 2018b	geographic coordinates only indicative
HE001124	11	36	Helix	pomatia	Korábek O.	2014	shell	Slovakia: Orechová Potôň, near Slovakiaring	48.0541°N 17.5972°E	NMP	P6M 29806	P_418	MF943383						Korábek et al. 2018a
HE001125	55	205	Caucasotachea	vindobonensis	Korábek O.	2015	shell	Slovakia: Pataš, Bahno	47.8740°N 17.6709°E	NMP	P6M 29994	CP32	MK482756	MK482933					Korábek et al. 2020
HE001126	11	36	Helix	pomatia	Korábek O.	2014	shell	Slovakia: Pernek	48.3617°N 17.1628°E	NMP	P6M 29808	P_415	MF943499						Korábek et al. 2018a
HE001127	11	36	Helix	pomatia	Korábek O.	2013	shell	Slovakia: Pliešovce, mokřad za vesnicí	48.4256°N 19.1674°E	no voucher		PO49	KT211829	MF943944					Korábek et al. 2016, Korábek et al. 2018a
HE001128	11	36	Helix	pomatia	Korábek O.	2014	shell	Slovakia: Podrycerová	49.3914°N 19.0706°E	NMP	P6M 29809	P_241	MF943513						Korábek et al. 2018a
HE001129	55	205	Caucasotachea	vindobonensis	Korábek O.	2014	shell	Slovakia: Radvaň nad Dunajom	47.7475°N 18.3750°E	NMP	P6M 29995	CV29	MK482822	MK482996					Korábek et al. 2020
HE001130	11	38	Helix	pomatia	Korábek O.	2014	shell	Slovakia: road between Runina and Topoľa	49.0633°N 22.3608°E	SMF	346080	P_229	KT211751						Korábek et al. 2016
HE001131	11	36	Helix	pomatia	Korábek O.	2015	shell	Slovakia: Šahy, Slovenského národného povstania	48.0776°N 18.9458°E	NMP	P6M 29812	P_740	MF943668	MF944010					Korábek et al. 2018a
HE001132	11	36	Helix	pomatia	Korábek O.	2015	shell	Slovakia: Santovka, on road to Hontianska Vrbica	48.1508°N 18.7436°E	NMP	P6M 29813	P_741	MF943669						Korábek et al. 2018a
HE001133	11	36	Helix	pomatia	Korábek O.	2014	shell	Slovakia: Sekule, gas station on D2	48.6137°N 17.0143°E	SMF	346081	P_295	KT211786						Korábek et al. 2016
HE001134	11	38	Helix	pomatia	Korábek O.	2013	shell	Slovakia: Senec, camp by Slnečné jazerá	48.2141°N 17.4100°E	NMP	P6M 29786	P_26	MF943359						Korábek et al. 2018a
HE001135	11	36	Helix	pomatia	Korábek O.	2016	shell	Slovakia: Šiatorská Bukovinka, road to Somoskőújfalu	48.1719°N 19.8209°E	NMP	P6M 29814	P_869	MF943726	MF944015					Korábek et al. 2018a
HE001136	12	43	Helix	lutescens	Korábek O.	2013	shell	Slovakia: Spišské Podhradie env., Spiš castle	49.0002°N 20.7685°E	SMF	342523	LT31	KP072327						Korábek et al. 2015
HE001137	11	36	Helix	pomatia	Korábek O.	2014	shell	Slovakia: Spišské Podhradie: Spiš castle, parking lot	48.9987°N 20.7700°E	SMF	346082	P_283	KT211784						Korábek et al. 2016
HE001138	11	36	Helix	pomatia	Korábek O.	2015	shell	Slovakia: Štitáre, forest above the village	48.3504°N 18.1513°E	NMP	P6M 29815	P_710	MF943670						Korábek et al. 2018a
HE001139	11	36	Helix	pomatia	Korábek O.	2016	shell	Slovakia: Stupava, Marcheggská street	48.2743°N 17.0280°E	NMP	P6M 29816	P_872	MF943725	MF944014					Korábek et al. 2018a
HE001140	11	36	Helix	pomatia	Korábek O.	2014	shell	Slovakia: Svinná	48.7855°N 18.1625°E	NMP	P6M 29819	P_416	MF943515						Korábek et al. 2018a
HE001141	11	36	Helix	pomatia	Korábek O.	2013	shell	Slovakia: Tomašovce, gas station	48.3917°N 19.6273°E	SMF	346083	PO8	KT211833	KT211710					Korábek et al. 2016
HE001142	11	36	Helix	pomatia	Korábek O.	2015	shell	Slovakia: Topolčany, near Nitra river	48.5550°N 18.1827°E	NMP	P6M 29818	P_734	MF943647						Korábek et al. 2018a
HE001143	12	43	Helix	lutescens	Korábek O.	2014	shell	Slovakia: Tornaľa	48.4068°N 20.3148°E	NMP	P6M 30386	LT18	MW443559						this study
HE001144	12	43	Helix	lutescens	Korábek O.	2013	shell	Slovakia: Turňa nad Bodvou, below the castle	48.6094°N 20.8799°E	SMF	342522	LT4	KP072328	KP072095					Korábek et al. 2015
HE001145	11	36	Helix	pomatia	Korábek O.	2015	shell	Slovakia: Ubľa, road to Ladomirov	48.9166°N 22.3638°E	NMP	P6M 29822	P_599	MF943581						Korábek et al. 2018a
HE001146	11	36	Helix	pomatia	Korábek O.	2014	shell	Slovakia: Uhrovec	48.7390°N 18.3352°E	NMP	P6M 29820	P_419	MF943516						Korábek et al. 2018a
HE001147	11	36	Helix	pomatia	Korábek O.	2013	shell	Slovakia: Valča env., Starianská dolina	49.0014°N 18.7989°E	NMP	P6M 29828	SK007	MF943351						Korábek et al. 2018a
HE001148	11	36	Helix	pomatia	Korábek O.	2015	shell	Slovakia: Višňové, on road to Čachtice	48.7347°N 17.7605°E	NMP	P6M 29823	P_711	MF943672						Korábek et al. 2018a
HE001149	11	36	Helix	pomatia	Korábek O.	2016	shell	Slovakia: Vršatské Podhradie, Chmeľová	49.07°N 18.16°E	NMP	P6M 29824	P_493	MF943832	MF944063					Korábek et al. 2018a
HE001150	11	36	Helix	pomatia	Korábek O.	2014	shell	Slovakia: Vysoké Tatry, Stará Lesná	49.1514°N 20.2872°E	no voucher		P_159	KT211735						Korábek et al. 2016
HE001151	11	36	Helix	pomatia	Korábek O.	2015	shell	Slovakia: Žemberovce env., road to Levice	48.2600°N 18.7218°E	NMP	P6M 29826	P_331	MF943645						Korábek et al. 2018a
HE001152	11	36	Helix	pomatia	Korábek O.	2014	shell	Slovakia: Žilina region: Bytča	49.2408°N 18.5522°E	SMF	346073	P_311	KT211793	MF943980					Korábek et al. 2016, Korábek et al. 2018a
HE001153	11	36	Helix	pomatia	Korábek O.	2015	shell	Slovena: Postojna, Postojnska jama	45.7814°N 14.2008°E	NMP	P6M 29829	P_434	MF943554						Korábek et al. 2018a
HE001154	11	36	Helix	pomatia	Korábek O.	2014	shell	Slovenia: Bled lake, Blejski otok	46.3629°N 14.0902°E	NMP	P6M 29830	P_304	MF943395	MF943973					Korábek et al. 2018a
HE001155	11	36	Helix	pomatia	Korábek O.	2015	shell	Slovenia: env. of Doga Vas near Kočevlje	45.6188°N 14.8712°E	NMP	P6M 29831	P_437	MF943557						Korábek et al. 2018a
HE001156	11	36	Helix	pomatia	Korábek O.	2015	shell	Slovenia: Ig	45.9547°N 14.5305°E	NMP	P6M 29832	P_430	MF943550	MF943992					Korábek et al. 2018a
HE001157	11	36	Helix	pomatia	Korábek O.	2013	shell	Slovenia: Kamnik	46.2234°N 14.6149°E	NMP	P6M 29833	PO59	MF943336	MF943954					Korábek et al. 2018a
HE001158	11	36	Helix	pomatia	Korábek O.	2013	shell	Slovenia: Kozjak/Završe	46.4127°N 15.1748°E	NMP	P6M 29836	P_21	MF943345						Korábek et al. 2018a
HE001159	11	38	Helix	pomatia	Korábek O.	2013	shell	Slovenia: Ljubljana	46.05°N 14.50°E	SMF	346139	PO5	KF823054	KF823090					Korábek et al. 2014	geographic coordinates only indicative
HE001160	11	38	Helix	pomatia	Korábek O.	2014	shell	Slovenia: Ljubljana, Krakovska ulica	46.0448°N 14.5025°E	NMP	P6M 29837	P_313	MF943397						Korábek et al. 2018a
HE001161	11	36	Helix	pomatia	Korábek O.	2014	shell	Slovenia: Luče, autocamp Šmica	46.3617°N 14.7360°E	NMP	P6M 29838	P_257	MF943398						Korábek et al. 2018a
HE001162	11	41	Helix	pomatia	Korábek O.	2013	shell	Slovenia: Nanos Mt., Podgrič	45.8001°N 13.9963°E	NMP	P6M 29839	P_08	MF943347						Korábek et al. 2018a
HE001163	11	38	Helix	pomatia	Korábek O.	2015	shell	Slovenia: Nemški Rovt	46.2742°N 13.9907°E	no voucher		P_433	MF943553						Korábek et al. 2018a
HE001164	11	36	Helix	pomatia	Korábek O.	2015	shell	Slovenia: northern slope of Ratitovec, on road from Rudno	46.2720°N 14.1070°E	NMP	P6M 29840	P_435	MF943555						Korábek et al. 2018a
HE001165	11	36	Helix	pomatia	Korábek O.	2015	shell	Slovenia: Rove	46.1580°N 14.9930°E	NMP	P6M 29841	P_609	MF943611						Korábek et al. 2018a
HE001166	11	36	Helix	pomatia	Korábek O.	2015	shell	Slovenia: Rovt pod Menino	46.2679°N 14.8856°E	NMP	P6M 29842	P_607	MF943610						Korábek et al. 2018a
HE001167	11	36	Helix	pomatia	Korábek O.	2015	shell	Slovenia: Spodnje Pirniče	46.1330°N 14.4470°E	NMP	P6M 29843	P_432	MF943552						Korábek et al. 2018a
HE001168	11	36	Helix	pomatia	Korábek O.	2014	shell	Slovenia: Trate	46.7036°N 15.7839°E	NMP	P6M 29844	P_138	MF943386						Korábek et al. 2018a
HE001169	11	36	Helix	pomatia	Korábek O.	2014	shell	Slovenia: Trate	46.7036°N 15.7839°E	NMP	P6M 29844	P_182	MF943837						Korábek et al. 2018a
HE001170	11	36	Helix	pomatia	Korábek O.	2014	shell	Slovenia: Trenta	46.3823°N 13.7522°E	NMP	P6M 29846	P_293	MF943394						Korábek et al. 2018a
HE001171	11	36	Helix	pomatia	Korábek O.	2013	shell	Slovenia: Turjak	45.8694°N 14.6192°E	no voucher		PO48	MF943323						Korábek et al. 2018a
HE001172	11	36	Helix	pomatia	Korábek O.	2015	shell	Slovenia: Turjak	45.8798°N 14.6165°E	no voucher		P_436	MF943556	MF943993					Korábek et al. 2018a
HE001173	11	38	Helix	pomatia	Korábek O.	2014	shell	Slovenia: Velika Planina, Kamniška Bistrica	46.3057°N 14.6083°E	NMP	P6M 29847	P_290	MF943399						Korábek et al. 2018a
HE001174	11	38	Helix	pomatia	Korábek O.	2014	shell	Slovenia: Vintgar gorge	46.3967°N 14.0887°E	NMP	P6M 29848	P_286	MF943396						Korábek et al. 2018a
HE001175	24	89	Helix	lucorum	Korábek O.	2013	shell	Spain: Navarra: Cáseda; population established ca. 1990 from some 12 individuals from Vicenza region, Italy	42.528°N -1.368°E	no voucher		LC51	MG709102	MG709125					Korábek et al. 2018b
HE001176	11	36	Helix	pomatia	Korábek O.	2013	shell	Sweden: Dalby near Lund, Dalby Söderskog National Park	55.6765°N 13.3296°E	no voucher		P_06	MF943355						Korábek et al. 2018a
HE001177	11	36	Helix	pomatia	Korábek O.	2016	shell	Sweden: Gävleborg county: Granövägen, Färnebofjärden National Park entrance	60.2713°N 16.9076°E	NMP	P6M 29849	P_866	MF943828						Korábek et al. 2018a
HE001178	11	36	Helix	pomatia	Korábek O.	2016	shell	Sweden: Skåne county: Bromölla, gas station	56.0634°N 14.4960°E	NMP	P6M 29850	P_870	MF943829						Korábek et al. 2018a
HE001179	11	36	Helix	pomatia	Korábek O.	2013	shell	Sweden: Stockholm: Edsberg env., N of Rösjön lake	59.4517°N 17.9894°E	SMF	342492	PO46	KP072378	KP072085					Korábek et al. 2015
HE001180	11	36	Helix	pomatia	Korábek O.	2014	shell	Sweden: Uppland, Vallentuna, Bällsta	59.5166°N 18.0649°E	SMF	346086	P_185	KT211737						Korábek et al. 2016
HE001181	11	36	Helix	pomatia	Korábek O.	2014	shell	Switzerland: Ackersand	46.2366°N 7.8744°E	no voucher		P_262	MF943541	MF943991					Korábek et al. 2018a
HE001182	11	36	Helix	pomatia	Korábek O.	2014	shell	Switzerland: Basel	47.5458°N 7.6462°E	NMP	P6M 29851	P_291	MF943530						Korábek et al. 2018a
HE001183	11	36	Helix	pomatia	Korábek O.	2014	shell	Switzerland: Engelberg	46.8284°N 8.4131°E	NMP	P6M 29852	P_281	MF943531						Korábek et al. 2018a
HE001184	11	36	Helix	pomatia	Korábek O.	2014	shell	Switzerland: Faoug	46.9022°N 7.0699°E	NMP	P6M 29853	P_315	MF943533						Korábek et al. 2018a
HE001185	11	36	Helix	pomatia	Korábek O.	2014	shell	Switzerland: Gondo	46.1950°N 8.1389°E	NMP	P6M 29854	P_322	MF943537	MF943989					Korábek et al. 2018a
HE001186	11	36	Helix	pomatia	Korábek O.	2014	shell	Switzerland: Langenthal	47.2179°N 7.7597°E	NMP	P6M 29855	P_277	MF943532						Korábek et al. 2018a
HE001187	11	36	Helix	pomatia	Korábek O.	2014	shell	Switzerland: Mauracker	46.2792°N 7.8132°E	no voucher		P_300	MF943540						Korábek et al. 2018a
HE001188	11	36	Helix	pomatia	Korábek O.	2014	shell	Switzerland: Miéville	46.1459°N 7.0295°E	NMP	P6M 29857	P_410	MF943535	MF943987					Korábek et al. 2018a
HE001189	11	36	Helix	pomatia	Korábek O.	2014	shell	Switzerland: Roche	46.3529°N 6.9328°E	NMP	P6M 29858	P_273	MF943534	MF943986					Korábek et al. 2018a
HE001190	11	36	Helix	pomatia	Korábek O.	2014	shell	Switzerland: Sion	46.2341°N 7.3651°E	NMP	P6M 29859	P_305	MF943536	MF943988					Korábek et al. 2018a
HE001191	11	36	Helix	pomatia	Korábek O.	2016	shell	Switzerland: Tamins	46.8300°N 9.4100°E	NMP	P6M 29860	P_465	MF943763						Korábek et al. 2018a
HE001192	11	36	Helix	pomatia	Korábek O.	2016	shell	Switzerland: Tamins	46.8300°N 9.4100°E	NMP	P6M 29860	P_475	MF943892	MF944072					Korábek et al. 2018a
HE001193	11	36	Helix	pomatia	Korábek O.	2016	shell	Switzerland: Trübbach	47.0731°N 9.4883°E	NMP	P6M 29861	P_467	MF943762	MF944028					Korábek et al. 2018a
HE001194	16	59	Helix	pronuba	Korábek O.	2013	shell	Tunisia: Djerba, „Sidi Mahir“?	33.8°N 10.9°E	SMF	214790/4	ME2	KP072340						Korábek et al. 2015	geographic coordinates only indicative
HE001195	17	63	Helix	melanostoma	Korábek O.	2013	shell	Tunisia: Hammamet, (unreadable)	36.4°N 10.6°E	SMF	280600/5	ME5	KP072342						Korábek et al. 2015	geographic coordinates only indicative
HE001196	17	63	Helix	melanostoma	Korábek O.	2014	shell	Tunisia: Jendouba province: 2 km N of Jendouba (road no. P17)	36.5384°N 8.7411°E	SMF	346021	ME14	KT211723	KT211699	MW465503	KT211678	MW465470		Korábek et al. 2016
HE001197	17	63	Helix	melanostoma	Korábek O.	2013	shell	Tunisia: km 16 from Enfidaville to Al-Qayrawan (Kairuan)	35.81°N 10.15°E	SMF	172524/8	ME7	KP072344						Korábek et al. 2015	geographic coordinates only indicative
HE001198	17	63	Helix	melanostoma	Korábek O.	2013	shell	Tunisia: km 54.5 S of Tunis to Soussa	36.4°N 10.5°E	SMF	172514/3	ME9	KP072345						Korábek et al. 2015	geographic coordinates only indicative
HE001199	17	63	Helix	melanostoma	Korábek O.	2014	shell	Tunisia: Le Kef province: 5 Km W of Es Sers (El Sers, As Sars), near the junction of the roads P12 and 18	36.0922°N 8.9661°E	NMBE	565445	ME13	MT949747	MT947420					Korábek et al. 2021
HE001200	17	63	Helix	melanostoma	Korábek O.	2013	shell	Tunisia: ruins of Sbeitla (Sufetula) near Kasserine	35.23°N 9.12°E	SMF	311885/4	ME1	KP072338	KP072107					Korábek et al. 2015	geographic coordinates only indicative
HE001201	17	63	Helix	melanostoma	Korábek O.	2013	shell	Tunisia: Teboursouk env., Thugga (Dougga) ruins	36.42°N 9.21°E	SMF	338066/14	ME6	KP072343						Korábek et al. 2015	geographic coordinates only indicative
HE001202	42	154	Levantina	naegelei	Korábek O.	2014	shell	Turkey: Adana prov., Hacımusalı env.	37.3503°N 35.2608°E	SMF	342529	LV3	KP072334	KP072183					Korábek et al. 2015
HE001203	42	154	Levantina	naegelei	Korábek O.	2014	shell	Turkey: Adana prov., Hacımusalı env.	37.3503°N 35.2608°E	SMF	342529	LV15	OL891819	OL862425					Korábek et al. in review
HE001204	28	101	Helix	asemnis	Korábek O.	2013	shell	Turkey: Adana Prov.: Bebeli env., bridge across Ceyhan river	36.6474°N 35.4977°E	SMF	342421	AS3	KP072226	KP072145					Korábek et al. 2015
HE001205	28	101	Helix	asemnis	Korábek O.	2013	shell	Turkey: Adana Prov.: Bebeli env., bridge across Ceyhan river	36.6474°N 35.4977°E	SMF	342421	AS34	KP072228						Korábek et al. 2015
HE001206	37	134	Helix	kazouiniana	Korábek O.	2013	shell	Turkey: Adana Prov.: Bebeli env., bridge across Ceyhan river	36.6474°N 35.4977°E	SMF	342460	MS1	KP072346	KP072179					Korábek et al. 2015
HE001207	37	134	Helix	kazouiniana	Korábek O.	2013	shell	Turkey: Adana Prov.: Bebeli env., bridge across Ceyhan river	36.6474°N 35.4977°E	SMF	342460	MS2	KP072349	KP072178					Korábek et al. 2015
HE001208	28	102	Helix	asemnis	Korábek O.	2013	shell	Turkey: Adana Prov.: Dumlu, Dumlu Kalesi	37.1528°N 35.7022°E	SMF	342422	AS12	KP072211	KP072135					Korábek et al. 2015
HE001209	28	102	Helix	asemnis	Korábek O.	2013	shell	Turkey: Adana Prov.: Dumlu, Dumlu Kalesi	37.1528°N 35.7022°E	SMF	342422	AS44	KP072235						Korábek et al. 2015
HE001210	14	53	Helix	fathallae	Korábek O.	2013	shell	Turkey: Adana Prov.: Dumlu, Dumlu Kalesi	37.15°N 35.70°E	NMBE	505541	FA1	KP072292	KP072110					Korábek et al. 2015
HE001211	42	158	Levantina	naegelei	Korábek O.	2013	shell	Turkey: Adana Prov.: Feke env., limestone rock by the road to Yeşilvadi	37.8422°N 35.9503°E	SMF	342532	LV6	KP072335	MW443937		MW446080			Korábek et al. 2015
HE001212	42	158	Levantina	naegelei	Korábek O.	2013	shell	Turkey: Adana Prov.: Feke env., limestone rock by the road to Yeşilvadi	37.8422°N 35.9503°E	SMF	342532	LV13	OL891820			MW446081			Korábek et al. in review
HE001213	28	105	Helix	asemnis	Korábek O.	2013	shell	Turkey: Adana Prov.: Karaisalı env., Karakiliç Köyilı	37.3117°N 34.9889°E	SMF	342423	AS24	KP072222	KP072140					Korábek et al. 2015
HE001214	28	105	Helix	asemnis	Korábek O.	2013	shell	Turkey: Adana Prov.: Karaisalı env., Karakiliç Köyilı	37.3117°N 34.9889°E	SMF	342423	AS45	KP072236						Korábek et al. 2015
HE001215	42	155	Levantina	cilicica	Korábek O.	2013	shell&origin	Turkey: Adana Prov.: Karaisalı env., Karakiliç Köyilı	37.3117°N 34.9889°E	SMF	360494	LV2	OL891821	OL862426					this study
HE001216	42	155	Levantina	cilicica	Korábek O.	2013	shell&origin	Turkey: Adana Prov.: Karaisalı env., Karakiliç Köyilı	37.3117°N 34.9889°E	SMF	360494	LV16	OL891822	OL862427					Korábek et al. in review
HE001217	28	102	Helix	asemnis	Korábek O.	2013	shell	Turkey: Adana Prov.: Kelerbaşi env., walley under Aladağ Geçidi, road to Imamoğlu	37.4947°N 35.3981°E	SMF	342424	AS5	KP072240	KP072136					Korábek et al. 2015
HE001218	28	103	Helix	asemnis	Korábek O.	2013	shell	Turkey: Adana Prov.: Kelerbaşi env., walley under Aladağ Geçidi, road to Imamoğlu	37.4947°N 35.3981°E	SMF	342424	AS8	KP072247	KP072137					Korábek et al. 2015
HE001219	42	157	Levantina	naegelei	Korábek O.	2016	shell	Turkey: Adana Prov.: Kelerbaşi env., walley under Aladağ Geçidi, road to Imamoğlu	37.4947°N 35.3981°E	SMF	342531	LV8	KP072337						Korábek et al. 2015
HE001220	42	157	Levantina	naegelei	Korábek O.	2016	shell	Turkey: Adana Prov.: Kelerbaşi env., walley under Aladağ Geçidi, road to Imamoğlu	37.4947°N 35.3981°E	SMF	342531	LV12	OL891823	OL862428					Korábek et al. in review
HE001221	28	105	Helix	asemnis	Korábek O.	2013	shell	Turkey: Adana Prov.: Kıralan env., Çakıt Suyu	37.2789°N 34.9981°E	SMF	342425	AS17	KP072214	KP072139					Korábek et al. 2015
HE001222	29	109	Helix	asemnis	Korábek O.	2013	shell	Turkey: Adana Prov.: Kıralan env., Çakıt Suyu	37.2789°N 34.9981°E	SMF	342425	AS48	KP072239	KP072158					Korábek et al. 2015
HE001223	42	156	Levantina	cilicica	Korábek O.	2013	shell	Turkey: Adana Prov.: Kıralan env., Çakıt Suyu	37.2789°N 34.9981°E	SMF	342526	IS1	KP072308	KP072184		MW446082			Korábek et al. 2015
HE001224	42	156	Levantina	cilicica	Korábek O.	2013	shell	Turkey: Adana Prov.: Kıralan env., Çakıt Suyu	37.2789°N 34.9981°E	SMF	342526	LV17	OL891824	OL862429		MW446083			Korábek et al. in review
HE001225	28	106	Helix	asemnis	Korábek O.	2013	shell	Turkey: Adana Prov.: Kozan	37.4356°N 35.8067°E	SMF	342426	AS10	KP072209	KP072141					Korábek et al. 2015
HE001226	28	106	Helix	asemnis	Korábek O.	2013	shell	Turkey: Adana Prov.: Kozan	37.4356°N 35.8067°E	SMF	342426	AS43	KP072234						Korábek et al. 2015
HE001227	28	104	Helix	asemnis	Korábek O.	2013	shell	Turkey: Adana Prov.: Salbaş env., Gökkuyu	37.0914°N 35.1103°E	SMF	342427	AS16	KP072213	KP072144					Korábek et al. 2015
HE001228	28	102	Helix	asemnis	Korábek O.	2013	shell	Turkey: Adana Prov.: Yilankale, rocks opposite to the castle	37.0164°N 35.7447°E	SMF	342428	AS22	KP072220	KP072134					Korábek et al. 2015
HE001229	37	135	Helix	kazouiniana	Korábek O.	2013	shell	Turkey: Adana Prov.: Zeytinbeli env.	36.8337°N 35.7612°E	SMF	342461	MS4	KP072350						Korábek et al. 2015
HE001230	39	137	Maltzanella	dickhauti	Korábek O.	2013	shell	Turkey: Afyonkarahisar Prov.: Burunkaya near Dinar	38.093°N 30.254°E	SMNS	ZI0100714	MT7	KP072353	KP072194		MW446084			Korábek et al. 2015	geographic coordinates only indicative
HE001231	24	95	Helix	lucorum	Korábek O.	2013	shell	Turkey: Afyonkarahisar Prov.: Çay	38.5925°N 31.0289°E	SMF	342468	LC6	KP072323						Korábek et al. 2015
HE001232	24	95	Helix	lucorum	Korábek O.	2013	shell	Turkey: Afyonkarahisar Prov.: Çay	38.5925°N 31.0289°E	SMF	342468	LC19	KP072314	KP072132					Korábek et al. 2015
HE001233	26	99	Helix	pathetica	Korábek O.	2013	shell	Turkey: Amasya Prov.: Amasya, tombs of the kings of Pontus	40.65°N 35.83°E	NMBE	505492	PA2	KP072368						Korábek et al. 2015
HE001234	29	110	Helix	asemnis	Korábek O.	2013	shell	Turkey: Antalya Prov.: 2km N of Beldibi	36.7349°N 30.5596°E	NMBE	505539	AS35	KP072229						Korábek et al. 2015
HE001235	29	110	Helix	asemnis	Korábek O.	2013	shell	Turkey: Antalya Prov.: Alanya, castle	36.5330°N 31.9904°E	SMF	coll. Schütt 477	AS32	KP072227						Korábek et al. 2015
HE001236	39	137	Maltzanella	dickhauti	Korábek O.	2013	shell	Turkey: Antalya Prov.: Bakacak Beli between Saklıkent and Çakırlar	36.89°N 30.43°E	SMNS	ZI0100715	MT9	KP072355	KP072193		MW446085	MW465471		Korábek et al. 2015	geographic coordinates only indicative	MW465455
HE001237	40	139	Maltzanella	dickhauti	Korábek O.	2013	shell	Turkey: Antalya Prov.: Dağbeli (Hafizbey) env.	37.193°N 30.504°E	SMF	175525/4	ES4xxMT8	MW443560						this study	geographic coordinates only indicative
HE001238	32	125	Helix	nucula	Korábek O.	2013	shell	Turkey: Antalya Prov.: Finike	36.30°N 30.13°E	NMBE	505543	NU41	KP072363						Korábek et al. 2015
HE001239	20	70	Helix	borealis	Korábek O.	2013	shell&mtDNA	Turkey: Antalya Prov.: rock tombs between Finike and Sahilkent	36.344°N 30.191°E	NMBE	505540	BR1	KP072260	MT947421		MW446086			Korábek et al. 2015
HE001240	20	70	Helix	borealis	Korábek O.	2013	shell&mtDNA	Turkey: Antalya Prov.: rock tombs between Finike and Sahilkent	36.344°N 30.191°E	NMBE	505540	BR1B	MT949748						Korábek et al. 2021
HE001241	20	71	Helix	borealis	Korábek O.	2013	shell&mtDNA	Turkey: Antalya Prov.: rock tombs between Finike and Sahilkent	36.344°N 30.191°E	NMBE	505540	BR1C	MT949749	MT947422		MW446087			Korábek et al. 2021
HE001242	20	70	Helix	borealis	Korábek O.	2016	shell	Turkey: Antalya Prov.: ruins of Limyra 7 km NE Finike	36.343°N 30.171°E	coll. Menkhorst H.		BR18	MT949750						Korábek et al. 2021
HE001243	32	122	Helix	nucula	Korábek O.	2013	shell	Turkey: Antalya Prov.: ruins of Perge	36.96°N 30.85°E	SMF	coll. Schütt 470	NU10	KP072360						Korábek et al. 2015	geographic coordinates only indicative
HE001244	32	122	Helix	nucula	Korábek O.	2014	shell	Turkey: Antalya Prov.: ruins of Perge	36.9612°N 30.8546°E	SMF	360436	NU21	MW443561	MW443938	MW465506	MW446088			this study
HE001245	29	110	Helix	asemnis	Korábek O.	2013	shell	Turkey: Antalya Prov.: Turunçova env., near Limyra	36.5167°N 30.0497°E	SMF	342429	AS20	KP072218						Korábek et al. 2015
HE001246	53	199	Isaurica	schuetti	Korábek O.	2013	shell	Turkey: Antalya Prov.: Turunçova env., near Limyra	36.5167°N 30.0497°E	SMF	342498	IS41	KP072309	MZ382614		MW446089			Korábek et al. 2015, Neiber et al. 2021		MW465456
HE001247	48	171	Lindholmia	christophi	Neiber M. T.		shell	Turkey: Artvin Prov.: Ardanuç, Ardanuç Canyon	41.1308°N 42.0481°E	coll. Neiber M. T.		404	KP072200	KP072190	MW465524	MW446090	MW465472		Korábek et al. 2015		MW465457
HE001248	24	95	Helix	lucorum	Korábek O.	2013	mtDNA	Turkey: Artvin Prov.: Çiftlikdüzü env., above Dört Kilise near Yusufeli	40.8375°N 41.4578°E	no voucher		NO7	KP072358	KP072131					Korábek et al. 2015
HE001249	24	95	Helix	lucorum	Korábek O.	2013	shell	Turkey: Artvin Prov.: Narlık	40.9958°N 41.7692°E	SMF	342471	LC38	KP072319						Korábek et al. 2015
HE001250	49	172	Lindholmia	nordmanni	Korábek O.	2013	shell	Turkey: Artvin Prov.: Yusufeli env., valley of the Çoruh Nehri, mout of a left-side tributary	40.712°N 41.392°E	NMBE	505491	NO5	KP072356						Korábek et al. 2015
HE001251	14	48	Helix	cincta	Korábek O.	2013	shell	Turkey: Aydın Prov.: Geyre env., ruins of Aphrodisias	37.7089°N 28.7242°E	SMF	342447	CN15	KP072268						Korábek et al. 2015
HE001252	14	48	Helix	cincta	Korábek O.	2013	shell	Turkey: Aydın Prov.: Güllübahçe, Priene ruins	37.6592°N 27.2974°E	SMF	coll. Schütt 1685	CN33	MT949751						Korábek et al. 2021	geographic coordinates only indicative
HE001253	24	95	Helix	lucorum	Korábek O.	2013	shell	Turkey: Bitlis Prov.: Van Gölü 25km SE Tatvan	38.4674°N 42.4814°E	NMBE	505489	LC16	MG709103						Korábek et al. 2018b
HE001254	24	96	Helix	nicaeensis	Korábek O.	2013	shell	Turkey: Bolu Prov.: Örencik, pass above Abant Gölü	40.59°N 31.27°E	NMBE	505490	TA7	KP072402						Korábek et al. 2015
HE001255	30	116	Helix	escherichi	Korábek O.	2013	shell	Turkey: Bolu Prov.: Yeniçağa Gölü	40.7816°N 32.0340°E	NMBE	505488	ES6	KP072290						Korábek et al. 2015
HE001256	30	116	Helix	escherichi	Korábek O.	2013	shell	Turkey: Bolu Prov.: Yuva env., walley of Büyüksu Deresi, Mengen Yolu	40.7992°N 31.7611°E	SMF	341612	ES9	KP072291						Korábek et al. 2015
HE001257	30	116	Helix	escherichi	Korábek O.	2013	shell	Turkey: Bolu Prov.: Yuva env., walley of Büyüksu Deresi, Mengen Yolu	40.7992°N 31.7611°E	SMF	341612	ES12	KP072289	KP072133		MW446091			Korábek et al. 2015
HE001258	24	97	Helix	nicaeensis	Korábek O.	2013	shell	Turkey: Bursa Prov.: Bursa?	40.2°N 29.1°E	SMF	73678/2	TA9	KP072404						Korábek et al. 2015	geographic coordinates only indicative, might have been collected in a broader area around Bursa
HE001259	24	95	Helix	lucorum	Korábek O.	2015	shell	Turkey: Bursa Prov.: Uludağ	40.1026°N 29.1324°E	NMP	P6M 30051	LC89A	MG709104						Korábek et al. 2018b
HE001260	24	95	Helix	lucorum	Korábek O.	2013	shell	Turkey: Çanakkale Prov.: road between Çanakkale and Lapseki	40.2314°N 26.5519°E	SMF	342470	LC30	KP072318						Korábek et al. 2015
HE001261	26	99	Helix	pathetica	Korábek O.	2013	shell	Turkey: Çorum Prov.: road D795 near Pınarbaşı	40.6806°N 35.2928°E	SMF	342484	PA1	KP072367	KP072175					Korábek et al. 2015
HE001262	14	48	Helix	cincta	Korábek O.	2013	shell	Turkey: Denizli Prov.: Pamukkale, ruins of Hierapolis	37.9308°N 29.1222°E	NMBE, SMF	565435, 342452	CN1	KF823038	KF823074					Korábek et al. 2014
HE001263	14	48	Helix	cincta	Korábek O.	2013	shell	Turkey: Denizli Prov.: S of Denizli, Cankurtaran env.	37.66°N 29.23°E	NMBE	505487	CN2	MT949752						Korábek et al. 2021
HE001264	41	140	Maltzanella	sp.	Korábek O.	2013	shell	Turkey: Edirne Prov.: Kocaçeşme env., Kuru Dağı Milli Parkı, pine forest	40.7092°N 26.7644°E	SMF	342502	MT1	KP072351	KP072192					Korábek et al. 2015
HE001265	49	172	Lindholmia	nordmanni	Neiber M. T.		shell	Turkey: Erzurum Prov.: 11 km along the road from Ispir towards Bayburt	40.5522°N 41.0553°E	ZMH	96193	402	KP072198	KP072189	MW465525	MW446092	MW465473		Korábek et al. 2015
HE001266	24	93	Helix	lucorum	Korábek O.	2013	shell	Turkey: Erzurum Prov.: Ispir, castle	40.4836°N 40.9947°E	SMF	342466	LC12	KP072312	KP072127					Korábek et al. 2015
HE001267	24	96	Helix	nicaeensis	Korábek O.	2013	shell	Turkey: Eskişehir Prov.: İnönü env.	39.81°N 30.13°E	SMF	21446/1	TA8	KP072403	MG722982					Korábek et al. 2015
HE001268	13	45	Helix	buchii	Korábek O.	2013	shell	Turkey: Giresun Prov.: Espiye, Andoz Kalesi	40.9412°N 38.6906°E	SMF	342510	SP2	KP072394	MW443939					Korábek et al. 2015
HE001269	13	45	Helix	buchii	Korábek O.	2013	shell	Turkey: Giresun Prov.: Espiye, Andoz Kalesi	40.9412°N 38.6906°E	SMF	342510	SP4	KP072396	KP072161					Korábek et al. 2015
HE001270	13	45	Helix	buchii	Korábek O.	2013	mtDNA	Georgia: Dzindzisu River east of Goderdzi Pass	41.6366°N 42.5797°E	coll. Mumladze L.?		BC12	KP072252	KP072162					Korábek et al. 2015	locality given in Korábek et al. 2015 was incorrect, swapped with BC13
HE001271	13	45	Helix	buchii	Korábek O.	2013	mtDNA	Georgia: Dzindzisu River east of Goderdzi Pass	41.6366°N 42.5797°E	coll. Mumladze L.?		BC14	KP072254	KP072163	MW465526	MW446093			Korábek et al. 2015	locality given in Korábek et al. 2015 was incorrect, swapped with BC13
HE001272	26	99	Helix	pathetica	Korábek O.	2013	mtDNA	Turkey: Gümüşhane Prov.: Kelkit env., Gözen Koyü	40.1942°N 39.4303°E	no voucher		NO6	KP072357	KP072176					Korábek et al. 2015	in the 2015 paper voucher reported erroneously as SMF 342483
HE001273	34	130	Helix	salomonica	Korábek O.	2013	shell	Turkey: Hakkâri Prov.: Hakkâri, castle	37.5695°N 43.7391°E	NMBE	505493	SL1	KP072390	KP072098					Korábek et al. 2015
HE001274	14	51	Helix	fathallae	Korábek O.	2013	shell	Turkey: Hatay Prov.: Akboz (Akbes)	36.85°N 36.55°E	SMF	24314	FA8	KP072295						Korábek et al. 2015	geographic coordinates only indicative
HE001275	15	54	Helix	fathallae	Korábek O.	2013	shell	Turkey: Hatay Prov.: Çevlik, Titus Vespasianus Tüneli	36.1214°N 35.9222°E	SMNS	ZI0100716	FA9	KP072297			MW446094	MW465474		Korábek et al. 2015
HE001276	15	54	Helix	fathallae	Korábek O.	2013	shell	Turkey: Hatay Prov.: Çevlik, Titus Vespasianus Tüneli	36.1214°N 35.9222°E	SMF	342456	FA2	KP072293	KP072116					Korábek et al. 2015
HE001277	42	148	Levantina	spiriplana	Korábek O.	2013	shell	Turkey: Hatay Prov.: Hatay (Antakya), St. Pyetro Kilisesi	36.2089°N 36.1781°E	SMF	342446	LV1	KP072332	KP072181					Korábek et al. 2015	subsp. caesareana
HE001278	42	148	Levantina	spiriplana	Korábek O.	2013	shell	Turkey: Hatay Prov.: Hatay (Antakya), St. Pyetro Kilisesi	36.2089°N 36.1781°E	SMF	342446	LV14	OL891825	OL862430					Korábek et al. in review	subsp. caesareana
HE001279	14	49	Helix	valentini	Korábek O.	2013	shell	Turkey: Hatay Prov.: Hatay (Antakya), St. Pyetro Kilisesi	36.2089°N 36.1781°E	SMF	342450	AN1	KP072206	KP072114		MW446095			Korábek et al. 2015
HE001280	14	49	Helix	valentini	Korábek O.	2013	shell	Turkey: Hatay Prov.: Hatay (Antakya), St. Pyetro Kilisesi	36.2089°N 36.1781°E	SMF	342450	AN2	KP072207						Korábek et al. 2015
HE001281	32	121	Helix	nucula	Korábek O.	2013	shell	Turkey: Hatay Prov.: Hatay (Antakya), St. Pyetro Kilisesi	36.2089°N 36.1781°E	SMNS	ZI0100717	MS10	KP072347						Korábek et al. 2015	Helix pachya sensu Neubert 2014
HE001282	14	52	Helix	fathallae	Korábek O.	2013	shell	Turkey: Hatay Prov.: İskenderun, gorge above city	36.6°N 36.2°E	SMNS	ZI0100718	FA81	KP072296						Korábek et al. 2015	geographic coordinates only indicative
HE001283	42	159	Levantina	naegelei	Korábek O.	2015	shell	Turkey: Hatay Prov.: Ötençay env., Bakras Kalesi	36.4261°N 36.2247°E	SMF	342530	LV7	KP072336	KP072185					Korábek et al. 2015
HE001284	32	122	Helix	nucula	Korábek O.	2013	shell	Turkey: Hatay Prov.: Tekebaşı env., 2 km in direction Meydan	36.059°N 35.982°E	SMNS	ZI0100719	MS11	KP072348	KP072100					Korábek et al. 2015	Helix pachya sensu Neubert 2014
HE001285	14	50	Helix	anctostoma	Korábek O.	2013	shell	Turkey: Hatay Prov.: Tell on Orontes above Antakya (Tell Açana?)	36.24°N 36.38°E	NMBE	520414/2	CN26	KP072273	KP072115	MW465489	MW446096			Korábek et al. 2015	geographic coordinates only indicative
HE001286	50	173	Amanica	praecellens	Korábek O.	2013	shell	Turkey: Hatay Prov.: Yeniköy 4 km above Payas	36.8°N 36.3°E	SMNS	ZI0050435	IS5	KP072310	KP072191	MW465527	MW446097	MW465475		Korábek et al. 2015	geographic coordinates only indicative	MW465462
HE001287	14	50	Helix	anctostoma	Korábek O.	2013	shell	Turkey: Hatay Prov.: Yeşilova env., Hüyük and Orontes bank, ca. 7 km from the periphery in direction Aleppo	36.2678°N 36.2553°E	SMF	coll. Schütt 82/32	CN9	KP072277						Korábek et al. 2015
HE001288	39	138	Maltzanella	dickhauti	Korábek O.	2013	shell	Turkey: Isparta Prov.: Çandır env., 16 km in direction Sütçüler	37.47°N 30.92°E	SMNS	ZI0100721	MT8	KP072354	KP072195					Korábek et al. 2015	geographic coordinates only indicative
HE001289	33	126	Helix	figulina	Korábek O.	2013	shell	Turkey: İzmir Prov.: Bergama, ruins of Pergamon	39.1339°N 27.1828°E	SMF	342458	NU1	KP072359	KP072106					Korábek et al. 2015
HE001290	24	95	Helix	lucorum	Korábek O.	2013	shell	Turkey: İzmir Prov.: Bergama, ruins of Pergamon	39.1339°N 27.1828°E	SMF	342476	LC7	KF823046	KF823082					Korábek et al. 2014
HE001291	33	127	Helix	figulina	Korábek O.	2013	shell	Turkey: İzmir Prov.: İzmir, Bornova	38.45°N 27.25°E	SMF	74191/7	FG5	KP072302						Korábek et al. 2015
HE001292	41	141	Maltzanella	maltzani	Korábek O.	2013	shell	Turkey: İzmir/Manisa Prov.: Yamanlar dağı, Karagöl	38.5572°N 27.2191°E	SMF	243987/2	MT2	KP072352	MW443940		MW446098			Korábek et al. 2015
HE001293	29	112	Helix	asemnis	Korábek O.	2013	shell	Turkey: Karaman Prov.: Madenşehir, ruins of a church	37.4383°N 33.1667°E	SMF	342430	AS4	KP072230	KP072150					Korábek et al. 2015
HE001294	29	112	Helix	asemnis	Korábek O.	2013	shell	Turkey: Karaman Prov.: Madenşehir, ruins of a church	37.4383°N 33.1667°E	SMF	342430	AS15	KP072212	KP072151					Korábek et al. 2015
HE001295	29	112	Helix	asemnis	Korábek O.	2013	shell	Turkey: Karaman Prov.: Taşkale, 1 km in direction Yeşildere	37.139°N 33.578°E	SMNS	ZI0100722	AS53	KP072244						Korábek et al. 2015
HE001296	24	89	Helix	lucorum	Korábek O.	2013	shell	Turkey: Kocaeli Prov.: Kefken	41.17°N 30.23°E	NMP	P6M 30052	LC88A	MG709105						Korábek et al. 2018b	geographic coordinates only indicative
HE001297	24	89	Helix	lucorum	Korábek O.	2013	shell	Turkey: Kocaeli/Istanbul Prov.: Değirmençayırı env.	40.9676°N 29.6662°E	NMP	P6M 30053	LC20	MG709106	MG709126					Korábek et al. 2018b
HE001298	24	95	Helix	lucorum	Korábek O.	2013	shell	Turkey: Konya Prov.: Ilgın env., gas station	38.2836°N 31.9572°E	NMP	P6M 30054	LC13	MG709062						Korábek et al. 2018b
HE001299	24	95	Helix	lucorum	Korábek O.	2013	shell	Turkey: Manisa Prov.: northern slope of Spil Daği above Manisa	38.5822°N 27.4269°E	NMP	P6M 30055	LC32	MG709107	MG709127					Korábek et al. 2018b
HE001300	28	102	Helix	asemnis	Korábek O.	2013	shell	Turkey: Mersin Prov.: Ayaş, Elaiussa Sebaste	36.4806°N 34.1750°E	SMF	360395	AS100	MW443562	MW443941		MW446099			this study
HE001301	29	111	Helix	asemnis	Korábek O.	2013	shell	Turkey: Mersin Prov.: Bolkar Dağları, road to Gözne, Yeniköy env.	36.9886°N 34.5053°E	SMF	342431	AS18	KP072215	KP072147					Korábek et al. 2015
HE001302	29	111	Helix	asemnis	Korábek O.	2013	shell	Turkey: Mersin Prov.: Bolkar Dağları, road to Gözne, Yeniköy env.	36.9886°N 34.5053°E	SMF	342431	AS47	KP072238						Korábek et al. 2015
HE001303	14	53	Helix	fathallae	Korábek O.	2013	shell	Turkey: Mersin Prov.: Bolkar Dağları, road to Gözne, Yeniköy env.	36.9886°N 34.5053°E	SMF	342457	FA6	KP072294	MW443942		MW446100			Korábek et al. 2015
HE001304	29	109	Helix	asemnis	Korábek O.	2013	shell	Turkey: Mersin Prov.: Çamlıyayla env., Sinap Kalesi	37.1897°N 34.6111°E	SMF	342432	AS46	KP072237						Korábek et al. 2015
HE001305	29	109	Helix	asemnis	Korábek O.	2013	shell	Turkey: Mersin Prov.: Darıpınarı env., Karageçidi dam	37.1481°N 34.7489°E	SMF	342433	AS19	KP072216						Korábek et al. 2015
HE001306	42	156	Levantina	cilicica	Korábek O.	2013	shell	Turkey: Mersin Prov.: Darıpınarı env., Karageçidi dam	37.1481°N 34.7489°E	SMF	360490	LV4	MW443563	MW443943					Korábek et al. in review
HE001307	29	113	Helix	asemnis	Korábek O.	2013	shell	Turkey: Mersin Prov.: Evkafçiftliği	36.4567°N 33.6367°E	SMF	342434	AS21	KP072219	KP072156					Korábek et al. 2015
HE001308	29	113	Helix	asemnis	Korábek O.	2013	shell	Turkey: Mersin Prov.: Evkafçiftliği	36.4567°N 33.6367°E	SMF	342434	AS42	KP072233	KP072155					Korábek et al. 2015
HE001309	29	109	Helix	asemnis	Korábek O.	2013	shell	Turkey: Mersin Prov.: Gülek and Gülek Kalesi	37.2692°N 34.7919°E	SMF	342435	AS1	KP072208	KP072159					Korábek et al. 2015
HE001310	29	109	Helix	asemnis	Korábek O.	2013	shell	Turkey: Mersin Prov.: Gülek and Gülek Kalesi	37.2692°N 34.7919°E	SMF	342435	AS25	KP072223	KP072160					Korábek et al. 2015
HE001311	29	114	Helix	asemnis	Korábek O.	2013	shell	Turkey: Mersin Prov.: Kizkalesi env., Adamkayalar	36.4839°N 34.1194°E	SMF	342436	AS7	KP072246	KP072152					Korábek et al. 2015
HE001312	29	114	Helix	asemnis	Korábek O.	2013	shell	Turkey: Mersin Prov.: Kizkalesi env., Adamkayalar	36.4839°N 34.1194°E	SMF	342436	AS41	KP072232	KP072154					Korábek et al. 2015
HE001313	29	114	Helix	asemnis	Korábek O.	2013	shell	Turkey: Mersin Prov.: NW of Silifke, Ekşiler env., Göksu Nehri canyon	36.4075°N 33.8081°E	SMF	342437	AS9	KP072248	KP072153					Korábek et al. 2015
HE001314	29	109	Helix	asemnis	Korábek O.	2013	shell	Turkey: Mersin Prov.: Sarıkavak env., rocks above a road	37.1169°N 34.6911°E	SMF	342438	AS23	KP072221	KP072157					Korábek et al. 2015
HE001315	28	108	Helix	asemnis	Korábek O.	2013	shell	Turkey: Mersin Prov.: Tömük Env., Elvanlı orchard	36.7118°N 34.3652°E	SMF	342439	AS2	KP072217	KP072146					Korábek et al. 2015
HE001316	28	108	Helix	asemnis	Korábek O.	2013	shell	Turkey: Mersin Prov.: Tömük Env., Elvanlı orchard	36.7118°N 34.3652°E	SMF	342439	AS40	KP072231						Korábek et al. 2015
HE001317	14	49	Helix	valentini	Korábek O.	2013	shell	Turkey: Muğla Prov.: Güneşli env., Tlos ruins and tombs	36.5550°N 29.4203°E	SMF	342504	CN4	KP072276	KP072113					Korábek et al. 2015
HE001318	32	121	Helix	nucula	Korábek O.	2013	shell	Turkey: Muğla Prov.: Güneşli env., Tlos ruins and tombs	36.5550°N 29.4203°E	SMF	342478	NU4	KP072362						Korábek et al. 2015
HE001319	32	121	Helix	nucula	Korábek O.	2013	shell	Turkey: Muğla Prov.: Güneşli env., Tlos ruins and tombs	36.5550°N 29.4203°E	SMF	342478	NU5	KP072364	KP072099					Korábek et al. 2015
HE001320	14	48	Helix	cincta	Korábek O.	2013	shell	Turkey: Muğla Prov.: Muğla env., rocks above the city	37.2°N 28.4°E	SMF	coll. Schütt 1579	CN34	KP072274						Korábek et al. 2015	geographic coordinates only indicative
HE001321	26	99	Helix	pathetica	Korábek O.	2013	shell	Turkey: Nevşehir Prov.: Nevşehir	38.6°N 34.7°E	NHMW	69088	PA3	KP072369						Korábek et al. 2015	geographic coordinates only indicative
HE001322	13	46	Helix	buchii	Neubert E.			Turkey: Trabzon Prov.: Yomra, eastern margin, bridge over Yomra Deresi	40.9525°N 39.8674°E	NMBE	505485	BC10	KP072250	MW443944					Korábek et al. 2015	incorrect locality was given by Korábek et al. 2015
HE001323	24	89	Helix	lucorum	Korábek O.	2013	shell	Turkey: Ordu Prov.: Çaytepe env., Yasun Burnu	41.1328°N 37.6819°E	SMF	342469	LC22	KP072317	KP072123					Korábek et al. 2015
HE001324	56	208	Caucasotachea	atrolabiata	Korábek O.	2017	shell	Turkey: Ordu Prov.: Ünye Kalesi	41.0958°N 37.2392°E	NMP	P6M 30191	CA11	MW443564	MW443945					this study
HE001325	13	47	Helix	buchii	Korábek O.	2013	shell	Turkey: Ordu Prov.: Ünye Kalesi	41.0958°N 37.2392°E	SMF	342444	SP1	KP072393	KP072169					Korábek et al. 2015
HE001326	13	47	Helix	buchii	Korábek O.	2013	shell	Turkey: Ordu Prov.: Ünye Kalesi	41.0958°N 37.2392°E	SMF	342444	SP3	KP072395	KP072168		MW446101			Korábek et al. 2015
HE001327	28	106	Helix	asemnis	Korábek O.	2013	shell	Turkey: Osmanyie Prov.: Kesmeburun env., ruins of Hierapolis Castabala	37.1767°N 36.1839°E	SMF	342440	AS11	KP072210	KP072143					Korábek et al. 2015
HE001328	28	106	Helix	asemnis	Korábek O.	2013	shell	Turkey: Osmanyie Prov.: Kesmeburun env., ruins of Hierapolis Castabala	37.1767°N 36.1839°E	SMF	342440	AS28	KP072225	KP072142					Korábek et al. 2015
HE001329	24	95	Helix	lucorum	Korábek O.	2013	shell	Turkey: prov. Isparta: Eğirdir	37.8781°N 30.8553°E	NMP	P6M 30056	LC1	MG709080	MG709119					Korábek et al. 2018b
HE001330	29	111	Helix	asemnis	Korábek O.	2013	shell	Turkey: prov. Mersin: Gözne, Gözne Kalesi	36.9931°N 34.5756°E	SMF	342441	AS6	KP072245	KP072148					Korábek et al. 2015
HE001331	29	111	Helix	asemnis	Korábek O.	2013	shell	Turkey: prov. Mersin: Gözne, Gözne Kalesi	36.9931°N 34.5756°E	SMF	342441	AS27	KP072224	KP072149					Korábek et al. 2015
HE001332	13	44	Helix	buchii	Korábek O.	2013	shell	Turkey: Rize Prov.: Çamlıkköy, riverbank of Çamlık	40.7025°N 40.6628°E	SMF	342442	BC1	KP072249	KP072165					Korábek et al. 2015
HE001333	13	44	Helix	buchii	Korábek O.	2013	shell	Turkey: Rize Prov.: Çamlıkköy, riverbank of Çamlık	40.7025°N 40.6628°E	SMF	342442	BC9	KP072259	KP072167					Korábek et al. 2015
HE001334	56	207	Caucasotachea	atrolabiata	Korábek O.	2013	shell	Turkey: Rize Prov.: Çayırlı, tea plantage	40.8794°N 40.4517°E	SMF	342528	CA1	KP072264	KP072188					Korábek et al. 2015
HE001335	24	89	Helix	lucorum	Korábek O.	2013	shell	Turkey: Trabzon Prov.: Altındere env., Sümela monastery	40.6900°N 39.6592°E	SMF	342473	LC5	KP072321	KP072125					Korábek et al. 2015
HE001336	13	44	Helix	buchii	Korábek O.	2013	shell	Turkey: Trabzon Prov.: Dernekpazarı env.	40.8194°N 40.2653°E	SMF	342445	BC11	KP072251						Korábek et al. 2015
HE001337	24	89	Helix	lucorum	Korábek O.	2013	shell	Turkey: Trabzon Prov.: Maçka env., Meryemana	40.7897°N 39.6161°E	no voucher		LC110	MW443565						this study
HE001338	27	100	Helix	buchii	Korábek O.	2013	shell	Turkey: Trabzon Prov.: Sümela monastery	40.6894°N 39.6589°E	SMF	342443	BC2	KP072256	KP072177					Korábek et al. 2015
HE001339	24	93	Helix	lucorum	Korábek O.	2013	shell	Turkey: Tunceli Prov.: Tunceli Ovacık Yolu, 20 km from Tunceli	39.2214°N 39.4747°E	SMF	342472	LC4	KP072320	KP072126					Korábek et al. 2015
HE001340	24	93	Helix	lucorum	Korábek O.	2013	shell	Turkey: Yozgat prov. (west): Derbent env.	39.9844°N 34.6556°E	SMF	342465	LC11	KP072311	KP072128					Korábek et al. 2015
HE001341	24	93	Helix	lucorum	Korábek O.	2013	shell	Turkey: Zonguldak Prov.: city walls of Zonguldak	41.45°N 31.79°E	coll. Hausdorf B.	669	LCN	KP072325	MG709129					Korábek et al. 2015
HE001342	13	46	Helix	buchii	Korábek O.	2013	shell	Turkey: Ordu Prov.: W of Perşembe, İstanbulboğazı env.	41.068°N 37.722°E	NMBE	505486	BC8	KP072258						Korábek et al. 2015
HE001343	24	93	Helix	lucorum	Korábek O.	2013	shell	Ukraine: Crimea: Bakhchisaray	44.7528°N 33.8608°E	SMF	342467	LC2	KP072315	KP072129					Korábek et al. 2015
HE001344	24	93	Helix	lucorum	Korábek O.	2013	shell	Ukraine: Crimea: Bakhchisaray	44.7528°N 33.8608°E	SMF	342467	LC17	KP072313						Korábek et al. 2015
HE001345	5	15	Helix	thessalica	Korábek O.	2017	shell&genital	Ukraine: Cherkasy Oblast: forest S of Tymoshivka	48.9460°N 32.0828°E	NMP	P6M 30158	TH13	MK482898	MK483069					Korábek et al. 2020
HE001346	55	205	Caucasotachea	vindobonensis	Korábek O.	2017	shell	Ukraine: Cherkasy Oblast: road south of Kedyna Hora	49.5780°N 32.0136°E	NMP	P6M 30127	CV124	MK482811	MK482985					Korábek et al. 2020
HE001347	5	15	Helix	thessalica	Korábek O.	2017	shell&genital	Ukraine: Chernivtsi Oblast: Chernivtsi, floodplain forest on the left bank of the Prut River	48.3151°N 25.9105°E	NMP	P6M 30173	TH21	MK482905						Korábek et al. 2020
HE001348	12	43	Helix	lutescens	Korábek O.	2017	shell	Ukraine: Chernivtsi Oblast: Khotyn, castle	48.5228°N 26.4974°E	NMP	P6M 30307	LT73	MW443566						this study
HE001349	11	36	Helix	pomatia	Korábek O.	2017	shell&genital	Ukraine: Chernivtsi Oblast: margin of forest NW of Kaplivka	48.4622°N 26.4892°E	NMP	P6M 30002	P_985	MF943919						Korábek et al. 2018a
HE001350	12	43	Helix	lutescens	Korábek O.	2015	shell	Ukraine: Chernivtsi Oblast: Nova Zhadova, bank of Mikhidra river	48.2233°N 25.5438°E	NMP	P6M 30301	LT62	MW443567						this study
HE001351	24	93	Helix	lucorum	Balashov I.	2015	shell	Ukraine: Crimea: Balaklava District, Baidarskii reserve, near Morozovka	44.5241°N 33.6937°E	coll. Balashov I.		LC102	MG709108	MG709128					Korábek et al. 2018b
HE001352	24	93	Helix	lucorum	Balashov I.	2015	shell	Ukraine: Crimea: Balaklava District, Baidarskii reserve, near Morozovka	44.5241°N 33.6937°E	coll. Balashov I.		LC103	MG709086	MG709121					Korábek et al. 2018b
HE001353	2	3	Helix	albescens	Korábek O.	2016	shell	Ukraine: Crimea: Feodosia, Anyunasa St.	45.0444°N 35.3596°E	SMF	360387	AL6	MW443568						this study
HE001354	2	3	Helix	albescens	Korábek O.	2013	shell	Ukraine: Crimea: Feodosiya	45.0372°N 35.3803°E	SMF	342418	AL3	KP072203	KP072119					Korábek et al. 2015
HE001355	2	3	Helix	albescens	Korábek O.	2013	shell	Ukraine: Crimea: Mizhvodne	45.59°N 32.84°E	SMF	342417	AL1	KP072201	KP072118					Korábek et al. 2015	geographic coordinates only indicative
HE001356	11	36	Helix	pomatia	Korábek O.	2015	shell	Ukraine: Ivano-Frankivs'k Oblast: Kryvorivnya, road to Verkhovyna	48.1760°N 24.8952°E	NMP	P6M 29865	P_579	MF943569						Korábek et al. 2018a
HE001357	11	36	Helix	pomatia	Korábek O.	2015	shell	Ukraine: Ivano-Frankivs'k Oblast: Kryvorivnya, road to Verkhovyna	48.1760°N 24.8952°E	NMP	P6M 29865	P_814	MF943864	MF944066					Korábek et al. 2018a
HE001358	11	36	Helix	pomatia	Korábek O.	2015	shell	Ukraine: Ivano-Frankivs'k Oblast: Kuty	48.2490°N 25.1543°E	NMP	P6M 29866	P_580	MF943568						Korábek et al. 2018a
HE001359	11	36	Helix	pomatia	Snegin E. A.	2015	shell	Ukraine: Kharkiv'ska oblast': Kharkiv, Taras Shevchenko park	50.0044°N 36.2253°E	no voucher		P_573	MF943604						Korábek et al. 2018a	geographic coordinates only indicative
HE001360	5	15	Helix	thessalica	Korábek O.	2017	shell&genital	Ukraine: Khmel’nytskyi Oblast: forest E of Kuz’myn	49.2615°N 26.5676°E	NMP	P6M 30162	TH15	MK482900						Korábek et al. 2020
HE001361	11	36	Helix	pomatia	Korábek O.	2017	shell&genital	Ukraine: Kirovohrad Oblast: Ploske	48.8479°N 32.6742°E	NMP	P6M 30006	P_990	MF943923	MF944079					Korábek et al. 2018a
HE001362	5	15	Helix	thessalica	Korábek O.	2017	shell&genital	Ukraine: Kirovohrad Oblast: Torhovytsya by Novoarkhanhel’s’k, bank of the river Synyukha	48.6645°N 30.7922°E	NMP	P6M 30165	TH17	MK482902						Korábek et al. 2020
HE001363	55	205	Caucasotachea	vindobonensis	Korábek O.	2017	shell	Ukraine: Kirovohrad Oblast: Velika Vyska	48.5662°N 31.8595°E	NMP	P6M 30131	CV123	MK482810	MK482984					Korábek et al. 2020
HE001364	5	15	Helix	thessalica	Korábek O.	2017	shell&genital	Ukraine: Kyiv Oblast: Bohuslav, forest E of town	49.5434°N 30.9005°E	NMP	P6M 30166	TH14	MK482899						Korábek et al. 2020
HE001365	11	36	Helix	pomatia	Snegin E. A.	2015	shell	Ukraine: Kyiv, A.V. Fomin botanical garden	50.4429°N 30.5054°E	no voucher		P_572	MF943606						Korábek et al. 2018a	geographic coordinates only indicative
HE001366	12	43	Helix	lutescens	Korábek O.	2017	shell	Ukraine: L’viv Obast: Tyshivnytsya, left bank of the river Stryi	49.0977°N 23.6141°E	NMP	P6M 30305	LT71	MW443569						this study
HE001367	11	36	Helix	pomatia	Korábek O.	2017	shell	Ukraine: L’viv Oblast: forest by road M11 W of Konopnytsya	49.8087°N 23.8512°E	NMP	P6M 30013	P_979	MF943929						Korábek et al. 2018a
HE001368	11	36	Helix	pomatia	Korábek O.	2017	shell	Ukraine: L’viv Oblast: Kremenets, castle	50.0950°N 25.7302°E	NMP	P6M 30010	P_987	MF943927						Korábek et al. 2018a
HE001369	11	36	Helix	pomatia	Korábek O.	2017	shell	Ukraine: L’viv Oblast: Pidhirtsi, forest by road to Hrabovo	49.9232°N 24.9810°E	NMP	P6M 30012	P_991	MF943928						Korábek et al. 2018a
HE001370	11	36	Helix	pomatia	Korábek O.	2015	shell	Ukraine: L’vivs’ka Oblast: between Dovholuka and Ulychne, bank of Kolodnytsya river	49.2082°N 23.6687°E	NMP	P6M 29862	P_450	MF943577						Korábek et al. 2018a
HE001371	11	36	Helix	pomatia	Korábek O.	2015	shell	Ukraine: L’vivs’ka Oblast: Staryi Sambir, bridge over Yablunka river	49.4513°N 23.0008°E	NMP	P6M 29863	P_602	MF943578	MF943996					Korábek et al. 2018a
HE001372	11	36	Helix	pomatia	Korábek O.	2015	shell	Ukraine: L’vivs’ka Oblast: Turka env.	49.1787°N 23.0448°E	NMP	P6M 29864	P_586	MF943579						Korábek et al. 2018a
HE001373	55	203	Caucasotachea	vindobonensis	Korábek O.	2016	shell	Ukraine: Odes’ka oblast’: N of Zatoka, near Studencheskaya railway station	46.1605°N 30.5544°E	NMP	P6M 29996	CV59	MK482851	MK483025					Korábek et al. 2020
HE001374	55	203	Caucasotachea	vindobonensis	Korábek O.	2016	shell	Ukraine: Odes’ka oblast’: N of Zatoka, near Studencheskaya railway station	46.1605°N 30.5544°E	NMP	P6M 29996	CV64	MK482857	MK483031					Korábek et al. 2020
HE001375	55	203	Caucasotachea	vindobonensis	Korábek O.	2016	shell	Ukraine: Odes’ka oblast’: N of Zatoka, near Studencheskaya railway station	46.1605°N 30.5544°E	NMP	P6M 29996	CV67	MK482858	MK483032					Korábek et al. 2020
HE001376	12	43	Helix	lutescens	Korábek O.	2017	shell	Ukraine: Ternopil’ Oblast: Buchach, bank of Strupa	49.0543°N 25.4045°E	NMP	P6M 30299	LT74	MW443570						this study
HE001377	11	36	Helix	pomatia	Korábek O.	2017	shell	Ukraine: Ternopil’ Oblast: forest margin W of Hutys’ko	49.3970°N 24.8100°E	NMP	P6M 30001	P_980	MF943918						Korábek et al. 2018a
HE001378	11	36	Helix	pomatia	Korábek O.	2017	shell	Ukraine: Ternopil’ Oblast: forest W of Chornyi Lis	49.7137°N 25.7431°E	NMP	P6M 30009	P_986	MF943926						Korábek et al. 2018a
HE001379	55	205	Caucasotachea	vindobonensis	Korábek O.	2017	shell	Ukraine: Ternopil’ Oblast: Nyrkiv env.	48.8055°N 25.5849°E	no voucher		CV122	MK482809	MK482983					Korábek et al. 2020
HE001380	5	15	Helix	thessalica	Korábek O.	2017	shell&genital	Ukraine: Ternopil’ Oblast: Nyrkiv env., forests above the river Dzhuryn	48.8047°N 25.5875°E	NMP	P6M 30168	TH20	MK482904						Korábek et al. 2020
HE001381	5	15	Helix	thessalica	Korábek O.	2017	shell&genital	Ukraine: Ternopil’ Oblast: Terebovlya, forest W of the town	49.2915°N 25.6554°E	NMP	P6M 30169	TH16	MK482901						Korábek et al. 2020
HE001382	11	36	Helix	pomatia	Korábek O.	2017	shell&genital	Ukraine: Vinnytsya Oblast: forest by Ukrains’ke E of Kopaihorod	48.8206°N 27.8511°E	NMP	P6M 30004	P_983	MF943920						Korábek et al. 2018a
HE001383	11	36	Helix	thessalica/pomatia	Korábek O.	2017	shell	Ukraine: Vinnytsya Oblast: Illintsi, forest margin by cemetery	49.0900°N 29.2270°E	NMP	P6M 30171	P_982	MW443571						this study
HE001384	11	36	Helix	pomatia	Korábek O.	2017	shell&genital	Ukraine: Vinnytsya Oblast: Kotyuzhany	48.7523°N 27.6988°E	NMP	P6M 30003	P_984	MF943921						Korábek et al. 2018a
HE001385	11	36	Helix	pomatia	Korábek O.	2017	shell	Ukraine: Vinnytsya Oblast: near Zhmerynka, forest by road to Podil’s’ke	49.0535°N 28.0492°E	NMP	P6M 30005	P_981	MF943922						Korábek et al. 2018a
HE001386	11	36	Helix	thessalica	Korábek O.	2017	shell&genital	Ukraine: Vinnytsya Oblast: Verbovets	48.7240°N 27.4333°E	NMP	P6M 30172	TH18	MW443572						this study
HE001387	11	36	Helix	cf. pomatia	Korábek O.	2017	shell&mtDNA	Ukraine: Vinnytsya, forest by the lake Hural’nya	49.2626°N 28.4354°E	NMP	P6M 30340	TH19	MW443573						this study
HE001388	12	43	Helix	lutescens	Korábek O.	2017	shell	Ukraine: Vinnytsya, right bank of the Pivdennyi Buh River	49.2385°N 28.4705°E	NMP	P6M 30304	LT72	MW443574						this study
HE001389	11	36	Helix	pomatia	Korábek O.	2015	shell	Ukraine: Zakarpats'ka Oblast: Berehove, northern margin	48.2297°N 22.6425°E	NMP	P6M 29868	P_442	MF943574						Korábek et al. 2018a
HE001390	55	203	Caucasotachea	vindobonensis	Korábek O.	2015	shell	Ukraine: Zakarpats'ka Oblast: between Boharevytsya and Midyanystya	48.2980°N 22.9365°E	NMP	P6M 29997	CP14	MK482737	MK482914					Korábek et al. 2020
HE001391	11	36	Helix	pomatia	Korábek O.	2015	shell	Ukraine: Zakarpats'ka Oblast: between Vuchkove and Protyven'	48.4063°N 23.5807°E	NMP	P6M 29869	P_446	MF943573	MF943995					Korábek et al. 2018a
HE001392	55	203	Caucasotachea	vindobonensis	Korábek O.	2015	shell	Ukraine: Zakarpats'ka Oblast: Lukovo	48.3208°N 23.1818°E	NMP	P6M 29998	CP12	MK482735	MK482912					Korábek et al. 2020
HE001393	11	36	Helix	pomatia	Korábek O.	2015	shell	Ukraine: Zakarpats'ka Oblast: Pasika env.	48.5342°N 22.8902°E	NMP	P6M 29870	P_588	MF943575						Korábek et al. 2018a
HE001394	55	203	Caucasotachea	vindobonensis	Korábek O.	2015	shell	Ukraine: Zakarpats'ka Oblast: Pasika env.	48.5342°N 22.8902°E	NMP	P6M 29999	CP16	MK482739	MK482916					Korábek et al. 2020
HE001395	55	203	Caucasotachea	vindobonensis	Korábek O.	2015	shell	Ukraine: Zakarpats'ka Oblast: Pasika env.	48.5342°N 22.8902°E	NMP	P6M 29999	CV45	MK482836	MK483010					Korábek et al. 2020
HE001396	11	36	Helix	pomatia	Korábek O.	2015	shell	Ukraine: Zakarpats'ka Oblast: Pidpolozzya env.	48.7557°N 23.0177°E	NMP	P6M 29871	P_601	MF943576						Korábek et al. 2018a
HE001397	11	36	Helix	pomatia	Korábek O.	2015	shell	Ukraine: Zakarpats'ka Oblast: Pidpolozzya env.	48.7557°N 23.0177°E	NMP	P6M 29871	P_813	MF943866	MF944068					Korábek et al. 2018a
HE001398	11	36	Helix	pomatia	Korábek O.	2015	shell	Ukraine: Zakarpats'ka Oblast: Uzhok	48.9903°N 22.8718°E	NMP	P6M 29872	P_604	MF943580						Korábek et al. 2018a
HE001399	11	36	Helix	pomatia	Korábek O.	2015	shell	Ukraine: Zakarpats'ka Oblast: Vil'shany	48.3308°N 23.6012°E	NMP	P6M 29873	P_443	MF943572	MF943994					Korábek et al. 2018a
HE001400	11	36	Helix	pomatia	Korábek O.	2015	shell	Ukraine: Zakarpats’ka Oblast: Lazeshchyna	48.2847°N 24.4200°E	NMP	P6M 29874	P_605	MF943570						Korábek et al. 2018a
HE001401	11	36	Helix	pomatia	Korábek O.	2015	shell	Ukraine: Zakarpats’ka Oblast: south of Rakhiv	48.0237°N 24.1670°E	NMP	P6M 29875	P_587	MF943571						Korábek et al. 2018a
HE001402	11	36	Helix	pomatia	Korábek O.	2015	shell	Ukraine: Zakarpats’ka Oblast: south of Rakhiv	48.0237°N 24.1670°E	NMP	P6M 29875	P_815	MF943865	MF944067					Korábek et al. 2018a
HE001403	55	203	Caucasotachea	vindobonensis	Korábek O.	2015	shell	Ukraine: Zakarpats’ka Oblast: south of Rakhiv	48.0237°N 24.1670°E	NMP	P6M 30000	CP9	MK482781	MK482958					Korábek et al. 2020
HE001404	55	203	Caucasotachea	vindobonensis	Korábek O.	2015	shell	Ukraine: Zakarpats’ka Oblast: south of Rakhiv	48.0237°N 24.1670°E	NMP	P6M 30000	CV46	MK482837	MK483011					Korábek et al. 2020
HE001405	12	43	Helix	lutescens	Korábek O.	2017	shell	Ukraine: Zhytomyr Oblast: Berdychiv, pond bank below monastery	49.8966°N 28.5745°E	NMP	P6M 30306	LT70	MW443575						this study
HE001406	11	36	Helix	pomatia	Korábek O.	2017	shell&genital	Ukraine: Zhytomyr Oblast: forest NE of Lyubar	49.9485°N 27.8003°E	NMP	P6M 30008	P_989	MF943925						Korábek et al. 2018a
HE001407	11	36	Helix	pomatia	Korábek O.	2017	shell&genital	Ukraine: Zhytomyr Oblast: Popil’nya, forest NE of the town	49.9771°N 29.4792°E	NMP	P6M 30007	P_988	MF943924						Korábek et al. 2018a
HE001408	11	36	Helix	pomatia	Snegin E. A.	2015	shell	Ukraine: Zhytomyrs’ka oblast: Zhytomyr, across the Teteriv River from Park imeni Y. Gagarina	50.2386°N 28.6689°E	no voucher		P_574	MF943605						Korábek et al. 2018a	geographic coordinates only indicative
HE001409	11	36	Helix	pomatia	Snegin E. A.	2015	shell	Ukraine: Zhytomyrs’ka oblast: Zhytomyr, across the Teteriv River from Park imeni Y. Gagarina	50.2386°N 28.6689°E	no voucher		P_357	MF943868						Korábek et al. 2018a	geographic coordinates only indicative
HE001410	28	103	Helix	asemnis	Korábek O.	2013	shell	Turkey: Adana Prov.: Kelerbaşi env., walley under Aladağ Geçidi, road to Imamoğlu	37.4947°N 35.3981°E	SMF	342424	AS50	KP072241	KP072138					Korábek et al. 2015
HE001411	28	103	Helix	asemnis	Korábek O.	2013	shell	Turkey: Adana Prov.: Kelerbaşi env., walley under Aladağ Geçidi, road to Imamoğlu	37.4947°N 35.3981°E	SMF	342424	AS51	KP072242						Korábek et al. 2015
HE001412	28	102	Helix	asemnis	Korábek O.	2013	shell	Turkey: Adana Prov.: Dumlu, Dumlu Kalesi	37.1528°N 35.7022°E	SMF	342422	AS52	KP072243						Korábek et al. 2015
HE001413	8	26	Helix	cf. pomatia	Korábek O.	2016	shell	Bosnia and Herzegovina: Fed. of Bosnia and Herz.: Vogošća	43.9029°N 18.3302°E	NMP	P6M 29130	P_846	MF943900	MF944074					Korábek et al. 2018a
HE001414	56	210	Caucasotachea	atrolabiata	authors			Russia: Krasnodar Oblast: Verkhnebakanskiy, 1.3 km along the road towards Anapa, deciduous forest	44.8542°N 37.6433°E	ZMH	86982		KR705005	KR705042		KR705097			Neiber & Hausdorf 2015
HE001415	56	207	Caucasotachea	atrolabiata	authors			Georgia: Imereti: Kutaisi, Motsameta monastery	42.2831°N 42.7575°E	ZMH	86477		KR705006	KR705043		KR705098			Neiber & Hausdorf 2015
HE001416	56	211	Caucasotachea	atrolabiata	authors			Turkey: Giresun Prov.: Tekkeköy, 15 km along the road S of junction Giresun towards Dereli	40.8192°N 38.4725°E	ZMH	96343		KR705007	KR705044		KR705099			Neiber & Hausdorf 2015
HE001417	57	215	Caucasotachea	leucoranea	authors			Azerbaijan: Lǝnkǝran Prov.: Hirkan, near Daştatük, 2 km NW of the northern edge of Xanbulan reservoir	38.68°N 48.7506°E	coll. Walther F.	1607			KR705045		KR705100			Neiber & Hausdorf 2015	16S removed as it appeared to be of low quality
HE001418	55	203	Caucasotachea	vindobonensis	authors			Hungary: Békés county: Doboz, Populus forest along River Fekete-Körös 3.5 km SE of Doboz	46.7067°N 21.2869°E	ZMH	96663		KR705009	KR705046		KR705101			Neiber & Hausdorf 2015
HE001419	55	203	Caucasotachea	vindobonensis	authors			Romania: Mehedinți county: 1.8 km along the road S of Dubova	44.5939°N 22.2542°E	ZMH	96788		KR705010	KR705047		KR705102			Neiber & Hausdorf 2015
HE001420	55	205	Caucasotachea	vindobonensis	authors			Russia: Stavropol' Oblast: Kochubeyevskoye, banks of river Kura river between bridge and village Barsukovskoye	44.7114°N 41.8317°E	coll. Neiber M. T.	2547-Hel		KR705011	KR705048		KR705103			Neiber & Hausdorf 2015
HE001421	58	219	Neocrassa	neocrassa	authors			Greece: Corfu: Angelocastro S of Krini	39.6789°N 19.6864°E	coll. Neiber M. T.	2549-Hel	MN145	KR705012	KR705049	MW465528	MW446102	MW465476		Neiber & Hausdorf 2015	completely resequenced by Korábek O.	MW465461
HE001422	2	2	Helix	albescens	authors			Russia: Respublika Adygeya: Lagonakskiy Khrebet, limestone cliffs on SW slope of Gora Matuk	44.1061°N 39.9225°E	ZMH	86900		KR705013	KR705050					Neiber & Hausdorf 2015
HE001423	24	89	Helix	lucorum	authors			Georgia: Imereti: Chiat'ura, Katskhis Sveti monastery	42.2875°N 43.2167°E	coll. Neiber M. T.	2526-Hel		KR705014	KR705051					Neiber & Hausdorf 2015
HE001424	24	96	Helix	nicaeensis	authors			Turkey: Bilecik Prov.: Zemzemiye, 2 km towards Sögüt	39.8833°N 30.2553°E	ZMH			KR705015	KR705052					Neiber & Hausdorf 2015
HE001425	11	36	Helix	pomatia	authors			Germany: Niedersachsen: Hannover-Anderten, N side of the Mittelland Canal	52.3586°N 9.8681°E	coll. Neiber M. T.	2551-Hel	MN12	KR705016	KR705053		KR705105			Neiber & Hausdorf 2015	16S resequenced by Korábek O.
HE001426	42	146	Levantina	spiriplana	authors			Israel: Nataf, 10 km W of Jerusalem	31.8292°N 35.0667°E			ZMH0467	KR705017	KR705054					Neiber & Hausdorf 2015	geographic coordinates only indicative; tissue extracted from ZMH 37387
HE001427	48	171	Lindholmia	christophi	authors			Turkey: Artvin Prov.: Ardanuç Canyon	41.1308°N 42.0481°E	ZMH	96160		KR705018	KR705055		KR705106			Neiber & Hausdorf 2015
HE001428	49	172	Lindholmia	nordmanni	authors			Georgia: Samtskhe-Javakheti: Minadze, 2.5 km along the road towards Aspindza	41.6225°N 43.0678°E	ZMH	100413		KR705019	KR705056		KR705107			Neiber & Hausdorf 2015
HE001429	55	203	Caucasotachea	vindobonensis	authors			Austria: Niederösterreich: Perchtoldsdorf	48.118°N 16.313°E	NHMW	51761		KF596834	KF596881		KF596786			Cadahía et al. 2014	geographic coordinates only indicative
HE001430	42	146	Levantina	spiriplana	Korábek O.	2016	mtDNA&origin	Israel: Ksalon	31.77°N 35.05°E	MVHN	050710FC01		KJ458534						Razkin et al. 2015	geographic coordinates only indicative
HE001431	17	62	Helix	melanostoma	authors			Spain: Valencia: Llombai	39.28°N -0.57°E	MVHN	783		KJ458524						Razkin et al. 2015	geographic coordinates only indicative; for locality see Martínez-Ortí A. (2002): Sobre recientes hallazgos de helícidos introducidos en España. Noticiario SEM, 38: 50
HE001432	11	36	Helix	pomatia	authors			Italy: Friuli-Venezia Giulia: Lago di Cavazzo near Cavazzo Carnico	46.33°N 13.07°E				AY741411						Manganelli et al. 2005	geographic coordinates only indicative
HE001433	4	9	Helix	straminea	Korábek O.	2014	mtDNA&origin	Italy: Tuscany: Siena, Fortezza Medicea	43.09°N 11.78°E				AY741410						Manganelli et al. 2005	geographic coordinates only indicative
HE001434	23	88	Helix	ceratina	Falkner G.		shell	France: Corsica: Ajaccio: Campo dell’Oro	41.9097°N 8.7964°E	SMNS	ZI0105032	CE1	MT949753						Korábek et al. 2021
HE001435	24	94	Helix	lucorum	Korábek O.	2018	shell	Azerbaijan: Şamaxı Rayon: Dǝmirçi	40.8405°N 48.5654°E	NMP	P6M 30402	LC133	MW443583		MW465529	MW446103	MW465477		this study
HE001436	24	89	Helix	lucorum	authors			Greece: West Macedonia: Kozani	40.28°N 21.78°E				MT298682	MT293861					Dimzas et al. 2020
HE001437	24	91	Helix	lucorum	Korábek O.	2018	shell	Azerbaijan: Çuxuryurd north of Şamaxı	40.7117°N 48.6246°E	NMP	P6M 30401	LC134	MW443584						this study
HE001438	19	66	Helix	borealis	Korábek O.	2018	shell	Greece: Peloponnese: Kalyvia env., Zevgolatio, by the river Ladonas	37.8294°N 22.1303°E	NMBE	565396	BR33	MT949754	MT947423					Korábek et al. 2021
HE001439	55	205	Caucasotachea	vindobonensis	Korábek O.	2020	shell	Hungary: Bács-Kiskun County: Bócsa	46.582°N 19.443°E	Centre for Biodiversity Genomics	BIOUG37881-H08								Layton et al. 2019	BOLD: FTMWO224-18
HE001440	16	55	Helix	pronuba	Korábek O.	2015	mtDNA&origin	Greece: southeast Crete: Tsoutsouros	34.99°N 25.29°E	NHMC			KF114834						Psonis et al. 2015	geographic coordinates only indicative, accuracy of the sequence is doubtful (see text for explanation)
HE001441	16	56	Helix	pronuba	Korábek O.	2015	mtDNA&origin	Greece: Cyclades: Anafi Island	36.37°N 25.77°E	NHMC			KF114836						Psonis et al. 2015	geographic coordinates only indicative
HE001442	20	69	Helix	borealis	Korábek O.	2015	mtDNA&origin	Greece: Crete: between Alikampos and Kournas	35.33°N 24.25°E	NHMC	50.21884		KF114823	KF114809					Psonis et al. 2015	geographic coordinates only indicative
HE001443	19	68	Helix	borealis	Korábek O.	2015	mtDNA&origin	Greece: Kerkyra (Corfu): Pantokratoras mt., Petaleia	39.750°N 19.840°E	NHMC	50.30237		KF114826	KF114810					Psonis et al. 2015	geographic coordinates only indicative, accuracy of the sequence is doubtful (see text for explanation)
HE001444	17	63	Helix	melanostoma	Korábek O.	2015	mtDNA&origin	Tunisia: El Krieb (Al Karib?)	36.32°N 9.13°E	NHMC			KF114827	KF114816					Psonis et al. 2015	geographic coordinates only indicative
HE001445	17	63	Helix	melanostoma	Korábek O.	2015	mtDNA&origin	Tunisia: El Krieb (Al Karib?)	36.32°N 9.13°E	NHMC			KF114849						Psonis et al. 2015	geographic coordinates only indicative
HE001446	14	48	Helix	cincta	Korábek O.	2015	mtDNA&origin	Greece: East Aegean: Fournoi Island	37.59°N 26.51°E	NHMC			KF114819						Psonis et al. 2015	accuracy of the sequence is doubtful (see text for explanation)
HE001447	14	48	Helix	cincta	Korábek O.	2015	mtDNA&origin	Greece: East Aegean: Ikaria Island	37.61°N 26.21°E	NHMC			KF114821						Psonis et al. 2015	geographic coordinates only indicative, accuracy of the sequence is doubtful (see text for explanation) ; COI KF114811 deleted
HE001448	14	48	Helix	cincta	Korábek O.	2015	mtDNA&origin	Greece: East Aegean: Alatsonisi Islet	37.532°N 26.416°E	NHMC			KF114822						Psonis et al. 2015	no COI in GenBank, in paper stated KF114813 which is annotated with another locality; geographic coordinates only indicative, accuracy of the sequence is doubtful (see text for explanation)
HE001449	16	61	Helix	pronuba	Korábek O.	2015	mtDNA&origin	Greece: south-central Crete: Lentas	34.93°N 24.92°E	NHMC			KF114828						Psonis et al. 2015	geographic coordinates only indicative
HE001450	16	61	Helix	pronuba	Korábek O.	2015	mtDNA&origin	Greece: west Crete: Chrysoskalitissa	35.31°N 23.53°E	NHMC			KF114829						Psonis et al. 2015	geographic coordinates only indicative
HE001451	16	61	Helix	pronuba	Korábek O.	2015	mtDNA&origin	Greece: west Crete: Pervolia (specific position unknown)	35.33°N 23.55°E	NHMC			KF114831						Psonis et al. 2015	geographic coordinates only indicative
HE001452	20	69	Helix	borealis	Korábek O.	2015	mtDNA&origin	Greece: Crete: Lefka Ori mt., 800 m a.s.l., ascending from Anopoli, pinewood	35.24°N 24.09°E	NHMC	50.5604	BR23B	KF114824	KF114812					Psonis et al. 2015	geographic coordinates only indicative; only a short (Hel-inter primer pair) 16S was obtained from the specimen, which has been sampled for analysis previously; as the BR23B sequence was identical with KF114824 it is assumed that it refers to the same individual as analysed by Psonis et al. 2015
HE001453	55	205	Caucasotachea	vindobonensis	Korábek O.	2020	shell	Hungary: Jasz-Nagykun-Szolnok County: Nagyrév	46.934°N 20.190°E	Centre for Biodiversity Genomics	BIOUG37881-H10								Layton et al. 2019	BOLD: FTMWO226-18
HE001454	14	48	Helix	cincta	Korábek O.	2015	mtDNA&origin	Greece: East Aegean: Samos island	37.72°N 27.05°E	NHMC			KF114839						Psonis et al. 2015	geographic coordinates only indicative
HE001455	19	66	Helix	borealis	Korábek O.	2015	mtDNA&origin	Greece: West Peloponnisos: Skollis mountain	37.96°N 21.57°E	NHMC			KF114840						Psonis et al. 2015	geographic coordinates only indicative
HE001456	33	126	Helix	figulina	authors			Greece: East Aegean: Chios, Karfas	38.32°N 26.15°E	NHMC			KF114841	KF114817					Psonis et al. 2015	geographic coordinates only indicative; accuracy of the sequence is doubtful (see text for explanation)
HE001457	33	126	Helix	figulina	authors			Greece: East Aegean: Chios, Karfas	38.32°N 26.15°E	NHMC			KF114842	KF114818					Psonis et al. 2015	geographic coordinates only indicative, accuracy of the sequence is doubtful (see text for explanation)
HE001458	31	117	Helix	godetiana	authors			Greece: Dodecanese: Astypalea island	36.58°N 26.38°E	NHMC			KF114847						Psonis et al. 2015	geographic coordinates only indicative
HE001459	31	117	Helix	godetiana	authors			Greece: Dodecanese: Kounoupoi islet	36.536°N 26.468°E	NHMC			KF114848						Psonis et al. 2015	geographic coordinates only indicative
HE001460	31	117	Helix	godetiana	authors			Greece: Dodecanese: Pontikousa Islet	36.555°N 26.227°E	NHMC			KF114846						Psonis et al. 2015	geographic coordinates only indicative
HE001461	55	203	Caucasotachea	vindobonensis	Korábek O.	2020	shell	Hungary: Jasz-Nagykun-Szolnok County: Nagyrév	46.934°N 20.190°E	Centre for Biodiversity Genomics	BIOUG37881-H11								Layton et al. 2019	BOLD: FTMWO227-18
HE001463	14	49	Helix	valentini	Korábek O.	2015	mtDNA	Greece: Dodecanese: Telendos islet	37.0°N 26.9°E	NHMC			KF114845						Psonis et al. 2015	geographic coordinates only indicative, accuracy of the sequence is doubtful (see text for explanation)
HE001464	52	198	Codringtonia	codringtonii	authors			Greece: Peloponnese: Chrysokelaria Monastery	36.7915°N 21.8856°E			CcHr1	JQ240089	JQ239920					Kotsakiozi et al. 2012
HE001465	52	197	Codringtonia	codringtonii	authors			Greece: Peloponnese: Mathias	36.9293°N 21.8834°E			CcMath1	JQ240090	JQ239921	JQ240006				Kotsakiozi et al. 2012
HE001466	52	197	Codringtonia	codringtonii	authors			Greece: Peloponnese: Navarino	36.9524°N 21.6614°E			CcNav1a	JQ240091	JQ239922					Kotsakiozi et al. 2012
HE001467	52	197	Codringtonia	codringtonii	authors			Greece: Peloponnese: Navarino	36.9524°N 21.6614°E			CcNav2	JQ240092	JQ239923	JQ240007				Kotsakiozi et al. 2012
HE001468	52	197	Codringtonia	codringtonii	authors			Greece: Peloponnese: Rodia 1.2 km before	37.2126°N 21.7383°E			CcRod1	JQ240093	JQ239924	JQ240008				Kotsakiozi et al. 2012
HE001469	52	197	Codringtonia	codringtonii	authors			Greece: Peloponnese: Rodia 1.2 km before	37.2126°N 21.7383°E			CcRod2	JQ240094	JQ239925	JQ240009				Kotsakiozi et al. 2012
HE001470	52	197	Codringtonia	codringtonii	authors			Greece: Peloponnese: Rodia 1.2 km before	37.2126°N 21.7383°E			CcRod3	JQ240095	JQ239926	JQ240010				Kotsakiozi et al. 2012
HE001471	52	197	Codringtonia	codringtonii	authors			Greece: Peloponnese: Rodia 1.2 km before	37.2126°N 21.7383°E			CcRod4	JQ240096	JQ239927	JQ240011				Kotsakiozi et al. 2012
HE001472	52	181	Codringtonia	elisabethae	authors			Greece: Peloponnese: Achladokampos to Argos 5 km	37.5178°N 22.6634°E			CeAA7_1	JQ240097	JQ239928	JQ240012				Kotsakiozi et al. 2012
HE001473	52	181	Codringtonia	elisabethae	authors			Greece: Peloponnese: Steno to Tripoli 500m	37.5001°N 22.4622°E			CeST6_1	JQ240098	JQ239929					Kotsakiozi et al. 2012
HE001474	52	181	Codringtonia	elisabethae	authors			Greece: Peloponnese: Steno to Tripoli 500m	37.5001°N 22.4622°E			CeST6_2	JQ240099	JQ239930	JQ240014				Kotsakiozi et al. 2012
HE001475	52	181	Codringtonia	elisabethae	authors			Greece: Peloponnese: Steno to Tripoli 500m	37.5001°N 22.4622°E			CeST6_3	JQ240100	JQ239931	JQ240015				Kotsakiozi et al. 2012
HE001476	52	181	Codringtonia	elisabethae	authors			Greece: Peloponnese: Steno to Tripoli 500m	37.5001°N 22.4622°E			CeST6_4	JQ240101	JQ239932	JQ240016				Kotsakiozi et al. 2012
HE001477	52	181	Codringtonia	elisabethae	authors			Greece: Peloponnese: Steno to Tripoli 500m	37.5001°N 22.4622°E			CeST6_5	JQ240102	JQ239933	JQ240017				Kotsakiozi et al. 2012
HE001478	52	191	Codringtonia	eucineta	authors			Greece: Peloponnese: Kalavrita to Lagovouni 6 km	38.0173°N 22.0751°E			Ceu_LAG_2	JQ240103	JQ239934	JQ240018				Kotsakiozi et al. 2012
HE001479	52	189	Codringtonia	eucineta	authors			Greece: Peloponnese: Mistras	37.06°N 22.38°E			CeuMist1	JQ240104	JQ239939	JQ240019				Kotsakiozi et al. 2012	geographic coordinates only indicative; original GPS coordinates clearly incorrect as verified at the site (a camping site)
HE001480	52	189	Codringtonia	eucineta	authors			Greece: Peloponnese: Mistras	37.06°N 22.38°E			CeuMist2	JQ240105	JQ239940	JQ240020				Kotsakiozi et al. 2012	geographic coordinates only indicative; original GPS coordinates clearly incorrect as verified at the site (a camping site)
HE001481	52	194	Codringtonia	eucineta	authors			Greece: Peloponnese: Panachaiko Mt., 1800m a.s.l.	38.2133°N 21.8747°E			Ceu_PAN_1	JQ240106	JQ239935	JQ240021				Kotsakiozi et al. 2012
HE001482	52	194	Codringtonia	eucineta	authors			Greece: Peloponnese: Panachaiko Mt., 1800m a.s.l.	38.2133°N 21.8747°E			Ceu_PAN_2	JQ240107	JQ239936	JQ240022				Kotsakiozi et al. 2012
HE001483	52	194	Codringtonia	eucineta	authors			Greece: Peloponnese: Panachaiko Mt., 1800m a.s.l.	38.2133°N 21.8747°E			Ceu_PAN_3	JQ240108	JQ239937	JQ240023				Kotsakiozi et al. 2012
HE001484	52	194	Codringtonia	eucineta	authors			Greece: Peloponnese: Panachaiko Mt., 1800m a.s.l.	38.2133°N 21.8747°E			Ceu_PAN_4	JQ240109	JQ239938	JQ240024				Kotsakiozi et al. 2012
HE001485	52	181	Codringtonia	elisabethae	Korábek O.	2020	origin&mtDNA	Greece: Peloponnese: Agios Ioannis to Meligou 1.5 km before	37.3529°N 22.6548°E			Cg_MelR1_1	JQ240110	JQ239941	JQ240025				Kotsakiozi et al. 2012	C. gittenbergeri sensu authors
HE001486	52	181	Codringtonia	elisabethae	Korábek O.	2020	origin&mtDNA	Greece: Peloponnese: Agios Ioannis to Meligou 1.5 km before	37.3529°N 22.6548°E			Cg_MelR2_1	JQ240111	JQ239942	JQ240026				Kotsakiozi et al. 2012	C. gittenbergeri sensu authors
HE001487	52	181	Codringtonia	elisabethae	Korábek O.	2020	origin&mtDNA	Greece: Peloponnese: Agios Ioannis to Meligou 1.5 km before	37.3529°N 22.6548°E			Cg_MelR3_1	JQ240112	JQ239943	JQ240027				Kotsakiozi et al. 2012	C. gittenbergeri sensu authors
HE001488	52	181	Codringtonia	elisabethae	Korábek O.	2020	origin&mtDNA	Greece: Peloponnese: Agios Ioannis to Meligou 1.5 km before	37.3529°N 22.6548°E			Cg_MelR4_1	JQ240113	JQ239944	JQ240028				Kotsakiozi et al. 2012	C. gittenbergeri sensu authors
HE001489	52	181	Codringtonia	elisabethae	Korábek O.	2020	origin&mtDNA	Greece: Peloponnese: Agios Ioannis to Meligou 1.5 km before	37.3529°N 22.6548°E			Cg_MelR4_2	JQ240114	JQ239945	JQ240029				Kotsakiozi et al. 2012	C. gittenbergeri sensu authors
HE001490	52	181	Codringtonia	elisabethae	Korábek O.	2020	origin&mtDNA	Greece: Peloponnese: Agios Ioannis to Meligou 1.5 km before	37.3529°N 22.6548°E			Cg_MelR5_1	JQ240115	JQ239946	JQ240030				Kotsakiozi et al. 2012	C. gittenbergeri sensu authors
HE001491	52	181	Codringtonia	elisabethae	Korábek O.	2020	origin&mtDNA	Greece: Peloponnese: Agios Ioannis to Meligou 1.5 km before	37.3529°N 22.6548°E			Cg_MelR5_2	JQ240116	JQ239947	JQ240031				Kotsakiozi et al. 2012	C. gittenbergeri sensu authors
HE001492	52	181	Codringtonia	elisabethae	Korábek O.	2020	origin&mtDNA	Greece: Peloponnese: Agios Ioannis to Meligou 1.5 km before	37.3529°N 22.6548°E			Cg_MelR6_2	JQ240117	JQ239949	JQ240033				Kotsakiozi et al. 2012	C. gittenbergeri sensu authors
HE001493	52	181	Codringtonia	elisabethae	Korábek O.	2020	origin&mtDNA	Greece: Peloponnese: Agios Ioannis to Meligou 1.5 km before	37.3529°N 22.6548°E			Cg_MelR7_1	JQ240118	JQ239950	JQ240034				Kotsakiozi et al. 2012	C. gittenbergeri sensu authors
HE001494	52	181	Codringtonia	elisabethae	Korábek O.	2020	origin&mtDNA	Greece: Peloponnese: Agios Ioannis to Meligou 1.5 km before	37.3529°N 22.6548°E			Cg_MelR7_2	JQ240119	JQ239951	JQ240035				Kotsakiozi et al. 2012	C. gittenbergeri sensu authors
HE001495	52	181	Codringtonia	elisabethae	Korábek O.	2020	origin&mtDNA	Greece: Peloponnese: Agios Ioannis to Meligou 1.5 km before	37.3529°N 22.6548°E			Cg_MelR7_3	JQ240120	JQ239952					Kotsakiozi et al. 2012	C. gittenbergeri sensu authors
HE001496	52	181	Codringtonia	elisabethae	Korábek O.	2020	origin&mtDNA	Greece: Peloponnese: Agios Ioannis to Meligou 1.5 km before	37.3529°N 22.6548°E			Cg_MelR7_4	JQ240121	JQ239953	JQ240037				Kotsakiozi et al. 2012	C. gittenbergeri sensu authors
HE001497	52	197	Codringtonia	codringtonii	authors			Greece: Peloponnese: Agios Petros to Malevi Monastery	37.33°N 22.56°E			Ccc_Mal_1	JQ240122	JQ239954	JQ240038				Kotsakiozi et al. 2012	geographic coordinates only indicative; the coordinates given by authors point to a site several km S of Agios, these are placed on the road to the monastery
HE001498	52	197	Codringtonia	codringtonii	authors			Greece: Peloponnese: Kalithea	37.0861°N 22.6411°E			Cc_KalR2_2	JQ240123	JQ239955	JQ240039				Kotsakiozi et al. 2012
HE001499	52	184	Codringtonia	intusplicata	authors			Greece: Peloponnese: Mainalo mountain hut	37.6565°N 22.2623°E			Ci_MEN_1	JQ240124	JQ239956	JQ240040				Kotsakiozi et al. 2012
HE001500	52	184	Codringtonia	intusplicata	authors			Greece: Peloponnese: Mainalo mountain hut	37.6565°N 22.2623°E			Ci_MEN_2	JQ240125	JQ239957	JQ240041				Kotsakiozi et al. 2012
HE001501	52	182	Codringtonia	helenae	authors			Greece: Peloponnese: Mainalo mountain hut	37.6565°N 22.2623°E			Ch_MEN_3	JQ240126	JQ239958	JQ240042				Kotsakiozi et al. 2012
HE001502	52	182	Codringtonia	helenae	authors			Greece: Peloponnese: Mainalo mountain hut	37.6565°N 22.2623°E			Ch_MEN_4	JQ240127	JQ239959	JQ240043				Kotsakiozi et al. 2012
HE001503	52	182	Codringtonia	helenae	authors			Greece: Peloponnese: Mainalo mountain hut	37.6565°N 22.2623°E			Ch_MEN_5	JQ240128	JQ239960	JQ240044				Kotsakiozi et al. 2012
HE001504	52	182	Codringtonia	helenae	authors			Greece: Peloponnese: Mainalo mountain hut	37.6565°N 22.2623°E			Ch_MEN_6	JQ240129	JQ239961	JQ240045				Kotsakiozi et al. 2012
HE001505	52	182	Codringtonia	helenae	authors			Greece: Peloponnese: Mainalo mountain hut	37.6565°N 22.2623°E			Ch_MEN_8	JQ240130	JQ239962	JQ240046				Kotsakiozi et al. 2012
HE001506	52	182	Codringtonia	helenae	authors			Greece: Peloponnese: Mainalo mountain hut	37.6565°N 22.2623°E			Ch_MEN_9	JQ240131	JQ239963	JQ240047				Kotsakiozi et al. 2012
HE001507	52	182	Codringtonia	helenae	authors			Greece: Peloponnese: Mainalo mountain hut	37.6565°N 22.2623°E			Ch_MEN_10	JQ240132	JQ239964	JQ240048				Kotsakiozi et al. 2012
HE001508	52	182	Codringtonia	helenae	authors			Greece: Peloponnese: Mainalo mountain hut	37.6565°N 22.2623°E			Ch_MEN_11	JQ240133	JQ239965	JQ240049				Kotsakiozi et al. 2012
HE001509	52	184	Codringtonia	intusplicata	authors			Greece: Peloponnese: Mainalo mountain hut	37.6565°N 22.2623°E			Ci_MEN_12	JQ240134	JQ239967	JQ240050				Kotsakiozi et al. 2012
HE001510	52	182	Codringtonia	helenae	authors			Greece: Peloponnese: Mainalo mountain hut	37.6565°N 22.2623°E			Ch_MEN_13	JQ240135	JQ239966	JQ240051				Kotsakiozi et al. 2012
HE001511	52	182	Codringtonia	helenae	authors			Greece: Peloponnese: Mainalo mountain hut	37.6565°N 22.2623°E			Ch_MEN_14	JQ240136	JQ239968	JQ240052				Kotsakiozi et al. 2012
HE001512	52	182	Codringtonia	helenae	authors			Greece: Peloponnese: Tripoli to Levidi 2 km	37.6647°N 22.3029°E			Ch_LEV_1	JQ240137	JQ239969	JQ240053				Kotsakiozi et al. 2012
HE001513	52	182	Codringtonia	helenae	authors			Greece: Peloponnese: Tripoli to Levidi 2 km	37.6647°N 22.3029°E			Ch_LEV_2	JQ240138	JQ239970	JQ240054				Kotsakiozi et al. 2012
HE001514	52	182	Codringtonia	helenae	authors			Greece: Peloponnese: Tripoli to Levidi 2 km	37.6647°N 22.3029°E			Ch_LEV_3	JQ240139	JQ239971	JQ240055				Kotsakiozi et al. 2012
HE001515	52	182	Codringtonia	helenae	authors			Greece: Peloponnese: Tripoli to Levidi 2 km	37.6647°N 22.3029°E			Ch_LEV_4	JQ240140	JQ239972	JQ240056				Kotsakiozi et al. 2012
HE001516	52	182	Codringtonia	helenae	authors			Greece: Peloponnese: Tripoli to Levidi 2 km	37.6647°N 22.3029°E			Ch_LEV_5	JQ240141	JQ239973	JQ240057				Kotsakiozi et al. 2012
HE001517	52	182	Codringtonia	helenae	authors			Greece: Peloponnese: Tripoli to Mainalo mountain hut 1.5 km	37.5200°N 22.3568°E			ChTM4_1	JQ240142	JQ239974	JQ240058				Kotsakiozi et al. 2012
HE001518	52	182	Codringtonia	helenae	authors			Greece: Peloponnese: Tripoli to Mainalo mountain hut 1.5 km	37.5200°N 22.3568°E			ChTM4_2	JQ240143	JQ239975	JQ240059				Kotsakiozi et al. 2012
HE001519	52	182	Codringtonia	helenae	authors			Greece: Peloponnese: Tripoli to Mainalo mountain hut 1.5 km	37.5200°N 22.3568°E			ChTM4_3	JQ240144	JQ239976	JQ240060				Kotsakiozi et al. 2012
HE001520	52	182	Codringtonia	helenae	authors			Greece: Peloponnese: Tripoli to Mainalo mountain hut 4 km	37.5357°N 22.3458°E			ChTM5_1	JQ240145	JQ239977	JQ240061				Kotsakiozi et al. 2012
HE001521	52	183	Codringtonia	intusplicata	authors			Greece: Peloponnese: Diakopto	38.1805°N 22.1944°E			Ci_DIA_1	JQ240146	JQ239978					Kotsakiozi et al. 2012
HE001522	52	183	Codringtonia	intusplicata	authors			Greece: Peloponnese: Diakopto	38.1805°N 22.1944°E			Ci_DIA_2	JQ240147	JQ239979	JQ240063				Kotsakiozi et al. 2012
HE001523	52	183	Codringtonia	intusplicata	authors			Greece: Peloponnese: Diakopto to Kalavrita	38.0995°N 22.1705°E			Ci_MSP_1	JQ240148	JQ239980	JQ240064				Kotsakiozi et al. 2012
HE001524	52	183	Codringtonia	intusplicata	authors			Greece: Peloponnese: Diakopto to Kalavrita	38.0995°N 22.1705°E			Ci_MSP_2	JQ240149	JQ239981	JQ240065				Kotsakiozi et al. 2012
HE001525	52	183	Codringtonia	intusplicata	authors			Greece: Peloponnese: Diakopto to Kalavrita	38.0995°N 22.1705°E			Ci_MSP_3	JQ240150	JQ239982	JQ240066				Kotsakiozi et al. 2012
HE001526	52	183	Codringtonia	intusplicata	authors			Greece: Peloponnese: Planitero, Helmos Mt.	37.9338°N 22.1649°E			CiPLAN1	JQ240151	JQ239983	JQ240067				Kotsakiozi et al. 2012
HE001527	52	183	Codringtonia	intusplicata	authors			Greece: Peloponnese: Planitero, Helmos Mt.	37.9338°N 22.1649°E			CiPLAN2	JQ240152	JQ239984	JQ240068				Kotsakiozi et al. 2012
HE001528	52	183	Codringtonia	intusplicata	authors			Greece: Peloponnese: Planitero, Helmos Mt.	37.9338°N 22.1649°E			CiPLAN3	JQ240153	JQ239985					Kotsakiozi et al. 2012
HE001529	58	219	Neocrassa	neocrassa	authors			Greece: Epirus: Vrosina to Igoumenitsa 15 km	39.5871°N 20.4762°E			Cn_IG_1	JQ240154	JQ239986	JQ240070				Kotsakiozi et al. 2012
HE001530	58	219	Neocrassa	neocrassa	authors			Greece: Epirus: Vrosina to Igoumenitsa 15 km	39.5871°N 20.4762°E			Cn_IG_2	JQ240155	JQ239987					Kotsakiozi et al. 2012
HE001531	58	219	Neocrassa	neocrassa	authors			Greece: Epirus: Vrosina to Igoumenitsa 15 km	39.5871°N 20.4762°E			Cn_IG_3	JQ240156	JQ239988	JQ240072				Kotsakiozi et al. 2012
HE001532	51	177	Codringtonia	parnassia	authors			Greece: Central Greece: Giona Mt.-Palaiovouni peak at Makrilakoma	38.6292°N 22.2198°E			CpGio_1	JQ240157	JQ239989	JQ240073				Kotsakiozi et al. 2012
HE001533	51	177	Codringtonia	parnassia	authors			Greece: Central Greece: Giona Mt.-Palaiovouni peak at Makrilakoma	38.6292°N 22.2198°E			CpGio_2	JQ240158	JQ239990	JQ240074				Kotsakiozi et al. 2012
HE001534	51	177	Codringtonia	parnassia	authors			Greece: Central Greece: Giona Mt.-Palaiovouni peak at Makrilakoma	38.6292°N 22.2198°E			CpGio_3	JQ240159	JQ239991	JQ240075				Kotsakiozi et al. 2012
HE001535	51	177	Codringtonia	parnassia	authors			Greece: Central Greece: Gravia to Amfissa 27.5 km	38.6492°N 22.4154°E			CpGravR1	JQ240160	JQ239992	JQ240076				Kotsakiozi et al. 2012
HE001536	51	177	Codringtonia	parnassia	authors			Greece: Central Greece: Gravia to Amfissa 27.5 km	38.6492°N 22.4154°E			CpGravR2	JQ240161	JQ239993	JQ240077				Kotsakiozi et al. 2012
HE001537	51	177	Codringtonia	parnassia	authors			Greece: Central Greece: Gravia to Amfissa 27.5 km	38.6492°N 22.4154°E			CpGravR3	JQ240162	JQ239994	JQ240078				Kotsakiozi et al. 2012
HE001538	51	177	Codringtonia	parnassia	authors			Greece: Central Greece: Gravia to Amfissa 27.5 km	38.6492°N 22.4154°E			CpGravR4	JQ240163	JQ239995	JQ240079				Kotsakiozi et al. 2012
HE001539	51	177	Codringtonia	parnassia	authors			Greece: Central Greece: Gravia to Amfissa 27.5 km	38.6492°N 22.4154°E			CpGravR5_1	JQ240164	JQ239996	JQ240080				Kotsakiozi et al. 2012
HE001540	51	177	Codringtonia	parnassia	authors			Greece: Central Greece: Gravia to Amfissa 27.5 km	38.6492°N 22.4154°E			CpGravR5_2	JQ240165	JQ239997	JQ240081				Kotsakiozi et al. 2012
HE001541	51	177	Codringtonia	parnassia	authors			Greece: Central Greece: Gravia to Amfissa 27.5 km	38.6492°N 22.4154°E			CpGravR6_1	JQ240166	JQ239998	JQ240082				Kotsakiozi et al. 2012
HE001542	51	177	Codringtonia	parnassia	authors			Greece: Central Greece: Gravia to Amfissa 27.5 km	38.6492°N 22.4154°E			CpGravR6_2	JQ240167	JQ239999	JQ240083				Kotsakiozi et al. 2012
HE001543	51	177	Codringtonia	parnassia	authors			Greece: Central Greece: Gravia to Amfissa 27.5 km	38.6492°N 22.4154°E			CpGravR7	JQ240168	JQ240000	JQ240084				Kotsakiozi et al. 2012
HE001544	51	180	Codringtonia	parnassia	authors			Greece: Central Greece: Skamnos, 1.2 km to the east on the road from Bralos to Thermopiles	38.7529°N 22.4533°E			CpSka_1	JQ240169	JQ240001	JQ240085				Kotsakiozi et al. 2012
HE001545	51	180	Codringtonia	parnassia	authors			Greece: Central Greece: Thermopiles to Anavra (5 km)	38.7849°N 22.5825°E			CpThe_1	JQ240170	JQ240002	JQ240086				Kotsakiozi et al. 2012
HE001546	42	148	Levantina	spiriplana	Korábek O.	2020	mtDNA&origin	Greece: Chalki island: Profitis Ilias plateau 450m a.s.l.	36.2277°N 27.5982°E			Levantina_spiriplana	JQ240171	JQ240003	JQ240087				Kotsakiozi et al. 2012	subsp. caesareana
HE001547	42	158	Levantina	naegelei	authors			Turkey: Adana Prov.: Kozani fortress, 400m a.s.l.	37.4431°N 35.8090°E			Assyriella_naegelei	JQ240172	JQ240004	JQ240088				Kotsakiozi et al. 2012
HE001548	14	48	Helix	cincta	authors			Italy: Veneto: Padua Prov.: Arqua Petrarca, Arquà Terme, crossroad of Via Costa and Via degli Ulivi	45.2707°N 11.7230°E	Folco Giusti collection, University of Siena	38817	ARQ2	KT806370	KT806366					Giusti et al. 2015	geographic coordinates only indicative
HE001549	14	48	Helix	cincta	authors			Italy: Veneto: Padua Prov.: Arqua Petrarca, Arquà Terme, crossroad of Via Costa and Via degli Ulivi	45.2707°N 11.7230°E	Folco Giusti collection, University of Siena	38817	ARQ3	KT806371	KT806367					Giusti et al. 2015	geographic coordinates only indicative
HE001550	14	48	Helix	cincta	authors			Italy: Veneto: Padua Prov.: Arqua Petrarca, Arquà Terme, crossroad of Via Costa and Via degli Ulivi	45.2707°N 11.7230°E	Folco Giusti collection, University of Siena	38817	ARQ4	KT806372	KT806368					Giusti et al. 2015	geographic coordinates only indicative
HE001551	14	48	Helix	cincta	authors			Italy: Veneto: Padua Prov.: Arqua Petrarca, Arquà Terme, crossroad of Via Costa and Via degli Ulivi	45.2707°N 11.7230°E	Folco Giusti collection, University of Siena	38817	ARQ5	KT806373	KT806369					Giusti et al. 2015	geographic coordinates only indicative
HE001552	22	80	Helix	ligata	authors			Italy: Calabria: Cosenza: Longobucco, Filigieno	39.4629°N 16.6327°E	Folco Giusti collection, University of Siena	36610	FIL1	KU869977						Fiorentino et al. 2016	GPS provided by A. Hallgass, H. calabrica sensu authors
HE001553	22	80	Helix	ligata	authors			Italy: Calabria: Cosenza: Longobucco, Filigieno	39.4629°N 16.6327°E	Folco Giusti collection, University of Siena	36610	FIL2	KU869978	KU869783					Fiorentino et al. 2016	GPS provided by A. Hallgass, H. calabrica sensu authors
HE001554	22	80	Helix	ligata	authors			Italy: Calabria: Cosenza: Longobucco, Filigieno	39.4629°N 16.6327°E	Folco Giusti collection, University of Siena	36610	FIL3	KU869979	KU869784					Fiorentino et al. 2016	GPS provided by A. Hallgass, H. calabrica sensu authors
HE001555	22	80	Helix	ligata	authors			Italy: Calabria: Cosenza: Longobucco, Filigieno	39.4629°N 16.6327°E	Folco Giusti collection, University of Siena	36610	FIL4	KU869980						Fiorentino et al. 2016	GPS provided by A. Hallgass, H. calabrica sensu authors
HE001556	22	80	Helix	ligata	authors			Italy: Calabria: Cosenza: Longobucco, Filigieno	39.4629°N 16.6327°E	Folco Giusti collection, University of Siena	36610	FIL5	KU869981	KU869786					Fiorentino et al. 2016	GPS provided by A. Hallgass, H. calabrica sensu authors
HE001557	22	80	Helix	ligata	authors			Italy: Calabria: Cosenza: Longobucco, Filigieno	39.4629°N 16.6327°E	Folco Giusti collection, University of Siena	36610	FIL6	KU869982						Fiorentino et al. 2016	GPS provided by A. Hallgass, H. calabrica sensu authors
HE001558	22	81	Helix	ligata	authors			Italy: Calabria: Cosenza: San Pietro in Guarano env., Torrente Ferroleto	39.3739°N 16.3831°E	Folco Giusti collection, University of Siena	36610	FER1	KU869983	KU869787					Fiorentino et al. 2016	GPS provided by A. Hallgass, H. calabrica sensu authors
HE001559	22	81	Helix	ligata	authors			Italy: Calabria: Cosenza: San Pietro in Guarano env., Torrente Ferroleto	39.3739°N 16.3831°E	Folco Giusti collection, University of Siena	36610	FER3	KU869985						Fiorentino et al. 2016	GPS provided by A. Hallgass, H. calabrica sensu authors
HE001560	22	81	Helix	ligata	authors			Italy: Calabria: Cosenza: San Pietro in Guarano env., Torrente Ferroleto	39.3739°N 16.3831°E	Folco Giusti collection, University of Siena	36610	FER4	KU869986	KU869789					Fiorentino et al. 2016	GPS provided by A. Hallgass, H. calabrica sensu authors
HE001561	22	81	Helix	ligata	authors			Italy: Calabria: Cosenza: San Pietro in Guarano env., Torrente Ferroleto	39.3739°N 16.3831°E	Folco Giusti collection, University of Siena	36610	FER5	KU869987	KU869790					Fiorentino et al. 2016	GPS provided by A. Hallgass, H. calabrica sensu authors
HE001562	23	88	Helix	ceratina	authors			breeding stock, from France: Corsica: Ajaccio, Campo dell'Oro	41.92°N 8.79°E	Folco Giusti collection, University of Siena	36626	COR1	KU870093						Fiorentino et al. 2016	geographic coordinates only indicative, points to the only place the snails for breeding could have been collected
HE001563	23	88	Helix	ceratina	authors			breeding stock, from France: Corsica: Ajaccio, Campo dell'Oro	41.92°N 8.79°E	Folco Giusti collection, University of Siena	36626	COR2	KU870092						Fiorentino et al. 2016	geographic coordinates only indicative, points to the only place the snails for breeding could have been collected
HE001564	23	88	Helix	ceratina	authors			breeding stock, from France: Corsica: Ajaccio, Campo dell'Oro	41.92°N 8.79°E	Folco Giusti collection, University of Siena	36626	COR3	KU870091						Fiorentino et al. 2016	geographic coordinates only indicative, points to the only place the snails for breeding could have been collected
HE001565	23	88	Helix	ceratina	authors			breeding stock, from France: Corsica: Ajaccio, Campo dell'Oro	41.92°N 8.79°E	Folco Giusti collection, University of Siena	36626	COR4	KU870094						Fiorentino et al. 2016	geographic coordinates only indicative, points to the only place the snails for breeding could have been collected
HE001566	14	48	Helix	cincta	authors			Italy: Emilia-Romagna: Rimini: San Leo	43.90°N 12.34°E	Folco Giusti collection, University of Siena	35894	SMR	KU870065	KU869901					Fiorentino et al. 2016	geographic coordinates only indicative; UTM: 33TTJ86
HE001567	22	82	Helix	ligata	authors			Italy: Basilicata: Potenza: massif of Monte Pollino, Colle del Dragone	39.9225°N 16.0811°E	Folco Giusti collection, University of Siena	36554	VZC1	KU869976	KU869809					Fiorentino et al. 2016	GPS provided by A. Hallgass, Helix gussoneana sensu authors
HE001568	22	85	Helix	ligata	authors			Italy: Basilicata: Potenza: massif of Monte Pollino, Vallone Zaperna	39.9154°N 16.1357°E	Folco Giusti collection, University of Siena	36544	VZL1		KU869807					Fiorentino et al. 2016	GPS provided by A. Hallgass, Helix gussoneana sensu authors
HE001569	22	85	Helix	ligata	authors			Italy: Basilicata: Potenza: massif of Monte Pollino, Vallone Zaperna	39.9154°N 16.1357°E	Folco Giusti collection, University of Siena	36544	VZL2		KU869808					Fiorentino et al. 2016	GPS provided by A. Hallgass, Helix gussoneana sensu authors
HE001570	22	84	Helix	ligata	authors			Italy: Campania: Beneveto?: Forchia	41.03°N 14.54°E	Folco Giusti collection, University of Siena	36098	FOR1	KU870030	KU869890					Fiorentino et al. 2016	geographic coordinates only indicative; Helix gussoneana sensu authors; UTM: 33TVF64
HE001571	22	84	Helix	ligata	authors			Italy: Campania: Beneveto?: Forchia	41.03°N 14.54°E	Folco Giusti collection, University of Siena	36098	FOR2	KU870031	KU869891					Fiorentino et al. 2016	geographic coordinates only indicative; Helix gussoneana sensu authors; UTM: 33TVF64
HE001572	22	84	Helix	ligata	authors			Italy: Campania: Beneveto?: Forchia	41.03°N 14.54°E	Folco Giusti collection, University of Siena	36098	FOR3	KU870032	KU869892					Fiorentino et al. 2016	geographic coordinates only indicative; Helix gussoneana sensu authors; UTM: 33TVF64
HE001573	22	84	Helix	ligata	authors			Italy: Campania: Beneveto?: Forchia	41.03°N 14.54°E	Folco Giusti collection, University of Siena	36098	FOR4	KU870033	KU869893					Fiorentino et al. 2016	geographic coordinates only indicative; Helix gussoneana sensu authors; UTM: 33TVF64
HE001574	22	84	Helix	ligata	authors			Italy: Campania: Beneveto?: Forchia	41.03°N 14.54°E	Folco Giusti collection, University of Siena	36098	FOR5	KU870034	KU869894					Fiorentino et al. 2016	geographic coordinates only indicative; Helix gussoneana sensu authors; UTM: 33TVF64
HE001575	22	84	Helix	ligata	authors			Italy: Campania: Beneveto?: Forchia	41.03°N 14.54°E	Folco Giusti collection, University of Siena	36098	FOR6	KU870035	KU869895					Fiorentino et al. 2016	geographic coordinates only indicative; Helix gussoneana sensu authors; UTM: 33TVF64
HE001576	22	82	Helix	ligata	authors			Italy: Campania: Salerno: Romagnano al Monte env., Gola di Romagnano, near Balvano train station	40.6528°N 15.4972°E	Folco Giusti collection, University of Siena	36557	ROM1	KU869967						Fiorentino et al. 2016	GPS provided by A. Hallgass, Helix gussoneana sensu authors
HE001577	22	82	Helix	ligata	authors			Italy: Campania: Salerno: Romagnano al Monte env., Gola di Romagnano, near Balvano train station	40.6528°N 15.4972°E	Folco Giusti collection, University of Siena	36557	ROM2	KU869965	KU869810					Fiorentino et al. 2016	GPS provided by A. Hallgass, Helix gussoneana sensu authors
HE001578	22	87	Helix	ligata	authors			Italy: Campania: Salerno: Romagnano al Monte env., Gola di Romagnano, near Balvano train station	40.6528°N 15.4972°E	Folco Giusti collection, University of Siena	36557	ROM3	KU869966						Fiorentino et al. 2016	GPS provided by A. Hallgass, Helix gussoneana sensu authors
HE001579	22	82	Helix	ligata	authors			Italy: Campania: Salerno: Romagnano al Monte env., Gola di Romagnano, near Balvano train station	40.6528°N 15.4972°E	Folco Giusti collection, University of Siena	36557	ROM4	KU869968	KU869811					Fiorentino et al. 2016	GPS provided by A. Hallgass, Helix gussoneana sensu authors
HE001580	22	87	Helix	ligata	authors			Italy: Campania: Salerno: Romagnano al Monte env., Gola di Romagnano, near Balvano train station	40.6528°N 15.4972°E	Folco Giusti collection, University of Siena	36557	ROM5	KU869969	KU869812					Fiorentino et al. 2016	GPS provided by A. Hallgass, Helix gussoneana sensu authors
HE001581	22	82	Helix	ligata	authors			Italy: Campania: Salerno: Romagnano al Monte env., Gola di Romagnano, near Balvano train station	40.6528°N 15.4972°E	Folco Giusti collection, University of Siena	36557	ROM6	KU869970	KU869813					Fiorentino et al. 2016	GPS provided by A. Hallgass, Helix gussoneana sensu authors
HE001582	22	83	Helix	ligata	authors			Italy: Campania: Avellino: Lioni, Cascata di Brovesao on the river Ofanto	40.8836°N 15.2167°E	Folco Giusti collection, University of Siena	37772	FOF1	KU869948	KU869934					Fiorentino et al. 2016	GPS provided by A. Hallgass, Helix gussoneana sensu authors
HE001583	22	84	Helix	ligata	authors			Italy: Campania: Avellino: Lioni, Cascata di Brovesao on the river Ofanto	40.8836°N 15.2167°E	Folco Giusti collection, University of Siena	37772	FOF2	KU869949	KU869935					Fiorentino et al. 2016	GPS provided by A. Hallgass, Helix gussoneana sensu authors
HE001584	22	83	Helix	ligata	authors			Italy: Campania: Avellino: Lioni, Cascata di Brovesao on the river Ofanto	40.8836°N 15.2167°E	Folco Giusti collection, University of Siena	37772	FOF3	KU869950						Fiorentino et al. 2016	GPS provided by A. Hallgass, Helix gussoneana sensu authors
HE001585	22	83	Helix	ligata	authors			Italy: Campania: Avellino: Lioni, Cascata di Brovesao on the river Ofanto	40.8836°N 15.2167°E	Folco Giusti collection, University of Siena	37772	FOF4	KU869951	KU869936					Fiorentino et al. 2016	GPS provided by A. Hallgass, Helix gussoneana sensu authors
HE001586	22	83	Helix	ligata	authors			Italy: Campania: Avellino: Lioni, Cascata di Brovesao on the river Ofanto	40.8836°N 15.2167°E	Folco Giusti collection, University of Siena	37772	FOF5	KU869952	KU869937					Fiorentino et al. 2016	GPS provided by A. Hallgass, Helix gussoneana sensu authors
HE001587	21	74	Helix	ligata	authors			Italy: Abruzzo: L’Aquila: Castrovalva, Gole del Sagittario	41.9856°N 13.8081°E	Folco Giusti collection, University of Siena	36576	CAS1	KU869955	KU869815					Fiorentino et al. 2016	GPS provided by A. Hallgass, Helix ligata sensu authors
HE001588	21	73	Helix	ligata	authors			Italy: Abruzzo: L’Aquila: Castrovalva, Gole del Sagittario	41.9856°N 13.8081°E	Folco Giusti collection, University of Siena	36576	CAS2	KU869953	KU869816					Fiorentino et al. 2016	GPS provided by A. Hallgass, Helix ligata sensu authors
HE001589	21	73	Helix	ligata	authors			Italy: Abruzzo: L’Aquila: Castrovalva, Gole del Sagittario	41.9856°N 13.8081°E	Folco Giusti collection, University of Siena	36576	CAS3	KU869954						Fiorentino et al. 2016	GPS provided by A. Hallgass, Helix ligata sensu authors
HE001590	21	74	Helix	ligata	authors			Italy: Abruzzo: Pescara: Monte Morrone	42.1156°N 13.9782°E	Folco Giusti collection, University of Siena	36587	MOR1	KU869956						Fiorentino et al. 2016	GPS provided by A. Hallgass, Helix ligata sensu authors
HE001591	21	72	Helix	ligata	authors			Italy: Abruzzo: Pescara: Monte Morrone	42.1156°N 13.9782°E	Folco Giusti collection, University of Siena	36587	MOR2	KU869957						Fiorentino et al. 2016	GPS provided by A. Hallgass, Helix ligata sensu authors
HE001592	21	73	Helix	ligata	authors			Italy: Lazio: Roma: Monti Lepini: near Carpineto Romano	41.5895°N 13.1064°E	Folco Giusti collection, University of Siena	36465	LEP1	KU869958						Fiorentino et al. 2016	GPS provided by A. Hallgass, Helix ligata sensu authors
HE001593	21	73	Helix	ligata	authors			Italy: Lazio: Roma: Monti Lepini: near Carpineto Romano	41.5895°N 13.1064°E	Folco Giusti collection, University of Siena	36465	LEP2	KU869959	KU869792					Fiorentino et al. 2016	GPS provided by A. Hallgass, Helix ligata sensu authors
HE001594	21	73	Helix	ligata	authors			Italy: Lazio: Roma: Monti Lepini: near Carpineto Romano	41.5895°N 13.1064°E	Folco Giusti collection, University of Siena	36465	LEP3	KU869960	KU869793					Fiorentino et al. 2016	GPS provided by A. Hallgass, Helix ligata sensu authors
HE001595	21	73	Helix	ligata	authors			Italy: Lazio: Roma: Monti Lepini: near Carpineto Romano	41.5895°N 13.1064°E	Folco Giusti collection, University of Siena	36465	LEP4	KU869961	KU869794					Fiorentino et al. 2016	GPS provided by A. Hallgass, Helix ligata sensu authors
HE001596	21	73	Helix	ligata	authors			Italy: Lazio: Roma: Monti Lepini: near Carpineto Romano	41.5895°N 13.1064°E	Folco Giusti collection, University of Siena	36465	LEP5	KU869962	KU869795					Fiorentino et al. 2016	GPS provided by A. Hallgass, Helix ligata sensu authors
HE001597	21	73	Helix	ligata	authors			Italy: Lazio: Roma: Monti Lepini: near Carpineto Romano	41.5895°N 13.1064°E	Folco Giusti collection, University of Siena	36465	LEP6	KU869963	KU869796					Fiorentino et al. 2016	GPS provided by A. Hallgass, Helix ligata sensu authors
HE001598	21	73	Helix	ligata	authors			Italy: Lazio: Roma: Monti Lepini: near Carpineto Romano	41.5895°N 13.1064°E	Folco Giusti collection, University of Siena	36465	LEP7	KU869964	KU869797					Fiorentino et al. 2016	GPS provided by A. Hallgass, Helix ligata sensu authors
HE001599	21	73	Helix	ligata	authors			Italy: Lazio: Rieti: Monti Reatini, Leonessa	42.55°N 12.97°E	Folco Giusti collection, University of Siena	26436	LEO1	KU870105	KU869825					Fiorentino et al. 2016	geographic coordinates only indicative; Helix ligata sensu authors; UTM: 33TUH31
HE001600	21	73	Helix	ligata	authors			Italy: Lazio: Rieti: Monti Reatini, Leonessa	42.55°N 12.97°E	Folco Giusti collection, University of Siena	26436	LEO3	KU870106	KU869827					Fiorentino et al. 2016	geographic coordinates only indicative; Helix ligata sensu authors; UTM: 33TUH31
HE001601	21	73	Helix	ligata	authors			Italy: Lazio: Rieti: Monti Reatini, Leonessa	42.55°N 12.97°E	Folco Giusti collection, University of Siena	26436	LEO4	KU870103	KU869828					Fiorentino et al. 2016	geographic coordinates only indicative; Helix ligata sensu authors; UTM: 33TUH31
HE001602	21	73	Helix	ligata	authors			Italy: Lazio: Rieti: Monti Reatini, Leonessa	42.55°N 12.97°E	Folco Giusti collection, University of Siena	26436	LEO5	KU870107	KU869829					Fiorentino et al. 2016	geographic coordinates only indicative; Helix ligata sensu authors; UTM: 33TUH31
HE001603	21	73	Helix	ligata	authors			Italy: Lazio: Rieti: Lago Scandarello, Amatrice	42.6386°N 13.2601°E	Folco Giusti collection, University of Siena	38947	AMA1	KU869938	KU869927					Fiorentino et al. 2016	GPS provided by A. Hallgass, Helix ligata sensu authors
HE001604	21	73	Helix	ligata	authors			Italy: Lazio: Rieti: Lago Scandariello, Amatrice	42.6386°N 13.2601°E	Folco Giusti collection, University of Siena	38947	AMA2	KU869939	KU869926					Fiorentino et al. 2016	GPS provided by A. Hallgass, Helix ligata sensu authors
HE001605	21	73	Helix	ligata	authors			Italy: Lazio: Rieti: Lago Scandariello, Amatrice	42.6386°N 13.2601°E	Folco Giusti collection, University of Siena	38947	AMA3	KU869940						Fiorentino et al. 2016	GPS provided by A. Hallgass, Helix ligata sensu authors
HE001606	21	73	Helix	ligata	authors			Italy: Lazio: Rieti: Lago Scandariello, Amatrice	42.6386°N 13.2601°E	Folco Giusti collection, University of Siena	38947	AMA4	KU869941	KU869928					Fiorentino et al. 2016	GPS provided by A. Hallgass, Helix ligata sensu authors
HE001607	21	73	Helix	ligata	authors			Italy: Lazio: Rieti: Lago Scandariello, Amatrice	42.6386°N 13.2601°E	Folco Giusti collection, University of Siena	38947	AMA5	KU869942	KU869929					Fiorentino et al. 2016	GPS provided by A. Hallgass, Helix ligata sensu authors
HE001608	21	73	Helix	ligata	authors			Italy: Umbria: Perugia: Gubbio	43.36°N 12.58°E	Folco Giusti collection, University of Siena	36096	GUB1	KU870042	KU869896					Fiorentino et al. 2016	geographic coordinates only indicative; Helix ligata sensu authors; UTM: 33TUJ00
HE001609	21	73	Helix	ligata	authors			Italy: Umbria: Perugia: Gubbio	43.36°N 12.58°E	Folco Giusti collection, University of Siena	36096	GUB2	KU870043	KU869897					Fiorentino et al. 2016	geographic coordinates only indicative; Helix ligata sensu authors; UTM: 33TUJ00
HE001610	21	73	Helix	ligata	authors			Italy: Umbria: Perugia: Gubbio	43.36°N 12.58°E	Folco Giusti collection, University of Siena	36096	GUB3	KU870044	KU869898					Fiorentino et al. 2016	geographic coordinates only indicative; Helix ligata sensu authors; UTM: 33TUJ00
HE001611	21	73	Helix	ligata	authors			Italy: Umbria: Perugia: Scheggia	43.40°N 12.68°E	Folco Giusti collection, University of Siena	26443	SCH1	KU870096	KU869840					Fiorentino et al. 2016	geographic coordinates only indicative; Helix ligata sensu authors; UTM: 33TUJ10
HE001612	21	73	Helix	ligata	authors			Italy: Umbria: Perugia: Scheggia	43.40°N 12.68°E	Folco Giusti collection, University of Siena	26443	SCH2	KU870097	KU869841					Fiorentino et al. 2016	geographic coordinates only indicative; Helix ligata sensu authors; UTM: 33TUJ10
HE001613	21	73	Helix	ligata	authors			Italy: Umbria: Perugia: Scheggia	43.40°N 12.68°E	Folco Giusti collection, University of Siena	26443	SCH3	KU870095	KU869842					Fiorentino et al. 2016	geographic coordinates only indicative; Helix ligata sensu authors; UTM: 33TUJ10
HE001614	24	95	Helix	lucorum	authors			Turkey: Isparta Prov.: Eğirdir	37.87°N 30.85°E	Folco Giusti collection, University of Siena	36136	TUR1	KU870082	KU869918					Fiorentino et al. 2016	geographic coordinates only indicative
HE001615	24	95	Helix	lucorum	authors			Turkey: Isparta Prov.: Eğirdir	37.87°N 30.85°E	Folco Giusti collection, University of Siena	36136	TUR2	KU870083	KU869919					Fiorentino et al. 2016	geographic coordinates only indicative
HE001616	24	95	Helix	lucorum	authors			Turkey: Isparta Prov.: Eğirdir	37.87°N 30.85°E	Folco Giusti collection, University of Siena	36136	TUR3	KU870084	KU869920					Fiorentino et al. 2016	geographic coordinates only indicative
HE001617	17	62	Helix	melanostoma	authors			Tunisia: Zaghouan env., Djebel Zaghouan	36.35°N 10.11°E	Folco Giusti collection, University of Siena	36723	ZAG1	KU869991	KU869803					Fiorentino et al. 2016	geographic coordinates only indicative; UTM: 32SPF02
HE001618	17	62	Helix	melanostoma	authors			Tunisia: Zaghouan env., Djebel Zaghouan	36.35°N 10.11°E	Folco Giusti collection, University of Siena	36723	ZAG2	KU869992	KU869804					Fiorentino et al. 2016	geographic coordinates only indicative; UTM: 32SPF02
HE001619	17	62	Helix	melanostoma	authors			Tunisia: Zaghouan env., Djebel Zaghouan	36.35°N 10.11°E	Folco Giusti collection, University of Siena	36723	ZAG3	KU869993						Fiorentino et al. 2016	geographic coordinates only indicative; UTM: 32SPF02
HE001620	21	75	Helix	ligata	authors			Italy: Molise: Campobasso: Monte Miletto	41.45°N 14.37°E	Folco Giusti collection, University of Siena	26556	MIL1	KU870099	KU869843					Fiorentino et al. 2016	geographic coordinates only indicative; Helix mileti sensu authors; UTM: 33TVF38
HE001621	21	75	Helix	ligata	authors			Italy: Molise: Campobasso: Monte Miletto	41.45°N 14.37°E	Folco Giusti collection, University of Siena	26556	MIL2	KU870101	KU869844					Fiorentino et al. 2016	geographic coordinates only indicative; Helix mileti sensu authors; UTM: 33TVF38
HE001622	21	75	Helix	ligata	authors			Italy: Molise: Campobasso: Monte Miletto	41.45°N 14.37°E	Folco Giusti collection, University of Siena	26556	MIL3	KU870100	KU869845					Fiorentino et al. 2016	geographic coordinates only indicative; Helix mileti sensu authors; UTM: 33TVF38
HE001623	21	75	Helix	ligata	authors			Italy: Molise: Campobasso: Monte Miletto	41.45°N 14.37°E	Folco Giusti collection, University of Siena	26556	MIL4	KU870102	KU869846					Fiorentino et al. 2016	geographic coordinates only indicative; Helix mileti sensu authors; UTM: 33TVF38
HE001624	21	75	Helix	ligata	authors			Italy: Molise: Campobasso: Monte Miletto	41.45°N 14.37°E	Folco Giusti collection, University of Siena	26556	MIL5	KU870098	KU869847					Fiorentino et al. 2016	geographic coordinates only indicative; Helix mileti sensu authors; UTM: 33TVF38
HE001625	21	75	Helix	ligata	authors			Italy: Campania: Caserta: Monti del Matese, “Fiume Letino” (river Lete by Letino?)	41.45°N 14.25°E	Folco Giusti collection, University of Siena	26549	LET1	KU870114	KU869831					Fiorentino et al. 2016	geographic coordinates only indicative; Helix mileti sensu authors; UTM: 33TVF38
HE001626	21	75	Helix	ligata	authors			Italy: Campania: Caserta: Monti del Matese, “Fiume Letino” (river Lete by Letino?)	41.45°N 14.25°E	Folco Giusti collection, University of Siena	26549	LET2	KU870112	KU869832					Fiorentino et al. 2016	geographic coordinates only indicative; Helix mileti sensu authors; UTM: 33TVF38
HE001627	21	75	Helix	ligata	authors			Italy: Campania: Caserta: Monti del Matese, “Fiume Letino” (river Lete by Letino?)	41.45°N 14.25°E	Folco Giusti collection, University of Siena	26549	LET3	KU870113	KU869833					Fiorentino et al. 2016	geographic coordinates only indicative; Helix mileti sensu authors; UTM: 33TVF38
HE001628	21	75	Helix	ligata	authors			Italy: Campania: Caserta: Monti del Matese, “Fiume Letino” (river Lete by Letino?)	41.45°N 14.25°E	Folco Giusti collection, University of Siena	26549	LET5	KU870115	KU869835					Fiorentino et al. 2016	geographic coordinates only indicative; Helix mileti sensu authors; UTM: 33TVF38
HE001629	11	36	Helix	pomatia	authors			Denmark: Svendborg	55.06°N 10.60°E	Folco Giusti collection, University of Siena	36358	SVE1	KU870066	KU869902					Fiorentino et al. 2016
HE001630	11	36	Helix	pomatia	authors			Denmark: Svendborg	55.06°N 10.60°E	Folco Giusti collection, University of Siena	36358	SVE2	KU870067	KU869903					Fiorentino et al. 2016
HE001631	11	36	Helix	pomatia	authors			Denmark: Svendborg	55.06°N 10.60°E	Folco Giusti collection, University of Siena	36358	SVE3	KU870068	KU869904					Fiorentino et al. 2016
HE001632	11	36	Helix	pomatia	authors			Denmark: Svendborg	55.06°N 10.60°E	Folco Giusti collection, University of Siena	36358	SVE4	KU870069	KU869905					Fiorentino et al. 2016
HE001633	11	36	Helix	pomatia	authors			Italy: Friuli-Venezia Giulia: Udine: Aquileia	45.77°N 13.37°E	Folco Giusti collection, University of Siena	38816	AQU1	KU869994						Fiorentino et al. 2016	geographic coordinates only indicative; UTM: 33TUL77
HE001634	11	36	Helix	pomatia	authors			Italy: Friuli-Venezia Giulia: Udine: Aquileia	45.77°N 13.37°E	Folco Giusti collection, University of Siena	38816	AQU2	KU869995	KU869819					Fiorentino et al. 2016	geographic coordinates only indicative; UTM: 33TUL77
HE001635	11	36	Helix	pomatia	authors			Italy: Friuli-Venezia Giulia: Udine: Aquileia	45.77°N 13.37°E	Folco Giusti collection, University of Siena	38816	AQU3	KU869996						Fiorentino et al. 2016	geographic coordinates only indicative; UTM: 33TUL77
HE001636	11	36	Helix	pomatia	authors			Italy: Friuli-Venezia Giulia: Udine: Aquileia	45.77°N 13.37°E	Folco Giusti collection, University of Siena	38816	AQU4	KU869997						Fiorentino et al. 2016	geographic coordinates only indicative; UTM: 33TUL77
HE001637	11	36	Helix	pomatia	authors			Italy: Friuli-Venezia Giulia: Udine: Aquileia	45.77°N 13.37°E	Folco Giusti collection, University of Siena	38816	AQU5	KU869998						Fiorentino et al. 2016	geographic coordinates only indicative; UTM: 33TUL77
HE001638	11	36	Helix	pomatia	authors			Italy: Friuli-Venezia Giulia: Udine: Val Uccea	46.31°N 13.39°E	Folco Giusti collection, University of Siena	36561	UCC1	KU869999						Fiorentino et al. 2016	geographic coordinates only indicative; UTM: 33TUM72
HE001639	11	36	Helix	pomatia	authors			Italy: Friuli-Venezia Giulia: Udine: Val Uccea	46.31°N 13.39°E	Folco Giusti collection, University of Siena	36561	UCC2	KU870000						Fiorentino et al. 2016	geographic coordinates only indicative; UTM: 33TUM72
HE001640	11	36	Helix	pomatia	authors			Italy: Friuli-Venezia Giulia: Udine: Val Uccea	46.31°N 13.39°E	Folco Giusti collection, University of Siena	36561	UCC3	KU870001	KU869801					Fiorentino et al. 2016	geographic coordinates only indicative; UTM: 33TUM72
HE001641	11	36	Helix	pomatia	authors			Italy: Friuli-Venezia Giulia: Udine: Val Uccea	46.31°N 13.39°E	Folco Giusti collection, University of Siena	36561	UCC4	KU870002	KU869802					Fiorentino et al. 2016	geographic coordinates only indicative; UTM: 33TUM72
HE001642	11	41	Helix	pomatia	authors			Italy: Friuli-Venezia Giulia: Udine: Val Uccea	46.31°N 13.39°E	Folco Giusti collection, University of Siena	36561	UCC5	KU870003						Fiorentino et al. 2016	geographic coordinates only indicative; UTM: 33TUM72
HE001643	11	36	Helix	pomatia	authors			France: Piccardia: Merlieux-et-Fouquerolles	49.52°N 3.50°E	Folco Giusti collection, University of Siena	36143	AIS1	KU870011	KU869848					Fiorentino et al. 2016
HE001644	11	36	Helix	pomatia	authors			France: Piccardia: Merlieux-et-Fouquerolles	49.52°N 3.50°E	Folco Giusti collection, University of Siena	36143	AIS2	KU870012	KU869849					Fiorentino et al. 2016
HE001645	11	36	Helix	pomatia	authors			France: Piccardia: Merlieux-et-Fouquerolles	49.52°N 3.50°E	Folco Giusti collection, University of Siena	36143	AIS3	KU870013	KU869850					Fiorentino et al. 2016
HE001646	11	36	Helix	pomatia	authors			France: Piccardia: Merlieux-et-Fouquerolles	49.52°N 3.50°E	Folco Giusti collection, University of Siena	36143	AIS4	KU870014	KU869851					Fiorentino et al. 2016
HE001647	11	36	Helix	pomatia	authors			France: Piccardia: Merlieux-et-Fouquerolles	49.52°N 3.50°E	Folco Giusti collection, University of Siena	36143	AIS5	KU870015	KU869852					Fiorentino et al. 2016
HE001648	11	36	Helix	pomatia	authors			France: Piccardia: Merlieux-et-Fouquerolles	49.52°N 3.50°E	Folco Giusti collection, University of Siena	36143	AIS6	KU870016	KU869853					Fiorentino et al. 2016
HE001649	11	36	Helix	pomatia	authors			France: Piccardia: Merlieux-et-Fouquerolles	49.52°N 3.50°E	Folco Giusti collection, University of Siena	36143	AIS7	KU870017	KU869854					Fiorentino et al. 2016
HE001650	11	36	Helix	pomatia	authors			France: Auvergne-Rhône-Alpes: La-Roche-Blanche, Plateau de Gergovie	45.72°N 3.12°E	Folco Giusti collection, University of Siena	36360	PGE1	KU870053	KU869879					Fiorentino et al. 2016
HE001651	11	36	Helix	pomatia	authors			France: Auvergne-Rhône-Alpes: La-Roche-Blanche, Plateau de Gergovie	45.72°N 3.12°E	Folco Giusti collection, University of Siena	36360	PGE2	KU870054	KU869878					Fiorentino et al. 2016
HE001652	11	36	Helix	pomatia	authors			France: Auvergne-Rhône-Alpes: La-Roche-Blanche, Plateau de Gergovie	45.72°N 3.12°E	Folco Giusti collection, University of Siena	36360	PGE3	KU870055	KU869880					Fiorentino et al. 2016
HE001653	11	36	Helix	pomatia	authors			France: Auvergne-Rhône-Alpes: La-Roche-Blanche, Plateau de Gergovie	45.72°N 3.12°E	Folco Giusti collection, University of Siena	36360	PGE4	KU870056	KU869881					Fiorentino et al. 2016
HE001654	11	36	Helix	pomatia	authors			Germany: Brandenburg: Gerswalde, Pinnow	53.21°N 13.79°E	Folco Giusti collection, University of Siena	36365	GER1	KU870036	KU869866					Fiorentino et al. 2016
HE001655	11	36	Helix	pomatia	authors			Germany: Brandenburg: Gerswalde, Pinnow	53.21°N 13.79°E	Folco Giusti collection, University of Siena	36365	GER2	KU870037	KU869867					Fiorentino et al. 2016
HE001656	11	36	Helix	pomatia	authors			Germany: Brandenburg: Gerswalde, Pinnow	53.21°N 13.79°E	Folco Giusti collection, University of Siena	36365	GER3	KU870038	KU869868					Fiorentino et al. 2016
HE001657	11	36	Helix	pomatia	authors			Germany: Brandenburg: Gerswalde, Pinnow	53.21°N 13.79°E	Folco Giusti collection, University of Siena	36365	GER4	KU870039	KU869869					Fiorentino et al. 2016
HE001658	11	36	Helix	pomatia	authors			Germany: Brandenburg: Gerswalde, Pinnow	53.21°N 13.79°E	Folco Giusti collection, University of Siena	36365	GER5	KU870040	KU869870					Fiorentino et al. 2016
HE001659	11	36	Helix	pomatia	authors			Germany: Brandenburg: Gerswalde, Pinnow	53.21°N 13.79°E	Folco Giusti collection, University of Siena	36365	GER6	KU870041	KU869871					Fiorentino et al. 2016
HE001660	11	36	Helix	pomatia	authors			Italy: Piemonte: Cuneo: Borgo San Dalmazzo	44.33°N 7.48°E	Folco Giusti collection, University of Siena	36151	BSD1	KU870020	KU869856					Fiorentino et al. 2016	geographic coordinates only indicative; UTM: 32TLQ80
HE001661	11	36	Helix	pomatia	authors			Italy: Piemonte: Cuneo: Borgo San Dalmazzo	44.33°N 7.48°E	Folco Giusti collection, University of Siena	36151	BSD2	KU870021	KU869857					Fiorentino et al. 2016	geographic coordinates only indicative; UTM: 32TLQ80
HE001662	11	36	Helix	pomatia	authors			Italy: Piemonte: Cuneo: Borgo San Dalmazzo	44.33°N 7.48°E	Folco Giusti collection, University of Siena	36151	BSD3	KU870022	KU869858					Fiorentino et al. 2016	geographic coordinates only indicative; UTM: 32TLQ80
HE001663	11	36	Helix	pomatia	authors			Italy: Piemonte: Cuneo: Borgo San Dalmazzo	44.33°N 7.48°E	Folco Giusti collection, University of Siena	36151	BSD4	KU870023	KU869859					Fiorentino et al. 2016	geographic coordinates only indicative; UTM: 32TLQ80
HE001664	11	36	Helix	pomatia	authors			Italy: Piemonte: Cuneo: Borgo San Dalmazzo	44.33°N 7.48°E	Folco Giusti collection, University of Siena	36151	BSD5	KU870024	KU869860					Fiorentino et al. 2016	geographic coordinates only indicative; UTM: 32TLQ80
HE001665	11	36	Helix	pomatia	authors			Italy: Piemonte: Collina di Torino	45.1°N 7.8°E	Folco Giusti collection, University of Siena	36359	TOI1	KU870070	KU869906					Fiorentino et al. 2016	geographic coordinates only indicative; UTM: 32TMQ09
HE001666	11	36	Helix	pomatia	authors			Italy: Piemonte: Collina di Torino	45.1°N 7.8°E	Folco Giusti collection, University of Siena	36359	TOI2	KU870071	KU869907					Fiorentino et al. 2016	geographic coordinates only indicative; UTM: 32TMQ09
HE001667	11	36	Helix	pomatia	authors			Italy: Piemonte: Collina di Torino	45.1°N 7.8°E	Folco Giusti collection, University of Siena	36359	TOI3	KU870072	KU869908					Fiorentino et al. 2016	geographic coordinates only indicative; UTM: 32TMQ09
HE001668	11	36	Helix	pomatia	authors			Italy: Piemonte: Collina di Torino	45.1°N 7.8°E	Folco Giusti collection, University of Siena	36359	TOI4	KU870073	KU869909					Fiorentino et al. 2016	geographic coordinates only indicative; UTM: 32TMQ09
HE001669	11	36	Helix	pomatia	authors			Italy: Piemonte: Collina di Torino	45.1°N 7.8°E	Folco Giusti collection, University of Siena	36359	TOI5	KU870074	KU869910					Fiorentino et al. 2016	geographic coordinates only indicative; UTM: 32TMQ09
HE001670	11	36	Helix	pomatia	authors			Italy: Piemonte: Collina di Torino	45.1°N 7.8°E	Folco Giusti collection, University of Siena	36359	TOI6	KU870075	KU869911					Fiorentino et al. 2016	geographic coordinates only indicative; UTM: 32TMQ09
HE001671	11	36	Helix	pomatia	authors			Italy: Piemonte: Collina di Torino	45.1°N 7.8°E	Folco Giusti collection, University of Siena	36359	TOI7	KU870076	KU869912					Fiorentino et al. 2016	geographic coordinates only indicative; UTM: 32TMQ09
HE001672	11	36	Helix	pomatia	authors			Italy: Piemonte: Collina di Torino	45.1°N 7.8°E	Folco Giusti collection, University of Siena	36359	TOI8	KU870077	KU869913					Fiorentino et al. 2016	geographic coordinates only indicative; UTM: 32TMQ09
HE001673	11	36	Helix	pomatia	authors			Italy: Piemonte: Torino: Collina di Torino, Reaglie	45.06°N 7.74°E	Folco Giusti collection, University of Siena	36140	TOR1	KU870078	KU869914					Fiorentino et al. 2016	geographic coordinates only indicative; UTM: 32TMQ09
HE001674	11	36	Helix	pomatia	authors			Italy: Piemonte: Torino: Collina di Torino, Reaglie	45.06°N 7.74°E	Folco Giusti collection, University of Siena	36140	TOR2	KU870079	KU869915					Fiorentino et al. 2016	geographic coordinates only indicative; UTM: 32TMQ09
HE001675	11	36	Helix	pomatia	authors			Italy: Piemonte: Torino: Collina di Torino, Reaglie	45.06°N 7.74°E	Folco Giusti collection, University of Siena	36140	TOR3	KU870080	KU869916					Fiorentino et al. 2016	geographic coordinates only indicative; UTM: 32TMQ09
HE001676	11	36	Helix	pomatia	authors			Italy: Piemonte: Torino: Collina di Torino, Reaglie	45.06°N 7.74°E	Folco Giusti collection, University of Siena	36140	TOR4	KU870081	KU869917					Fiorentino et al. 2016	geographic coordinates only indicative; UTM: 32TMQ09
HE001677	11	36	Helix	pomatia	authors			Italy: Piemonte: Cuneo: Riserva naturale delle Sorgenti del Belbo	44.39°N 8.14°E	Folco Giusti collection, University of Siena	36139	MON1	KU870045	KU869872					Fiorentino et al. 2016	geographic coordinates only indicative; UTM: 32TMQ31
HE001678	11	36	Helix	pomatia	authors			Italy: Piemonte: Cuneo: Riserva naturale delle Sorgenti del Belbo	44.39°N 8.14°E	Folco Giusti collection, University of Siena	36139	MON2	KU870046	KU869873					Fiorentino et al. 2016	geographic coordinates only indicative; UTM: 32TMQ31
HE001679	11	36	Helix	pomatia	authors			Italy: Piemonte: Cuneo: Riserva naturale delle Sorgenti del Belbo	44.39°N 8.14°E	Folco Giusti collection, University of Siena	36139	MON3	KU870047	KU869874					Fiorentino et al. 2016	geographic coordinates only indicative; UTM: 32TMQ31
HE001680	11	36	Helix	pomatia	authors			Sweden: between Ystad and Nybrostrand	55.44°N 13.88°E	Folco Giusti collection, University of Siena	36364	YST1	KU870085	KU869921					Fiorentino et al. 2016
HE001681	11	36	Helix	pomatia	authors			Sweden: between Ystad and Nybrostrand	55.44°N 13.88°E	Folco Giusti collection, University of Siena	36364	YST2	KU870086	KU869922					Fiorentino et al. 2016
HE001682	11	36	Helix	pomatia	authors			Sweden: between Ystad and Nybrostrand	55.44°N 13.88°E	Folco Giusti collection, University of Siena	36364	YST3	KU870087	KU869923					Fiorentino et al. 2016
HE001683	11	36	Helix	pomatia	authors			Sweden: between Ystad and Nybrostrand	55.44°N 13.88°E	Folco Giusti collection, University of Siena	36364	YST4	KU870088	KU869924					Fiorentino et al. 2016
HE001684	11	36	Helix	pomatia	authors			Sweden: between Ystad and Nybrostrand	55.44°N 13.88°E	Folco Giusti collection, University of Siena	36364	YST5	KU870089	KU869925					Fiorentino et al. 2016
HE001685	11	36	Helix	pomatia	authors			United Kingdom: Gloucestershire: Cheltenham env., Colesbourne Park	51.82°N -2.00°E	Folco Giusti collection, University of Siena	36104	COL1	KU870025	KU869861					Fiorentino et al. 2016
HE001686	11	36	Helix	pomatia	authors			United Kingdom: Gloucestershire: Cheltenham env., Colesbourne Park	51.82°N -2.00°E	Folco Giusti collection, University of Siena	36104	COL2	KU870026	KU869862					Fiorentino et al. 2016
HE001687	11	36	Helix	pomatia	authors			United Kingdom: Gloucestershire: Cheltenham env., Colesbourne Park	51.82°N -2.00°E	Folco Giusti collection, University of Siena	36104	COL3	KU870027	KU869863					Fiorentino et al. 2016
HE001688	11	36	Helix	pomatia	authors			United Kingdom: Gloucestershire: Cheltenham env., Colesbourne Park	51.82°N -2.00°E	Folco Giusti collection, University of Siena	36104	COL4	KU870028	KU869864					Fiorentino et al. 2016
HE001689	11	36	Helix	pomatia	authors			United Kingdom: Gloucestershire: Cheltenham env., Colesbourne Park	51.82°N -2.00°E	Folco Giusti collection, University of Siena	36104	COL5	KU870029	KU869865					Fiorentino et al. 2016
HE001690	11	36	Helix	pomatia	authors			Italy: Veneto: Vicenza: Arsiero env., valley of Riofreddo	45.83°N 11.33°E	Folco Giusti collection, University of Siena	36361	RFR1	KU870057	KU869882					Fiorentino et al. 2016	geographic coordinates only indicative and too precise, the valley is >5 km long; UTM: 32TPR87
HE001691	11	36	Helix	pomatia	authors			Italy: Veneto: Vicenza: Arsiero env., valley of Riofreddo	45.83°N 11.33°E	Folco Giusti collection, University of Siena	36361	RFR2	KU870058	KU869883					Fiorentino et al. 2016	geographic coordinates only indicative and too precise, the valley is >5 km long; UTM: 32TPR87
HE001692	11	36	Helix	pomatia	authors			Italy: Veneto: Vicenza: Arsiero env., valley of Riofreddo	45.83°N 11.33°E	Folco Giusti collection, University of Siena	36361	RFR3	KU870059	KU869884					Fiorentino et al. 2016	geographic coordinates only indicative and too precise, the valley is >5 km long; UTM: 32TPR87
HE001693	11	36	Helix	pomatia	authors			Italy: Veneto: Vicenza: Arsiero env., valley of Riofreddo	45.83°N 11.33°E	Folco Giusti collection, University of Siena	36361	RFR4	KU870060	KU869885					Fiorentino et al. 2016	geographic coordinates only indicative and too precise, the valley is >5 km long; UTM: 32TPR87
HE001694	11	36	Helix	pomatia	authors			Italy: Veneto: Vicenza: Arsiero env., valley of Riofreddo	45.83°N 11.33°E	Folco Giusti collection, University of Siena	36361	RFR5	KU870061	KU869886					Fiorentino et al. 2016	geographic coordinates only indicative and too precise, the valley is >5 km long; UTM: 32TPR87
HE001695	11	36	Helix	pomatia	authors			Italy: Veneto: Vicenza: Arsiero env., valley of Riofreddo	45.83°N 11.33°E	Folco Giusti collection, University of Siena	36361	RFR6	KU870062	KU869887					Fiorentino et al. 2016	geographic coordinates only indicative and too precise, the valley is >5 km long; UTM: 32TPR87
HE001696	11	36	Helix	pomatia	authors			Italy: Veneto: Vicenza: Arsiero env., valley of Riofreddo	45.83°N 11.33°E	Folco Giusti collection, University of Siena	36361	RFR7	KU870063	KU869888					Fiorentino et al. 2016	geographic coordinates only indicative and too precise, the valley is >5 km long; UTM: 32TPR87
HE001697	11	36	Helix	pomatia	authors			Italy: Veneto: Vicenza: Arsiero env., valley of Riofreddo	45.83°N 11.33°E	Folco Giusti collection, University of Siena	36361	RFR8	KU870064	KU869889					Fiorentino et al. 2016	geographic coordinates only indicative and too precise, the valley is >5 km long; UTM: 32TPR87
HE001698	21	76	Helix	ligata	authors			Italy: Abruzzo: L’Aquila: Gran Sasso, Campo Imperatore	42.3990°N 13.7343°E	Folco Giusti collection, University of Siena	36577	CHI1	KU869988						Fiorentino et al. 2016	GPS provided by A. Hallgass, Helix pomatella sensu authors
HE001699	21	76	Helix	ligata	authors			Italy: Abruzzo: L’Aquila: Gran Sasso, Campo Imperatore	42.3990°N 13.7343°E	Folco Giusti collection, University of Siena	36577	CHI2	KU869989						Fiorentino et al. 2016	GPS provided by A. Hallgass, Helix pomatella sensu authors
HE001700	21	76	Helix	ligata	authors			Italy: Abruzzo: L’Aquila: Gran Sasso, Campo Imperatore	42.3990°N 13.7343°E	Folco Giusti collection, University of Siena	36577	CHI3	KU869990						Fiorentino et al. 2016	GPS provided by A. Hallgass, Helix pomatella sensu authors
HE001701	21	78	Helix	ligata	authors			Italy: Lazio: Rieti: Monti Reatini: peak Iaccio Crudele near Mt. Terminillo	42.480°N 13.010°E	Folco Giusti collection, University of Siena	26256	IAC5	KU870116	KU869830					Fiorentino et al. 2016	geographic coordinates only indicative; Helix pomatella sensu authors; UTM: 33TUH31
HE001702	21	76	Helix	ligata	authors			Italy: Toscana: Siena: Monte Cetona	42.93°N 11.88°E	Folco Giusti collection, University of Siena	26236	CET1	KU870090	KU869820					Fiorentino et al. 2016	geographic coordinates only indicative; Helix pomatella sensu authors; UTM: 32TQN35
HE001703	21	77	Helix	ligata	authors			Italy: Umbria: Perugia: Monte Cucco, Sigillo	43.3416°N 12.7520°E	Folco Giusti collection, University of Siena	38942	CUC1	KU869943						Fiorentino et al. 2016	GPS provided by A. Hallgass, Helix pomatella sensu authors
HE001704	21	77	Helix	ligata	authors			Italy: Umbria: Perugia: Monte Cucco, Sigillo	43.3416°N 12.7520°E	Folco Giusti collection, University of Siena	38942	CUC2	KU869944	KU869930					Fiorentino et al. 2016	GPS provided by A. Hallgass, Helix pomatella sensu authors
HE001705	21	77	Helix	ligata	authors			Italy: Umbria: Perugia: Monte Cucco, Sigillo	43.3416°N 12.7520°E	Folco Giusti collection, University of Siena	38942	CUC3	KU869945	KU869931					Fiorentino et al. 2016	GPS provided by A. Hallgass, Helix pomatella sensu authors
HE001706	21	77	Helix	ligata	authors			Italy: Umbria: Perugia: Monte Cucco, Sigillo	43.3416°N 12.7520°E	Folco Giusti collection, University of Siena	38942	CUC4	KU869946	KU869932					Fiorentino et al. 2016	GPS provided by A. Hallgass, Helix pomatella sensu authors
HE001707	21	77	Helix	ligata	authors			Italy: Umbria: Perugia: Monte Cucco, Sigillo	43.3416°N 12.7520°E	Folco Giusti collection, University of Siena	38942	CUC5	KU869947	KU869933					Fiorentino et al. 2016	GPS provided by A. Hallgass, Helix pomatella sensu authors
HE001708	21	72	Helix	ligata	authors			Italy: Marche: Ascoli Piceno: Monti Sibillini, Rifugio Zilioli	42.8174°N 13.2685°E	Folco Giusti collection, University of Siena	26261	ZIL1	KU870117						Fiorentino et al. 2016	GPS provided by A. Hallgass
HE001709	21	72	Helix	ligata	authors			Italy: Marche: Ascoli Piceno: Monti Sibillini, Rifugio Zilioli	42.8174°N 13.2685°E	Folco Giusti collection, University of Siena	26261	ZIL2	KU870110						Fiorentino et al. 2016	GPS provided by A. Hallgass
HE001710	21	72	Helix	ligata	authors			Italy: Marche: Ascoli Piceno: Monti Sibillini, Rifugio Zilioli	42.8174°N 13.2685°E	Folco Giusti collection, University of Siena	26261	ZIL3	KU870108						Fiorentino et al. 2016	GPS provided by A. Hallgass
HE001711	21	72	Helix	ligata	authors			Italy: Marche: Ascoli Piceno: Monti Sibillini, Rifugio Zilioli	42.8174°N 13.2685°E	Folco Giusti collection, University of Siena	26261	ZIL4	KU870111						Fiorentino et al. 2016	GPS provided by A. Hallgass
HE001712	21	72	Helix	ligata	authors			Italy: Marche: Ascoli Piceno: Monti Sibillini, Rifugio Zilioli	42.8174°N 13.2685°E	Folco Giusti collection, University of Siena	26261	ZIL5	KU870109						Fiorentino et al. 2016	GPS provided by A. Hallgass
HE001713	21	79	Helix	ligata	authors			Italy: Lazio: Frosinone: Monti Marsicani, Rocca Altiera	41.6971°N 13.8834°E	Folco Giusti collection, University of Siena	36606	RAL1	KU869972	KU869780					Fiorentino et al. 2016	GPS provided by A. Hallgass
HE001714	21	79	Helix	ligata	authors			Italy: Lazio: Frosinone: Monti Marsicani, Rocca Altiera	41.6971°N 13.8834°E	Folco Giusti collection, University of Siena	36606	RAL2	KU869975						Fiorentino et al. 2016	GPS provided by A. Hallgass
HE001715	21	79	Helix	ligata	authors			Italy: Lazio: Frosinone: Monti Marsicani, Rocca Altiera	41.6971°N 13.8834°E	Folco Giusti collection, University of Siena	36606	RAL3	KU869973	KU869781					Fiorentino et al. 2016	GPS provided by A. Hallgass
HE001716	21	79	Helix	ligata	authors			Italy: Lazio: Frosinone: Monti Marsicani, Rocca Altiera	41.6971°N 13.8834°E	Folco Giusti collection, University of Siena	36606	RAL4	KU869974	KU869782					Fiorentino et al. 2016	GPS provided by A. Hallgass
HE001717	4	9	Helix	straminea	authors			Italy: Toscana: Siena: Montalbuccio	43.31°N 11.29°E	Folco Giusti collection, University of Siena	36366	MOT1	KU870048	KU869875					Fiorentino et al. 2016	geographic coordinates only indicative; UTM: 32TPN89
HE001718	4	9	Helix	straminea	authors			Italy: Toscana: Siena: Montalbuccio	43.31°N 11.29°E	Folco Giusti collection, University of Siena	36366	MOT2	KU870049	KU869876					Fiorentino et al. 2016	geographic coordinates only indicative; UTM: 32TPN89
HE001719	4	9	Helix	straminea	authors			Italy: Toscana: Siena: Torrente Bozzone	43.3°N 11.4°E	Folco Giusti collection, University of Siena	36141	BOZ1	KU870018						Fiorentino et al. 2016	geographic coordinates only indicative; UTM: 32TPN99
HE001720	4	9	Helix	straminea	authors			Italy: Toscana: Siena: Torrente Bozzone	43.3°N 11.4°E	Folco Giusti collection, University of Siena	36141	BOZ2	KU870019	KU869855					Fiorentino et al. 2016	geographic coordinates only indicative; UTM: 32TPN99
HE001721	5	13	Helix	thessalica	Korábek O.	2020	shell	Czechia: Jihomoravský kraj: PP Bouchal by the road Ivančice – Nová Ves	49.1029°N 16.3428°E	no voucher		6392	MW443837	MW443946					this study
HE001722	5	13	Helix	thessalica	Korábek O.	2020	shell	Czechia: Jihomoravský kraj: Hrubšice W of Ivančice, slope in the left bank of Jihlava	49.0906°N 16.3137°E	no voucher		6440	MW443838	MW443947					this study
HE001723	22	86	Helix	ligata	authors			Italy: Basilicata: Potenza: Episcopia	40.0706°N 16.0992°E			Hlg		KF986839					Dahirel et al. 2015
HE001724	21	76	Helix	ligata	authors			Italy: Abruzzo: L’Aquila: Monte Sirente	42.15°N 13.61°E	Folco Giusti collection, University of Siena	26253	SIR1		KU869836					Fiorentino et al. 2016	geographic coordinates only indicative; Helix pomatella sensu authors; UTM: 33TUG86
HE001725	8	26	Helix	vladika	Korábek O.	2015	shell	Montenegro: between Miloševići and Krnovo	42.9059°N 19.0908°E	SMF	360472	VLAD		MW443948	MW465510		MW465486		this study					MW194316		MW194300	MW194312	MW194307	MW194304
HE001726	13	44	Helix	buchii	Korábek O.	2020	mtDNA	Turkey: Giresun Prov., Kovanlık	40.68°N 38.14°E	coll. Mumladze L.?		BC13	KP072253	KP072164					Korábek et al. 2015	geographic coordinates only indicative; locality information provided in Korábek et al. 2015 was swapped in error with BC12 and BC14; sample provided by L. Mumladze but note that Mulmadze et al. (2013) reported from the same locality three individuals with a different mtDNA lineage; sample not shown in fig. S..
HE001727	21	76	Helix	ligata	authors			Italy: Abruzzo: L’Aquila: Monte Sirente	42.15°N 13.61°E	Folco Giusti collection, University of Siena	26253	SIR4		KU869839					Fiorentino et al. 2016	geographic coordinates only indicative; Helix pomatella sensu authors; UTM: 33TUG86
HE001728	55	205	Caucasotachea	vindobonensis	authors			Hungary: Komárom-Esztergom county: Esztergom	47.7786°N 18.7211°E					KT371409					Schmera et al. 2016
HE001729	56	210	Caucasotachea	atrolabiata	authors			Russia: Stavropol: Stavropol, Russian forest near Komsomolsky Reservoir, deciduous forest	45.0481°N 41.9567°E	ZMH	86714			KT794352					Neiber et al. 2016
HE001730	56	210	Caucasotachea	atrolabiata	authors			Russia: Adygeya: Left bank of Dakhovskaya Canyon, limestone walls in northern part	44.2819°N 40.1781°E	ZMH	86669			KT794353					Neiber et al. 2016
HE001731	56	210	Caucasotachea	atrolabiata	authors			Russia: Krasnodar: Azish-Tau Ridge: near touristic base "Gornaya Kuban", stony Fagus orientalis forest	44.1803°N 40.0817°E	ZMH	86716			KT794354					Neiber et al. 2016
HE001732	56	210	Caucasotachea	atrolabiata	authors			Russia: Krasnodar: Urushten valley (right side) 1 km upstream of bridge at Kordon Chernorechye	43.9319°N 40.6778°E	ZMH	86730			KT794355					Neiber et al. 2016
HE001733	56	210	Caucasotachea	atrolabiata	authors			Russia: Krasnodar: Chilipsi river valley 500 m N of Indyuk	44.2428°N 39.2436°E	ZMH	86794			KT794356					Neiber et al. 2016
HE001734	56	211	Caucasotachea	atrolabiata	authors			Russia: Krasnodar: Khosta, yew and box forest	43.5306°N 39.8750°E	ZMH	86824			KT794357					Neiber et al. 2016
HE001735	56	211	Caucasotachea	atrolabiata	authors			Russia: Krasnodar: Khleborob, 1.2 km along road towards Illarionovka	43.5719°N 39.8900°E	ZMH	86653			KT794358					Neiber et al. 2016
HE001736	56	210	Caucasotachea	atrolabiata	authors			Russia: Krasnodar: Abrau-Dyurso, Sukhaya Shel near broken dam of reservoir	44.7383°N 37.5658°E	ZMH	86674			KT794359					Neiber et al. 2016
HE001737	56	210	Caucasotachea	atrolabiata	authors			Russia: Adygeya: Molchepa riverside 6 km SE Guzeripl (right tributary of Belaya river), bank of small brook in beech forest	43.9594°N 40.1767°E	ZMH	86701			KT794360					Neiber et al. 2016
HE001738	56	210	Caucasotachea	atrolabiata	authors			Russia: Adygeya: Northern end of Dakhovskaya Canyon near quarry, limestone cliffs	44.2844°N 40.1778°E	ZMH	86705			KT794361					Neiber et al. 2016
HE001739	56	210	Caucasotachea	atrolabiata	authors			Russia: Krasnodar: Solokhaul, banks of Shakhe river	43.7983°N 39.6803°E	ZMH	86713			KT794362					Neiber et al. 2016
HE001740	56	210	Caucasotachea	atrolabiata	authors			Russia: Krasnodar: Urushten valley, ride side, at mouth of Tryu river, Alnus forest	43.9336°N 40.6339°E	ZMH	86717			KT794363					Neiber et al. 2016
HE001741	56	209	Caucasotachea	atrolabiata	authors			Russia: Krasnodar: Sochi, Kazachiy Brod towards Krasnaya Polyana, 300 m after tunnel	43.5238°N 40.0000°E	ZMH	86718			KT794364					Neiber et al. 2016
HE001742	56	210	Caucasotachea	atrolabiata	authors			Russia: Adygeya: Syuk valley (right tributary of Belaya river between Dakhovskaya and Khamyshki)	44.1592°N 40.1742°E	ZMH	86719			KT794365					Neiber et al. 2016
HE001743	56	211	Caucasotachea	atrolabiata	authors			Russia: Krasnodar: 1.2 km NE of Kalinovoye Ozero, small brook in Fagus orientalis forest	43.6208°N 39.9006°E	ZMH	86725			KT794366					Neiber et al. 2016
HE001744	56	210	Caucasotachea	atrolabiata	authors			Russia: Krasnodar: Dagomys, 14.5 km along road towards Solokhaul	43.7586°N 39.6533°E	ZMH	86729			KT794367					Neiber et al. 2016
HE001745	56	210	Caucasotachea	atrolabiata	authors			Russia: Krasnodar: Gornyy, young Fraxinus sp./Carpinus sp. forest along street opposite of village	44.8492°N 37.7211°E	ZMH	86738			KT794368					Neiber et al. 2016
HE001746	56	210	Caucasotachea	atrolabiata	authors			Russia: Krasnodar: Praskoveyevka to Divnomorskoye, 700m NE of Dzhankhot, deciduous forest	44.4747°N 38.1683°E	ZMH	86808			KT794369					Neiber et al. 2016
HE001747	56	210	Caucasotachea	atrolabiata	authors			Russia: Adygeya: Left bank of Dakhovskaya Canyon, near waterfall	44.2706°N 40.1867°E	ZMH	86868			KT794370					Neiber et al. 2016
HE001748	56	210	Caucasotachea	atrolabiata	authors			Russia: Krasnodar: Kordon Chernorechye (camp of Caucasian reserve): left side of Mala Laba river at bridge over river Urushten	43.9331°N 40.6833°E	ZMH	86869			KT794371					Neiber et al. 2016
HE001749	56	210	Caucasotachea	atrolabiata	authors			Russia: Krasnodar: Aderbiyevka, 4.5 km upstream of village	44.6483°N 38.0889°E	ZMH	86882			KT794372					Neiber et al. 2016
HE001750	56	209	Caucasotachea	atrolabiata	authors			Russia: Krasnodar: Monastyr towards Kepsha, along old road through the gorge	43.6017°N 40.0219°E	ZMH	86883			KT794373					Neiber et al. 2016
HE001751	56	210	Caucasotachea	atrolabiata	authors			Russia: Krasnodar: Buzlachkovaye Shel 3.3 km along road upstream of Fanagoriyskoye (left branch of Psekups river), deciduous forest	44.4964°N 39.0694°E	ZMH	86893			KT794374					Neiber et al. 2016
HE001752	56	210	Caucasotachea	atrolabiata	authors			Russia: Krasnodar: Apsheronsk , road P254 towards Maykop at km 30/112	44.4683°N 39.8511°E	ZMH	86905			KT794375					Neiber et al. 2016
HE001753	56	210	Caucasotachea	atrolabiata	authors			Russia: Krasnodar: Nikitino, left side of Mala Laba river opposite of village, grassy patches within dry Carpinus forest	43.9689°N 40.7056°E	ZMH	86911			KT794376					Neiber et al. 2016
HE001754	56	209	Caucasotachea	atrolabiata	authors			Russia: Krasnodar: Monastyr towards Kepsha, gorge of Mzymta valley, waterfall above road tunnel	43.6528°N 40.1525°E	ZMH	86919			KT794377					Neiber et al. 2016
HE001755	56	210	Caucasotachea	atrolabiata	authors			Russia: Krasnodar: S of Praskoveyevka, narrow gorge beside Dzhankhot valley	44.4692°N 38.2172°E	ZMH	86926			KT794378					Neiber et al. 2016
HE001756	56	210	Caucasotachea	atrolabiata	authors			Russia: Krasnodar: Belorechensk, riparian forest (Quercus sp., Crataegus sp., Acer sp.)	44.7381°N 39.9392°E	ZMH	86949			KT794379					Neiber et al. 2016
HE001757	56	209	Caucasotachea	atrolabiata	authors			Russia: Krasnodar: Monastyr, western end of gorge near trout farm	43.5933°N 40.0175°E	ZMH	86957			KT794380					Neiber et al. 2016
HE001758	56	209	Caucasotachea	atrolabiata	authors			Russia: Krasnodar: Monastyr, western end of gorge near trout farm	43.5933°N 40.0175°E	ZMH	86957			KT794381					Neiber et al. 2016
HE001759	56	210	Caucasotachea	atrolabiata	authors			Russia: Krasnodar: Abrau-Dyurso, near Camp Limanchik	44.6742°N 37.5861°E	ZMH	100018			KT794382					Neiber et al. 2016
HE001760	56	208	Caucasotachea	atrolabiata	authors			Turkey: Ordu: Ünye, Ünye castle	41.0958°N 37.2397°E	ZMH	96175			KT794383					Neiber et al. 2016	C. intercedens sensu Neubert & Bank 2006
HE001761	56	208	Caucasotachea	atrolabiata	authors			Turkey: Ordu: Ünye 3 km along road towards Tokat	41.1111°N 37.2583°E	ZMH	96414			KT794384					Neiber et al. 2016	C. intercedens sensu Neubert & Bank 2006
HE001762	56	211	Caucasotachea	atrolabiata	authors			Turkey: Ordu: Ulubey, NE outskirts	40.8864°N 37.7858°E	ZMH	96198			KT794385					Neiber et al. 2016	C. intercedens sensu Neubert & Bank 2006 ; GPS coordinates corrected to correspond to locality description
HE001763	56	211	Caucasotachea	atrolabiata	authors			Turkey: Ordu: Persembe, Mersin, 1.5 km along road towards Persembe	41.1147°N 37.7839°E	ZMH	96470			KT794386					Neiber et al. 2016	C. intercedens sensu Neubert & Bank 2006
HE001764	56	211	Caucasotachea	atrolabiata	authors			Turkey: Giresun: 7 km along road from junction towards Dereli	40.8544°N 38.4550°E	ZMH	96582			KT794387					Neiber et al. 2016	C. intercedens sensu Neubert & Bank 2006
HE001765	56	211	Caucasotachea	atrolabiata	authors			Turkey: Giresun: Giresun towards Dereli, junction ca. 0.5 km along road S of Duroglu	40.8328°N 38.4739°E	ZMH	96289			KT794388					Neiber et al. 2016	C. intercedens sensu Neubert & Bank 2006
HE001766	56	207	Caucasotachea	atrolabiata	authors			Turkey: Trabzon: Maçka, Maçka towards Sumela monastery, at junction towards Cosandere köyü, 460 m	40.7544°N 39.6225°E	ZMH	96354			KT794389					Neiber et al. 2016	C. intercedens sensu Neubert & Bank 2006
HE001767	56	207	Caucasotachea	atrolabiata	authors			Turkey: Trabzon: S of Arakli, junction towards Yesilyurt	40.8772°N 40.0214°E	ZMH	96447			KT794390					Neiber et al. 2016	C. intercedens sensu Neubert & Bank 2006
HE001768	56	207	Caucasotachea	atrolabiata	authors			Turkey: Artvin: Borçka, ca. 2 km along road N of town	41.3797°N 41.6878°E	ZMH	96474			KT794391					Neiber et al. 2016	C. calligera sensu Neubert & Bank 2006
HE001769	56	207	Caucasotachea	atrolabiata	authors			Turkey: Artvin: Hopa, Cankurtaran Geçidi (pass): ca. 2 km along road W of highest point	41.4036°N 41.5147°E	ZMH	96214			KT794392					Neiber et al. 2016	C. calligera sensu Neubert & Bank 2006
HE001770	56	207	Caucasotachea	atrolabiata	authors			Georgia: Ajaria: Batumi, 800 m NW of Sameba church (=3 km along road from church towards coast)	41.6367°N 41.6872°E	ZMH	86155			KT794393					Neiber et al. 2016	C. calligera sensu Neubert & Bank 2006
HE001771	56	207	Caucasotachea	atrolabiata	authors			Georgia: Ajaria: Batumi, 800 m NW of Sameba church (=3 km along road from church towards coast)	41.6367°N 41.6872°E	ZMH	86155			KT794394					Neiber et al. 2016	C. calligera sensu Neubert & Bank 2006
HE001772	56	207	Caucasotachea	atrolabiata	authors			Georgia: Samegrelo and Zemo Svaneti: Jvari, road Zugdidi-Mestia at km 33/165	42.7514°N 42.0472°E	ZMH	100533			KT794395					Neiber et al. 2016	C. calligera sensu Neubert & Bank 2006
HE001773	56	207	Caucasotachea	atrolabiata	authors			Georgia: Kvemo Kartli: N of Shindisi, gorge of Tsavkisis-Khevi	41.6758°N 44.7642°E	ZMH	81609			KT794396					Neiber et al. 2016	C. calligera sensu Neubert & Bank 2006
HE001774	56	207	Caucasotachea	atrolabiata	authors			Georgia: Racha-Lechkhumi and Kvemo Svaneti: Isunderi, road Tsageri-Tsqaltubo, from junction to Isunderi 4.3 km along road towards Tsqaltubo	42.5119°N 42.6372°E	ZMH	81638			KT794397					Neiber et al. 2016	C. calligera sensu Neubert & Bank 2006
HE001775	56	207	Caucasotachea	atrolabiata	authors			Georgia: Mtskheta-Mtianeti: Zhinvali, 6 km along road towards Tianeti	42.1392°N 44.8167°E	ZMH	81682			KT794398					Neiber et al. 2016	C. calligera sensu Neubert & Bank 2006
HE001776	56	207	Caucasotachea	atrolabiata	authors			Georgia: Samegrelo and Zemo Svaneti: 200 m S of Qulevi	42.2694°N 41.6539°E	ZMH	86164			KT794399					Neiber et al. 2016	C. calligera sensu Neubert & Bank 2006
HE001777	56	207	Caucasotachea	atrolabiata	authors			Georgia: Samtskhe-Javakheti: 2.5 km along road S of Borjomi	41.8039°N 43.3219°E	ZMH	86498			KT794400					Neiber et al. 2016	C. calligera sensu Neubert & Bank 2006
HE001778	56	207	Caucasotachea	atrolabiata	authors			Georgia: Imereti: Gamogma-Noga, S of Kveda Gordi	42.4294°N 42.5186°E	ZMH	81612			KT794401					Neiber et al. 2016	C. calligera sensu Neubert & Bank 2006
HE001779	56	207	Caucasotachea	atrolabiata	authors			Georgia: Imereti: Matkhoji, street to Gordi at junction towards Sukhcha (300 m S of Khidi)	42.4117°N 42.4706°E	ZMH	81659			KT794402					Neiber et al. 2016	C. calligera sensu Neubert & Bank 2006
HE001780	56	207	Caucasotachea	atrolabiata	authors			Georgia: Racha-Lechkhumi and Kvemo Svaneti: Zubi, road Tsageri-Tsqaltubo junction to Zubi	42.5761°N 42.6808°E	ZMH	81670			KT794403					Neiber et al. 2016	C. calligera sensu Neubert & Bank 2006
HE001781	56	207	Caucasotachea	atrolabiata	authors			Georgia: Racha-Lechkhumi and Kvemo Svaneti: Oni, 11.5 km along road towards Gupta, at junction Chordi	42.5253°N 43.5272°E	ZMH	81671			KT794404					Neiber et al. 2016	C. calligera sensu Neubert & Bank 2006
HE001782	56	207	Caucasotachea	atrolabiata	authors			Georgia: Imereti: Kutaisi, Ukimerioni hill	42.2786°N 42.7008°E	ZMH	81754			KT794405					Neiber et al. 2016	C. calligera sensu Neubert & Bank 2006
HE001783	56	207	Caucasotachea	atrolabiata	authors			Georgia: Imereti: Tskhunkuri, 4 km along road towards Tsageri (W of Dzedzileti)	42.4222°N 42.5722°E	ZMH	81826			KT794406					Neiber et al. 2016	C. calligera sensu Neubert & Bank 2006
HE001784	56	208	Caucasotachea	atrolabiata	authors			Georgia: Ajaria: Dandalo, near histrorical bridge	41.6475°N 42.1078°E	ZMH	81839			KT794407					Neiber et al. 2016	C. calligera sensu Neubert & Bank 2006
HE001785	56	207	Caucasotachea	atrolabiata	authors			Georgia: Samegrelo and Zemo Svaneti: Taleri, Tekhuri valley 5.1 km along road towards Lebarde	42.7633°N 42.3319°E	ZMH	81862			KT794408					Neiber et al. 2016	C. calligera sensu Neubert & Bank 2006
HE001786	56	207	Caucasotachea	atrolabiata	authors			Georgia: Ajaria: Shuakhevi, gorge 2.5 km along road towards Khulo	41.6286°N 42.2150°E	ZMH	86027			KT794409					Neiber et al. 2016	C. calligera sensu Neubert & Bank 2006
HE001787	56	207	Caucasotachea	atrolabiata	authors			Georgia: Samegrelo and Zemo Svaneti: Taleri, Tekhuri valley 6.7 km along road towards Lebarde	42.5989°N 42.3497°E	ZMH	86030			KT794410					Neiber et al. 2016	C. calligera sensu Neubert & Bank 2006
HE001788	56	207	Caucasotachea	atrolabiata	authors			Georgia: Ajaria: Chikuneti in Machakhlistsqali valley, Chikuneti fortress	41.5061°N 41.8375°E	ZMH	86053			KT794411					Neiber et al. 2016	C. calligera sensu Neubert & Bank 2006
HE001789	56	207	Caucasotachea	atrolabiata	authors			Georgia: Ajaria: Batumi, Sameba church	41.6325°N 41.6936°E	ZMH	86057			KT794412					Neiber et al. 2016	C. calligera sensu Neubert & Bank 2006
HE001790	56	207	Caucasotachea	atrolabiata	authors			Georgia: Samegrelo and Zemo Svaneti: Chaladidi, 0.5 km along road towards Senaki	42.2331°N 41.8472°E	ZMH	86062			KT794413					Neiber et al. 2016	C. calligera sensu Neubert & Bank 2006
HE001791	56	207	Caucasotachea	atrolabiata	authors			Georgia: Imereti: Oncheishi, road Kutaisi-Alpana at km 31.5 (Tvishi 12.1 km along road towards Kutaisi)	42.4439°N 42.7561°E	ZMH	86070			KT794414					Neiber et al. 2016	C. calligera sensu Neubert & Bank 2006
HE001792	56	207	Caucasotachea	atrolabiata	authors			Georgia: Imereti: Tsqaltubo, Kumistavi, around Prometheus cave	42.3742°N 42.5967°E	ZMH	86114			KT794415					Neiber et al. 2016	C. calligera sensu Neubert & Bank 2006
HE001793	56	207	Caucasotachea	atrolabiata	authors			Georgia: Imereti: SE of Khreiti	42.3431°N 43.2083°E	ZMH	86156			KT794416					Neiber et al. 2016	C. calligera sensu Neubert & Bank 2006
HE001794	56	207	Caucasotachea	atrolabiata	authors			Georgia: Ajaria: 1.2 km along road SW of Pirveli Maisi	41.5769°N 41.8678°E	ZMH	86163			KT794417					Neiber et al. 2016	C. calligera sensu Neubert & Bank 2006
HE001795	56	207	Caucasotachea	atrolabiata	authors			Georgia: Ajaria: Kirnati, Chorokhi valley 6.5 km along road upstream of Acharistsqali	41.5019°N 41.7150°E	ZMH	86165			KT794418					Neiber et al. 2016	C. calligera sensu Neubert & Bank 2006
HE001796	56	207	Caucasotachea	atrolabiata	authors			Georgia: Samegrelo and Zemo Svaneti: Balda, 0.6 km along road towards main road Martvili-Taleri	42.4806°N 42.3769°E	ZMH	86166			KT794419					Neiber et al. 2016	C. calligera sensu Neubert & Bank 2006
HE001797	56	207	Caucasotachea	atrolabiata	authors			Georgia: Racha-Lechkhumi and Kvemo Svaneti: Chrebalo, 5.5 km along road towards Kutaisi	42.5486°N 42.9097°E	ZMH	86193			KT794420					Neiber et al. 2016	C. calligera sensu Neubert & Bank 2006
HE001798	56	207	Caucasotachea	atrolabiata	authors			Georgia: Ajaria: Batumi, Botanical garden	41.6953°N 41.7139°E	ZMH	86234			KT794421					Neiber et al. 2016	C. calligera sensu Neubert & Bank 2006
HE001799	56	207	Caucasotachea	atrolabiata	authors			Georgia: Ajaria: Tsikhisdziri, ruins area	41.7675°N 41.7539°E	ZMH	86239			KT794422					Neiber et al. 2016	C. calligera sensu Neubert & Bank 2006
HE001800	56	207	Caucasotachea	atrolabiata	authors			Georgia: Imereti: Chognari, 2 km E of (road Tbilisi-Kutaisi at bridge over Tchishura river)	42.2153°N 42.7981°E	ZMH	86436			KT794423					Neiber et al. 2016	C. calligera sensu Neubert & Bank 2006
HE001801	56	207	Caucasotachea	atrolabiata	authors			Georgia: Racha-Lechkhumi and Kvemo Svaneti: 1 km along road W of Tsesi, gorge at junction to Khimshi	42.5339°N 43.1892°E	ZMH	86437			KT794424					Neiber et al. 2016	C. calligera sensu Neubert & Bank 2006
HE001802	56	207	Caucasotachea	atrolabiata	authors			Georgia: Samegrelo and Zemo Svaneti: Nakalakevi, ruins area	42.3578°N 42.1972°E	ZMH	86469			KT794425					Neiber et al. 2016	C. calligera sensu Neubert & Bank 2006
HE001803	56	207	Caucasotachea	atrolabiata	authors			Georgia: Ajaria: Gonio, ruins of Apsarus fortress	41.5728°N 41.5733°E	ZMH	86470			KT794426					Neiber et al. 2016	C. calligera sensu Neubert & Bank 2006
HE001804	56	207	Caucasotachea	atrolabiata	authors			Georgia: Samegrelo and Zemo Svaneti: Poti, Rustaveli Park	42.1417°N 41.6731°E	ZMH	86475			KT794427					Neiber et al. 2016	C. calligera sensu Neubert & Bank 2006
HE001805	56	207	Caucasotachea	atrolabiata	authors			Georgia: Imereti: Gorge 1 km N of Tvishi (road Kutaisi-Alpana at km 44)	42.5233°N 42.7939°E	ZMH	86476			KT794428					Neiber et al. 2016	C. calligera sensu Neubert & Bank 2006
HE001806	56	207	Caucasotachea	atrolabiata	authors			Georgia: Samegrelo and Zemo Svaneti: Balda, around Jorisku cave	42.5111°N 42.4183°E	ZMH	100311			KT794429					Neiber et al. 2016	C. calligera sensu Neubert & Bank 2006
HE001807	56	207	Caucasotachea	atrolabiata	authors			Georgia: Samegrelo and Zemo Svaneti: Balda, dry meadows above	42.5017°N 42.3975°E	ZMH	100338			KT794430					Neiber et al. 2016	C. calligera sensu Neubert & Bank 2006
HE001808	56	207	Caucasotachea	atrolabiata	authors			Georgia: Samegrelo and Zemo Svaneti: Balda, dry meadows above	42.5017°N 42.3975°E	ZMH	100338			KT794431					Neiber et al. 2016	C. calligera sensu Neubert & Bank 2006
HE001809	56	207	Caucasotachea	atrolabiata	authors			Georgia: Samegrelo and Zemo Svaneti: Nakalakevi 1.5 km along road towards Betlemi, near thermal spring	42.3656°N 42.1950°E	ZMH	100508			KT794432					Neiber et al. 2016	C. calligera sensu Neubert & Bank 2006
HE001810	56	207	Caucasotachea	atrolabiata	authors			Georgia: Ajaria: Batumi, Zelënyy Mys, botanical garden	41.7000°N 41.7167°E	ZMH	100513			KT794433					Neiber et al. 2016	C. calligera sensu Neubert & Bank 2006
HE001811	56	207	Caucasotachea	atrolabiata	authors			Georgia: Samegrelo and Zemo Svaneti: Korkvali, 3.5 km along road towards Zugdidi	42.9814°N 42.2314°E	ZMH	100526			KT794434					Neiber et al. 2016	C. calligera sensu Neubert & Bank 2006
HE001812	56	207	Caucasotachea	atrolabiata	authors			Georgia: Samegrelo and Zemo Svaneti: Nakalakevi, ruins area	42.3578°N 42.1972°E	ZMH	100532			KT794435					Neiber et al. 2016	C. calligera sensu Neubert & Bank 2006
HE001813	56	207	Caucasotachea	atrolabiata	authors			Armenia: Tavush: Ijevan, reservoir S of	40.8560°N 45.1227°E	ZMH	101319			KT794436					Neiber et al. 2016	C. calligera sensu Neubert & Bank 2006
HE001814	11	36	Helix	pomatia	authors			Austria: Niederösterreich: Bisamberg	48.3310°N 16.3620°E	NHMW	Moll 74149_B		KX537620	KX537634					Jaksch et al. 2016
HE001815	11	38	Helix	pomatia	authors			Slovenia: Ljubljana, Sodarska steza	46.0467°N 14.5097°E	USDA	He01EU09		KF247035						Sei et al. 2017	label in GenBank (as of November 2021) swapped with KF247036
HE001816	51	178	Codringtonia	parnassia	authors			Greece: Central Greece: 5 km NNE of Karpenisi, Mt. Timfristos, E of ski resort, near summit	38.95°N 21.82°E	RMNH	EG1058			AF538289					Gittenberger et al. 2004
HE001817	52	184	Codringtonia	helenae	authors			Greece: Peloponnese: Mt. Mainalo	37.64°N 22.27°E			Ch_MEN19_R4_2		KC756165					Parmakelis et al. 2013
HE001818	52	184	Codringtonia	helenae	authors			Greece: Peloponnese: Mt. Mainalo	37.64°N 22.27°E			Ch_MEN21_R2_1		KC756166					Parmakelis et al. 2013
HE001819	55	204	Caucasotachea	vindobonensis	authors			Slovakia: Zliechov env., Strážov	48.948°N 18.450°E	NHMW	109000/AL/00505/210		KF596835	KF596882		KF596787			Cadahía et al. 2014
HE001820	55	205	Caucasotachea	vindobonensis	authors			Bulgaria: Lovech Prov.: Balkanec, Beklemeto	42.783°N 24.625°E					KU341667					Kajtoch et al. 2017
HE001821	55	205	Caucasotachea	vindobonensis	authors			Bulgaria: Lovech Prov.: Balkanec, Beklemeto	42.783°N 24.625°E					KU341668					Kajtoch et al. 2017
HE001822	55	205	Caucasotachea	vindobonensis	authors			Bulgaria: Lovech Prov.: Balkanec, Beklemeto	42.783°N 24.625°E					KU341669					Kajtoch et al. 2017
HE001823	55	203	Caucasotachea	vindobonensis	authors			Poland: Lublin Voiv.: Bychawa, Podzamcze	51.024°N 22.531°E					KU341559					Kajtoch et al. 2017
HE001824	55	203	Caucasotachea	vindobonensis	authors			Poland: Lublin Voiv.: Bychawa, Podzamcze	51.024°N 22.531°E					KU341560					Kajtoch et al. 2017
HE001825	55	203	Caucasotachea	vindobonensis	authors			Poland: Podkarpackie Voiv.: Łysaków	50.761°N 22.190°E					KU341561					Kajtoch et al. 2017
HE001826	55	203	Caucasotachea	vindobonensis	authors			Poland: Podkarpackie Voiv.: Łysaków	50.761°N 22.190°E					KU341562					Kajtoch et al. 2017
HE001827	55	203	Caucasotachea	vindobonensis	authors			Poland: Lublin Voiv.: Witoszyn	51.323°N 22.048°E					KU341563					Kajtoch et al. 2017
HE001828	55	203	Caucasotachea	vindobonensis	authors			Poland: Lublin Voiv.: Witoszyn	51.323°N 22.048°E					KU341564					Kajtoch et al. 2017
HE001829	55	203	Caucasotachea	vindobonensis	authors			Poland: Lublin Voiv.: Kazimierz Dolny, Okale	51.304°N 21.898°E					KU341565					Kajtoch et al. 2017
HE001830	55	203	Caucasotachea	vindobonensis	authors			Poland: Lublin Voiv.: Kazimierz Dolny, Okale	51.304°N 21.898°E					KU341566					Kajtoch et al. 2017
HE001831	55	203	Caucasotachea	vindobonensis	authors			Poland: Świętokrzyskie Voiv.: Pińczów	50.536°N 20.516°E					KU341567					Kajtoch et al. 2017
HE001832	55	203	Caucasotachea	vindobonensis	authors			Poland: Świętokrzyskie Voiv.: Pińczów	50.536°N 20.516°E					KU341568					Kajtoch et al. 2017
HE001833	55	203	Caucasotachea	vindobonensis	authors			Poland: Świętokrzyskie Voiv.: Kielce	50.855°N 20.644°E					KU341569					Kajtoch et al. 2017
HE001834	55	203	Caucasotachea	vindobonensis	authors			Poland: Świętokrzyskie Voiv.: Kielce	50.855°N 20.644°E					KU341570					Kajtoch et al. 2017
HE001835	55	203	Caucasotachea	vindobonensis	authors			Poland: Świętokrzyskie Voiv.: Chocimów	50.941°N 21.255°E					KU341571					Kajtoch et al. 2017
HE001836	55	203	Caucasotachea	vindobonensis	authors			Poland: Świętokrzyskie Voiv.: Chocimów	50.941°N 21.255°E					KU341572					Kajtoch et al. 2017
HE001837	55	203	Caucasotachea	vindobonensis	authors			Poland: Lesser Poland Voiv.: Jaworki	49.400°N 20.582°E					KU341573					Kajtoch et al. 2017
HE001838	55	203	Caucasotachea	vindobonensis	authors			Poland: Lesser Poland Voiv.: Jaworki	49.400°N 20.582°E					KU341574					Kajtoch et al. 2017
HE001839	55	203	Caucasotachea	vindobonensis	authors			Poland: Lesser Poland Voiv.: Jaworki	49.400°N 20.582°E					KU341575					Kajtoch et al. 2017
HE001840	55	203	Caucasotachea	vindobonensis	authors			Poland: Lesser Poland Voiv.: Jaworki	49.400°N 20.582°E					KU341576					Kajtoch et al. 2017
HE001841	55	203	Caucasotachea	vindobonensis	authors			Poland: West Pomeranian Voiv.: Stary Załom reserve	53.085°N 16.049°E					KU341577					Kajtoch et al. 2017
HE001842	55	203	Caucasotachea	vindobonensis	authors			Poland: Greater Poland Voiv.: Czarnków env.	52.880°N 16.496°E					KU341578					Kajtoch et al. 2017
HE001843	55	203	Caucasotachea	vindobonensis	authors			Poland: Greater Poland Voiv.: Byszewice	53.085°N 16.959°E					KU341579					Kajtoch et al. 2017
HE001844	55	203	Caucasotachea	vindobonensis	authors			Poland: Greater Poland Voiv.: Byszewice	53.085°N 16.959°E					KU341580					Kajtoch et al. 2017
HE001845	55	203	Caucasotachea	vindobonensis	authors			Poland: Greater Poland Voiv.: Byszewice	53.085°N 16.959°E					KU341581					Kajtoch et al. 2017
HE001846	55	203	Caucasotachea	vindobonensis	authors			Poland: Greater Poland Voiv.: Byszewice	53.085°N 16.959°E					KU341582					Kajtoch et al. 2017
HE001847	55	203	Caucasotachea	vindobonensis	authors			Poland: Greater Poland Voiv.: Miasteczko Krajeńskie	53.099°N 17.006°E					KU341583					Kajtoch et al. 2017
HE001848	55	203	Caucasotachea	vindobonensis	authors			Poland: Greater Poland Voiv.: Miasteczko Krajeńskie	53.099°N 17.006°E					KU341584					Kajtoch et al. 2017
HE001849	55	203	Caucasotachea	vindobonensis	authors			Poland: Łódź Voiv.: Widawa	51.448°N 18.961°E					KU341585					Kajtoch et al. 2017
HE001850	55	203	Caucasotachea	vindobonensis	authors			Poland: Łódź Voiv.: Widawa	51.448°N 18.961°E					KU341586					Kajtoch et al. 2017
HE001851	55	203	Caucasotachea	vindobonensis	authors			Poland: Masovia Voiv.: Brudzeń Duży	52.658°N 19.537°E					KU341587					Kajtoch et al. 2017
HE001852	55	203	Caucasotachea	vindobonensis	authors			Poland: Masovia Voiv.: Brudzeń Duży	52.658°N 19.537°E					KU341588					Kajtoch et al. 2017
HE001853	55	203	Caucasotachea	vindobonensis	authors			Poland: Masovian Voiv.: Wyszogród	52.390°N 20.208°E					KU341589					Kajtoch et al. 2017
HE001854	55	203	Caucasotachea	vindobonensis	authors			Poland: Masovian Voiv.: Wyszogród	52.390°N 20.208°E					KU341590					Kajtoch et al. 2017
HE001855	55	203	Caucasotachea	vindobonensis	authors			Poland: Podkarpackie Voiv.: Rzeszów	50.0°N 22.0°E					KU341591					Kajtoch et al. 2017	geographic coordinates only indicative
HE001856	55	203	Caucasotachea	vindobonensis	authors			Poland: Podkarpackie Voiv.: Rzeszów	50.0°N 22.0°E					KU341592					Kajtoch et al. 2017	geographic coordinates only indicative
HE001857	55	203	Caucasotachea	vindobonensis	authors			Poland: Podkarpackie Voiv.: Rzeszów	50.0°N 22.0°E					KU341593					Kajtoch et al. 2017	geographic coordinates only indicative
HE001858	55	203	Caucasotachea	vindobonensis	authors			Poland: Podkarpackie Voiv.: Tarnobrzeg	50.512°N 21.615°E					KU341594					Kajtoch et al. 2017	geographic coordinates only indicative
HE001859	55	203	Caucasotachea	vindobonensis	authors			Poland: Podkarpackie Voiv.: Tarnobrzeg	50.512°N 21.615°E					KU341595					Kajtoch et al. 2017	geographic coordinates only indicative
HE001860	55	203	Caucasotachea	vindobonensis	authors			Poland: Podkarpackie Voiv.: Tarnobrzeg	50.512°N 21.615°E					KU341596					Kajtoch et al. 2017	geographic coordinates only indicative
HE001861	55	203	Caucasotachea	vindobonensis	authors			Czechia: Archlebov	49.067°N 16.995°E					KU341597					Kajtoch et al. 2017
HE001862	55	203	Caucasotachea	vindobonensis	authors			Czechia: Archlebov	49.067°N 16.995°E					KU341598					Kajtoch et al. 2017
HE001863	55	203	Caucasotachea	vindobonensis	authors			Czechia: Archlebov	49.067°N 16.995°E					KU341599					Kajtoch et al. 2017
HE001864	55	203	Caucasotachea	vindobonensis	authors			Czechia: Archlebov	49.067°N 16.995°E					KU341600					Kajtoch et al. 2017
HE001865	55	203	Caucasotachea	vindobonensis	authors			Czechia: Archlebov	49.067°N 16.995°E					KU341601					Kajtoch et al. 2017
HE001866	55	203	Caucasotachea	vindobonensis	authors			Czechia: Levousy	50.388°N 13.976°E					KU341602					Kajtoch et al. 2017
HE001867	55	203	Caucasotachea	vindobonensis	authors			Czechia: Levousy	50.388°N 13.976°E					KU341603					Kajtoch et al. 2017
HE001868	55	203	Caucasotachea	vindobonensis	authors			Czechia: Levousy	50.388°N 13.976°E					KU341604					Kajtoch et al. 2017
HE001869	55	203	Caucasotachea	vindobonensis	authors			Czechia: Levousy	50.388°N 13.976°E					KU341605					Kajtoch et al. 2017
HE001870	55	203	Caucasotachea	vindobonensis	authors			Czechia: Levousy	50.388°N 13.976°E					KU341606					Kajtoch et al. 2017
HE001871	55	203	Caucasotachea	vindobonensis	authors			Czechia: Chropyně	49.366°N 17.352°E					KU341607					Kajtoch et al. 2017
HE001872	55	203	Caucasotachea	vindobonensis	authors			Czechia: Chropyně	49.366°N 17.352°E					KU341608					Kajtoch et al. 2017
HE001873	55	205	Caucasotachea	vindobonensis	authors			Slovakia: E of Bratislava	48.158°N 17.035°E					KU341609					Kajtoch et al. 2017
HE001874	55	205	Caucasotachea	vindobonensis	authors			Slovakia: E of Bratislava	48.158°N 17.035°E					KU341611					Kajtoch et al. 2017
HE001875	55	205	Caucasotachea	vindobonensis	authors			Slovakia: E of Bratislava	48.158°N 17.035°E					KU341612					Kajtoch et al. 2017
HE001876	55	205	Caucasotachea	vindobonensis	authors			Slovakia: E of Bratislava	48.158°N 17.035°E					KU341613					Kajtoch et al. 2017
HE001877	55	205	Caucasotachea	vindobonensis	authors			Slovakia: E of Bratislava	48.158°N 17.035°E					KU341614					Kajtoch et al. 2017
HE001878	55	203	Caucasotachea	vindobonensis	authors			Hungary: Heves County: Hatvan	47.682°N 19.694°E	HNHM	95532			KU341615					Kajtoch et al. 2017
HE001879	55	203	Caucasotachea	vindobonensis	authors			Hungary: Heves County: Hatvan	47.682°N 19.694°E	HNHM	95532			KU341616					Kajtoch et al. 2017
HE001880	55	203	Caucasotachea	vindobonensis	authors			Hungary: Heves County: Hatvan	47.682°N 19.694°E	HNHM	95532			KU341617					Kajtoch et al. 2017
HE001881	55	203	Caucasotachea	vindobonensis	authors			Hungary: Heves County: Hatvan	47.682°N 19.694°E	HNHM	95532			KU341618					Kajtoch et al. 2017
HE001882	55	203	Caucasotachea	vindobonensis	authors			Hungary: Heves County: Hatvan	47.682°N 19.694°E	HNHM	95532			KU341619					Kajtoch et al. 2017
HE001883	55	203	Caucasotachea	vindobonensis	authors			Hungary: Heves County: Hatvan	47.682°N 19.694°E	HNHM	95532			KU341620					Kajtoch et al. 2017
HE001884	55	203	Caucasotachea	vindobonensis	authors			Romania: Hunedoara County: Pojoga	46.003°N 22.396°E					KU341621					Kajtoch et al. 2017
HE001885	55	205	Caucasotachea	vindobonensis	authors			Romania: Hunedoara County: Pojoga	46.003°N 22.396°E					KU341622					Kajtoch et al. 2017
HE001886	55	203	Caucasotachea	vindobonensis	authors			Romania: Hunedoara County: Pojoga	46.003°N 22.396°E					KU341623					Kajtoch et al. 2017
HE001887	55	203	Caucasotachea	vindobonensis	authors			Romania: Hunedoara County: Pojoga	46.003°N 22.396°E					KU341624					Kajtoch et al. 2017
HE001888	55	205	Caucasotachea	vindobonensis	authors			Romania: Hunedoara County: Pojoga	46.003°N 22.396°E					KU341625					Kajtoch et al. 2017
HE001889	55	205	Caucasotachea	vindobonensis	authors			Romania: Hunedoara County: Pojoga	46.003°N 22.396°E					KU341626					Kajtoch et al. 2017
HE001890	55	203	Caucasotachea	vindobonensis	authors			Romania: Sălaj County: Crasna, near Vârșolț	47.178°N 22.889°E	NHMW	110430/MN/0164			KU341627					Kajtoch et al. 2017
HE001891	55	203	Caucasotachea	vindobonensis	authors			Romania: Sălaj County: Crasna, near Vârșolț	47.178°N 22.889°E	NHMW	110430/MN/0164			KU341628					Kajtoch et al. 2017
HE001892	55	203	Caucasotachea	vindobonensis	authors			Romania: Sălaj County: Crasna, near Vârșolț	47.178°N 22.889°E	NHMW	110430/MN/0164			KU341629					Kajtoch et al. 2017
HE001893	55	205	Caucasotachea	vindobonensis	authors			Romania: Iași County: Valea lui David	47.198°N 27.465°E	NHMW	110430/MN/0170			KU341631					Kajtoch et al. 2017
HE001894	55	205	Caucasotachea	vindobonensis	authors			Romania: Iași County: Valea lui David	47.198°N 27.465°E	NHMW	110430/MN/0170			KU341632					Kajtoch et al. 2017
HE001895	55	205	Caucasotachea	vindobonensis	authors			Romania: Vaslui County: Huși	46.697°N 28.102°E	NHMW	110430/MN/0171			KU341633					Kajtoch et al. 2017
HE001896	55	205	Caucasotachea	vindobonensis	authors			Romania: Neamț County: Boiștea	47.185°N 26.437°E	NHMW	110430/MN/0172			KU341634					Kajtoch et al. 2017
HE001897	55	205	Caucasotachea	vindobonensis	authors			Romania: Neamț County: Boiștea	47.185°N 26.437°E	NHMW	110430/MN/0172			KU341635					Kajtoch et al. 2017
HE001898	55	205	Caucasotachea	vindobonensis	authors			Romania: Giurgiu County: Varlaam, Argeș bank	44.253°N 26.092°E					KU341637					Kajtoch et al. 2017
HE001899	55	205	Caucasotachea	vindobonensis	authors			Romania: Giurgiu County: Varlaam, Argeș bank	44.253°N 26.092°E					KU341638					Kajtoch et al. 2017
HE001900	55	203	Caucasotachea	vindobonensis	authors			Serbia: Leskovac Distr.: Predejane	42.833°N 22.132°E	NHMW	110430/MN/0008			KU341639					Kajtoch et al. 2017
HE001901	55	205	Caucasotachea	vindobonensis	authors			Serbia: Kolubara Distr.: Maljen Mts., Valjevo env.	44.185°N 19.873°E	NHMW	110430/MN/0001			KU341640					Kajtoch et al. 2017
HE001902	55	205	Caucasotachea	vindobonensis	authors			Serbia: Zlatibor Distr.: Maljen Mts., Kosjerić env.	43.968°N 19.958°E	NHMW	110430/MN/0002			KU341641					Kajtoch et al. 2017
HE001903	55	205	Caucasotachea	vindobonensis	authors			Serbia: Zlatibor Distr.: Maljen Mts., Kosjerić env.	43.968°N 19.958°E	NHMW	110430/MN/0002			KU341642					Kajtoch et al. 2017
HE001904	55	205	Caucasotachea	vindobonensis	authors			Serbia: Zlatibor Distr.: N of Prijepolje	43.467°N 19.651°E	NHMW	110430/MN/0004			KU341643					Kajtoch et al. 2017
HE001905	55	205	Caucasotachea	vindobonensis	authors			Serbia: Zlatibor Distr.: N of Prijepolje	43.467°N 19.651°E	NHMW	110430/MN/0004			KU341644					Kajtoch et al. 2017
HE001906	55	205	Caucasotachea	vindobonensis	authors			Serbia: Zlatibor Distr.: Užice	43.851°N 19.822°E	NHMW	110430/MN/0003			KU341645					Kajtoch et al. 2017
HE001907	55	203	Caucasotachea	vindobonensis	authors			Serbia: Kolubara Distr.: Gola Glava	44.407°N 19.892°E	NHMW	110430/MN/0011			KU341647					Kajtoch et al. 2017
HE001908	55	203	Caucasotachea	vindobonensis	authors			Serbia: Kolubara Distr.: Gola Glava	44.407°N 19.892°E	NHMW	110430/MN/0011			KU341648					Kajtoch et al. 2017
HE001909	55	205	Caucasotachea	vindobonensis	authors			Serbia: Zlatibor Distr.: Požega env., Tubići	43.951°N 19.984°E	NHMW	110430/MN/0017			KU341649					Kajtoch et al. 2017
HE001910	55	205	Caucasotachea	vindobonensis	authors			Montenegro: south of Nikšić	42.732°N 18.938°E	NHMW	110430/MN/0012			KU341650					Kajtoch et al. 2017
HE001911	55	205	Caucasotachea	vindobonensis	authors			Macedonia: Crni Drin valley, Lukovo	41.362°N 20.604°E	NHMW	110430/MN/0006			KU341651					Kajtoch et al. 2017
HE001912	55	205	Caucasotachea	vindobonensis	authors			Macedonia: Crni Drin valley, Lukovo	41.362°N 20.604°E	NHMW	110430/MN/0006			KU341652					Kajtoch et al. 2017
HE001913	55	205	Caucasotachea	vindobonensis	authors			Macedonia: Drenovo env.	41.740°N 21.552°E					KU341653					Kajtoch et al. 2017
HE001914	55	205	Caucasotachea	vindobonensis	authors			Macedonia: Drenovo env.	41.740°N 21.552°E					KU341654					Kajtoch et al. 2017
HE001915	55	205	Caucasotachea	vindobonensis	authors			Macedonia: Drenovo env.	41.740°N 21.552°E					KU341655					Kajtoch et al. 2017
HE001916	55	205	Caucasotachea	vindobonensis	authors			Macedonia: Drenovo env.	41.740°N 21.552°E					KU341656					Kajtoch et al. 2017
HE001917	55	205	Caucasotachea	vindobonensis	authors			Macedonia: Drenovo env.	41.740°N 21.552°E					KU341657					Kajtoch et al. 2017
HE001918	55	205	Caucasotachea	vindobonensis	authors			Macedonia: Drenovo env.	41.740°N 21.552°E					KU341658					Kajtoch et al. 2017
HE001919	55	203	Caucasotachea	vindobonensis	authors			Croatia: Zagreb env.	45.736°N 15.859°E					KU341659					Kajtoch et al. 2017
HE001920	55	203	Caucasotachea	vindobonensis	authors			Croatia: Zagreb env.	45.736°N 15.859°E					KU341660					Kajtoch et al. 2017
HE001921	55	203	Caucasotachea	vindobonensis	authors			Croatia: Zagreb env.	45.736°N 15.859°E					KU341661					Kajtoch et al. 2017
HE001922	55	205	Caucasotachea	vindobonensis	authors			Albania: Tropojë District, Gurorë	42.287°N 20.021°E	NHMW	110430/MN/0017			KU341662					Kajtoch et al. 2017
HE001923	55	203	Caucasotachea	vindobonensis	authors			Bulgaria: Silistra Prov.: Srebarna reserve	44.103°N 27.063°E					KU341663					Kajtoch et al. 2017
HE001924	55	205	Caucasotachea	vindobonensis	authors			Bulgaria: Silistra Prov.: Srebarna reserve	44.103°N 27.063°E					KU341664					Kajtoch et al. 2017
HE001925	55	203	Caucasotachea	vindobonensis	authors			Bulgaria: Dobrich Prov.: Kavarna env. Bolata	43.384°N 28.472°E					KU341665					Kajtoch et al. 2017
HE001926	55	203	Caucasotachea	vindobonensis	authors			Bulgaria: Blagoevgrad Prov.: Razlog	41.869°N 23.476°E					KU341666					Kajtoch et al. 2017
HE001927	55	203	Caucasotachea	vindobonensis	authors			Bulgaria: Ruse Prov.: Cherven	43.616°N 26.011°E					KU341670					Kajtoch et al. 2017
HE001928	55	203	Caucasotachea	vindobonensis	authors			Bulgaria: Ruse Prov.: Cherven	43.616°N 26.011°E					KU341671					Kajtoch et al. 2017
HE001929	55	205	Caucasotachea	vindobonensis	authors			Russia: Moscow Oblast: Lobnya	56.018°N 37.497°E					KU341673					Kajtoch et al. 2017
HE001930	55	205	Caucasotachea	vindobonensis	authors			Russia: Moscow Oblast: Lobnya	56.018°N 37.497°E					KU341674					Kajtoch et al. 2017
HE001931	55	205	Caucasotachea	vindobonensis	authors			Russia: Moscow Oblast: Lobnya	56.018°N 37.497°E					KU341675					Kajtoch et al. 2017
HE001932	55	205	Caucasotachea	vindobonensis	authors			Russia: Moscow Oblast: Lobnya	56.018°N 37.497°E					KU341676					Kajtoch et al. 2017
HE001933	55	205	Caucasotachea	vindobonensis	authors			Russia: Moscow Oblast: Lobnya	56.018°N 37.497°E					KU341677					Kajtoch et al. 2017
HE001934	55	205	Caucasotachea	vindobonensis	authors			Ukraine: Dnipropetrovs'ka oblast: Zhovti Vody (Zhëltye Vody)	48.354°N 33.526°E	NHMW	110430/MN/0014			KU341678					Kajtoch et al. 2017
HE001935	55	205	Caucasotachea	vindobonensis	authors			Ukraine: Dnipropetrovs'ka oblast: Starolozuvatka	48.377°N 35.374°E	NHMW	110430/MN/0167			KU341679					Kajtoch et al. 2017
HE001936	55	205	Caucasotachea	vindobonensis	authors			Ukraine: Dnipropetrovs'ka oblast: Starolozuvatka	48.377°N 35.374°E	NHMW	110430/MN/0167			KU341680					Kajtoch et al. 2017
HE001937	55	205	Caucasotachea	vindobonensis	authors			Ukraine: Kyivs'ka oblast: Krenychi	50.243°N 30.501°E	NHMW	110430/MN/0168			KU341681					Kajtoch et al. 2017
HE001938	55	203	Caucasotachea	vindobonensis	authors			Ukraine: Rivnens'ka oblast': Radyvyliv	50.118°N 25.269°E					KU341683					Kajtoch et al. 2017
HE001939	55	203	Caucasotachea	vindobonensis	authors			Ukraine: Rivnens'ka oblast': Radyvyliv	50.118°N 25.269°E					KU341684					Kajtoch et al. 2017
HE001940	55	205	Caucasotachea	vindobonensis	authors			Ukraine: Mykolaivs'ka oblast': Voznesensk	47.56°N 31.34°E					KU341685					Kajtoch et al. 2017
HE001941	55	205	Caucasotachea	vindobonensis	authors			Ukraine: Mykolaivs'ka oblast': Voznesensk	47.56°N 31.34°E					KU341686					Kajtoch et al. 2017
HE001942	55	205	Caucasotachea	vindobonensis	authors			Ukraine: Mykolaivs'ka oblast': Voznesensk	47.56°N 31.34°E					KU341687					Kajtoch et al. 2017
HE001943	55	205	Caucasotachea	vindobonensis	authors			Ukraine: Mykolaivs'ka oblast': Voznesensk	47.56°N 31.34°E					KU341688					Kajtoch et al. 2017
HE001944	55	205	Caucasotachea	vindobonensis	authors			Ukraine: Mykolaivs'ka oblast': Kubryaki	47.086°N 31.328°E					KU341689					Kajtoch et al. 2017
HE001945	55	205	Caucasotachea	vindobonensis	authors			Ukraine: Mykolaivs'ka oblast': Kubryaki	47.086°N 31.328°E					KU341690					Kajtoch et al. 2017
HE001946	55	205	Caucasotachea	vindobonensis	authors			Ukraine: Mykolayiv, city	46.938°N 32.052°E					KU341691					Kajtoch et al. 2017
HE001947	55	205	Caucasotachea	vindobonensis	authors			Ukraine: Mykolayiv, city	46.938°N 32.052°E					KU341692					Kajtoch et al. 2017
HE001948	55	205	Caucasotachea	vindobonensis	authors			Ukraine: Donets'ka oblast': Lyman (Krasnyi Lyman) District	48.896°N 37.966°E					KU341693					Kajtoch et al. 2017
HE001949	55	205	Caucasotachea	vindobonensis	authors			Ukraine: Donets'ka oblast': Lyman (Krasnyi Lyman) District	48.896°N 37.966°E					KU341694					Kajtoch et al. 2017
HE001950	55	205	Caucasotachea	vindobonensis	authors			Ukraine: Donets'ka oblast': Lyman (Krasnyi Lyman) District	48.896°N 37.966°E					KU341695					Kajtoch et al. 2017
HE001951	55	205	Caucasotachea	vindobonensis	authors			Ukraine: Donets'ka oblast': Lyman (Krasnyi Lyman) District	48.896°N 37.966°E					KU341696					Kajtoch et al. 2017
HE001952	55	203	Caucasotachea	vindobonensis	authors			Ukraine: Rivnens'ka oblast': Buscha	50.316°N 26.241°E					KU341697					Kajtoch et al. 2017
HE001953	11	36	Helix	pomatia	authors			Italy: Piemonte: Caraglio, Paschera San Carlo	44.44°N 7.41°E					KX241541					Cesaroni et al. 2017	geographic coordinates only indicative
HE001954	11	36	Helix	pomatia	authors			Italy: Piemonte: Morozzo, river Brobbio	44.42°N 7.71°E					KX241542					Cesaroni et al. 2017	geographic coordinates only indicative
HE001955	8	26	Helix	vladika	authors			Montenegro: Mokro near Šavnik	42.95°N 19.08°E	NMBE	23348		MF564117	MF564163					Bouaziz-Yahiatene et al. 2017
HE001956	17	62	Helix	melanostoma	authors			France: Occitanie: Hérault dep., between Rabieux and Saint-Félix-de-Lodez	43.6628°N 3.4409°E	NMBE	540550		MF564116						Bouaziz-Yahiatene et al. 2017	COI MF564162 is not a Helix cox1 sequence
HE001957	17	63	Helix	melanostoma	authors			Tunisia: Kasserine	35.1722°N 8.8307°E	NMBE	520822		MF564115	MK754471					Bouaziz-Yahiatene et al. 2017
HE001958	13	45	Helix	buchii	Korábek O.	2017	mtDNA	Turkey: Giresun Prov.: Kovanlık env.	40.68°N 38.14°E					GU784802					Mumladze et al. 2013	haplotypes were linked to localities using Tab. 1, Figs. 2 and 8 of the paper, and median joining of the data.
HE001959	13	44	Helix	buchii	Korábek O.	2013	mtDNA	Turkey: Rize Prov.: Çamlıhemşin env.	40.93°N 41.14°E					GU784801					Mumladze et al. 2013	haplotypes were linked to localities using Tab. 1, Figs. 2 and 8 of the paper, and median joining of the data.
HE001960	13	44	Helix	buchii	Korábek O.	2013	mtDNA	Georgia: Bakhmaro	41.89°N 42.37°E					GU784798					Mumladze et al. 2013	haplotypes were linked to localities using Tab. 1, Figs. 2 and 8 of the paper, and median joining of the data.
HE001961	13	44	Helix	buchii	Korábek O.	2013	mtDNA	Georgia: Bakhmaro	41.89°N 42.37°E					GU784797					Mumladze et al. 2013	haplotypes were linked to localities using Tab. 1, Figs. 2 and 8 of the paper, and median joining of the data.
HE001962	13	44	Helix	buchii	Korábek O.	2013	mtDNA	Georgia: Mokhva env.	42.43°N 43.30°E					GU784806					Mumladze et al. 2013	haplotypes were linked to localities using Tab. 1, Figs. 2 and 8 of the paper, and median joining of the data.
HE001963	13	44	Helix	buchii	Korábek O.	2013	mtDNA	Georgia: Khevsha	42.40°N 44.69°E					GU784806					Mumladze et al. 2013	haplotypes were linked to localities using Tab. 1, Figs. 2 and 8 of the paper, and median joining of the data.
HE001964	13	44	Helix	buchii	Korábek O.	2013	mtDNA	Georgia: Borjomi env.	41.91°N 43.25°E					GU784799					Mumladze et al. 2013	haplotypes were linked to localities using Tab. 1, Figs. 2 and 8 of the paper, and median joining of the data.
HE001965	13	44	Helix	buchii	Korábek O.	2013	mtDNA	Georgia: Didgori	41.78°N 44.51°E					GU784799					Mumladze et al. 2013	haplotypes were linked to localities using Tab. 1, Figs. 2 and 8 of the paper, and median joining of the data.
HE001966	13	44	Helix	buchii	Korábek O.	2013	mtDNA	Georgia: Dmanisi env.	41.33°N 44.35°E					GU784799					Mumladze et al. 2013	haplotypes were linked to localities using Tab. 1, Figs. 2 and 8 of the paper, and median joining of the data.
HE001967	13	44	Helix	buchii	Korábek O.	2013	mtDNA	Georgia: Lagodekhi	41.85°N 46.29°E					GU784799					Mumladze et al. 2013	haplotypes were linked to localities using Tab. 1, Figs. 2 and 8 of the paper, and median joining of the data.
HE001968	24	89	Helix	lucorum	Korábek O.	2013	shell	Serbia: Pirot Distr.: Jelovica	43.2057°N 22.8312°E	NMP		LC111	MW443576						this study
HE001969	57	214	Caucasotachea	leucoranea	Korábek O.	2018	shell	Azerbaijan: between Lənkəran and Hirkan, headquarters of Hirkan National Park	38.6805°N 48.806°E	NMP	P6M 30489	CA22	MW443578	MW443949					this study
HE001970	57	215	Caucasotachea	leucoranea	Korábek O.	2018	shell	Azerbaijan: National Park Hirkan, Daştatük yolu by Xanbulan gölü	38.6672°N 48.7743°E	NMP	P6M 30486	CA20	MW443579	MW443950					this study
HE001971	31	117	Helix	godetiana	Korábek O.	2012	shell	Greece: Cyclades: Santorini, under rocks between Profitis Illias Monastery and Mesa Vouno	36.368°N 25.473°E	MHNG	17941	GT3	MW443582	MW443951					this study	geographic coordinates only indicative
HE001972	55	205	Caucasotachea	vindobonensis	Korábek O.	2017	shell	Ukraine: Vinnytsya Oblast: forest W of Naddnistryans’ke, forest above the river Materka	48.6608°N 27.3947°E	NMP	P6M 30394	vindob	MW443580	MW443952					this study		MW465459
HE001973	57	217	Caucasotachea	leucoranea	Korábek O.	2018	shell	Azerbaijan: National Park Hirkan, Daştatük yolu by Xanbulan gölü	38.6672°N 48.7743°E	NMP	P6M 30487	CA21	MW443581	MW443953					this study
HE001974	11	36	Helix	pomatia	authors			Italy: Piemonte: Morozzo, river Brobbio	44.42°N 7.71°E					KX241543					Cesaroni et al. 2017	geographic coordinates only indicative
HE001975	23	88	Helix	ceratina	Falkner G.		shell	France: Corsica: Ajaccio: Campo dell’Oro	41.9225°N 8.785°E	SMNS	ZI0105034	CE3	MT949755	MT947424					Korábek et al. 2021
HE001976	23	88	Helix	ceratina	Falkner G.		shell	breeding stock from France: Corsica: Ajaccio: Campo dell’Oro	41.92°N 8.79°E	SMNS	ZI0105033	CE2	MT949756	MT947425		MW446104			Korábek et al. 2021	geographic coordinates only indicative	MW465460
HE001977	19	66	Helix	borealis	Korábek O.	2018	shell	Greece: Peloponnese: Linaria E of Archaia Olympia, bank of river Alfeios	37.6453°N 21.6878°E	NMBE	565395	BR32	MT949757	MT947426					Korábek et al. 2021
HE001978	33	128	Helix	figulina	Korábek O.	2018	shell	Greece: Evvia: Pournos	38.5147°N 23.7758°E	SMF	360419	FG32	MW443585	MW443954					this study
HE001979	33	126	Helix	figulina	Korábek O.	2018	shell	Greece: Evvia: Pournos	38.5147°N 23.7758°E	SMF	360419	FG33	MW443586						this study
HE001980	33	128	Helix	figulina	Korábek O.	2018	shell	Greece: Evvia: Pournos	38.5147°N 23.7758°E	SMF	360419	FG34	MW443587	MW443955					this study
HE001981	55	205	Caucasotachea	vindobonensis	Korábek O.	2018	shell	Greece: Central Macedonia: SE of Aridaia, bak of river Koziakas	40.9669°N 22.0783°E	NMP	P6M 30276	CV140	MW443588	MW443956					this study
HE001982	5	14	Helix	thessalica	Korábek O.	2018	shell	Greece: Eastern Macedonia and Thrace: Echinos env., bank of river Kompsatos	41.2928°N 24.9622°E	no voucher		TH33	MW443589						this study
HE001983	11	36	Helix	pomatia	Korábek O.	2018	shell	Italy: Trentino-Alto Adige/Südtirol: Lago di Vernago	46.733°N 10.848°E	no voucher		H199	MW443590						this study
HE001984	4	9	Helix	straminea	authors	2018	shell	Italy: Basilicata: Potenza Prov.: Ruvo del Monte, in mixed wood grove on Monte Prato	40.8358°N 15.5269°E				MW364280	MW376264					Petraccioli et al. 2021a
HE001985	4	9	Helix	straminea	authors	2018	shell	Italy: Campania: Salerno Prov.: Laviano	40.7794°N 15.3072°E				MW364279	MW376263					Petraccioli et al. 2021a
HE001986	26	99	Helix	pathetica	Korábek O.	2018	shell	Turkey: Aksaray Prov.: Narlı Gölü	38.34°N 34.45°E	coll. Horsák M.		PA4	MW443591				MW465478		this study	geographic coordinates only indicative
HE001987	11	36	Helix	pomatia	authors			France: Hauts-de-France: Aisne Dept.: Hirson	49.9428°N 4.0875°E	RMNH	.5006707.2							MK488031	Groenenberg & Duijm 2019
HE001988	23	88	Helix	ceratina	Korábek O.	2018	shell	France: Corsica: Ajaccio: Ricanto	41.924°N 8.783°E	HNHM	104914	CE5	MT949758		MW465530	MW446105	MW465479		Korábek et al. 2021	geographic coordinates only indicative
HE001989	24	89	Helix	lucorum	Korábek O.	2018	shell	Italy: Emilia Romagna: Parma Prov.: Bardi, castle hill	44.6295°N 9.7312°E	NMP	P6M 30409	H139	MW443592						this study
HE001990	24	89	Helix	lucorum	Korábek O.	2018	shell	Italy: Emilia Romagna: Parma Prov.: Calestano, near Castello di Ravarano	44.5739°N 10.0584°E	NMP	P6M 30413	LC132	MW443593						this study
HE001991	11	36	Helix	pomatia	Korábek O.	2018	shell	Croatia: Istria County: Pazin, by gas station on Istarskih Narodnjaka	45.2320°N 13.9200°E	NMP	P6M 30209	H039	MW443594						this study
HE001992	11	36	Helix	pomatia	Korábek O.	2018	shell	Croatia: Istria County: Pazin, by gas station on Istarskih Narodnjaka	45.2320°N 13.9200°E	NMP	P6M 30209	H066	MW443595						this study
HE001993	11	38	Helix	pomatia	Korábek O.	2018	shell	Croatia: Istria County: slope NW of Motovun	45.3388°N 13.8244°E	NMP	P6M 30267	H021	MW443596						this study
HE001994	11	38	Helix	pomatia	Korábek O.	2018	shell	Croatia: Istria County: slope NW of Motovun	45.3388°N 13.8244°E	NMP	P6M 30267	H047	MW443597						this study
HE001995	11	42	Helix	pomatia	Korábek O.	2018	shell	Croatia: Istria County: Vela Učka, on old road over Učka in direction Poklon	45.3065°N 14.2048°E	NMP	P6M 30205	H018	MW443598						this study
HE001996	11	42	Helix	pomatia	Korábek O.	2018	shell	Croatia: Istria County: Vela Učka, on old road over Učka in direction Poklon	45.3065°N 14.2048°E	NMP	P6M 30205	H051	MW443599						this study
HE001997	11	38	Helix	pomatia	Korábek O.	2018	shell	Croatia: Karlovac County: Novigrad na Dobri, castle ruins	45.4824°N 15.4533°E	NMP	P6M 30224	H034	MW443600						this study
HE001998	11	38	Helix	pomatia	Korábek O.	2018	shell	Croatia: Karlovac County: Novigrad na Dobri, castle ruins	45.4824°N 15.4533°E	NMP	P6M 30224	H060	MW443601						this study
HE001999	11	42	Helix	pomatia	Korábek O.	2018	shell	Croatia: Primorje-Gorski Kotar County: Dobra bank downstream of Vrbovsko	45.3657°N 15.0753°E	NMP	P6M 30203	H035	MW443602						this study
HE002000	11	42	Helix	pomatia	Korábek O.	2018	shell	Croatia: Primorje-Gorski Kotar County: Dobra bank downstream of Vrbovsko	45.3657°N 15.0753°E	NMP	P6M 30203	H053	MW443603						this study
[truncated: 567 more rows]

## Sheet: Table_S2_outgroups
ID	genus	species	locality	geographic coordinates (WGS84)	shells deposited in	collection number	16S acc. nos.	COI acc. nos.	reference 16S	reference COI	comments
AL000002	Allognathus	campanyonii	Spain: Mallorca: Clot de S'Aigua, Banyalbufar		EHUMC	1066	KM592646	KM592556	Chueca et al. 2015	Chueca et al. 2015
AL000003	Allognathus	campanyonii	Spain: Menorca: Ses Mongetes, Ciutadella		EHUMC	1094	KM592675	KM592585	Chueca et al. 2015	Chueca et al. 2015
AL000004	Allognathus	graellsianus	Spain: Mallorca, road Ma-10 at km 26 between crossing towards Sa Calobra and Lluc (W of Escorça)	39.8283°N 2.8375°E	EHUMC	1044	KR704985	KR705025	Neiber & Hausdorf 2015	Neiber & Hausdorf 2015
AL000001	Allognathus	hispanicus	Spain: Mallorca, Escorça, forest near Lluc monastery	39.8222°N 2.8869°E	EHUMC	1051	KR704986	KR705026	Neiber & Hausdorf 2015	Neiber & Hausdorf 2015
OT000001	Cantareus	apertus	Italy: Toscana: Campiglia near Colle di Val d'Elsa	43.4117°N 11.0747°E	NMP	P6M 30519	MW443863		this study
OT000002	Cantareus	apertus	Italy: Siena: Strada del Casone, MGRS 32TQN09				KU870009	KU869798	Fiorentino et al. 2016	Fiorentino et al. 2016
OT000003	Cantareus	apertus	Algeria: Tigzirt/Tizi Ouzou, DZ	36.8901°N 4.1279°E	NMBE	534199	MK883294	MK883424	Bouaziz-Yahiatene et al. 2019	Bouaziz-Yahiatene et al. 2019	C. koraegaelius sensu Bouaziz-Yahiatene et al. 2019
OT000004	Cantareus	subapertus	Algeria: Ighil Bourmi, DZ	36.4872°N 4.0613°E	NMBE	550458	MK883301	MK883426	Bouaziz-Yahiatene et al. 2019	Bouaziz-Yahiatene et al. 2019
AL000006	Cepaea	hortensis	Germany: Niedersachsen: Gaim forest near Höver	52.3433°N 9.8856°E	coll. Neiber M. T.	2546-Hel	KR704988	KR705028	Neiber & Hausdorf 2015	Neiber & Hausdorf 2015
AL000017	Cepaea	nemoralis	France: Carol	42.4914°N 1.8528°E			KC967169	KC955005	Grindon & Davison 2013	Grindon & Davison 2013
AL000016	Cepaea	nemoralis	United Kingdom: England: Malham	54.1200°N -2.1803°E			KC967154	KC954926	Grindon & Davison 2013	Grindon & Davison 2013
AL000012	Cepaea	nemoralis	Italy: Casabocci	43.3253°N 11.2100°E			KC967189	KC955072	Grindon & Davison 2013	Grindon & Davison 2013
AL000015	Cepaea	nemoralis	Croatia: Karlovac	45.4928°N 15.2228°E			KC967198	KC955112	Grindon & Davison 2013	Grindon & Davison 2013
AL000024	Cepaea	nemoralis	France: Occitania: Bethmale env., above Étang d'Eychelle	42.8431°N 1.0789°E	NMP	P6M 30349	MW443858		this study
AL000018	Cepaea	nemoralis	Germany: Niedersachsen: Sehnde, between villages Bilm and Höver	52.3453°N 9.9042°E	coll. Neiber M. T.	2541-Hel	KR704990	KR705033	Neiber & Hausdorf 2015	Neiber & Hausdorf 2015
AL000013	Cepaea	nemoralis	Poland: Milcz	53.0322°N 16.8700°E				KC955121		Grindon & Davison 2013
AL000014	Cepaea	nemoralis	France: Lit-et-Mixe	44.0328°N -1.2578°E			KC967195	KC955101	Grindon & Davison 2013	Grindon & Davison 2013
AL000019	Cepaea	nemoralis	Italy: Emilia Romagna: Parma prov.: Calestano, near Castello di Ravarano	44.5739°N 10.0584°E	NMP	P6M 30503	MW443855	MW443879	this study	this study
AL000020	Cepaea	nemoralis	France: Isère: near Beauregard-Baret	45.0066°N 5.1676°E	NMP	P6M 30369	MW443856	MW443880	this study	this study
AL000021	Cepaea	nemoralis	Italy: Emilia Romagna: Parma prov.: Bardi, Case Ini	44.6326°N 9.6175°E	NMP	P6M 30520	MW443857	MW443881	this study	this study
AL000022	Cepaea	nemoralis	Italy: Calabria, Serra San Bruno (VV)	38.56°N 16.31°E			MN395304	MN395341	Colomba, unpublished	Colomba, unpublished	geographic coordinates only indicative
AL000023	Cepaea	nemoralis	Italy: Apulia, Monte Faeto (FG)	41.36°N 15.16°E			MN395306		Colomba, unpublished		geographic coordinates only indicative
AL000026	Cepaea	nemoralis	France: Grand Est: Vosges: Contrexéville	48.2049°N 5.8954°E	ZMH	161160	MW443860	MW443882	this study	this study
OT000005	Cornu	aspersum	Chile: La Serena	-29.90°N -71.25°E			JQ417194	JQ417194	Gaitán-Espitia et al. 2013	Gaitán-Espitia et al. 2013
OT000006	Cornu	aspersum	unknown, from snail farm				AF126141		Guiller et al. 2001		sample of the ”maxima” form
OT000007	Cornu	aspersum	Algeria: Tichi	36.75°N 5.08°E			KU996454		Sherpa et al. 2018
OT000008	Cornu	aspersum	Morocco: El Hoceima	35.23°N -5.93°E			KU996660		Sherpa et al. 2018
OT000009	Cornu	aspersum	Morocco: Sahtriène	35.56°N -5.41°E			JX399889		Guiller et al. 2012
OT000010	Cornu	aspersum	Tunisia: Jendouba province: 2 km N of Jendouba (road no. P17)	36.5384°N 8.7411°E	no voucher		MW443864	MW444205	this study	this study
OT000012	Cornu	cephalaeditanum	Italy: Sicily: Palermo: Cefalú, La Rocca	38.0389°N 14.0264°E			MK883308	KR921889	Bouaziz-Yahiatene et al. 2019	Colomba et al. 2015
OT000013	Cornu	cretense	Greece: Crete: Agia Roumeli: rocks NW of	35.2314°N 23.9567°E	ZMH	148150	MT712856	MT712465	Hausdorf et al. 2021	Hausdorf et al. 2021
OT000014	Cornu	insolidum	Italy: Sicily: Trapani: Custonaci, Monte Cofano	38.1050°N 12.6725°E			MK883328	KR921894	Bouaziz-Yahiatene et al. 2019	Colomba et al. 2015
OT000015	Cornu	mazzullii	Italy: Sicily: Palermo: Cinisi, Monte Pecoraro	38.1578°N 13.1283°E			MK883319	KR921912	Bouaziz-Yahiatene et al. 2019	Colomba et al. 2015
OT000016	Eobania	cf. constantina	Algeria: 9 km W of Bouhamama	35.2833°N 6.6333°E			MN227731	MN241260	Holyoak et al. 2020	Holyoak et al. 2020
OT000017	Eobania	constantina	Algeria: Draâ-Ben Khedda/Tizi Ouzou/Kabylie, DZ	36.7318°N 3.9654°E	NMBE	534211	MF564119	MF564165	Bouaziz-Yahiatene et al. 2017	Bouaziz-Yahiatene et al. 2017
OT000018	Eobania	vermiculata	Spain: Canary Islands: Gran Canaria, Barranco de Azuaje	28.1092°N -15.5717°E	coll. Neiber M. T.	2553-Hel	KR704998	GU598216	Neiber & Hausdorf 2015	Neiber et al. 2011
OT000020	Eremina	desertorum	Egypt: El Alamein 95 km towards Cairo	30.600°N 29.867°E	ZMH	79775	KP230675	MW803145	Ali et al. 2016
OT000021	Eremina	dillwyniana	Morocco: ca 1km S of N1 at 41.5 km due SW of El Ouatia (centre)	28.25°N -11.67°E			KY197736	KY304090	Holyoak et al. 2018	Holyoak et al. 2018
OT000022	Eremina	duroi	Morocco: Souss-Massa-Drâa: Sidi Ifni	29.38°N -10.17°E	coll. Neiber M. T.	2527-Hel	KR704999	KR705036	Neiber & Hausdorf 2015	Neiber & Hausdorf 2015
OT000023	Eremina	inexpectata	Morocco: ca 0.3 km SW of N1 at 0.6 km due SW of Oued Draa at N1 road bridge	28.52°N -10.97°E			KY197733	KY304087	Holyoak et al. 2018	Holyoak et al. 2018
OT000025	Eremina	vermiculosa	Morocco: by R101 at 36 km due SW of Tantan (centre)	28.15°N -11.27°E			KY197734	KY304088	Holyoak et al. 2018	Holyoak et al. 2018
OT000074	Gyrostomella	gyrostoma	Libya: Jabal al Gharbi: Gasr Garian, gorge of well	32.17°N 13°E	ZMH	20922	MZ376669	MZ382606	Neiber et al. 2021b	Neiber et al. 2021b	geographic coordinates only indicative
OT000027	Gyrostomella	raymondi	Algeria: Bou Saada	35.1833°N 4.1500°E			KJ458535	MN241291	Razkin et al. 2015	Holyoak et al. 2020
OT000026	Gyrostomella	tripolitana	Libya: Jabal al Gharbi: Gebel Garian, north slope	32.27°N 13.02°E	ZMH	20921	MZ376672	MZ382609	Neiber et al. 2021b	Neiber et al. 2021b	geographic coordinates only indicative
AL000029	Hemicycla	bidentalis	Spain: Canary Islands: Tenerife				HM147218	HM147167	Neiber, unpublished	Neiber, unpublished
AL000032	Hemicycla	eurythyra	Spain: Canary Islands: Tenerife				HM147223	HM147172	Neiber, unpublished	Neiber, unpublished
AL000033	Hemicycla	glyceia	Spain: Canary Islands: Tenerife				HM147183	HM147145	Neiber, unpublished	Neiber 2010?	subsp. silensis
AL000034	Hemicycla	incisogranulata	Spain: Canary Islands: Tenerife				HM147185	HM147147	Neiber, unpublished	Neiber, unpublished
AL000030	Hemicycla	mascaensis	Spain: Canary Islands: Tenerife, Municipality of Buenavista del Norte, Lomo de Masca	28.3031°N -16.8403°E	coll. Neiber M. T.	1875-Hel	HM147208	GU598227	Neiber, unpublished	Neiber et al. 2011
AL000035	Hemicycla	melchori	Spain: Canary Islands: Tenerife				HM147189	HM147151	Neiber, unpublished	Neiber, unpublished
AL000036	Hemicycla	nivariae	Spain: Canary Islands: Tenerife				HM147196	HM147156	Neiber, unpublished	Neiber, unpublished
AL000037	Hemicycla	paeteliana	Spain: Canary Islands: Fuerteventura, Jandia					HM034455		Greve et al. 2010
AL000038	Hemicycla	paivanopsis	Spain: Canary Islands: La Gomera, Municipality of Vallehermoso, Barranco del Valle, western slope, MGRS 28RBS7820					GU598236		Neiber et al. 2011
AL000039	Hemicycla	plicaria	Spain: Canary Islands: Tenerife, Candelaria, Barranco de Samarines	28.3458°N -16.3706°E	coll. Neiber M. T.	2556-Hel	KR704994	GU598218	Neiber & Hausdorf 2015	Neiber et al. 2011
AL000031	Hemicycla	quadricincta	Spain: Canary Islands: La Gomera, Municipality of San Sebastián de la Gomera, 1 km west of Las Casetas close to the first tunnel on the road from San Sebastián de la Gomera to Hermigua, MGRS 28RBS8712					GU598223		Neiber et al. 2011
AL000040	Hemicycla	retrodens	Spain: Canary Islands: Tenerife				HM147194	HM147154	Neiber, unpublished	Neiber, unpublished
AL000041	Hemicycla	saponacea	Spain: Canary Islands: Gran Canaria, Municipality of San Bartolomé de Tirajana, Monteléon	27.8128°N -15.6117°E	coll. Neiber M. T.	2942-Hel		GU598230		Neiber et al. 2011
AL000042	Hemicycla	saponacea	Spain: Canary Islands: Gran Canaria, Municipality of Telde, Barranco de Pueste, southern slope, MGRS 28RDR6091					GU598235		Neiber et al. 2011
AL000043	Iberus	angustatus	Spain: Granada: venta El Molinillo	37.3057°N -3.4271°E			KC493778	KC693589	Martínez-Ortí & Robles 2013	Martínez-Ortí & Robles 2013	geographic coordinates only indicative
AL000048	Iberus	cobosi	Spain: Andalusia: Málaga, El Charcón (Valle de Abdalajís)	36.93°N 4.70°E	EHUMC	0919	EF440193	EF440243	Elejalde et al. 2008	Elejalde et al. 2008	geographic coordinates only indicative
AL000045	Iberus	gualtieranus	Spain: Andalusia: Sierra Elvira	37.4156°N -3.7250°E	EHUMC	1014	KR704995	KR705034	Neiber & Hausdorf 2015	Neiber & Hausdorf 2015
AL000044	Iberus	gualtieranus	Spain: MGRS 30SVG37				AY928592	AY928564	Elejalde et al. 2005	Elejalde et al. 2005
AL000046	Iberus	guiraoanus	Spain: MGRS 30SWH33				EF440199	EF440249	Elejalde et al. 2008	Elejalde et al. 2008
AL000047	Iberus	marmoratus	Spain: MGRS 30SUF17				EF440211	EF440261	Elejalde et al. 2008	Elejalde et al. 2008
AL000049	Iberus	ortizi	Spain: MGRS 30SUG84				EF440226	EF440276	Elejalde et al. 2008	Elejalde et al. 2008
AL000053	Iberus	splendidus	Spain: Murcia: Sierra de Quibas	38.32°N -1.08°E	MVHN	2270	KR704996	KR705035	Neiber & Hausdorf 2015	Neiber & Hausdorf 2015
OT000028	Loxana	alabastrites	Morocco: 1.1 km due N of Tafoughalt	34.8163°N -2.4122°E			MN227734	MN241272	Holyoak et al. 2020	Holyoak et al. 2020
OT000030	Loxana	beaumieri	Morocco: High Atlas south of Tizi-n-Test	30.8589°N -8.3742°E	SMF	342533	KP072407	KP072186	Korábek et al. 2015	Korábek et al. 2015
OT000029	Loxana	beaumieri	Morocco: 6.6 km due WSW of Bin-el-Ouidane	32.1355°N -6.5237°E			MN227735	MN241273	Holyoak et al. 2020	Holyoak et al. 2020
OT000031	Loxana	lechatelieri	Morocco: 13.8 km due NW of Boulemane	33.4423°N -4.8446°E			MN227737	MN241276	Holyoak et al. 2020	Holyoak et al. 2020
OT000032	Loxana	rerayana	Morocco: Asni, olive orchard by river Rheraya	31.2478°N -7.9786°E	NMBE		MW443866	MW444206	this study	this study
OT000033	Loxana	sp.	Morocco: 7.1 km due WNW of Taliouine	30.5519°N -7.9957°E			MN227739	MN241278	Holyoak et al. 2020	Holyoak et al. 2020
OT000034	Loxana	sp.	Morocco: 1.5 km SW of Mirght	29.4073°N -9.7176°E			MN227740	MN241279	Holyoak et al. 2020	Holyoak et al. 2020
OT000035	Loxana	sp.	Morocco: 3.9 km due E along road from Echatea El Abied	28.9608°N -10.5551°E			MN227741	MN241280	Holyoak et al. 2020	Holyoak et al. 2020
OT000036	Loxana	sp.	Morocco: 14 km due NE of Mirleft	29.6060°N -9.9115°E			MN227742	MN241281	Holyoak et al. 2020	Holyoak et al. 2020
OT000037	Macularia	niciensis	France: Provence-Alpes-Côte d'Azur: Alpes-Maritimes: Nice, in a garden	43.7000°N 7.2417°E	coll. Neiber M. T.	2370-Hel	KR705000	KR705037	Neiber & Hausdorf 2015	Neiber & Hausdorf 2015
OT000038	Macularia	niciensis	France: Provence-Alpes-Côte d'Azur: Alpes-Maritimes: Saorge, by the confluence of La Roya and Bendola	43.9821°N 7.5463°E	NMP	P6M 30416	MW443867	MW444207	this study	this study
OT000040	Macularia	sylvatica	Italy: Piemonte: Cuneo prov.: Colle di Tenda, Limone Piemonte, Tetti Mecci	44.1888°N 7.5625°E	NMP	P6M 30415	MW443868	MW444208	this study	this study
OT000044	Massylaea	punica	Algeria: 9 km W of Bouhamama	35.2833°N 6.6333°E			MN227748	MN241289	Holyoak et al. 2020	Holyoak et al. 2020
OT000045	Otala	hieroglyphicula	Alberia: Monts de Tlemcen, NW	34.7571°N -1.3193°E				MN241292		Holyoak et al. 2020
OT000046	Otala	juilleti	Algeria: Tlemcen	34.8340°N -1.3725°E			KJ458545	KM592621	Razkin et al. 2015	Holyoak et al. 2020
OT000047	Otala	lactea	Morocco: south of Ouezzane	34.5005°N -5.4688°E	SMF	342503	KP072365	KP072081	Korábek et al. 2015	Korábek et al. 2015
OT000049	Otala	occulta	Morocco: 15 km NE along road from Imouzzer-des-Marmoucha	33.5833°N -4.1833°E			MN227754	MN241297	Holyoak et al. 2020	Holyoak et al. 2020
OT000050	Otala	pallaryi	Morocco: 1.1 km due N of Tafoughalt	34.8163°N -2.4122°E			MN227755	MN241299	Holyoak et al. 2020	Holyoak et al. 2020
OT000051	Otala	punctata	Spain: País Vasco: Vitoria-Gasteiz: S of Mendizorrotza, rock outcrops near residence Juan Pablo I.	42.830°N -2.687°E	no voucher		MW443873	MW444212	this study
OT000052	Otala	sp.	Morocco: Etsedda/Kebdane	35.195°N -3.269°E	NMBE	545594	MK585077		Kneubühler et al. 2019
OT000053	Otala	tingitana	Morocco: near entrance to Grotte du Chameau	34.8381°N -2.3563°E			MN227760	MN241304	Holyoak et al. 2020	Holyoak et al. 2020
OT000054	Otala	xanthodon	Morocco: 14.3 km due WSW of Guercif	34.2054°N -3.4999°E			MN227762	MN241307	Holyoak et al. 2020	Holyoak et al. 2020
OT000057	Rossmaessleria	scherzeri	Morocco: SW slope of Jebel Messaoud	34.5153°N -5.9392°E	ZMH	101886	KU314790	KU314815	Walther et al. 2016	Walther et al. 2016
OT000058	Rossmaessleria	scherzeri	Chefchaouen, gorge of Ras el-Maa	35.1736°N -5.2564°E	ZMH	101889	KU314788	KU314813	Walther et al. 2016	Walther et al. 2016
OT000056	Rossmaessleria	scherzeri	Morocco: Tangier-Tétouan: Yebel Beni Hozmar	35.5417°N -5.3750°E	coll. Neiber M. T.	2555-Hel	KR705003	KR705040	Neiber & Hausdorf 2015	Neiber & Hausdorf 2015
OT000055	Rossmaessleria	scherzeri	United Kingdom: Gibraltar, Gibraltar Rock, Mediterranean steps below O'Hara Tower, 415 m	36.1250°N -5.3436°E	coll. Neiber M. T.	3206-Hel	KY818657	KY818659	Neiber 2017	Neiber 2017
OT000059	Theba	cf. clausoinflata	Spain: Canary Islands: Fuerteventura: Barranco los Canarios	28.1022°N -14.2967°E	ZFMK		KU521659	JN408108	Böckers et al. 2016	Greve et al. 2012
OT000060	Theba	chudeaui	Western Sahara: Laayoune Plage N	27.1120°N -13.3980°E	ZFMK		KU521710	HM034487	Böckers et al. 2016	Greve et al. 2010
OT000061	Theba	grasseti	Spain: Canary Islands: Gran Canaria: Punta de Arena	28.0403°N -15.7643°E	ZFMK		KU521677	JN408139	Böckers et al. 2016	Greve et al. 2012
OT000062	Theba	impugnata	Spain: Canary Islands: Lanzarote: road to Mirador de Haría	29.1315°N -13.5152°E	ZFMK		KU521758	HM114303	Böckers et al. 2016	Böckers et al. 2016
OT000063	Theba	macandrewiana	Portugal: Selvagem Grande	30.1428°N -15.8653°E	ZFMK		KU521743	JN408140	Böckers et al. 2016	Greve et al. 2012
OT000065	Theba	pisana	Spain: Canary Islands: Tenerife, Teno Mountains, Erjos, gardens in the village	28.3292°N -16.8056°E	coll. Neiber M. T.	2540-Hel	KR705004	KR705041	Neiber & Hausdorf 2015	Neiber & Hausdorf 2015
OT000064	Theba	pisana	Spain: Andalusia: Cadiz, road from Fuentebravia to Pena de Agila	26.6103°N -6.2813°E	ZFMK		KU521593	KF582618	Böckers et al. 2016	Haase et al. 2014	subsp. andalusica
OT000073	Theba	solimae	Morocco: 30 km N Bou Izakar	29.4462°N -9.6947°E	ZFMK		KU521741	KC526932	Böckers et al. 2016	Greve et al. 2017
OT000067	Theba	sp.	Spain: Canary Islands: Lanzarote: 2 km N Playa Blanca	28.8778°N -13.8327°E	ZFMK		KU521746	JN408185	Böckers et al. 2016	Greve et al. 2012
OT000068	Theba	subdentata	Morocco: E of Agadir, N of Oulad Berhil	30.7814°N -8.3943°E	NMP	P6M 30502	MW443875	MW444213	this study	this study
OT000072	unknown	unknown	Morocco: [between?] Essaouira and Agadir				KJ458490	MN241309	Razkin et al. 2015	Holyoak et al. 2018

## Sheet: collection_abbreviations
EHUMC	collection at the Zoology and Animal Cell Biology department, Universidad del País Vasco, Spain
HNHM	Magyar Természettudományi Múzeum (Hungarian Natural History Museum), Budapest, Hungary
MHNG	Muséum d'histoire naturelle de Genève (Natural History Museum of Geneva), Switzerland
MVHN	Museu Valencià d’Història Natural (Natural Science Museum of Valencia), Spain
NHMC	Μουσείο Φυσικής Ιστορίας Κρήτης (Natural History Museum of Crete), Iraklion, Crete
NHMW	Naturhistorisches Museum Wien (Natural History Museum Vienna), Austria
NMBE	Naturhistorisches Museum der Burgergemeinde Bern (Natural History Museum of Bern), Switzerland
NMP	Národní Muzeum (National Museum), Praha, Czechia
RMNH	Naturalis Biodiversity Center, Leiden, The Netherlands
SMF	Senckenberg Naturmuseum Frankfurt, Germany
SMNS	Staatliches Museum für Naturkunde Stuttgart (State Museum of Natural History Stuttgart), Germany
SNSD	Senckenberg Naturhistorische Sammlungen Dresden (Senckenberg Natural History Collections Dresden), Germany
USDA	United States Department of Agriculture, National Malacology Laboratory, Philadelphia, USA
ZFMK	Zoologisches Forschungsmuseum Alexander Koenig (Alexander Koenig Zoological Research Museum), Bonn, Germany
ZMH	Zoologisches Museum (Zoological Museum), Hamburg, Germany
